# Supplementary material for: Neutrality in the Metaorganism
Source: PubMed Central journal article supplement (PMC6583948; doi:10.1371/journal.pbio.3000298), 2019-06-19
Supplement: pbio.3000298.s001.pdf [file pbio.3000298.s001.pdf]

| Samples                           | Source  | #samples | #OTUs | best-fit $m$ | $R^2$   |           | AIC       |          | Reference |
|-----------------------------------|---------|----------|-------|--------------|---------|-----------|-----------|----------|-----------|
|                                   |         |          |       |              | neutral | neutral   | neutral   | binomial |           |
| <i>Caenorhabditis elegans</i>     |         |          |       |              |         |           |           |          |           |
| natural samples                   | natural | 22       | 193   | 0.03         | 0.37    | -673.2    | -452.5    |          | [1]       |
| lab samples                       | lab     | 34       | 106   | 0.01         | 0.33    | -330.0    | -208.2    |          |           |
| <i>Ircinia oros</i>               |         |          |       |              |         |           |           |          |           |
| Spain, Barcelona                  | natural | 11       | 1121  | 0.41         | 0.6     | -5391.47  | -4966.26  |          | [2]       |
| <i>Sarcotragus fasciculatus</i>   |         |          |       |              |         |           |           |          |           |
| Spain, Barcelona                  | natural | 12       | 735   | 0.83         | 0.81    | -3552.82  | -3165.09  |          | [2]       |
| <i>Carteriospongia foliascens</i> |         |          |       |              |         |           |           |          |           |
| Australia, Davies Reef            | natural | 15       | 939   | 0.36         | 0.6     | -5435.40  | -5007.39  |          | [2]       |
| Australia, Fantome Island         | natural | 14       | 728   | 0.81         | 0.79    | -3740.45  | -3336.08  |          |           |
| Australia, Orpheus Island         | natural | 15       | 750   | 0.86         | 0.8     | -3987.01  | -3539.84  |          |           |
| Australia, Green Island           | natural | 13       | 774   | 0.47         | 0.59    | -3846.0   | -3542.79  |          |           |
| Australia, Torres Strait          | natural | 7        | 336   | 0.78         | 0.58    | -1410.75  | -1244.0   |          |           |
| <i>Mus musculus</i>               |         |          |       |              |         |           |           |          |           |
| natural samples                   | natural | 69       | 281   | 0.11         | 0.84    | -1217.97  | -998.15   |          | [3]       |
| lab samples                       | lab     | 54       | 136   | 0.18         | 0.82    | -536.30   | -452.48   |          |           |
| <i>Nematostella vectensis</i>     |         |          |       |              |         |           |           |          |           |
| 1 day post fertilization (dpf)    | lab     | 6        | 226   | 0.23         | 0.46    | -738.68   | -655.06   |          | [4]       |
| 4 dpf                             | lab     | 15       | 149   | 0.33         | 0.67    | -521.62   | -479.29   |          |           |
| 40 dpf                            | lab     | 12       | 155   | 0.09         | 0.59    | -502.39   | -413.96   |          |           |
| 123 dpf                           | lab     | 12       | 195   | 0.39         | 0.69    | -678.72   | -623.49   |          |           |
| 385 dpf                           | lab     | 20       | 225   | 0.17         | 0.58    | -766.93   | -679.74   |          |           |
| 401 dpf                           | lab     | 8        | 120   | 0.7          | 0.74    | -446.34   | -402.59   |          |           |
| <i>Hydra vulgaris</i>             |         |          |       |              |         |           |           |          |           |
| 0.5 weeks after hatching (wah)    | lab     | 8        | 699   | 0.6          | 0.54    | -2527.91  | -2289.35  |          | [5]       |
| 2.5 wah                           | lab     | 8        | 248   | 0.28         | 0.44    | -820.92   | -756.19   |          |           |
| 5 wah                             | lab     | 8        | 242   | 0.53         | 0.45    | -1129.85  | -1041.28  |          |           |
| 9 wah                             | lab     | 8        | 257   | 0.5          | 0.43    | -833.46   | -765.88   |          |           |
| 15 wah                            | lab     | 8        | 140   | 0.45         | 0.59    | -466.20   | -432.55   |          |           |
| <i>Aurelia aurita</i>             |         |          |       |              |         |           |           |          |           |
| control                           | lab     | 5        | 163   | 0.91         | 0.69    | -624.96   | -538.45   |          | [6]       |
| quorum quenching (QQ)             | lab     | 18       | 391   | 0.62         | 0.85    | -1716.09  | -1532.6   |          |           |
| Environment                       |         |          |       |              |         |           |           |          |           |
| Compost                           | natural | 65       | 587   | 0.48         | 0.87    | -2690.26  | -2491.77  |          | [1]       |
| Seawater                          | natural | 16       | 2518  | 0.62         | 0.7     | -12345.33 | -11113.17 |          | [2]       |
| Sediment                          | natural | 12       | 3796  | 0.77         | 0.47    | -16658.27 | -14665.48 |          | [2]       |

## References

- [1] Dirksen P, Marsh SA, Braker I, Heitland N, Wagner S, Nakad R, et al. The native microbiome of the nematode *Caenorhabditis elegans*: gateway to a new host-microbiome model. *BMC Biology*. 2016;14(1):38.
- [2] Thomas T, Moitinho-Silva L, Lurgi M, Björk JR, Easson C, Astudillo-García C, et al. Diversity, structure and convergent evolution of the global sponge microbiome. *Nature Communications*. 2016;7:11870.
- [3] Wang J, Kalyan S, Steck N, Turner LM, Harr B, Künzel S, et al. Analysis of intestinal microbiota in hybrid house mice reveals evolutionary divergence in a vertebrate hologenome. *Nature Communications*. 2015;6:6440.
- [4] Mortzfeld BM, Urbanski S, Reitzel AM, Künzel S, Technau U, Fraune S. Response of bacterial colonization in *Nematostella vectensis* to development, environment and biogeography. *Environmental Microbiology*. 2016;18(6):1764–1781.
- [5] Franzenburg S, Fraune S, Altröck PM, Kuenzel S, Baines JF, Traulsen A, et al. Bacterial colonization of Hydra hatchlings follows a robust temporal pattern. *ISME Journal*. 2013;7:781–790.
- [6] Weiland-Bräuer N, Fischer MA, Pinnow N, Schmitz RA. Potential role of host-derived quorum quenching in modulating bacterial colonization in the moon jellyfish *Aurelia aurita*. *Scientific Reports*. 2019;9(1):34.
