# Supplementary material for: Neutrality in the Metaorganism
Source: PubMed Central journal article supplement (PMC6583948; doi:10.1371/journal.pbio.3000298), 2019-06-19
Supplement: pbio.3000298.s002.pdf [file pbio.3000298.s002.pdf]

| Domain   | Phylum         | Class               | Order            | Family            | Genus        |                   |
|----------|----------------|---------------------|------------------|-------------------|--------------|-------------------|
| Bacteria | Bacteroidetes  | Flavobacteria       | Flavobacteriales | Flavobacteriaceae | unclassified | over-represented  |
| Bacteria | Proteobacteria | Alphaproteobacteria | Rhizobiales      | Hyphomicrobiaceae | Devosia      |                   |
| Bacteria | Proteobacteria | Alphaproteobacteria | unclassified     | unclassified      | unclassified |                   |
| Bacteria | Proteobacteria | Betaproteobacteria  | Burkholderiales  | Alcaligenaceae    | unclassified |                   |
| Bacteria | Proteobacteria | Betaproteobacteria  | Burkholderiales  | Oxalobacteraceae  | unclassified |                   |
| Bacteria | Proteobacteria | Betaproteobacteria  | Burkholderiales  | unclassified      | unclassified |                   |
| Bacteria | Proteobacteria | Betaproteobacteria  | unclassified     | unclassified      | unclassified |                   |
| Bacteria | Proteobacteria | Gammaproteobacteria | Pseudomonadales  | Pseudomonadaceae  | unclassified |                   |
| Bacteria | Proteobacteria | Gammaproteobacteria | unclassified     | unclassified      | unclassified |                   |
| Bacteria | Proteobacteria | Gammaproteobacteria | Xanthomonadales  | Xanthomonadaceae  | unclassified |                   |
| Bacteria | unclassified   | unclassified        | unclassified     | unclassified      | unclassified |                   |
| Bacteria | Proteobacteria | Alphaproteobacteria | Rhizobiales      | Brucellaceae      | Ochrobactrum | under-represented |
