# Supplementary material for: Neutrality in the Metaorganism
Source: PubMed Central journal article supplement (PMC6583948; doi:10.1371/journal.pbio.3000298), 2019-06-19
Supplement: pbio.3000298.s003.pdf [file pbio.3000298.s003.pdf]

| Domain   | Phylum        | Class           | Order              | Family                            | Genus                    |                  |
|----------|---------------|-----------------|--------------------|-----------------------------------|--------------------------|------------------|
| Bacteria | Bacteroidetes | Bacteroidia     | Bacteroidales      | Bacteroidaceae                    | Acetomicrobium           | over-represented |
| Bacteria | Bacteroidetes | Bacteroidia     | Bacteroidales      | Porphyromonadaceae                | Proteiniphilum           |                  |
| Bacteria | Bacteroidetes | Flavobacteria   | Flavobacteriales   | Cryomorphaceae                    | Fluviicola               |                  |
| Bacteria | Firmicutes    | Clostridia      | Clostridiales      | Clostridiaceae 4                  | Caminicella              |                  |
| Bacteria | Firmicutes    | Clostridia      | Clostridiales      | Clostridiales_Incertae Sedis XIII | Anaerovorax              |                  |
| Bacteria | Firmicutes    | Clostridia      | Clostridiales      | Lachnospiraceae                   | Clostridium XIVb         |                  |
| Bacteria | Firmicutes    | Clostridia      | Clostridiales      | Lachnospiraceae                   | Coprococcus              |                  |
| Bacteria | Firmicutes    | Clostridia      | Clostridiales      | Lachnospiraceae                   | Dorea                    |                  |
| Bacteria | Firmicutes    | Clostridia      | Clostridiales      | Peptococcaceae 1                  | Peptococcus              |                  |
| Bacteria | Firmicutes    | Clostridia      | Clostridiales      | Ruminococcaceae                   | Acetanaerobacterium      |                  |
| Bacteria | Firmicutes    | Clostridia      | Clostridiales      | Ruminococcaceae                   | Anaerotruncus            |                  |
| Bacteria | Firmicutes    | Clostridia      | Clostridiales      | Ruminococcaceae                   | Ethanoligenens           |                  |
| Bacteria | Firmicutes    | Clostridia      | Clostridiales      | Ruminococcaceae                   | Flavonifractor           |                  |
| Bacteria | Firmicutes    | Clostridia      | Clostridiales      | Ruminococcaceae                   | Hydrogenoanaerobacterium |                  |
| Bacteria | Firmicutes    | Clostridia      | Clostridiales      | Ruminococcaceae                   | Sporobacter              |                  |
| Bacteria | Firmicutes    | Negativicutes   | Selenomonadales    | Veillonellaceae                   | Anaerospira              |                  |
| Bacteria | Bacteroidetes | Bacteroidia     | Bacteroidales      | Marinilabiaceae                   | Anaerophaga              |                  |
| Bacteria | Bacteroidetes | Bacteroidia     | Bacteroidales      | Porphyromonadaceae                | Butyricimonas            |                  |
| Bacteria | Bacteroidetes | Bacteroidia     | Bacteroidales      | Porphyromonadaceae                | Paludibacter             |                  |
| Bacteria | Bacteroidetes | Bacteroidia     | Bacteroidales      | Porphyromonadaceae                | Tannerella               |                  |
| Bacteria | Bacteroidetes | Bacteroidia     | Bacteroidales      | Rikenellaceae                     | Rikenella                |                  |
| Bacteria | Bacteroidetes | Sphingobacteria | Sphingobacteriales | Flammeovirgaceae                  | Sediminitomix            |                  |
| Bacteria | Firmicutes    | Clostridia      | Clostridiales      | Lachnospiraceae                   | Blautia                  |                  |
| Bacteria | Firmicutes    | Clostridia      | Clostridiales      | Lachnospiraceae                   | Butyrivibrio             |                  |
| Bacteria | Firmicutes    | Clostridia      | Clostridiales      | Lachnospiraceae                   | Catonella                |                  |
| Bacteria | Firmicutes    | Clostridia      | Clostridiales      | Lachnospiraceae                   | Marvinbryantia           |                  |
