# Supplementary material for: Neutrality in the Metaorganism
Source: PubMed Central journal article supplement (PMC6583948; doi:10.1371/journal.pbio.3000298), 2019-06-19

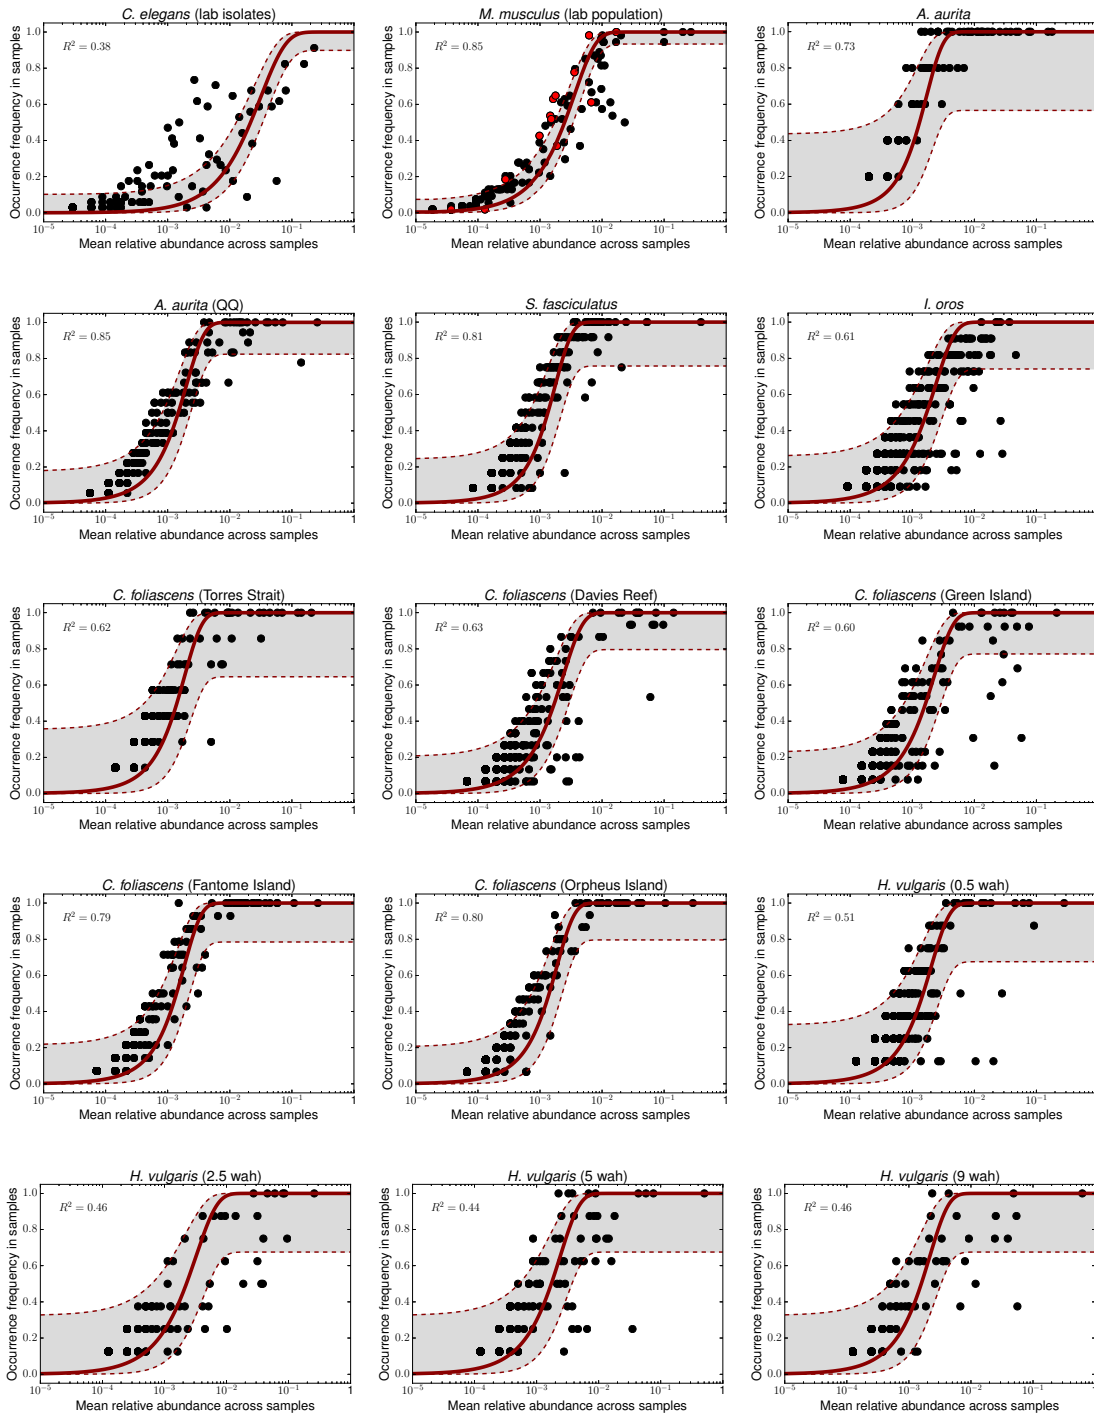

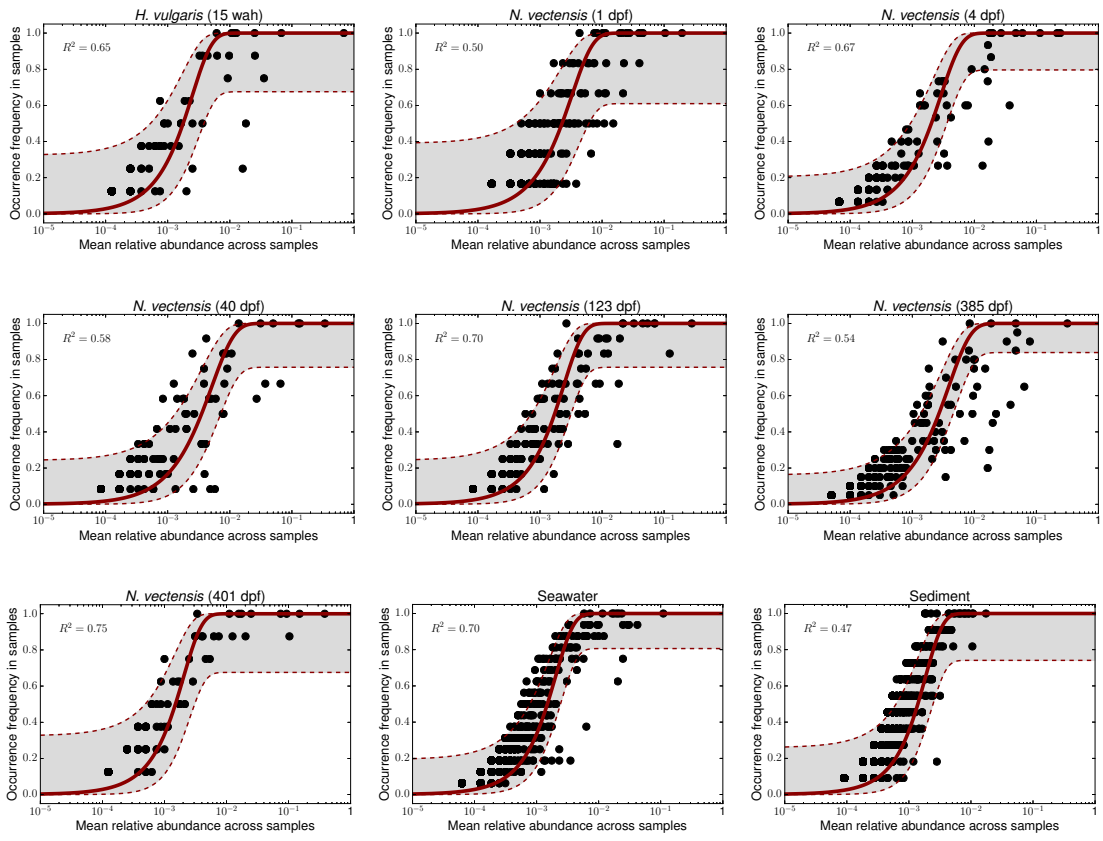

Supplement: pbio.3000298.s004.pdf [file pbio.3000298.s004.pdf]
