# Supplementary material for: Neutrality in the Metaorganism
Source: PLoS Biol. 2019 Jun 19;17(6):e3000298. doi: 10.1371/journal.pbio.3000298 (PMC6583948; doi:10.1371/journal.pbio.3000298)
Supplement: S10 Data — OTU, operational taxonomic unit. (XLSX) [file pbio.3000298.s020.xlsx]

## Sheet: aurelia_ob
otu_id	Polypen_ohne_Beschichtung_1	Polypen_ohne_Beschichtung_2	Polypen_ohne_Beschichtung_4	Polypen_ohne_Beschichtung_5	Polypen_ohne_Beschichtung_6
Otu00001	16131	8267	26878	1658	4960
Otu00002	20	0	65	1	3
Otu00003	11	3	26	7	1
Otu00004	0	0	0	0	0
Otu00005	6875	583	2316	63	321
Otu00006	6705	6432	16186	452	1312
Otu00007	2125	4879	1967	2701	1852
Otu00008	8919	15595	26074	1914	2954
Otu00009	233	66	873	16	2
Otu00010	1297	372	2909	50	835
Otu00011	3399	7246	4458	168	1516
Otu00012	673	665	515	155	614
Otu00013	12	3	148	0	3
Otu00014	74	32	102	44	0
Otu00015	375	331	1622	15	74
Otu00016	2809	2003	7047	333	869
Otu00017	1820	3861	3916	536	576
Otu00018	1288	1580	3453	203	450
Otu00019	665	213	1540	35	511
Otu00020	2	0	16	2	0
Otu00021	1564	5214	5373	885	866
Otu00022	562	406	1995	44	452
Otu00023	76	70	452	2	7
Otu00024	6	5	42	0	1
Otu00025	178	254	766	52	712
Otu00026	969	438	1799	59	110
Otu00027	247	481	990	14	65
Otu00028	1278	1116	1607	55	353
Otu00029	654	611	3643	45	78
Otu00030	0	0	0	0	0
Otu00031	1606	1324	3893	201	135
Otu00032	1042	907	1153	126	304
Otu00033	1148	1564	1613	119	222
Otu00034	2117	1399	1988	68	619
Otu00035	0	0	0	0	16
Otu00036	939	1013	1674	185	93
Otu00037	509	373	1270	59	55
Otu00038	92	97	502	1	34
Otu00039	39	63	390	3	6
Otu00040	444	290	1163	229	154
Otu00041	0	0	2	3	0
Otu00042	0	0	0	1	0
Otu00043	118	100	147	6	43
Otu00044	2	2	14	0	0
Otu00045	95	522	795	12	272
Otu00046	420	375	951	101	235
Otu00047	1	0	12	0	0
Otu00048	127	79	353	13	16
Otu00049	582	812	703	257	154
Otu00050	120	115	395	4	21
Otu00051	333	464	700	15	70
Otu00052	119	190	549	3	77
Otu00053	315	203	892	19	85
Otu00054	15	2	39	0	1
Otu00055	0	0	0	0	0
Otu00056	215	233	453	3	52
Otu00057	0	0	0	1	0
Otu00058	6	22	253	0	2
Otu00059	322	552	734	35	67
Otu00060	406	379	705	70	66
Otu00061	167	156	730	19	16
Otu00062	22	16	88	1	4
Otu00063	32	42	277	1	19
Otu00064	0	0	0	2	0
Otu00065	5	0	5	0	0
Otu00066	19	13	147	5	32
Otu00067	0	0	6	0	0
Otu00068	77	62	311	6	21
Otu00069	70	182	277	14	54
Otu00070	3	0	20	0	0
Otu00071	142	232	510	6	21
Otu00072	0	0	0	0	0
Otu00073	0	0	0	0	0
Otu00074	57	34	303	0	7
Otu00075	244	91	417	38	8
Otu00076	94	78	417	10	47
Otu00077	0	0	1	0	0
Otu00078	6	1	31	0	0
Otu00079	0	0	0	0	0
Otu00080	6	8	56	2	6
Otu00081	63	84	295	21	29
Otu00082	137	68	400	4	7
Otu00083	17	7	40	1	25
Otu00084	26	52	55	6	36
Otu00085	0	0	0	1	0
Otu00086	0	0	1	1	0
Otu00087	0	0	9	0	0
Otu00088	0	0	0	0	0
Otu00089	39	36	85	5	0
Otu00090	65	47	200	4	0
Otu00091	216	180	225	4	52
Otu00092	3	1	10	0	0
Otu00093	67	112	262	5	40
Otu00094	2	0	6	0	0
Otu00095	26	4	352	0	6
Otu00096	0	0	1	0	0
Otu00097	1	0	1	0	0
Otu00098	0	0	0	0	0
Otu00099	49	39	174	8	6
Otu00100	68	18	183	3	6
Otu00101	2	0	19	0	0
Otu00102	70	93	185	24	23
Otu00103	15	7	75	0	6
Otu00104	1	27	78	2	3
Otu00105	46	52	162	23	14
Otu00106	71	117	125	0	13
Otu00107	0	0	0	0	0
Otu00108	0	1	5	0	0
Otu00109	2	2	94	0	8
Otu00110	0	0	4	0	0
Otu00111	0	0	2	0	0
Otu00112	12	15	36	1	6
Otu00113	0	0	0	0	0
Otu00114	43	71	32	4	36
Otu00115	23	36	51	4	19
Otu00116	9	57	151	10	58
Otu00117	0	0	1	0	0
Otu00118	6	2	8	0	0
Otu00119	32	27	70	5	7
Otu00120	45	84	59	2	0
Otu00121	0	0	6	0	0
Otu00122	50	35	93	4	4
Otu00123	31	115	121	8	10
Otu00124	11	16	57	1	27
Otu00125	0	0	0	0	0
Otu00126	16	57	95	1	15
Otu00127	0	0	0	0	0
Otu00128	0	0	0	0	0
Otu00129	9	1	15	0	3
Otu00130	0	0	0	0	0
Otu00131	7	0	21	2	0
Otu00132	16	77	29	12	20
Otu00133	20	14	33	3	10
Otu00134	31	11	76	2	0
Otu00135	26	37	59	14	12
Otu00136	0	0	5	0	0
Otu00137	4	2	25	0	1
Otu00138	59	119	61	0	0
Otu00139	9	15	152	0	21
Otu00140	7	11	35	0	15
Otu00141	26	12	24	0	0
Otu00142	5	1	7	0	0
Otu00143	0	0	0	0	0
Otu00144	9	12	10	1	5
Otu00145	42	26	42	3	3
Otu00146	6	18	78	0	3
Otu00147	4	1	16	2	2
Otu00148	11	8	129	9	15
Otu00149	0	0	0	1	0
Otu00150	5	0	8	0	0
Otu00151	24	64	82	13	15
Otu00152	13	17	80	0	3
Otu00153	1	0	3	0	0
Otu00154	29	51	65	4	7
Otu00155	11	12	56	4	0
Otu00156	3	36	24	0	0
Otu00157	29	37	100	4	15
Otu00158	34	8	225	4	0
Otu00159	0	0	0	0	0
Otu00160	7	9	19	0	0
Otu00161	0	0	0	0	0
Otu00162	9	15	96	3	4
Otu00163	0	0	0	0	6
Otu00164	3	0	12	0	0
Otu00165	21	2	15	0	11
Otu00166	12	53	49	13	0
Otu00167	0	0	0	0	0
Otu00168	5	2	2	1	2
Otu00169	0	0	1	0	0
Otu00170	35	17	41	0	3
Otu00171	27	12	27	1	5
Otu00172	0	0	1	0	0
Otu00173	4	6	14	1	0
Otu00174	0	0	0	0	0
Otu00175	6	16	4	4	7
Otu00176	2	0	8	0	2
Otu00177	0	1	0	0	0
Otu00178	0	0	0	0	0
Otu00179	0	0	0	0	0
Otu00180	0	0	0	0	0
Otu00181	0	0	0	0	0
Otu00182	26	3	46	0	3
Otu00183	28	16	50	1	0
Otu00184	2	3	14	0	0
Otu00185	18	8	21	3	3
Otu00186	0	0	0	0	0
Otu00187	9	26	54	0	13
Otu00188	0	0	0	0	0
Otu00189	12	6	20	5	0
Otu00190	3	7	79	1	1
Otu00191	3	1	24	0	0
Otu00192	11	7	0	0	2
Otu00193	10	2	16	0	1
Otu00194	13	7	9	0	3
Otu00195	0	2	2	0	0
Otu00196	0	0	0	0	0
Otu00197	1	13	45	3	9
Otu00198	4	1	45	2	5
Otu00199	3	16	105	1	0
Otu00200	2	3	5	2	1
Otu00201	3	6	43	0	4
Otu00202	0	0	0	0	0
Otu00203	0	0	2	0	0
Otu00204	0	0	0	0	0
Otu00205	0	0	0	0	0
Otu00206	0	0	0	0	0
Otu00207	0	0	0	0	0
Otu00208	14	5	56	2	2
Otu00209	0	1	10	1	1
Otu00210	0	1	48	1	18
Otu00211	9	1	12	0	0
Otu00212	1	0	1	1	0
Otu00213	7	0	1	0	0
Otu00214	9	22	11	2	4
Otu00215	2	1	4	1	0
Otu00216	0	0	0	0	0
Otu00217	0	2	24	2	0
Otu00218	0	0	0	0	0
Otu00219	1	0	2	0	0
Otu00220	1	0	0	0	0
Otu00221	1	0	2	0	0
Otu00222	0	55	4	0	0
Otu00223	10	2	3	0	2
Otu00224	0	0	2	0	0
Otu00225	0	1	4	0	0
Otu00226	0	0	0	0	0
Otu00227	0	0	0	0	0
Otu00228	26	29	30	0	4
Otu00229	0	0	0	0	0
Otu00230	0	0	7	0	0
Otu00231	0	1	1	0	0
Otu00232	0	0	0	0	0
Otu00233	0	0	0	0	0
Otu00234	0	0	0	0	0
Otu00235	0	0	3	0	0
Otu00236	2	0	7	0	0
Otu00237	0	2	46	0	6
Otu00238	0	0	8	0	0
Otu00239	9	24	16	10	1
Otu00240	2	1	6	0	0
Otu00241	0	0	0	0	0
Otu00242	0	0	0	0	0
Otu00243	0	1	19	3	0
Otu00244	0	14	11	0	1
Otu00245	5	2	6	0	1
Otu00246	8	3	22	1	2
Otu00247	1	2	11	0	0
Otu00248	0	0	2	0	0
Otu00249	0	0	1	0	0
Otu00250	27	13	51	4	0
Otu00251	0	0	0	0	0
Otu00252	3	5	22	0	6
Otu00253	0	11	38	14	11
Otu00254	0	0	2	0	0
Otu00255	3	1	3	0	0
Otu00256	5	13	37	5	0
Otu00257	12	0	24	2	0
Otu00258	0	0	0	0	0
Otu00259	0	0	0	0	0
Otu00260	1	0	3	0	0
Otu00261	0	0	0	0	0
Otu00262	2	3	28	0	0
Otu00263	11	12	27	1	4
Otu00264	3	8	31	0	0
Otu00265	0	0	0	0	0
Otu00266	11	8	20	0	11
Otu00267	0	0	2	0	0
Otu00268	1	7	38	1	0
Otu00269	0	0	1	0	0
Otu00270	2	0	0	0	0
Otu00271	0	0	0	3	0
Otu00272	1	3	2	0	1
Otu00273	2	4	3	0	1
Otu00274	5	1	3	0	0
Otu00275	0	0	0	0	0
Otu00276	6	0	0	3	0
Otu00277	0	0	0	0	0
Otu00278	0	0	1	0	0
Otu00279	9	14	12	1	4
Otu00280	1	0	0	3	0
Otu00281	2	0	2	0	0
Otu00282	0	0	0	0	0
Otu00283	2	9	12	0	2
Otu00284	0	0	0	0	0
Otu00285	1	25	30	0	0
Otu00286	4	0	1	0	0
Otu00287	1	15	0	0	0
Otu00288	12	24	19	2	1
Otu00289	5	0	0	0	0
Otu00290	0	0	0	0	0
Otu00291	11	13	50	0	0
Otu00292	5	9	10	0	0
Otu00293	0	0	1	0	0
Otu00294	1	2	17	0	0
Otu00295	0	0	0	0	0
Otu00296	0	0	0	0	0
Otu00297	1	0	3	0	0
Otu00298	0	0	1	0	3
Otu00299	0	0	0	0	0
Otu00300	11	7	13	2	0
Otu00301	0	0	3	0	0
Otu00302	1	4	12	0	0
Otu00303	0	0	0	0	0
Otu00304	4	0	24	0	0
Otu00305	3	1	5	1	0
Otu00306	3	0	1	0	0
Otu00307	10	15	16	0	4
Otu00308	7	10	12	1	3
Otu00309	0	0	6	0	0
Otu00310	0	2	0	0	0
Otu00311	0	2	0	0	0
Otu00312	0	0	0	0	0
Otu00313	1	0	7	0	0
Otu00314	0	28	0	0	0
Otu00315	0	8	0	0	0
Otu00316	0	0	0	0	0
Otu00317	0	0	0	0	0
Otu00318	8	2	10	0	2
Otu00319	0	0	0	0	0
Otu00320	0	0	0	0	0
Otu00321	1	4	0	0	0
Otu00322	3	7	19	0	0
Otu00323	0	0	0	0	2
Otu00324	0	0	2	0	0
Otu00325	18	0	0	3	0
Otu00326	4	0	3	2	1
Otu00327	0	1	0	0	0
Otu00328	2	1	5	0	1
Otu00329	0	2	0	3	0
Otu00330	3	7	5	4	0
Otu00331	8	0	0	0	37
Otu00332	2	1	5	0	0
Otu00333	0	0	0	0	0
Otu00334	1	0	0	0	0
Otu00335	0	0	2	0	0
Otu00336	5	10	16	2	0
Otu00337	7	0	2	2	0
Otu00338	1	6	10	1	0
Otu00339	4	1	0	1	0
Otu00340	0	0	0	0	0
Otu00341	3	10	16	2	2
Otu00342	2	0	0	0	0
Otu00343	0	0	38	0	0
Otu00344	0	6	9	1	1
Otu00345	0	0	0	0	0
Otu00346	17	0	0	0	21
Otu00347	0	0	0	0	0
Otu00348	0	3	2	0	4
Otu00349	0	0	0	0	0
Otu00350	2	0	2	0	0
Otu00351	0	0	0	0	0
Otu00352	0	0	0	0	0
Otu00353	0	0	0	1	0
Otu00354	0	0	0	0	0
Otu00355	0	0	49	0	0
Otu00356	25	0	0	0	1
Otu00357	1	0	2	0	1
Otu00358	0	0	0	0	0
Otu00359	0	0	0	0	0
Otu00360	0	0	0	0	0
Otu00361	5	7	23	1	0
Otu00362	0	0	0	0	0
Otu00363	0	0	0	0	0
Otu00364	3	1	0	0	14
Otu00365	10	0	0	16	0
Otu00366	0	0	0	0	0
Otu00367	0	0	7	0	0
Otu00368	5	11	0	0	0
Otu00369	2	0	0	0	0
Otu00370	0	3	5	0	0
Otu00371	2	0	0	0	0
Otu00372	0	0	0	0	0
Otu00373	0	0	0	0	0
Otu00374	0	0	0	0	0
Otu00375	0	9	6	0	0
Otu00376	0	0	0	1	0
Otu00377	0	0	0	0	0
Otu00378	0	0	0	0	0
Otu00379	8	9	17	0	0
Otu00380	0	0	0	0	2
Otu00381	0	0	0	0	0
Otu00382	0	0	0	0	0
Otu00383	3	7	13	1	1
Otu00384	0	0	0	1	0
Otu00385	0	2	0	0	0
Otu00386	0	0	36	0	0
Otu00387	2	0	3	0	0
Otu00388	0	0	11	0	0
Otu00389	0	0	0	0	0
Otu00390	0	0	0	0	0
Otu00391	0	0	10	0	0
Otu00392	8	0	6	0	0
Otu00393	0	0	0	0	0
Otu00394	1	0	7	0	0
Otu00395	0	0	0	0	0
Otu00396	6	7	7	2	1
Otu00397	2	0	3	1	0
Otu00398	0	0	0	0	0
Otu00399	1	0	0	0	0
Otu00400	2	6	2	0	0
Otu00401	3	0	11	0	2
Otu00402	5	0	34	2	0
Otu00403	1	0	0	0	0
Otu00404	0	0	0	0	0
Otu00405	0	0	0	0	0
Otu00406	0	0	0	0	0
Otu00407	0	4	24	0	0
Otu00408	0	0	0	0	0
Otu00409	6	2	6	0	1
Otu00410	0	0	0	0	0
Otu00411	0	0	3	0	0
Otu00412	0	0	0	0	0
Otu00413	0	0	0	0	0
Otu00414	0	0	0	0	0
Otu00415	3	0	14	0	0
Otu00416	0	10	32	0	0
Otu00417	2	2	2	1	2
Otu00418	1	1	0	0	0
Otu00419	0	0	0	0	0
Otu00420	0	0	0	0	0
Otu00421	0	0	0	0	0
Otu00422	0	0	0	0	0
Otu00423	2	0	0	0	0
Otu00424	0	0	0	0	0
Otu00425	0	7	0	0	0
Otu00426	0	0	0	0	0
Otu00427	0	0	0	0	0
Otu00428	0	0	0	0	0
Otu00429	0	0	0	0	0
Otu00430	2	2	6	0	2
Otu00431	1	2	0	0	0
Otu00432	0	0	0	0	0
Otu00433	0	0	0	0	0
Otu00434	0	0	0	0	0
Otu00435	0	0	0	0	0
Otu00436	0	0	0	0	0
Otu00437	0	0	0	0	0
Otu00438	0	5	4	0	0
Otu00439	0	0	0	0	0
Otu00440	1	1	6	0	0
Otu00441	0	0	10	0	0
Otu00442	0	0	0	0	0
Otu00443	0	0	0	0	0
Otu00444	0	0	0	0	1
Otu00445	1	3	8	0	0
Otu00446	0	0	0	0	0
Otu00447	0	0	0	0	0
Otu00448	5	2	1	0	0
Otu00449	0	0	0	0	0
Otu00450	0	0	0	0	0
Otu00451	0	0	0	0	0
Otu00452	0	0	1	0	1
Otu00453	0	2	0	1	0
Otu00454	1	1	5	0	1
Otu00455	0	1	5	0	0
Otu00456	0	1	0	1	0
Otu00457	0	1	3	0	0
Otu00458	0	0	0	0	0
Otu00459	1	0	0	0	0
Otu00460	3	0	2	0	0
Otu00461	4	5	4	0	0
Otu00462	0	0	0	0	0
Otu00463	0	0	0	0	0
Otu00464	0	2	0	0	0
Otu00465	0	0	0	0	0
Otu00466	0	0	0	0	0
Otu00467	0	0	0	0	0
Otu00468	0	0	0	0	0
Otu00469	0	0	22	0	0
Otu00470	0	0	0	0	0
Otu00471	23	0	0	0	0
Otu00472	0	0	0	0	0
Otu00473	0	0	8	0	2
Otu00474	0	0	0	0	0
Otu00475	0	0	0	0	0
Otu00476	6	0	0	0	0
Otu00477	0	0	0	0	0
Otu00478	0	0	0	0	0
Otu00479	0	0	0	0	0
Otu00480	0	0	0	0	0
Otu00481	0	0	0	0	0
Otu00482	2	4	6	0	0
Otu00483	0	0	0	0	0
Otu00484	0	0	0	0	0
Otu00485	0	0	0	0	0
Otu00486	0	0	2	0	0
Otu00487	0	0	0	0	0
Otu00488	0	0	2	0	0
Otu00489	0	0	4	0	0
Otu00490	0	0	0	0	0
Otu00491	0	0	0	0	0
Otu00492	0	0	0	0	0
Otu00493	1	1	3	0	0
Otu00494	0	0	55	0	0
Otu00495	0	0	0	0	0
Otu00496	2	0	2	0	4
Otu00497	0	0	0	0	0
Otu00498	0	0	0	0	0
Otu00499	0	0	0	0	0
Otu00500	7	5	8	1	0
Otu00501	2	1	0	0	0
Otu00502	0	0	0	0	0
Otu00503	2	1	0	0	0
Otu00504	0	0	0	0	0
Otu00505	0	4	0	0	0
Otu00506	0	2	0	0	0
Otu00507	4	1	3	0	0
Otu00508	4	1	8	0	0
Otu00509	0	0	0	0	0
Otu00510	0	0	0	0	0
Otu00511	4	2	7	2	0
Otu00512	0	0	0	0	0
Otu00513	0	0	0	0	0
Otu00514	0	5	2	0	3
Otu00515	0	1	0	0	0
Otu00516	0	0	0	0	0
Otu00517	1	1	11	0	0
Otu00518	0	0	1	0	1
Otu00519	0	0	0	0	0
Otu00520	0	1	0	0	0
Otu00521	0	2	2	0	1
Otu00522	0	0	1	0	0
Otu00523	0	0	0	0	0
Otu00524	0	0	0	0	0
Otu00525	0	0	0	0	0
Otu00526	1	0	0	0	0
Otu00527	0	0	0	0	0
Otu00528	0	0	0	0	0
Otu00529	0	0	0	0	0
Otu00530	0	0	0	0	0
Otu00531	2	3	8	0	0
Otu00532	0	0	0	3	0
Otu00533	0	0	0	0	0
Otu00534	0	0	0	0	0
Otu00535	0	0	0	0	0
Otu00536	0	0	0	0	0
Otu00537	0	0	0	0	0
Otu00538	0	0	0	0	0
Otu00539	0	0	0	0	0
Otu00540	0	0	0	0	0
Otu00541	0	0	0	0	0
Otu00542	6	1	0	0	0
Otu00543	0	0	8	0	0
Otu00544	0	0	0	0	0
Otu00545	0	0	0	0	0
Otu00546	0	0	0	0	0
Otu00547	0	0	0	0	0
Otu00548	0	0	0	0	0
Otu00549	1	5	2	0	0
Otu00550	0	0	0	0	0
Otu00551	0	10	0	0	0
Otu00552	2	0	2	0	0
Otu00553	1	0	2	0	0
Otu00554	0	0	0	0	0
Otu00555	0	0	0	0	0
Otu00556	0	1	8	0	0
Otu00557	0	0	0	0	0
Otu00558	0	0	0	0	0
Otu00559	0	0	0	0	0
Otu00560	0	0	0	0	0
Otu00561	0	0	0	0	0
Otu00562	0	0	0	0	0
Otu00563	0	0	0	0	0
Otu00564	0	0	0	0	0
Otu00565	0	0	0	0	0
Otu00566	1	0	0	0	0
Otu00567	0	1	0	0	0
Otu00568	0	0	0	0	0
Otu00569	0	0	0	0	0
Otu00570	0	0	0	0	0
Otu00571	0	0	0	0	0
Otu00572	0	0	0	0	0
Otu00573	0	0	1	0	0
Otu00574	0	0	1	0	0
Otu00575	0	0	0	0	0
Otu00576	0	1	0	0	0
Otu00577	1	0	2	0	0
Otu00578	0	0	0	0	0
Otu00579	0	0	0	0	0
Otu00580	0	0	1	0	0
Otu00581	0	0	0	0	0
Otu00582	0	0	0	0	0
Otu00583	1	0	2	0	0
Otu00584	0	0	0	0	0
Otu00585	0	0	0	0	0
Otu00586	0	0	0	0	0
Otu00587	0	0	0	0	0
Otu00588	3	2	5	0	0
Otu00589	0	0	4	0	0
Otu00590	1	0	2	0	0
Otu00591	0	0	0	0	0
Otu00592	0	0	0	0	0
Otu00593	0	0	0	0	0
Otu00594	0	0	0	0	0
Otu00595	0	0	0	0	29
Otu00596	3	3	7	2	1
Otu00597	2	2	5	0	0
Otu00598	0	0	0	0	0
Otu00599	3	0	0	0	0
Otu00600	0	0	0	0	0
Otu00601	0	0	0	0	0
Otu00602	0	0	0	0	0
Otu00603	0	0	0	0	0
Otu00604	0	0	0	0	0
Otu00605	0	0	0	0	0
Otu00606	0	0	0	0	0
Otu00607	1	2	0	0	0
Otu00608	0	0	0	0	0
Otu00609	0	0	1	0	0
Otu00610	1	0	0	0	0
Otu00611	0	0	0	0	0
Otu00612	0	0	0	0	0
Otu00613	0	0	0	0	0
Otu00614	0	0	0	0	0
Otu00615	0	0	0	0	0
Otu00616	0	0	0	0	0
Otu00617	0	0	0	0	0
Otu00618	0	0	0	0	0
Otu00619	3	2	1	0	0
Otu00620	1	5	4	1	0
Otu00621	0	0	0	0	0
Otu00622	0	0	0	0	0
Otu00623	0	0	1	0	0
Otu00624	0	0	0	0	0
Otu00625	6	3	3	0	3
Otu00626	1	0	0	0	0
Otu00627	0	0	0	0	0
Otu00628	3	3	2	0	0
Otu00629	0	1	0	0	0
Otu00630	0	2	0	0	1
Otu00631	0	0	0	0	0
Otu00632	0	0	0	0	0
Otu00633	0	0	0	0	0
Otu00634	0	0	0	0	0
Otu00635	0	0	0	0	0
Otu00636	0	0	0	0	0
Otu00637	0	0	0	0	0
Otu00638	0	0	0	0	0
Otu00639	0	0	4	0	0
Otu00640	0	0	0	0	0
Otu00641	0	0	0	0	0
Otu00642	0	0	0	0	0
Otu00643	0	0	0	0	0
Otu00644	0	0	0	0	0
Otu00645	1	0	0	0	0
Otu00646	0	0	0	0	0
Otu00647	0	0	1	0	0
Otu00648	0	0	0	0	0
Otu00649	0	0	0	0	0
Otu00650	0	2	0	0	0
Otu00651	0	0	0	0	0
Otu00652	0	0	0	0	0
Otu00653	0	0	0	0	0
Otu00654	0	8	17	0	0
Otu00655	1	0	1	0	0
Otu00656	0	0	0	0	0
Otu00657	0	0	0	0	0
Otu00658	2	14	1	0	0
Otu00659	0	0	0	0	0
Otu00660	0	0	0	0	0
Otu00661	0	0	0	0	0
Otu00662	0	0	0	0	0
Otu00663	0	0	0	0	0
Otu00664	0	0	0	0	0
Otu00665	0	2	0	0	1
Otu00666	0	0	0	0	0
Otu00667	0	0	0	0	0
Otu00668	0	0	0	0	0
Otu00669	0	0	0	0	0
Otu00670	0	0	0	0	0
Otu00671	0	0	0	0	0
Otu00672	0	0	0	0	0
Otu00673	0	0	0	0	0
Otu00674	0	0	0	0	0
Otu00675	0	0	0	0	1
Otu00676	0	1	1	0	0
Otu00677	7	0	0	0	0
Otu00678	0	0	0	0	0
Otu00679	0	0	1	0	0
Otu00680	0	4	0	0	0
Otu00681	0	0	0	0	0
Otu00682	0	0	1	0	0
Otu00683	0	0	26	0	0
Otu00684	0	0	0	0	0
Otu00685	0	0	0	0	0
Otu00686	0	0	0	0	0
Otu00687	0	11	0	0	0
Otu00688	0	2	1	0	0
Otu00689	1	1	2	1	0
Otu00690	0	30	0	0	0
Otu00691	0	2	3	0	0
Otu00692	0	1	0	0	0
Otu00693	0	0	0	0	0
Otu00694	0	0	0	0	0
Otu00695	0	0	0	0	0
Otu00696	0	0	0	0	0
Otu00697	0	0	9	0	0
Otu00698	0	0	0	0	0
Otu00699	1	1	0	0	0
Otu00700	0	0	0	0	0
Otu00701	0	0	0	0	0
Otu00702	0	0	2	0	0
Otu00703	0	0	0	0	0
Otu00704	0	0	0	0	0
Otu00705	1	2	6	0	0
Otu00706	0	0	0	0	0
Otu00707	0	0	0	0	0
Otu00708	0	0	0	0	0
Otu00709	0	0	0	0	0
Otu00710	0	0	0	0	0
Otu00711	0	4	4	0	0
Otu00712	0	0	0	0	0
Otu00713	0	0	1	0	0
Otu00714	0	0	0	0	0
Otu00715	0	0	0	0	0
Otu00716	0	0	0	0	0
Otu00717	0	0	1	0	0
Otu00718	0	0	0	0	0
Otu00719	0	0	0	0	0
Otu00720	0	0	0	0	0
Otu00721	0	0	7	0	0
Otu00722	0	0	0	0	0
Otu00723	0	0	0	0	0
Otu00724	0	0	0	0	0
Otu00725	0	0	0	0	0
Otu00726	0	0	0	0	0
Otu00727	0	0	0	0	0
Otu00728	0	0	0	0	0
Otu00729	2	0	0	0	0
Otu00730	0	0	0	0	0
Otu00731	2	0	3	1	0
Otu00732	0	0	0	0	0
Otu00733	0	0	0	0	0
Otu00734	1	0	0	0	0
Otu00735	0	0	2	0	0
Otu00736	2	0	0	0	0
Otu00737	0	4	0	0	0
Otu00738	0	0	2	0	0
Otu00739	0	0	0	0	0
Otu00740	0	0	0	0	0
Otu00741	3	1	0	0	0
Otu00742	0	0	0	0	0
Otu00743	0	0	0	0	0
Otu00744	0	0	0	0	0
Otu00745	2	0	0	0	0
Otu00746	0	0	1	1	0
Otu00747	0	0	1	0	0
Otu00748	0	0	11	0	0
Otu00749	0	0	0	0	0
Otu00750	0	0	0	0	0
Otu00751	0	0	1	0	0
Otu00752	0	0	0	0	0
Otu00753	1	0	0	0	0
Otu00754	0	0	0	0	0
Otu00755	0	16	0	0	0
Otu00756	0	0	0	0	0
Otu00757	0	0	1	0	0
Otu00758	1	1	2	0	0
Otu00759	0	0	0	0	0
Otu00760	0	0	0	0	0
Otu00761	0	0	0	0	0
Otu00762	0	0	0	0	0
Otu00763	0	0	0	0	0
Otu00764	0	0	0	0	0
Otu00765	0	0	0	0	0
Otu00766	2	4	1	1	1
Otu00767	0	0	0	0	0
Otu00768	0	0	0	0	0
Otu00769	1	0	0	0	0
Otu00770	0	0	0	0	0
Otu00771	0	1	1	0	0
Otu00772	0	0	0	0	0
Otu00773	0	0	0	0	0
Otu00774	0	0	0	0	0
Otu00775	0	0	0	0	0
Otu00776	0	0	2	0	0
Otu00777	0	0	0	0	0
Otu00778	0	0	0	0	0
Otu00779	0	0	0	0	0
Otu00780	0	0	0	0	0
Otu00781	0	0	0	0	0
Otu00782	0	0	0	0	0
Otu00783	0	0	0	0	0
Otu00784	2	0	1	0	0
Otu00785	0	0	0	0	0
Otu00786	0	0	0	0	0
Otu00787	0	0	6	0	0
Otu00788	0	0	0	0	0
Otu00789	0	0	0	0	0
Otu00790	0	0	0	0	0
Otu00791	0	0	0	0	0
Otu00792	0	0	0	0	0
Otu00793	0	0	0	0	0
Otu00794	0	0	0	0	0
Otu00795	0	0	0	0	0
Otu00796	0	0	1	0	0
Otu00797	0	0	0	0	0
Otu00798	2	0	2	0	0
Otu00799	0	0	0	0	0
Otu00800	0	0	0	0	0
Otu00801	0	0	0	0	0
Otu00802	0	0	0	0	0
Otu00803	0	0	0	0	0
Otu00804	0	1	2	1	0
Otu00805	0	0	0	0	0
Otu00806	2	0	2	0	0
Otu00807	0	1	8	0	0
Otu00808	0	0	1	0	0
Otu00809	0	0	2	0	0
Otu00810	0	0	0	0	0
Otu00811	0	2	0	0	0
Otu00812	0	0	0	0	0
Otu00813	0	0	0	0	0
Otu00814	0	0	0	0	0
Otu00815	0	0	0	0	0
Otu00816	0	0	4	0	0
Otu00817	0	0	0	0	0
Otu00818	0	0	0	0	0
Otu00819	0	1	1	0	0
Otu00820	0	0	3	0	0
Otu00821	0	0	0	0	0
Otu00822	0	0	0	0	0
Otu00823	1	3	2	0	1
Otu00824	0	0	0	0	0
Otu00825	2	1	2	0	0
Otu00826	0	0	0	0	0
Otu00827	0	0	0	0	0
Otu00828	0	0	0	0	0
Otu00829	0	0	0	0	0
Otu00830	0	0	6	0	0
Otu00831	0	0	0	0	0
Otu00832	0	0	0	0	1
Otu00833	0	0	0	0	0
Otu00834	0	0	0	0	0
Otu00835	0	0	0	0	0
Otu00836	0	0	0	0	0
Otu00837	2	0	0	0	0
Otu00838	0	1	0	0	0
Otu00839	0	0	0	0	0
Otu00840	0	0	0	0	0
Otu00841	0	1	2	0	0
Otu00842	0	0	0	0	0
Otu00843	0	0	0	0	0
Otu00844	0	0	0	0	0
Otu00845	0	0	0	0	0
Otu00846	0	0	0	0	0
Otu00847	0	0	0	0	0
Otu00848	0	0	0	0	0
Otu00849	0	0	0	0	0
Otu00850	0	2	1	0	0
Otu00851	0	0	0	0	0
Otu00852	0	0	0	0	0
Otu00853	0	0	0	0	0
Otu00854	2	1	0	0	1
Otu00855	0	0	0	0	0
Otu00856	0	0	0	0	0
Otu00857	0	0	0	0	0
Otu00858	0	0	0	0	0
Otu00859	0	0	0	0	0
Otu00860	0	0	0	0	0
Otu00861	0	0	0	0	0
Otu00862	0	0	2	0	0
Otu00863	0	0	1	0	0
Otu00864	0	0	0	0	0
Otu00865	0	0	0	0	0
Otu00866	0	0	0	0	0
Otu00867	2	2	2	0	0
Otu00868	0	0	0	0	0
Otu00869	0	0	0	0	0
Otu00870	0	0	0	0	0
Otu00871	0	0	0	0	0
Otu00872	0	0	0	0	0
Otu00873	0	0	0	0	0
Otu00874	0	0	1	0	0
Otu00875	1	0	1	0	0
Otu00876	0	1	0	0	0
Otu00877	0	0	1	0	0
Otu00878	0	0	0	0	0
Otu00879	1	0	0	0	0
Otu00880	0	0	0	0	0
Otu00881	0	0	0	0	0
Otu00882	0	0	0	0	0
Otu00883	0	0	0	0	0
Otu00884	0	0	0	0	0
Otu00885	0	0	12	0	0
Otu00886	0	0	1	0	0
Otu00887	0	0	0	0	0
Otu00888	0	1	0	0	0
Otu00889	0	0	0	0	0
Otu00890	1	0	0	0	0
Otu00891	0	0	0	0	0
Otu00892	0	0	0	0	0
Otu00893	0	0	0	0	0
Otu00894	0	0	0	0	0
Otu00895	0	1	0	0	0
Otu00896	0	0	0	0	0
Otu00897	1	1	0	0	0
Otu00898	0	0	0	0	0
Otu00899	0	0	8	0	0
Otu00900	6	0	0	0	0
Otu00901	0	0	0	0	0
Otu00902	0	0	0	0	0
Otu00903	0	0	0	0	0
Otu00904	0	0	0	0	0
Otu00905	0	0	0	0	0
Otu00906	0	0	0	0	0
Otu00907	0	1	2	0	0
Otu00908	0	0	3	0	0
Otu00909	2	1	0	0	0
Otu00910	0	0	0	0	0
Otu00911	0	0	0	0	0
Otu00912	0	0	0	0	0
Otu00913	1	2	0	0	0
Otu00914	0	0	0	0	0
Otu00915	0	0	0	0	0
Otu00916	0	0	0	0	0
Otu00917	0	0	0	0	0
Otu00918	0	0	0	0	0
Otu00919	0	0	1	0	0
Otu00920	0	0	0	0	0
Otu00921	0	0	0	0	0
Otu00922	0	0	1	0	1
Otu00923	0	0	0	0	0
Otu00924	0	0	1	0	0
Otu00925	0	0	0	0	0
Otu00926	2	0	2	0	0
Otu00927	0	0	0	0	0
Otu00928	0	0	0	0	0
Otu00929	0	0	1	0	0
Otu00930	0	0	0	0	0
Otu00931	0	0	0	0	0
Otu00932	0	0	0	0	0
Otu00933	0	0	0	0	0
Otu00934	0	0	0	0	0
Otu00935	0	0	0	0	0
Otu00936	0	0	0	0	0
Otu00937	0	0	0	0	0
Otu00938	3	0	1	0	0
Otu00939	0	0	0	0	0
Otu00940	0	0	0	0	0
Otu00941	0	0	0	0	0
Otu00942	0	0	0	0	0
Otu00943	0	0	0	0	0
Otu00944	1	0	0	0	0
Otu00945	0	0	0	0	0
Otu00946	0	0	0	0	0
Otu00947	0	0	0	0	0
Otu00948	0	0	0	0	0
Otu00949	0	0	0	0	0
Otu00950	0	2	1	0	0
Otu00951	0	0	0	0	0
Otu00952	0	0	7	0	0
Otu00953	0	0	0	0	0
Otu00954	0	0	0	0	0
Otu00955	0	0	0	0	0
Otu00956	0	0	0	0	0
Otu00957	0	0	0	0	0
Otu00958	0	1	0	0	0
Otu00959	0	0	0	0	0
Otu00960	0	0	0	0	0
Otu00961	0	0	0	0	0
Otu00962	0	0	0	0	0
Otu00963	1	1	1	0	0
Otu00964	1	0	0	0	0
Otu00965	2	1	2	0	0
Otu00966	0	0	0	0	0
Otu00967	0	0	0	0	0
Otu00968	0	0	0	0	0
Otu00969	0	0	0	0	0
Otu00970	0	0	0	0	0
Otu00971	0	0	0	0	0
Otu00972	0	0	0	0	0
Otu00973	0	0	0	0	0
Otu00974	0	0	0	0	0
Otu00975	0	0	0	0	0
Otu00976	0	0	0	0	0
Otu00977	0	0	0	0	0
Otu00978	0	0	0	0	0
Otu00979	0	0	0	0	0
Otu00980	0	0	0	0	0
Otu00981	0	0	0	0	0
Otu00982	0	0	0	0	0
Otu00983	1	0	0	0	0
Otu00984	0	0	0	0	0
Otu00985	0	0	1	0	0
Otu00986	0	0	0	0	0
Otu00987	0	0	0	0	0
Otu00988	0	0	0	0	0
Otu00989	0	0	0	0	0
Otu00990	0	0	2	0	0
Otu00991	0	0	0	0	0
Otu00992	0	0	0	0	0
Otu00993	0	0	0	0	0
Otu00994	0	0	0	0	0
Otu00995	0	0	0	0	0
Otu00996	0	0	0	0	0
Otu00997	0	0	0	0	0
Otu00998	0	0	0	0	0
Otu00999	0	0	0	0	0
Otu01000	0	0	0	0	0
Otu01001	0	1	0	0	0
Otu01002	0	0	0	0	0
Otu01003	0	0	0	0	0
Otu01004	0	0	0	0	0
Otu01005	0	0	2	0	0
Otu01006	0	0	14	0	0
Otu01007	0	0	0	0	0
Otu01008	0	0	0	0	0
Otu01009	0	0	0	0	0
Otu01010	0	0	0	0	0
Otu01011	0	0	0	0	0
Otu01012	1	0	0	0	0
Otu01013	1	0	0	1	0
Otu01014	0	0	0	0	0
Otu01015	0	0	0	0	0
Otu01016	0	0	0	0	0
Otu01017	0	0	0	0	0
Otu01018	0	0	1	0	0
Otu01019	2	0	0	0	0
Otu01020	0	0	0	0	0
Otu01021	5	0	0	0	0
Otu01022	0	0	0	0	0
Otu01023	0	0	0	0	0
Otu01024	1	0	0	0	0
Otu01025	0	0	0	0	0
Otu01026	0	0	0	0	0
Otu01027	0	0	0	0	0
Otu01028	1	0	1	0	0
Otu01029	2	1	2	0	1
Otu01030	0	0	0	0	0
Otu01031	0	0	0	0	0
Otu01032	0	0	0	0	0
Otu01033	0	0	1	0	0
Otu01034	0	0	0	2	0
Otu01035	0	0	0	0	0
Otu01036	0	0	0	0	0
Otu01037	0	0	0	0	0
Otu01038	0	0	0	0	0
Otu01039	0	0	0	0	0
Otu01040	1	0	1	0	0
Otu01041	0	0	0	0	0
Otu01042	0	0	0	0	0
Otu01043	0	0	0	0	0
Otu01044	0	1	0	0	0
Otu01045	0	0	2	0	0
Otu01046	0	0	0	0	0
Otu01047	0	0	0	0	0
Otu01048	0	0	0	0	0
Otu01049	0	0	0	0	0
Otu01050	0	0	0	0	0
Otu01051	0	0	0	0	0
Otu01052	0	0	0	0	0
Otu01053	0	0	0	0	0
Otu01054	0	13	0	0	0
Otu01055	0	0	0	0	0
Otu01056	0	10	0	0	0
Otu01057	0	0	0	0	0
Otu01058	0	0	0	0	0
Otu01059	2	1	0	0	0
Otu01060	0	0	0	0	0
Otu01061	0	0	0	0	0
Otu01062	0	0	0	0	0
Otu01063	0	1	0	0	0
Otu01064	0	0	0	0	0
Otu01065	0	0	0	0	0
Otu01066	0	0	0	0	0
Otu01067	0	0	0	0	0
Otu01068	0	0	0	0	0
Otu01069	0	0	0	0	0
Otu01070	0	0	0	0	0
Otu01071	0	0	0	0	0
Otu01072	0	0	0	0	0
Otu01073	0	0	0	0	0
Otu01074	0	0	0	0	0
Otu01075	0	0	0	0	0
Otu01076	0	0	0	0	0
Otu01077	0	0	0	0	0
Otu01078	0	0	0	0	0
Otu01079	0	0	0	0	0
Otu01080	0	0	0	0	0
Otu01081	0	0	0	0	0
Otu01082	0	0	0	0	0
Otu01083	0	0	0	0	0
Otu01084	0	0	1	0	0
Otu01085	0	0	0	0	0
Otu01086	0	0	0	0	1
Otu01087	0	0	0	0	0
Otu01088	0	0	0	0	0
Otu01089	0	0	0	0	0
Otu01090	2	0	0	1	0
Otu01091	0	0	0	0	0
Otu01092	0	0	0	0	0
Otu01093	8	0	0	0	0
Otu01094	0	0	0	0	0
Otu01095	0	0	0	0	0
Otu01096	0	0	0	0	0
Otu01097	0	0	0	0	0
Otu01098	0	0	0	0	0
Otu01099	0	0	0	0	1
Otu01100	0	0	0	0	3
Otu01101	1	1	0	4	0
Otu01102	0	0	0	0	0
Otu01103	0	0	0	0	0
Otu01104	0	2	1	0	0
Otu01105	0	0	0	0	0
Otu01106	0	0	0	0	0
Otu01107	0	0	0	0	0
Otu01108	0	0	0	0	0
Otu01109	0	0	0	0	0
Otu01110	0	0	0	0	0
Otu01111	0	0	0	0	0
Otu01112	0	0	0	0	0
Otu01113	0	0	0	0	0
Otu01114	0	2	0	0	0
Otu01115	0	0	0	0	0
Otu01116	0	1	2	0	0
Otu01117	0	0	0	0	0
Otu01118	0	0	0	0	0
Otu01119	0	0	0	0	0
Otu01120	0	0	0	0	0
Otu01121	0	0	0	0	0
Otu01122	8	0	0	0	0
Otu01123	0	0	0	0	0
Otu01124	0	0	0	0	0
Otu01125	0	0	0	0	0
Otu01126	0	0	0	0	0
Otu01127	0	0	0	0	0
Otu01128	0	0	0	0	1
Otu01129	0	0	0	0	0
Otu01130	0	0	0	0	0
Otu01131	1	0	0	0	0
Otu01132	0	0	0	0	0
Otu01133	0	0	4	0	0
Otu01134	0	0	0	0	0
Otu01135	0	0	0	0	0
Otu01136	4	6	0	0	0
Otu01137	0	0	0	0	0
Otu01138	0	0	0	0	0
Otu01139	0	0	0	0	0
Otu01140	0	0	0	0	0
Otu01141	0	0	0	0	0
Otu01142	0	0	0	0	0
Otu01143	1	1	0	0	0
Otu01144	0	0	3	0	0
Otu01145	0	0	0	0	0
Otu01146	0	0	0	0	0
Otu01147	1	0	0	0	0
Otu01148	0	0	0	0	0
Otu01149	0	1	1	0	0
Otu01150	0	0	0	0	0
Otu01151	0	0	0	0	0
Otu01152	0	0	0	0	0
Otu01153	0	0	0	0	0
Otu01154	0	0	0	0	10
Otu01155	0	0	0	0	0
Otu01156	0	0	0	0	0
Otu01157	0	0	1	0	0
Otu01158	0	0	0	0	0
Otu01159	0	0	0	0	0
Otu01160	0	0	0	0	0
Otu01161	0	1	1	0	0
Otu01162	0	0	0	0	0
Otu01163	0	0	0	0	0
Otu01164	1	0	0	0	0
Otu01165	0	0	0	0	0
Otu01166	0	0	0	0	0
Otu01167	0	0	0	0	0
Otu01168	0	0	0	0	0
Otu01169	0	0	2	0	0
Otu01170	0	0	0	0	0
Otu01171	0	0	0	0	0
Otu01172	1	0	0	0	0
Otu01173	3	0	0	0	0
Otu01174	0	0	0	0	0
Otu01175	0	0	0	0	0
Otu01176	0	0	0	0	0
Otu01177	0	0	0	0	0
Otu01178	0	0	0	0	0
Otu01179	0	0	0	0	0
Otu01180	0	0	1	0	0
Otu01181	0	1	1	0	0
Otu01182	0	0	0	0	0
Otu01183	0	0	0	0	0
Otu01184	1	0	1	0	0
Otu01185	4	0	0	0	0
Otu01186	0	0	0	0	0
Otu01187	0	0	0	0	0
Otu01188	0	0	0	0	0
Otu01189	0	0	0	0	0
Otu01190	0	0	0	0	0
Otu01191	1	2	0	0	0
Otu01192	0	9	0	0	0
Otu01193	0	0	0	0	0
Otu01194	0	0	0	0	0
Otu01195	0	0	0	0	0
Otu01196	0	0	0	0	0
Otu01197	0	0	2	0	0
Otu01198	0	0	0	0	0
Otu01199	0	0	0	0	0
Otu01200	0	0	0	0	0
Otu01201	0	0	0	0	0
Otu01202	0	0	0	0	0
Otu01203	0	0	0	0	0
Otu01204	0	0	0	0	0
Otu01205	0	0	0	0	0
Otu01206	0	0	0	0	0
Otu01207	0	0	0	0	0
Otu01208	0	1	0	0	0
Otu01209	0	0	0	0	0
Otu01210	0	0	0	0	0
Otu01211	0	0	0	0	0
Otu01212	0	1	0	0	0
Otu01213	0	0	0	0	0
Otu01214	0	0	0	0	0
Otu01215	0	0	0	0	0
Otu01216	0	0	0	0	0
Otu01217	0	0	0	0	0
Otu01218	0	1	0	0	0
Otu01219	0	0	1	0	0
Otu01220	0	0	0	0	0
Otu01221	0	10	0	0	0
Otu01222	0	0	0	0	0
Otu01223	0	0	0	0	0
Otu01224	0	0	0	0	0
Otu01225	0	0	0	0	0
Otu01226	0	0	0	0	0
Otu01227	0	0	0	0	0
Otu01228	0	0	0	0	0
Otu01229	0	0	0	0	0
Otu01230	0	0	0	0	0
Otu01231	0	0	0	0	0
Otu01232	0	0	3	0	0
Otu01233	0	0	0	0	0
Otu01234	0	0	0	0	0
Otu01235	0	0	0	0	0
Otu01236	0	0	0	0	0
Otu01237	0	0	0	0	0
Otu01238	0	0	0	0	0
Otu01239	0	0	0	0	0
Otu01240	0	0	0	0	0
Otu01241	0	0	0	0	0
Otu01242	1	0	0	0	0
Otu01243	0	0	0	0	0
Otu01244	0	0	0	0	0
Otu01245	0	0	0	0	0
Otu01246	0	0	2	0	0
Otu01247	0	0	0	0	0
Otu01248	0	0	0	0	0
Otu01249	0	0	0	0	0
Otu01250	0	0	0	0	0
Otu01251	0	0	0	0	0
Otu01252	0	0	0	0	0
Otu01253	0	0	0	0	0
Otu01254	0	0	0	0	0
Otu01255	0	0	1	0	0
Otu01256	0	0	0	0	0
Otu01257	0	0	0	0	0
Otu01258	0	0	0	0	8
Otu01259	0	0	0	0	0
Otu01260	0	0	0	0	0
Otu01261	0	0	0	0	0
Otu01262	0	0	0	0	0
Otu01263	0	0	0	0	0
Otu01264	0	0	0	0	0
Otu01265	0	0	0	0	0
Otu01266	0	0	0	0	0
Otu01267	0	0	0	0	0
Otu01268	0	1	1	0	0
Otu01269	0	0	0	0	0
Otu01270	0	0	0	0	0
Otu01271	0	0	0	0	0
Otu01272	1	0	1	0	0
Otu01273	0	0	0	0	1
Otu01274	0	0	0	0	0
Otu01275	0	0	0	0	2
Otu01276	0	0	0	0	0
Otu01277	0	0	0	0	0
Otu01278	0	0	0	0	0
Otu01279	0	0	0	0	0
Otu01280	1	0	0	0	0
Otu01281	0	0	0	0	0
Otu01282	0	0	3	0	0
Otu01283	0	0	0	0	0
Otu01284	0	0	0	0	0
Otu01285	0	0	0	0	0
Otu01286	0	0	0	0	0
Otu01287	0	0	0	0	0
Otu01288	0	0	0	0	0
Otu01289	0	1	2	0	0
Otu01290	0	0	0	0	0
Otu01291	0	0	0	0	0
Otu01292	0	0	0	0	0
Otu01293	0	0	0	0	0
Otu01294	4	0	0	0	0
Otu01295	0	0	0	0	0
Otu01296	0	0	0	0	0
Otu01297	0	2	0	0	0
Otu01298	1	0	0	0	0
Otu01299	0	0	0	0	0
Otu01300	0	0	0	0	0
Otu01301	0	0	0	0	0
Otu01302	0	0	0	0	0
Otu01303	0	2	0	0	1
Otu01304	0	0	0	0	0
Otu01305	0	0	0	0	0
Otu01306	0	0	1	0	0
Otu01307	0	0	0	0	0
Otu01308	0	1	0	0	0
Otu01309	0	0	0	0	0
Otu01310	0	0	0	0	0
Otu01311	0	0	0	0	0
Otu01312	0	0	0	0	0
Otu01313	0	0	0	0	0
Otu01314	0	0	0	0	0
Otu01315	0	0	0	0	0
Otu01316	0	0	0	0	0
Otu01317	0	0	0	0	0
Otu01318	0	0	0	0	0
Otu01319	0	0	0	0	0
Otu01320	0	0	1	0	0
Otu01321	0	0	0	0	0
Otu01322	0	0	0	0	0
Otu01323	0	0	0	0	0
Otu01324	0	0	0	0	0
Otu01325	0	0	1	0	0
Otu01326	0	0	0	0	0
Otu01327	0	0	0	0	0
Otu01328	0	0	0	0	0
Otu01329	0	0	0	0	0
Otu01330	0	0	0	0	0
Otu01331	0	0	0	0	0
Otu01332	0	0	0	0	0
Otu01333	0	0	0	0	0
Otu01334	0	0	0	0	0
Otu01335	0	0	0	0	0
Otu01336	0	0	0	0	0
Otu01337	0	0	0	0	0
Otu01338	0	0	0	0	0
Otu01339	0	0	0	0	0
Otu01340	0	0	0	0	0
Otu01341	0	0	1	0	1
Otu01342	0	0	0	0	0
Otu01343	0	0	0	0	0
Otu01344	0	0	0	0	0
Otu01345	0	0	0	0	3
Otu01346	0	0	0	0	0
Otu01347	0	0	0	0	0
Otu01348	1	1	1	1	0
Otu01349	0	0	0	0	0
Otu01350	0	0	0	0	0
Otu01351	0	0	0	0	0
Otu01352	0	0	0	0	0
Otu01353	0	0	0	0	0
Otu01354	0	0	2	0	0
Otu01355	0	0	0	0	0
Otu01356	0	0	0	0	0
Otu01357	0	0	0	0	0
Otu01358	0	0	0	0	0
Otu01359	0	0	0	0	0
Otu01360	0	0	0	0	0
Otu01361	0	9	0	0	0
Otu01362	0	0	0	0	0
Otu01363	0	0	0	0	0
Otu01364	0	0	2	0	0
Otu01365	0	0	0	0	0
Otu01366	0	0	0	0	0
Otu01367	0	0	0	0	0
Otu01368	0	0	0	0	1
Otu01369	0	0	0	0	0
Otu01370	0	0	0	0	0
Otu01371	0	0	0	0	0
Otu01372	0	0	0	0	0
Otu01373	0	0	0	0	0
Otu01374	0	0	0	0	0
Otu01375	0	0	0	0	0
Otu01376	0	0	0	0	0
Otu01377	0	0	0	0	0
Otu01378	0	0	1	0	1
Otu01379	0	0	0	0	0
Otu01380	0	0	0	0	0
Otu01381	6	0	0	0	0
Otu01382	0	0	0	0	0
Otu01383	0	0	0	0	0
Otu01384	0	0	0	0	0
Otu01385	0	0	0	0	0
Otu01386	0	0	0	0	0
Otu01387	0	0	0	0	0
Otu01388	0	0	0	0	0
Otu01389	0	0	0	0	0
Otu01390	0	0	0	0	0
Otu01391	0	0	0	0	1
Otu01392	0	0	1	0	0
Otu01393	0	0	0	0	0
Otu01394	4	0	0	0	0
Otu01395	0	0	0	0	0
Otu01396	0	0	0	0	0
Otu01397	0	0	0	0	0
Otu01398	0	0	0	0	0
Otu01399	0	0	0	0	0
Otu01400	0	0	0	0	8
Otu01401	0	0	0	0	0
Otu01402	0	0	0	0	0
Otu01403	0	0	0	0	0
Otu01404	0	0	0	0	0
Otu01405	2	0	1	0	0
Otu01406	0	0	0	0	0
Otu01407	0	0	0	0	0
Otu01408	0	0	0	0	0
Otu01409	0	0	0	0	0
Otu01410	0	0	0	0	0
Otu01411	0	0	0	0	0
Otu01412	0	0	0	0	0
Otu01413	0	0	0	0	0
Otu01414	0	0	0	0	0
Otu01415	0	0	0	0	0
Otu01416	0	0	0	0	0
Otu01417	0	0	0	0	0
Otu01418	0	0	0	0	0
Otu01419	0	0	0	0	0
Otu01420	0	0	1	0	0
Otu01421	0	0	1	0	0
Otu01422	0	1	0	0	0
Otu01423	0	0	0	0	0
Otu01424	0	0	0	0	0
Otu01425	0	0	0	0	0
Otu01426	0	0	0	0	0
Otu01427	1	2	0	0	0
Otu01428	0	0	0	0	0
Otu01429	0	0	8	0	0
Otu01430	0	0	0	0	0
Otu01431	0	0	0	0	0
Otu01432	0	0	2	0	0
Otu01433	0	0	0	0	0
Otu01434	0	0	1	0	0
Otu01435	0	0	0	0	0
Otu01436	1	0	0	0	0
Otu01437	0	0	0	0	0
Otu01438	0	0	0	0	0
Otu01439	1	0	0	0	0
Otu01440	0	0	0	0	0
Otu01441	0	0	0	0	0
Otu01442	0	0	0	0	0
Otu01443	0	0	0	0	0
Otu01444	1	1	4	0	0
Otu01445	0	0	0	0	0
Otu01446	0	0	0	0	0
Otu01447	0	0	0	0	0
Otu01448	0	0	0	0	0
Otu01449	0	1	0	0	0
Otu01450	0	0	0	0	0
Otu01451	0	0	0	0	0
Otu01452	0	0	0	0	0
Otu01453	0	0	0	0	0
Otu01454	0	0	0	0	0
Otu01455	0	0	0	0	0
Otu01456	0	0	1	0	0
Otu01457	0	0	0	0	0
Otu01458	0	0	0	0	0
Otu01459	0	0	0	0	0
Otu01460	0	0	0	0	0
Otu01461	0	0	2	0	0
Otu01462	0	0	0	0	0
Otu01463	0	0	0	0	0
Otu01464	0	0	0	0	0
Otu01465	0	0	0	0	0
Otu01466	0	0	0	0	0
Otu01467	0	0	0	0	0
Otu01468	0	0	0	0	0
Otu01469	0	0	0	0	0
Otu01470	0	0	0	0	0
Otu01471	0	1	7	0	0
Otu01472	0	0	0	0	0
Otu01473	0	0	0	0	0
Otu01474	0	1	2	0	0
Otu01475	0	0	0	0	0
Otu01476	0	1	0	0	6
Otu01477	0	0	0	0	0
Otu01478	0	0	0	0	0
Otu01479	0	0	0	0	0
Otu01480	0	0	0	0	0
Otu01481	0	0	0	0	0
Otu01482	0	0	0	0	0
Otu01483	0	0	0	0	0
Otu01484	0	0	0	0	0
Otu01485	0	0	0	0	0
Otu01486	0	0	0	0	0
Otu01487	0	0	0	0	0
Otu01488	0	0	0	0	0
Otu01489	0	0	0	0	0
Otu01490	0	0	0	0	0
Otu01491	0	0	0	0	0
Otu01492	0	0	0	0	0
Otu01493	0	0	0	0	0
Otu01494	0	6	0	0	0
Otu01495	0	0	0	0	0
Otu01496	0	0	0	0	0
Otu01497	0	0	0	0	0
Otu01498	0	0	0	0	0
Otu01499	0	0	0	0	0
Otu01500	0	0	1	0	0
Otu01501	0	0	0	0	0
Otu01502	0	0	0	0	0
Otu01503	0	0	5	0	0
Otu01504	0	0	0	0	0
Otu01505	0	0	0	0	0
Otu01506	0	0	0	0	0
Otu01507	0	0	0	0	0
Otu01508	0	0	0	0	0
Otu01509	0	0	0	0	0
Otu01510	0	0	0	0	0
Otu01511	0	0	0	0	0
Otu01512	0	0	0	0	0
Otu01513	0	0	0	0	0
Otu01514	0	0	0	0	0
Otu01515	0	0	0	0	0
Otu01516	0	0	0	0	0
Otu01517	0	0	0	0	0
Otu01518	0	0	0	0	0
Otu01519	0	0	0	0	0
Otu01520	0	0	0	0	0
Otu01521	0	0	0	0	0
Otu01522	0	0	0	0	0
Otu01523	0	0	0	0	0
Otu01524	0	0	1	0	0
Otu01525	0	0	1	0	0
Otu01526	0	0	0	0	0
Otu01527	0	0	2	0	0
Otu01528	1	0	0	0	0
Otu01529	0	0	0	0	0
Otu01530	1	0	0	0	0
Otu01531	7	0	0	0	0
Otu01532	0	1	2	0	1
Otu01533	0	0	0	0	0
Otu01534	0	0	0	0	0
Otu01535	0	0	0	0	0
Otu01536	0	0	0	0	0
Otu01537	0	0	0	0	0
Otu01538	0	0	0	0	0
Otu01539	0	0	0	0	0
Otu01540	0	0	0	0	0
Otu01541	0	0	0	0	0
Otu01542	0	0	0	0	0
Otu01543	0	0	0	0	0
Otu01544	0	0	0	0	0
Otu01545	0	0	0	0	0
Otu01546	0	0	0	0	0
Otu01547	1	0	1	0	0
Otu01548	0	0	0	0	0
Otu01549	0	0	0	0	0
Otu01550	0	0	0	0	0
Otu01551	0	0	0	0	0
Otu01552	0	0	0	0	0
Otu01553	0	0	0	0	0
Otu01554	0	2	0	0	1
Otu01555	0	0	0	0	0
Otu01556	0	0	0	0	0
Otu01557	0	0	0	0	0
Otu01558	1	0	0	0	0
Otu01559	0	0	0	0	0
Otu01560	0	0	0	0	0
Otu01561	0	0	0	0	0
Otu01562	0	0	0	0	0
Otu01563	0	0	0	0	0
Otu01564	0	0	0	0	0
Otu01565	0	0	0	0	0
Otu01566	0	0	0	0	0
Otu01567	1	0	0	0	0
Otu01568	0	0	0	0	0
Otu01569	0	1	1	0	0
Otu01570	0	0	0	0	0
Otu01571	0	0	0	0	0
Otu01572	0	0	0	0	0
Otu01573	0	0	2	0	0
Otu01574	0	0	0	0	0
Otu01575	0	0	0	0	0
Otu01576	0	0	0	0	0
Otu01577	0	0	0	0	0
Otu01578	0	0	0	0	0
Otu01579	0	0	0	0	0
Otu01580	1	0	0	0	0
Otu01581	0	0	0	0	0
Otu01582	0	0	0	0	0
Otu01583	0	0	0	0	0
Otu01584	0	0	0	0	0
Otu01585	0	0	0	0	0
Otu01586	0	0	0	0	0
Otu01587	0	0	0	0	0
Otu01588	0	0	0	0	0
Otu01589	0	0	0	0	0
Otu01590	0	0	0	0	0
Otu01591	0	0	1	1	0
Otu01592	0	0	0	0	0
Otu01593	0	0	0	1	0
Otu01594	0	0	0	0	0
Otu01595	0	0	0	0	0
Otu01596	0	0	0	0	0
Otu01597	0	0	0	0	0
Otu01598	0	0	0	0	0
Otu01599	0	0	0	0	0
Otu01600	0	0	0	0	0
Otu01601	0	0	0	0	0
Otu01602	0	0	0	0	0
Otu01603	0	0	0	0	0
Otu01604	0	0	0	0	0
Otu01605	0	0	0	0	0
Otu01606	0	0	0	0	0
Otu01607	0	0	0	0	0
Otu01608	0	0	0	0	0
Otu01609	0	0	0	0	0
Otu01610	0	0	0	0	0
Otu01611	0	0	0	0	0
Otu01612	0	0	0	0	0
Otu01613	2	0	1	0	0
Otu01614	0	0	0	0	0
Otu01615	0	0	0	0	0
Otu01616	0	0	0	0	0
Otu01617	3	0	0	0	0
Otu01618	0	0	0	0	0
Otu01619	0	0	0	0	0
Otu01620	0	0	0	0	0
Otu01621	0	0	2	0	0
Otu01622	0	0	0	0	0
Otu01623	0	1	4	0	0
Otu01624	0	0	0	0	0
Otu01625	0	0	0	0	0
Otu01626	0	0	0	0	0
Otu01627	0	0	0	0	0
Otu01628	0	0	0	0	0
Otu01629	0	0	0	0	0
Otu01630	0	0	0	0	0
Otu01631	0	0	0	0	0
Otu01632	1	0	0	0	0
Otu01633	0	0	0	0	0
Otu01634	0	0	0	0	0
Otu01635	0	0	0	0	0
Otu01636	0	0	1	0	0
Otu01637	0	0	0	0	0
Otu01638	0	0	0	0	0
Otu01639	0	0	0	0	0
Otu01640	0	0	0	0	0
Otu01641	0	0	0	0	0
Otu01642	0	0	0	0	0
Otu01643	0	0	0	0	0
Otu01644	0	0	0	0	0
Otu01645	0	0	0	0	0
Otu01646	0	0	0	0	0
Otu01647	0	0	0	0	0
Otu01648	1	0	0	0	0
Otu01649	0	0	0	0	0
Otu01650	0	0	3	0	0
Otu01651	0	0	0	0	0
Otu01652	0	0	0	0	0
Otu01653	0	0	0	0	0
Otu01654	0	0	3	0	0
Otu01655	0	0	0	0	0
Otu01656	0	0	0	0	0
Otu01657	0	0	0	0	0
Otu01658	1	0	0	0	0
Otu01659	0	0	0	0	0
Otu01660	0	6	0	0	0
Otu01661	0	0	0	0	0
Otu01662	0	0	0	0	0
Otu01663	0	0	0	0	0
Otu01664	0	0	0	0	0
Otu01665	0	0	0	0	0
Otu01666	0	0	0	0	0
Otu01667	0	0	1	0	0
Otu01668	0	0	0	0	0
Otu01669	0	0	0	0	0
Otu01670	0	0	0	0	0
Otu01671	0	0	0	0	0
Otu01672	0	0	0	0	0
Otu01673	0	0	0	0	0
Otu01674	0	0	0	0	0
Otu01675	0	0	0	0	0
Otu01676	0	0	0	0	0
Otu01677	0	0	1	0	0
Otu01678	0	0	0	0	0
Otu01679	0	0	0	0	0
Otu01680	0	0	0	0	0
Otu01681	0	0	0	0	0
Otu01682	0	0	0	0	0
Otu01683	0	0	0	0	0
Otu01684	0	0	0	0	0
Otu01685	0	0	0	0	0
Otu01686	0	0	0	0	0
Otu01687	0	1	1	0	0
Otu01688	0	0	0	0	0
Otu01689	0	0	0	0	0
Otu01690	0	0	0	0	1
Otu01691	0	0	0	0	0
Otu01692	0	0	0	0	0
Otu01693	0	0	0	0	0
Otu01694	0	0	0	0	0
Otu01695	0	1	0	0	0
Otu01696	0	0	0	0	0
Otu01697	0	0	0	0	0
Otu01698	0	0	0	0	0
Otu01699	0	0	0	0	0
Otu01700	0	0	0	0	0
Otu01701	0	0	0	0	0
Otu01702	0	0	2	0	0
Otu01703	0	0	0	0	0
Otu01704	0	0	0	0	0
Otu01705	0	0	0	0	0
Otu01706	0	0	0	0	0
Otu01707	0	0	1	0	0
Otu01708	0	0	0	0	0
Otu01709	0	0	0	0	0
Otu01710	1	0	0	0	0
Otu01711	1	0	0	0	0
Otu01712	0	0	0	0	0
Otu01713	0	0	0	0	0
Otu01714	0	0	0	0	0
Otu01715	0	0	0	0	0
Otu01716	0	0	1	0	0
Otu01717	0	0	0	0	0
Otu01718	0	0	0	0	0
Otu01719	0	0	1	0	0
Otu01720	0	0	0	0	0
Otu01721	0	0	0	0	0
Otu01722	0	0	0	0	0
Otu01723	0	0	0	0	0
Otu01724	0	0	0	0	0
Otu01725	0	0	2	0	0
Otu01726	0	0	0	0	0
Otu01727	3	1	0	0	0
Otu01728	0	0	0	0	0
Otu01729	0	0	0	0	0
Otu01730	0	0	0	0	0
Otu01731	0	0	0	0	0
Otu01732	0	0	0	0	0
Otu01733	0	0	0	0	0
Otu01734	0	0	0	0	0
Otu01735	0	0	0	0	0
Otu01736	0	0	1	0	0
Otu01737	0	0	0	0	0
Otu01738	0	0	0	0	0
Otu01739	0	0	0	0	0
Otu01740	0	0	0	0	0
Otu01741	0	0	0	0	0
Otu01742	0	0	0	0	0
Otu01743	0	0	0	0	0
Otu01744	0	0	0	0	0
Otu01745	0	0	0	0	0
Otu01746	0	0	1	0	0
Otu01747	0	0	0	0	0
Otu01748	0	0	0	0	0
Otu01749	0	0	0	0	0
Otu01750	0	0	0	0	0
Otu01751	0	0	0	0	0
Otu01752	0	0	0	0	0
Otu01753	0	0	0	0	0
Otu01754	0	0	0	0	0
Otu01755	0	0	0	0	0
Otu01756	0	0	0	0	0
Otu01757	0	0	0	0	0
Otu01758	0	0	0	0	0
Otu01759	0	0	0	0	0
Otu01760	0	0	0	0	0
Otu01761	0	0	0	0	0
Otu01762	2	0	0	0	0
Otu01763	0	0	1	0	0
Otu01764	0	0	0	0	0
Otu01765	0	0	0	0	0
Otu01766	0	0	0	0	0
Otu01767	0	0	0	0	0
Otu01768	0	0	0	0	0
Otu01769	0	0	0	0	0
Otu01770	0	0	1	0	0
Otu01771	0	0	0	0	0
Otu01772	0	0	0	0	0
Otu01773	0	0	0	0	0
Otu01774	0	0	0	0	0
Otu01775	0	0	0	0	0
Otu01776	0	0	0	0	0
Otu01777	0	0	1	0	0
Otu01778	0	0	0	0	0
Otu01779	0	0	1	0	0
Otu01780	0	0	0	0	0
Otu01781	0	0	1	0	0
Otu01782	0	0	0	0	6
Otu01783	0	0	0	0	0
Otu01784	0	0	0	0	0
Otu01785	0	0	0	0	0
Otu01786	0	0	0	0	0
Otu01787	0	0	0	0	0
Otu01788	0	0	0	0	0
Otu01789	0	0	0	0	0
Otu01790	0	0	0	0	0
Otu01791	0	0	0	0	0
Otu01792	0	0	0	0	0
Otu01793	0	0	0	0	0
Otu01794	0	1	1	0	0
Otu01795	0	0	0	0	0
Otu01796	6	0	0	0	0
Otu01797	0	0	0	0	0
Otu01798	0	0	0	0	0
Otu01799	0	0	0	0	0
Otu01800	1	0	0	0	0
Otu01801	0	0	0	0	0
Otu01802	0	0	0	0	0
Otu01803	0	0	0	0	0
Otu01804	0	0	0	0	0
Otu01805	0	0	0	0	0
Otu01806	0	0	0	0	0
Otu01807	0	0	0	0	0
Otu01808	0	0	0	0	0
Otu01809	0	0	0	0	0
Otu01810	0	0	0	0	0
Otu01811	0	0	0	0	0
Otu01812	0	0	0	0	0
Otu01813	1	0	0	0	0
Otu01814	0	0	0	0	0
Otu01815	1	0	1	0	0
Otu01816	0	0	0	0	0
Otu01817	0	0	0	0	0
Otu01818	0	0	0	0	0
Otu01819	0	0	0	0	0
Otu01820	0	0	0	0	0
Otu01821	0	0	3	0	0
Otu01822	0	6	0	0	0
Otu01823	0	0	0	0	0
Otu01824	0	0	0	0	0
Otu01825	0	0	0	0	0
Otu01826	0	0	0	0	0
Otu01827	0	0	0	0	0
Otu01828	0	0	0	0	0
Otu01829	0	0	0	0	0
Otu01830	0	0	0	0	0
Otu01831	0	0	0	0	0
Otu01832	0	0	0	0	0
Otu01833	0	0	0	0	0
Otu01834	0	0	0	0	0
Otu01835	0	0	0	0	0
Otu01836	0	0	0	0	0
Otu01837	0	0	0	0	0
Otu01838	0	0	0	0	0
Otu01839	0	0	0	0	0
Otu01840	0	0	0	0	0
Otu01841	0	0	0	0	0
Otu01842	5	0	0	0	0
Otu01843	0	0	0	0	0
Otu01844	0	0	0	0	0
Otu01845	0	0	0	0	0
Otu01846	0	0	0	0	0
Otu01847	0	0	0	0	0
Otu01848	0	1	1	0	0
Otu01849	0	0	0	0	0
Otu01850	0	0	0	0	0
Otu01851	0	0	0	0	0
Otu01852	0	0	0	0	0
Otu01853	0	0	0	0	0
Otu01854	0	0	0	0	0
Otu01855	0	0	0	0	0
Otu01856	0	0	0	0	0
Otu01857	0	0	0	0	0
Otu01858	0	0	0	0	0
Otu01859	0	0	0	0	0
Otu01860	3	2	0	0	0
Otu01861	0	0	0	0	0
Otu01862	0	0	0	0	0
Otu01863	0	0	0	0	0
Otu01864	0	0	2	0	0
Otu01865	0	0	0	0	0
Otu01866	0	0	1	0	0
Otu01867	0	0	0	0	0
Otu01868	0	0	0	0	0
Otu01869	0	0	0	0	0
Otu01870	0	0	0	0	0
Otu01871	0	0	0	0	0
Otu01872	0	0	0	0	0
Otu01873	0	0	0	0	0
Otu01874	0	0	0	0	0
Otu01875	0	0	1	0	0
Otu01876	0	0	0	0	0
Otu01877	0	0	0	0	0
Otu01878	0	0	0	0	0
Otu01879	0	0	0	0	0
Otu01880	0	0	0	0	0
Otu01881	0	0	0	0	0
Otu01882	0	0	0	0	0
Otu01883	0	0	0	0	0
Otu01884	0	0	0	0	0
Otu01885	0	0	0	0	0
Otu01886	0	0	0	0	0
Otu01887	0	0	0	0	0
Otu01888	0	0	0	0	0
Otu01889	0	0	0	0	0
Otu01890	0	0	0	0	0
Otu01891	0	0	1	0	1
Otu01892	0	0	0	0	0
Otu01893	0	0	0	0	0
Otu01894	0	0	0	0	0
Otu01895	0	0	0	0	0
Otu01896	0	0	0	0	0
Otu01897	0	0	0	0	0
Otu01898	0	0	0	0	0
Otu01899	0	0	0	0	0
Otu01900	0	0	0	0	0
Otu01901	0	0	0	0	0
Otu01902	0	0	0	0	0
Otu01903	0	0	0	0	0
Otu01904	0	0	0	0	0
Otu01905	0	0	0	0	0
Otu01906	0	0	0	0	0
Otu01907	0	0	0	0	0
Otu01908	0	0	0	0	0
Otu01909	0	0	0	0	0
Otu01910	0	0	0	0	0
Otu01911	0	0	0	0	0
Otu01912	0	0	0	0	0
Otu01913	0	0	0	0	0
Otu01914	0	0	0	0	0
Otu01915	0	0	0	0	0
Otu01916	0	0	0	0	0
Otu01917	0	0	0	0	0
Otu01918	0	0	0	0	0
Otu01919	0	0	0	0	0
Otu01920	0	0	0	0	0
Otu01921	0	0	0	0	0
Otu01922	0	1	0	0	0
Otu01923	0	0	0	0	0
Otu01924	0	0	0	1	0
Otu01925	0	1	0	0	0
Otu01926	0	0	0	0	5
Otu01927	0	0	0	0	0
Otu01928	0	0	0	0	0
Otu01929	0	0	0	0	0
Otu01930	0	0	0	0	0
Otu01931	0	0	0	0	0
Otu01932	0	0	0	0	0
Otu01933	0	0	0	0	0
Otu01934	0	0	0	0	0
Otu01935	0	0	0	0	0
Otu01936	0	0	0	0	0
Otu01937	0	0	0	0	0
Otu01938	0	0	0	0	0
Otu01939	0	0	0	0	0
Otu01940	0	0	0	0	0
Otu01941	0	0	0	0	0
Otu01942	0	0	0	0	0
Otu01943	0	0	0	0	0
Otu01944	0	0	0	0	0
Otu01945	0	0	0	0	0
Otu01946	0	0	0	0	0
Otu01947	0	0	0	0	0
Otu01948	0	0	0	0	0
Otu01949	0	0	0	0	0
Otu01950	0	0	0	0	0
Otu01951	0	0	0	0	0
Otu01952	0	0	0	0	0
Otu01953	0	0	0	0	0
Otu01954	0	0	0	0	0
Otu01955	0	0	0	0	0
Otu01956	0	0	0	0	0
Otu01957	0	0	1	0	0
Otu01958	0	0	0	0	0
Otu01959	0	0	0	0	0
Otu01960	0	0	0	0	0
Otu01961	0	0	0	0	0
Otu01962	0	0	0	0	0
Otu01963	0	0	0	0	0
Otu01964	0	0	1	0	0
Otu01965	0	0	0	0	0
Otu01966	0	0	0	0	0
Otu01967	0	0	0	0	0
Otu01968	0	0	0	0	0
Otu01969	0	0	0	0	0
Otu01970	0	0	0	0	0
Otu01971	4	0	0	0	0
Otu01972	0	0	0	0	0
Otu01973	1	0	0	0	0
Otu01974	0	0	0	0	0
Otu01975	0	0	0	0	0
Otu01976	0	0	0	0	0
Otu01977	0	0	1	0	0
Otu01978	0	0	0	0	0
Otu01979	0	0	0	0	0
Otu01980	0	0	1	0	0
Otu01981	1	0	0	0	0
Otu01982	0	0	0	0	0
Otu01983	0	0	0	0	0
Otu01984	0	0	0	0	0
Otu01985	0	0	0	0	0
Otu01986	0	0	0	0	0
Otu01987	0	0	0	0	0
Otu01988	0	0	0	0	0
Otu01989	0	0	0	0	0
Otu01990	0	0	0	0	0
Otu01991	0	0	1	0	0
Otu01992	0	0	0	0	0
Otu01993	0	0	0	0	0
Otu01994	0	0	0	0	0
Otu01995	0	0	0	0	0
Otu01996	0	0	0	0	0
Otu01997	0	0	0	0	0
Otu01998	0	0	0	0	0
Otu01999	0	0	0	0	0
[truncated: 7,687 more rows]

## Sheet: aurelia_qq
otu_id	Polypen_AaQQ1_1	Polypen_AaQQ1_2	Polypen_AaQQ1_3	Polypen_AaQQ1_4	Polypen_AaQQ1_5	Polypen_AaQQ1_6	Polypen_AaQQ2_1	Polypen_AaQQ2_2	Polypen_AaQQ2_3	Polypen_AaQQ2_4	Polypen_AaQQ2_5	Polypen_AaQQ2_6	Polypen_AaQQ3_1	Polypen_AaQQ3_2	Polypen_AaQQ3_3	Polypen_AaQQ3_4	Polypen_AaQQ3_5	Polypen_AaQQ3_6
Otu00001	30588	23321	40801	46219	22275	25722	17754	11897	51801	19552	34478	39609	12628	28095	25863	23328	46139	46286
Otu00002	36062	2980	8894	9269	119931	4277	816	532	2242	6192	1930	794	1726	382	2941	859	380	1470
Otu00003	19761	2060	21830	98	18795	27805	139322	8	3170	19640	340	72936	56	494	81183	24	112	9201
Otu00004	1	0	5	1	7	3	86	2	28	17	15	3	0	0	0	1	0	2
Otu00005	745	583	980	6083	1646	480	843	3187	833	544	432	321	296	1351	1148	1687	1936	736
Otu00006	6381	2907	5846	14506	2775	2526	3269	18681	4656	2584	5607	3443	2099	3596	2365	12181	16424	10090
Otu00007	225	2641	3323	16163	6912	1448	238	4190	3244	571	4054	699	1373	7159	2605	18868	16830	1549
Otu00008	1198	2132	2603	14515	1145	1816	917	16229	3067	2018	5657	1316	2076	2450	1802	15808	16308	7010
Otu00009	13	29	23	177	38	32	247	261	46	43	90	7	20	87	99	73	76	19
Otu00010	144	129	365	3735	338	181	160	2171	237	97	316	40	171	252	232	1207	1648	361
Otu00011	3483	1913	2052	6443	1995	1585	1679	9457	2334	1460	3075	2686	999	2640	1909	5483	4500	4000
Otu00012	191	506	2922	6964	3113	1780	97	604	1122	159	1836	746	799	3748	2487	3929	4322	1111
Otu00013	4136	1097	6787	1250	2206	4721	3633	13	5012	2496	1189	4980	171	805	5625	100	1139	5715
Otu00014	6	5	11	16	21	9	172	250	51	79	18	10	4	4	0	27	51	86
Otu00015	2553	1325	4003	3350	1220	2858	3418	524	4074	1807	1989	3095	642	1194	1682	1030	3302	4745
Otu00016	805	612	1446	5032	1498	1318	528	2720	1098	883	2652	710	664	1288	1245	5104	4101	2869
Otu00017	71	656	309	1198	191	420	204	12662	990	818	9336	179	918	5597	222	5379	537	344
Otu00018	943	467	1060	3280	622	1137	4672	3106	1271	3201	1484	1041	593	874	798	2156	3080	2598
Otu00019	69	65	139	1731	195	83	78	1117	121	54	142	27	101	103	119	609	893	156
Otu00020	3943	694	1830	116	2441	1115	3284	0	784	545	141	4227	10	101	3801	13	91	1485
Otu00021	127	413	322	1577	119	245	140	6905	666	310	828	184	713	416	158	6429	1925	845
Otu00022	526	1452	1119	2493	531	1326	645	786	2317	1068	2132	1585	804	1724	1382	1984	2858	1884
Otu00023	378	1059	917	723	659	1445	2109	536	1946	2199	9393	641	284	4960	1187	862	419	1924
Otu00024	1460	361	2393	517	884	2605	8662	12	1607	3909	571	1834	41	250	2370	46	328	3815
Otu00025	121	122	202	697	190	469	528	464	298	661	795	252	530	401	351	569	444	303
Otu00026	2187	477	1164	1615	784	414	1038	1702	739	374	1018	1074	334	585	589	1392	2322	2060
Otu00027	2253	557	2728	2506	849	1347	2061	306	1773	1854	923	1201	223	506	552	444	2224	2353
Otu00028	394	414	909	3020	368	526	525	825	950	493	973	1236	260	727	535	1589	2821	3175
Otu00029	11	226	17	1515	505	322	25	657	21	422	76	8	7	770	821	677	856	67
Otu00030	31	0	13	2	38	21	67	0	4	5	0	51	0	0	52	0	0	3
Otu00031	113	172	1200	1856	283	239	83	2496	149	406	358	106	200	2271	457	2109	634	151
Otu00032	297	182	453	2880	435	370	115	802	665	259	433	187	315	1406	816	804	1109	251
Otu00033	147	179	120	476	52	61	30	4118	148	45	344	98	50	151	29	1748	636	469
Otu00034	55	98	148	1157	122	202	10	1451	291	34	183	149	157	600	227	876	657	46
Otu00035	2	0	4	2	3	0	4	1	0	1	2	1	0	0	148	0	2	4
Otu00036	94	133	113	743	29	47	21	3522	142	58	215	99	66	122	86	2301	596	282
Otu00037	313	118	226	713	159	72	427	2000	135	167	557	175	181	176	88	1283	875	424
Otu00038	320	171	660	1257	326	808	460	140	470	702	686	478	127	401	597	551	895	1232
Otu00039	52	127	496	655	244	397	289	116	250	860	405	69	89	163	67	112	666	1019
Otu00040	73	64	58	287	40	19	36	1374	72	21	200	27	135	84	61	750	417	131
Otu00041	597	135	555	18	267	376	1282	0	286	227	23	1267	5	10	1410	2	8	378
Otu00042	634	116	581	14	282	385	1260	0	287	251	11	1283	0	15	1224	0	4	380
Otu00043	19	11	71	379	70	50	17	101	84	35	72	30	57	36	39	80	74	24
Otu00044	1311	450	945	92	753	395	1027	3	476	397	81	1077	8	74	1601	16	87	746
Otu00045	245	151	297	2204	284	543	121	149	319	576	418	126	275	284	320	480	520	553
Otu00046	230	143	273	1011	257	216	161	636	363	150	193	134	185	271	192	923	432	284
Otu00047	287	61	278	109	188	297	3348	2	302	1720	123	278	19	65	438	15	117	1685
Otu00048	226	72	146	319	105	65	228	190	92	72	139	78	60	65	72	295	301	287
Otu00049	22	86	68	419	29	28	27	1914	67	56	179	26	97	52	32	1266	210	104
Otu00050	227	233	409	618	134	347	129	144	482	183	310	281	97	188	274	187	1029	541
Otu00051	205	168	166	374	55	83	182	708	192	216	206	216	84	100	75	461	472	475
Otu00052	73	98	484	810	98	459	313	102	386	258	257	258	113	111	271	254	411	345
Otu00053	159	182	224	653	92	224	87	309	280	154	260	244	109	129	148	536	619	491
Otu00054	507	266	1020	315	261	529	324	4	607	220	166	628	32	155	471	16	193	843
Otu00055	0	0	0	0	0	0	16	1	11	7	3	1	3	0	0	0	0	3
Otu00056	177	54	114	1503	352	152	32	691	184	129	191	61	29	172	93	364	429	75
Otu00057	1053	134	640	6	379	246	501	0	175	137	7	603	1	20	799	1	3	257
Otu00058	107	117	244	635	145	338	159	43	329	565	324	379	115	164	288	94	560	543
Otu00059	69	106	76	326	20	62	23	1464	104	41	122	42	44	75	29	391	228	134
Otu00060	41	40	48	248	7	23	5	1143	78	31	86	25	46	60	15	696	241	72
Otu00061	176	77	177	209	77	46	184	569	84	73	206	103	70	89	43	430	368	269
Otu00062	120	98	258	363	140	147	853	45	149	619	350	81	29	191	269	124	181	392
Otu00063	139	73	264	359	128	370	185	54	205	285	250	170	112	143	187	151	379	427
Otu00064	307	79	267	9	98	141	486	0	130	85	9	557	1	7	317	2	13	164
Otu00065	253	97	334	68	160	362	351	0	354	219	71	425	9	65	391	3	52	453
Otu00066	87	224	240	180	81	209	92	42	264	101	167	268	81	133	278	168	338	272
Otu00067	211	118	314	19	240	741	454	0	177	297	40	492	2	19	466	10	33	218
Otu00068	157	77	120	252	64	66	101	162	83	86	143	88	18	92	83	190	307	228
Otu00069	10	106	36	76	42	76	29	319	132	88	1028	34	120	819	26	297	49	40
Otu00070	388	224	389	64	169	192	339	2	160	198	63	317	7	39	460	11	58	376
Otu00071	59	45	141	225	35	85	63	270	82	66	161	104	47	50	48	225	254	167
Otu00072	308	18	187	0	207	194	315	0	32	23	0	479	0	6	1498	0	0	32
Otu00073	213	27	181	1	136	154	146	0	45	23	1	319	0	3	537	0	0	37
Otu00074	95	73	95	324	54	104	70	144	112	63	96	122	19	66	88	271	230	174
Otu00075	6	20	28	210	19	23	10	554	28	9	101	17	26	10	5	239	165	12
Otu00076	63	42	66	174	43	35	28	449	41	40	93	60	52	61	23	383	219	104
Otu00077	229	70	283	0	187	295	266	0	121	79	9	455	1	5	344	1	2	82
Otu00078	78	106	198	144	85	283	97	0	236	122	137	215	29	111	165	20	85	131
Otu00079	199	18	229	7	151	368	447	0	85	289	13	475	4	4	515	1	9	215
Otu00080	1	1	1	18	21	2	22	19	6	1	7	0	0	9	9	0	13	3
Otu00081	71	75	50	102	38	27	73	240	91	51	73	45	45	66	39	175	125	75
Otu00082	79	45	105	372	36	57	24	193	62	20	119	66	38	60	46	263	264	147
Otu00083	7	3	8	44	8	18	182	78	5	37	10	2	2	14	8	12	35	28
Otu00084	40	46	76	213	96	101	74	87	59	78	120	42	14	44	64	127	70	71
Otu00085	16	37	89	10	41	139	29	0	97	9	18	212	5	25	244	0	10	65
Otu00086	0	0	0	0	0	0	0	0	0	0	0	0	0	0	0	0	0	0
Otu00087	307	91	345	21	96	197	226	0	135	66	16	308	0	15	129	1	18	179
Otu00088	119	21	158	0	57	146	204	0	21	47	0	392	0	1	452	0	0	45
Otu00089	0	0	0	63	19	63	95	46	209	88	96	82	41	77	72	122	243	275
Otu00090	62	32	68	99	25	35	26	187	77	15	74	58	27	55	31	92	216	161
Otu00091	12	19	22	189	32	43	2	123	39	2	45	22	17	81	41	68	107	5
Otu00092	105	45	252	66	39	204	125	0	169	85	27	190	14	33	152	10	85	244
Otu00093	24	15	43	212	31	65	13	127	36	26	100	32	39	31	30	78	325	88
Otu00094	63	19	119	112	202	245	31	5	181	47	61	115	5	53	130	28	71	57
Otu00095	11	7	36	98	27	20	7	80	20	4	6	32	3	41	13	24	40	13
Otu00096	34	12	52	2	25	25	73	0	13	9	3	59	0	2	73	0	2	29
Otu00097	125	32	116	18	94	128	138	0	94	63	23	303	1	6	128	1	12	141
Otu00098	35	0	12	0	16	44	213	0	4	6	0	278	0	3	191	0	0	0
Otu00099	70	30	38	79	49	12	47	193	52	20	53	55	11	35	27	145	90	103
Otu00100	36	10	50	134	33	35	107	125	41	58	103	45	15	25	28	53	132	109
Otu00101	351	32	134	62	105	49	191	1	61	43	56	118	4	24	89	8	41	147
Otu00102	8	48	39	102	35	38	4	75	38	35	119	11	90	22	42	229	168	41
Otu00103	32	43	91	123	58	158	82	8	104	95	57	61	36	55	77	11	122	88
Otu00104	28	18	44	187	41	112	28	4	33	179	87	26	79	22	123	42	32	40
Otu00105	12	114	41	99	10	8	11	141	48	23	38	8	56	21	17	70	97	60
Otu00106	33	109	21	53	9	13	20	86	69	9	40	74	30	21	13	81	82	68
Otu00107	95	25	147	2	60	97	253	0	30	21	6	179	1	2	232	0	1	62
Otu00108	40	25	147	28	28	184	165	0	88	87	48	111	3	20	183	1	39	208
Otu00109	1	0	0	0	27	3	8	4	6	1	21	1	7	0	0	0	3	5
Otu00110	120	101	111	52	43	98	72	0	109	63	31	121	4	28	66	5	45	171
Otu00111	116	33	81	2	68	33	79	0	30	17	11	70	0	11	43	1	6	77
Otu00112	43	31	78	149	29	86	69	23	69	63	81	54	23	35	40	14	233	172
Otu00113	224	13	111	0	91	116	416	0	14	43	0	199	0	1	205	0	0	26
Otu00114	14	53	14	1	2	0	4	293	21	6	56	13	1	6	5	80	123	33
Otu00115	3	25	11	40	2	33	14	100	103	65	400	17	50	184	22	132	4	40
Otu00116	5	32	8	196	5	54	5	99	27	34	82	23	50	19	23	132	84	23
Otu00117	39	15	87	12	55	231	112	0	66	87	12	217	1	5	87	2	5	37
Otu00118	205	1	8	14	9	3	16	3	5	0	6	99	0	4	2	10	16	16
Otu00119	16	45	41	65	13	31	8	28	21	19	36	40	8	55	10	141	78	99
Otu00120	22	24	8	61	18	9	15	158	11	11	39	14	7	28	9	65	133	44
Otu00121	15	45	95	33	31	140	65	0	66	70	41	69	2	13	164	7	32	114
Otu00122	13	32	21	85	10	32	12	47	62	28	44	32	18	15	31	69	61	49
Otu00123	4	15	8	0	0	8	0	137	33	8	107	5	22	82	0	194	5	7
Otu00124	18	7	15	73	11	59	25	23	39	39	58	36	18	20	16	41	52	29
Otu00125	2	0	4	0	0	0	6	0	0	0	0	1	0	0	0	0	0	0
Otu00126	18	22	11	49	13	25	11	80	24	12	46	15	21	25	36	63	24	37
Otu00127	63	13	97	3	53	107	100	0	43	29	2	185	0	5	88	0	3	17
Otu00128	2	0	0	0	0	1	9	0	0	0	0	2	0	0	11	0	0	0
Otu00129	88	14	86	39	9	36	55	0	23	10	14	25	5	20	9	5	75	49
Otu00130	83	16	71	4	29	110	79	0	26	45	7	125	0	2	140	0	3	67
Otu00131	36	19	24	57	44	40	35	21	41	23	64	55	10	23	92	26	18	28
Otu00132	3	16	16	60	11	20	7	119	34	3	15	17	29	11	0	107	40	5
Otu00133	6	29	23	69	22	9	15	14	72	39	50	1	29	19	26	72	12	16
Otu00134	2	0	7	16	4	19	9	84	44	12	239	15	26	126	0	35	8	13
Otu00135	14	29	40	90	7	28	5	20	43	10	11	3	11	14	20	16	59	36
Otu00136	54	15	82	14	6	61	50	0	58	34	31	81	4	15	69	0	9	88
Otu00137	22	9	25	46	16	13	55	5	18	27	44	15	11	33	35	21	59	76
Otu00138	7	16	10	45	4	0	6	112	11	4	10	20	16	3	7	168	42	23
Otu00139	18	45	7	22	7	3	11	16	22	9	10	6	29	33	16	30	11	8
Otu00140	14	7	19	58	18	39	14	15	19	45	41	17	10	28	8	29	61	35
Otu00141	30	6	34	60	25	10	5	8	26	10	23	23	4	16	5	15	70	115
Otu00142	29	16	55	90	30	20	40	0	45	19	18	33	6	22	55	7	36	49
Otu00143	74	30	144	2	10	12	41	2	59	16	0	96	1	8	36	3	0	54
Otu00144	5	24	5	58	15	24	2	52	57	34	126	6	13	95	19	52	5	15
Otu00145	8	0	18	132	15	11	7	17	23	13	27	8	12	55	36	15	42	17
Otu00146	16	6	13	83	10	23	11	27	10	19	43	21	8	21	13	35	89	16
Otu00147	16	28	66	49	13	17	10	1	52	12	19	22	4	20	61	18	49	57
Otu00148	9	20	12	45	7	7	5	32	11	13	27	8	3	9	8	7	32	32
Otu00149	11	16	22	0	38	55	69	0	25	43	27	48	0	15	18	0	3	9
Otu00150	27	25	71	49	14	35	27	5	48	26	17	33	7	17	22	1	23	30
Otu00151	5	6	6	38	3	7	2	45	8	7	13	6	6	12	13	64	56	24
Otu00152	21	9	10	46	4	16	5	47	18	5	25	20	5	4	6	53	52	38
Otu00153	66	6	56	15	17	61	52	0	15	7	8	72	1	3	48	0	7	44
Otu00154	2	8	11	44	3	3	4	82	6	6	12	3	7	9	9	51	47	21
Otu00155	10	22	42	73	15	17	6	32	24	13	17	24	6	6	9	23	58	22
Otu00156	1	9	3	3	1	1	0	94	2	0	44	1	36	260	128	4	13	5
Otu00157	8	14	17	61	0	7	0	52	14	5	0	5	1	9	9	28	35	15
Otu00158	4	0	14	48	2	16	0	45	10	1	6	0	0	2	6	11	10	4
Otu00159	38	1	32	0	6	19	42	0	6	8	0	129	1	0	44	0	0	4
Otu00160	1	1	7	11	6	5	4	0	1	0	0	1	0	3	0	13	0	0
Otu00161	19	18	47	5	30	52	41	0	39	17	9	97	0	4	58	1	6	23
Otu00162	15	28	10	13	7	0	5	27	13	18	15	0	16	10	16	38	13	16
Otu00163	32	56	107	0	0	1	0	1	1	1	0	0	0	0	0	1	1	2
Otu00164	3	24	26	15	13	16	6	9	50	51	75	44	3	8	26	11	15	22
Otu00165	23	14	21	21	7	19	19	19	35	7	18	26	2	23	8	19	20	35
Otu00166	0	15	3	0	1	2	0	59	4	0	38	0	40	16	0	95	5	0
Otu00167	15	11	21	0	26	43	37	0	25	37	15	42	1	4	52	0	0	16
Otu00168	0	1	17	44	23	18	0	5	6	2	16	12	3	25	17	21	25	9
Otu00169	14	28	26	6	48	14	23	0	19	14	13	6	0	2	101	1	5	46
Otu00170	14	8	6	130	7	13	1	37	3	20	24	1	10	7	4	66	9	12
Otu00171	12	14	11	10	3	34	5	67	15	8	15	12	4	7	8	22	46	23
Otu00172	30	5	34	5	13	59	80	1	14	52	2	34	0	2	20	4	5	20
Otu00173	5	23	1	13	2	11	1	35	44	18	171	2	0	54	3	17	8	21
Otu00174	0	0	0	3	0	0	0	0	1	0	0	1	0	0	0	0	0	0
Otu00175	0	2	9	29	11	0	0	9	9	1	8	2	0	18	9	44	38	6
Otu00176	10	3	8	18	5	11	10	3	7	14	16	9	6	4	10	13	26	16
Otu00177	14	10	21	12	5	27	22	0	14	13	3	57	10	10	47	1	4	30
Otu00178	0	0	0	0	0	0	0	0	0	0	0	0	0	0	0	0	0	0
Otu00179	14	0	10	0	14	37	27	0	4	5	0	136	0	1	31	0	0	6
Otu00180	2	0	0	0	0	0	1	0	0	0	0	0	0	0	0	0	0	2
Otu00181	31	3	37	2	24	46	45	0	13	8	2	28	0	4	22	0	5	30
Otu00182	7	10	7	22	6	12	8	41	5	0	13	7	6	12	5	12	42	2
Otu00183	7	1	15	16	0	8	4	27	12	1	8	8	4	3	0	19	57	9
Otu00184	5	5	5	15	3	19	4	13	8	15	131	3	4	49	11	6	0	17
Otu00185	13	4	2	27	22	9	15	9	13	1	8	3	8	9	0	22	23	19
Otu00186	44	9	23	5	17	21	14	0	11	8	6	28	0	3	39	2	3	21
Otu00187	4	3	6	31	0	8	1	38	6	8	4	4	8	0	7	9	25	16
Otu00188	0	0	1	0	0	0	1	0	0	0	0	0	0	0	0	0	1	1
Otu00189	6	0	1	47	0	6	6	50	15	2	2	2	0	1	5	13	2	7
Otu00190	7	8	12	25	6	5	3	10	6	7	14	12	3	10	4	12	20	6
Otu00191	16	8	21	22	21	16	7	4	8	6	7	17	2	3	8	8	32	15
Otu00192	4	30	16	25	8	13	1	10	31	10	20	3	6	14	13	9	25	55
Otu00193	9	3	14	79	21	7	3	4	8	7	19	1	1	8	2	10	36	6
Otu00194	17	5	10	36	12	7	3	7	18	4	9	2	1	32	12	9	41	14
Otu00195	4	12	22	2	14	19	35	0	19	22	20	15	0	2	38	0	3	11
Otu00196	0	0	0	0	0	0	0	0	0	0	0	0	0	0	0	0	0	0
Otu00197	12	4	0	35	0	8	0	7	1	10	14	10	9	7	7	36	21	12
Otu00198	5	8	14	55	6	7	4	25	6	1	10	15	1	3	9	11	19	3
Otu00199	2	6	6	25	8	3	3	11	9	11	5	12	0	6	0	5	18	12
Otu00200	10	5	19	10	11	18	8	2	12	6	8	9	2	9	4	0	4	23
Otu00201	0	2	5	63	0	8	3	18	4	6	8	4	0	6	0	16	32	7
Otu00202	0	0	0	0	0	0	0	0	0	0	0	0	0	0	0	0	0	0
Otu00203	5	6	11	22	6	51	4	1	23	6	12	33	3	5	2	0	6	22
Otu00204	4	0	0	0	0	216	8	0	5	0	1	0	0	1	9	0	2	0
Otu00205	6	0	1	0	2	0	48	0	0	0	0	87	0	1	75	0	0	0
Otu00206	3	30	11	4	7	9	11	0	21	64	28	9	0	1	6	4	0	2
Otu00207	15	1	16	2	15	9	29	0	2	18	1	50	0	1	29	0	2	8
Otu00208	0	4	7	17	6	3	2	19	3	1	4	0	6	1	14	33	27	14
Otu00209	6	4	16	21	3	21	18	3	5	13	23	6	3	8	13	16	19	23
Otu00210	0	0	2	16	0	9	0	47	14	11	17	5	0	0	1	36	0	18
Otu00211	14	11	7	23	18	4	5	8	3	5	16	5	0	8	0	11	13	11
Otu00212	10	9	3	1	0	5	6	0	8	0	0	15	0	1	8	0	1	11
Otu00213	0	0	4	4	0	0	0	0	0	0	1	0	0	0	0	1	3	1
Otu00214	3	12	0	3	2	12	0	0	5	4	27	5	7	19	6	46	11	7
Otu00215	3	0	0	1	7	3	7	0	3	23	15	0	4	7	0	4	30	3
Otu00216	0	0	0	0	0	0	0	0	0	0	0	0	0	0	0	0	0	0
Otu00217	16	0	9	17	2	3	3	14	0	2	10	11	1	22	7	62	24	10
Otu00218	0	0	0	0	2	0	1	0	0	1	0	0	0	0	0	4	0	0
Otu00219	8	12	4	17	9	20	14	0	18	8	1	17	0	9	27	2	5	15
Otu00220	19	13	19	11	2	14	6	2	12	8	4	16	1	3	8	5	7	20
Otu00221	22	3	41	6	8	20	16	0	11	2	6	13	1	3	9	0	6	42
Otu00222	13	0	4	10	2	5	4	7	0	6	24	0	1	0	7	25	9	7
Otu00223	7	11	9	18	9	15	2	2	14	8	11	5	9	9	10	7	5	15
Otu00224	19	2	46	2	1	24	12	0	20	6	8	34	0	8	0	0	2	24
Otu00225	21	5	22	10	14	7	14	3	10	4	1	21	4	10	16	0	17	22
Otu00226	12	0	19	0	5	21	43	0	1	12	0	45	0	0	20	0	0	1
Otu00227	0	0	0	0	0	0	0	0	0	0	0	0	0	0	0	0	0	0
Otu00228	4	3	1	8	4	1	0	74	4	0	9	2	1	4	1	25	10	5
Otu00229	9	3	14	0	7	10	45	0	5	24	1	22	0	0	42	0	1	25
Otu00230	1	0	6	36	5	11	3	0	1	55	2	5	11	6	6	8	3	9
Otu00231	5	0	6	15	17	12	18	2	4	8	13	14	2	8	18	10	20	12
Otu00232	10	0	0	0	3	2	27	0	0	0	0	37	0	0	38	0	0	0
Otu00233	8	0	12	1	11	0	25	0	0	4	0	14	0	0	5	0	5	76
Otu00234	11	0	4	0	8	22	62	0	0	5	0	51	0	0	32	0	0	1
Otu00235	2	3	2	0	16	29	8	0	41	29	0	0	5	45	21	0	0	0
Otu00236	11	7	15	8	8	9	3	4	12	5	6	10	2	3	8	5	9	12
Otu00237	0	0	0	0	5	34	0	0	10	13	10	2	18	4	3	13	0	0
Otu00238	24	2	12	14	7	17	13	0	20	5	3	10	6	14	9	6	9	11
Otu00239	2	1	0	13	0	2	4	19	5	0	6	2	2	4	8	17	32	4
Otu00240	16	5	8	14	7	7	10	6	8	6	7	5	5	3	9	7	19	7
Otu00241	0	0	1	0	1	0	0	0	0	0	0	0	0	0	0	0	1	1
Otu00242	0	0	0	150	0	0	0	0	5	0	0	0	0	0	0	0	1	0
Otu00243	0	7	0	4	9	3	0	56	24	0	9	0	0	5	13	44	0	7
Otu00244	2	1	11	8	3	13	3	0	1	8	5	8	0	6	6	15	25	21
Otu00245	10	6	9	13	3	3	1	2	17	3	7	10	3	4	8	3	8	14
Otu00246	5	10	4	20	3	0	3	11	8	4	5	6	9	8	2	3	18	7
Otu00247	8	33	7	8	5	7	6	10	9	19	38	1	3	2	3	6	7	10
Otu00248	4	8	3	0	5	13	0	3	7	25	54	6	1	37	9	0	0	6
Otu00249	0	0	0	1	2	0	0	0	0	0	0	0	0	0	0	0	2	1
Otu00250	3	6	3	0	2	4	4	1	9	22	4	0	2	3	0	0	1	5
Otu00251	0	0	0	0	0	0	0	0	0	0	0	0	0	0	0	0	0	0
Otu00252	10	7	8	13	4	1	5	0	5	2	10	2	8	0	5	2	15	15
Otu00253	3	0	0	0	0	3	0	3	0	8	4	11	1	0	3	34	19	2
Otu00254	7	5	3	1	6	43	16	0	3	26	2	19	1	4	38	0	0	4
Otu00255	16	4	13	13	8	8	1	0	13	4	8	4	0	9	0	0	30	18
Otu00256	0	0	9	34	9	6	1	3	8	4	5	2	4	1	3	0	8	8
Otu00257	0	3	4	0	1	1	0	4	15	8	34	0	0	13	0	48	0	0
Otu00258	6	1	18	0	0	17	111	0	6	20	4	6	0	1	0	0	0	10
Otu00259	3	3	5	9	4	18	10	0	19	24	5	13	1	4	11	0	6	11
Otu00260	0	0	23	0	3	12	2	5	11	12	45	9	0	32	7	0	0	2
Otu00261	3	0	4	0	2	6	10	0	4	1	1	19	0	2	9	0	0	0
Otu00262	3	3	6	9	0	0	3	13	5	1	3	1	2	1	1	18	26	5
Otu00263	0	3	3	21	1	0	0	23	0	1	6	3	0	4	0	9	0	12
Otu00264	1	0	5	13	8	7	3	17	4	4	15	2	5	3	2	4	8	5
Otu00265	0	0	0	0	0	0	0	0	0	0	0	0	0	0	0	0	0	0
Otu00266	0	0	3	13	2	1	0	11	7	3	1	0	5	3	0	7	16	2
Otu00267	16	5	22	14	5	3	8	0	10	7	4	27	1	1	7	1	2	8
Otu00268	0	0	0	0	0	2	0	47	0	1	23	0	11	4	0	0	0	0
Otu00269	2	0	8	30	3	30	16	0	4	28	4	9	0	1	9	1	0	4
Otu00270	0	0	0	0	0	2	0	0	0	0	0	0	0	0	0	0	0	0
Otu00271	0	8	1	7	0	0	2	36	3	0	2	0	0	3	7	2	14	9
Otu00272	4	8	7	8	4	5	1	2	8	2	4	7	2	4	5	3	8	11
Otu00273	5	4	0	22	2	5	1	25	6	2	0	0	3	3	3	7	21	9
Otu00274	5	6	6	15	1	8	1	4	6	2	3	8	1	1	6	5	27	11
Otu00275	1	6	0	11	15	9	3	0	3	15	5	40	1	1	18	2	0	5
Otu00276	0	2	0	0	0	0	0	32	6	4	23	0	0	19	0	0	11	0
Otu00277	10	3	3	0	18	3	31	0	1	5	1	12	0	0	17	1	0	1
Otu00278	17	0	5	1	20	17	18	0	5	9	2	7	0	1	15	1	0	11
Otu00279	1	3	0	11	1	1	1	19	4	0	5	1	2	3	2	23	11	1
Otu00280	1	0	0	1	7	0	20	0	0	26	53	0	0	0	14	0	0	0
Otu00281	1	6	2	1	2	7	6	6	15	6	5	1	0	0	7	7	0	20
Otu00282	2	9	11	0	3	17	5	0	14	18	15	12	0	8	5	0	0	4
Otu00283	7	5	2	6	4	3	2	8	0	1	7	9	0	4	3	18	8	7
Otu00284	3	0	11	9	18	10	5	0	13	1	3	3	0	5	5	0	11	11
Otu00285	0	0	0	22	0	4	0	18	0	0	14	0	0	5	8	0	23	0
Otu00286	25	6	11	2	3	1	5	0	8	2	7	5	0	1	4	3	5	27
Otu00287	1	0	0	0	0	0	0	0	30	3	12	1	26	3	28	0	10	4
Otu00288	0	1	1	8	0	1	0	10	4	1	4	1	0	2	2	11	16	5
Otu00289	0	2	1	2	4	8	3	24	4	7	14	4	0	0	0	9	5	2
Otu00290	5	2	6	16	5	4	19	0	14	2	5	6	0	3	6	2	4	8
Otu00291	0	5	0	8	0	2	0	6	0	6	9	0	12	2	0	0	18	3
Otu00292	1	5	5	0	0	2	0	3	8	5	37	0	0	29	7	3	4	1
Otu00293	4	16	0	0	0	3	0	0	4	23	30	10	2	17	2	0	0	8
Otu00294	9	3	5	5	4	8	7	3	9	4	9	7	0	0	1	12	4	7
Otu00295	0	0	1	0	2	0	0	0	0	3	50	0	0	4	4	0	0	4
Otu00296	2	0	1	0	0	0	0	44	0	1	0	4	28	0	0	32	0	0
Otu00297	13	9	13	2	18	3	8	0	3	4	8	6	2	2	12	2	0	3
Otu00298	0	2	16	14	0	3	12	0	8	7	0	6	0	2	0	1	2	2
Otu00299	13	1	15	2	10	18	15	0	7	0	5	3	0	3	12	0	6	3
Otu00300	2	1	2	0	2	1	0	10	3	1	4	1	2	0	6	16	18	11
Otu00301	4	5	55	6	0	1	2	1	7	3	0	1	0	0	10	0	8	5
Otu00302	3	2	3	4	0	5	4	9	7	3	6	4	0	0	5	7	4	3
Otu00303	12	2	12	0	2	8	6	0	2	5	0	21	1	0	10	0	0	2
Otu00304	3	1	0	0	0	0	3	6	0	6	28	0	6	2	0	1	0	3
Otu00305	5	2	10	3	4	3	2	3	12	2	4	3	1	5	3	3	8	7
Otu00306	0	0	0	2	2	0	1	1	0	0	0	0	0	0	0	1	1	1
Otu00307	0	1	3	10	0	0	1	7	1	1	1	2	2	0	1	5	21	3
Otu00308	0	2	3	17	0	1	0	5	1	0	2	0	3	3	3	9	6	5
Otu00309	9	3	11	4	1	2	1	0	2	0	4	0	3	0	0	18	9	4
Otu00310	1	0	0	0	0	1	3	7	0	0	0	1	0	0	0	12	0	1
Otu00311	0	7	0	0	0	0	0	15	11	3	27	0	2	4	0	12	11	11
Otu00312	0	0	0	0	0	0	0	0	0	0	0	0	0	0	0	0	0	0
Otu00313	1	4	7	5	1	3	5	0	2	1	2	5	0	0	6	1	6	7
Otu00314	1	0	0	0	0	0	0	76	0	5	3	1	0	0	0	24	0	0
Otu00315	0	10	0	0	0	4	0	11	0	0	42	5	8	6	0	0	4	0
Otu00316	0	0	0	0	0	0	1	0	0	0	0	0	0	0	0	0	0	0
Otu00317	5	1	3	2	6	7	2	0	4	13	4	8	3	0	11	0	1	5
Otu00318	2	0	0	15	1	7	0	1	0	1	7	3	0	2	1	1	18	15
Otu00319	7	6	8	7	2	0	0	0	9	3	2	9	0	4	4	4	6	13
Otu00320	14	4	14	4	2	7	2	0	8	6	0	12	0	0	7	0	2	5
Otu00321	1	4	0	4	1	0	0	12	2	0	24	1	0	9	0	10	0	2
Otu00322	0	4	6	9	1	7	1	0	2	9	11	0	8	0	0	0	1	3
Otu00323	3	10	4	0	3	1	2	3	7	4	2	4	0	1	2	0	5	5
Otu00324	0	0	2	0	0	5	1	0	1	8	31	0	6	20	13	0	1	4
Otu00325	0	5	0	0	2	0	0	22	3	1	0	0	0	3	3	0	5	0
Otu00326	3	0	0	0	0	0	0	11	7	3	17	0	0	0	0	10	0	0
Otu00327	0	0	1	0	0	0	1	66	0	0	14	0	23	3	0	0	0	0
Otu00328	0	1	5	8	0	5	2	0	14	2	6	5	3	0	4	0	9	7
Otu00329	4	6	1	0	0	3	0	4	4	1	19	0	0	7	0	21	0	1
Otu00330	0	0	0	1	0	0	0	0	1	0	5	2	3	1	0	13	3	2
Otu00331	6	0	0	0	0	5	0	2	0	0	48	3	0	0	0	28	0	0
Otu00332	2	0	7	0	0	1	0	12	0	2	0	0	0	2	0	0	31	0
Otu00333	10	6	16	1	4	2	5	0	5	4	3	0	1	0	14	0	2	5
Otu00334	0	0	4	7	2	5	4	0	1	0	7	3	4	7	6	0	12	5
Otu00335	3	2	3	5	2	12	4	0	12	7	1	16	2	2	0	0	4	0
Otu00336	0	0	2	3	0	0	1	6	1	0	4	0	2	2	0	6	10	5
Otu00337	0	0	0	0	0	0	0	0	0	0	5	1	18	0	0	20	0	0
Otu00338	0	0	0	2	0	3	1	4	6	1	1	0	0	2	0	34	10	1
Otu00339	2	2	6	6	2	2	0	1	5	2	1	4	1	3	3	1	5	6
Otu00340	7	0	2	0	8	3	3	0	0	0	0	17	0	0	17	0	0	1
Otu00341	0	1	2	6	3	0	1	6	0	1	2	0	0	0	2	9	12	3
Otu00342	0	8	3	15	0	1	4	2	4	0	4	3	0	0	5	0	5	5
Otu00343	0	1	0	0	0	0	0	0	0	0	0	1	0	2	0	0	0	0
Otu00344	0	1	0	14	0	0	0	8	2	1	1	0	1	2	2	15	20	4
Otu00345	4	0	0	0	1	0	0	0	0	0	0	0	0	0	0	0	0	0
Otu00346	0	0	0	0	0	0	0	0	0	0	0	0	0	0	0	0	29	0
Otu00347	8	0	5	0	3	5	7	0	4	2	2	9	1	0	2	2	3	10
Otu00348	1	0	0	0	2	0	0	3	1	19	18	0	6	23	0	8	0	0
Otu00349	3	0	0	0	4	0	7	0	2	0	0	0	0	0	3	0	1	2
Otu00350	9	0	7	2	14	1	4	0	1	1	0	2	0	1	4	0	1	3
Otu00351	3	0	12	0	6	0	35	0	4	4	2	7	0	0	6	0	0	12
Otu00352	0	0	1	0	3	1	1	0	0	0	0	0	0	0	0	0	0	0
Otu00353	1	0	2	1	0	0	1	0	2	3	0	3	0	1	1	0	0	2
Otu00354	6	8	5	0	6	1	0	0	10	3	6	2	0	0	24	0	0	8
Otu00355	0	0	0	0	0	0	0	35	0	0	7	0	24	4	0	0	0	0
Otu00356	0	1	3	6	1	0	1	0	1	3	5	1	1	2	0	16	13	5
Otu00357	6	1	3	3	4	2	4	0	2	1	1	9	0	1	4	2	5	2
Otu00358	0	5	1	1	10	5	1	0	2	1	6	25	0	4	0	0	0	6
Otu00359	1	0	0	0	0	1	15	0	0	0	0	33	0	0	17	0	0	0
Otu00360	0	0	0	0	0	0	0	0	0	0	0	0	0	0	0	0	0	0
Otu00361	2	0	8	13	1	0	7	0	0	1	1	0	0	5	7	3	5	13
Otu00362	9	5	9	0	1	3	7	0	2	2	0	25	0	0	10	0	0	5
Otu00363	0	0	0	1	2	0	0	0	0	0	2	0	0	0	0	0	0	2
Otu00364	7	2	6	2	6	2	2	0	3	3	0	0	2	2	7	0	0	6
Otu00365	0	0	0	17	0	0	0	0	0	0	0	0	0	0	0	0	0	0
Otu00366	5	3	9	4	1	0	8	1	3	0	0	7	1	2	1	0	2	12
Otu00367	2	1	1	5	3	5	5	1	2	7	4	7	0	3	3	0	9	5
Otu00368	0	1	0	3	0	1	0	3	6	0	27	1	0	10	0	9	0	3
Otu00369	2	10	9	15	8	3	0	0	4	0	4	0	3	2	3	5	2	3
Otu00370	0	1	3	7	6	2	7	1	2	3	7	2	0	1	2	0	0	10
Otu00371	0	0	0	3	0	0	0	30	1	6	22	1	0	1	0	29	3	0
Otu00372	0	0	0	0	0	0	3	0	0	0	0	0	0	0	0	0	0	0
Otu00373	3	1	39	0	1	1	8	0	7	3	0	0	0	0	13	0	1	1
Otu00374	1	1	10	5	4	6	2	1	6	4	1	2	0	0	1	0	8	8
Otu00375	6	0	3	5	1	5	2	0	0	0	2	3	0	0	0	0	6	0
Otu00376	2	0	2	0	0	0	1	0	0	0	0	0	0	0	0	0	0	0
Otu00377	0	0	0	0	0	0	0	0	0	0	0	0	0	0	0	0	0	0
Otu00378	0	0	4	4	0	0	0	0	3	0	0	0	0	1	0	5	3	4
Otu00379	0	0	0	0	0	2	0	8	5	0	19	0	0	10	0	17	0	0
Otu00380	1	2	3	0	0	0	5	0	0	7	23	0	1	15	0	0	0	4
Otu00381	5	0	11	1	3	2	11	0	0	0	0	6	0	0	7	0	0	1
Otu00382	2	3	2	0	5	1	0	0	0	0	2	0	0	4	0	0	0	0
Otu00383	0	1	1	3	1	0	0	5	1	1	2	0	1	0	4	7	5	1
Otu00384	3	0	3	0	0	0	1	0	0	2	0	0	0	0	1	0	0	3
Otu00385	0	0	0	1	0	4	4	0	6	0	6	0	0	3	0	0	0	23
Otu00386	0	0	0	26	4	0	0	0	0	13	3	0	0	0	0	0	7	0
Otu00387	2	1	4	6	0	1	0	0	4	0	3	2	0	5	0	0	11	12
Otu00388	0	0	0	13	0	2	0	0	0	0	14	0	0	5	0	1	0	0
Otu00389	0	0	0	0	2	0	2	0	0	0	0	0	0	0	5	0	0	0
Otu00390	5	4	2	3	0	1	1	0	4	2	4	5	0	2	6	0	5	1
Otu00391	2	0	1	10	2	0	1	11	1	4	5	3	2	0	2	1	5	6
Otu00392	2	3	0	7	1	2	2	0	8	0	4	1	0	0	4	8	1	4
Otu00393	5	0	2	0	4	1	3	0	1	1	0	1	0	0	1	0	0	3
Otu00394	2	0	5	8	0	0	3	0	7	3	1	0	0	2	5	0	1	2
Otu00395	0	1	5	0	2	0	2	0	0	0	0	15	0	0	9	0	0	0
Otu00396	0	2	1	7	0	0	0	6	1	0	0	1	1	2	0	0	3	4
Otu00397	1	0	2	2	2	3	2	0	4	3	2	0	2	3	2	4	2	4
Otu00398	2	0	3	15	2	4	1	0	2	4	8	0	0	0	4	12	7	3
Otu00399	4	6	3	0	6	2	3	0	4	0	5	0	0	2	5	0	1	5
Otu00400	0	0	1	15	2	1	0	5	0	1	0	0	1	3	4	1	4	0
Otu00401	0	5	2	5	0	2	1	9	0	0	1	0	0	1	0	5	10	3
Otu00402	0	0	0	0	4	0	0	0	0	0	22	0	0	0	0	0	0	0
Otu00403	1	0	3	6	1	6	0	2	3	3	1	2	1	2	0	0	6	19
Otu00404	10	0	17	0	7	0	6	0	0	0	2	0	0	0	0	0	0	19
Otu00405	4	2	4	6	6	1	0	0	1	4	0	3	0	0	2	5	1	4
Otu00406	1	2	6	0	0	2	8	0	4	16	0	0	0	2	3	1	0	1
Otu00407	0	0	1	14	0	0	0	0	0	0	8	0	0	6	0	1	2	0
Otu00408	0	0	6	0	8	5	3	0	9	9	11	0	0	4	4	0	0	2
Otu00409	1	1	3	5	0	2	0	5	0	0	7	0	2	0	0	4	13	1
Otu00410	2	1	0	0	8	1	5	0	1	0	0	2	0	0	4	0	0	1
Otu00411	0	0	2	4	0	0	0	4	0	0	3	1	10	0	5	1	0	6
Otu00412	0	1	0	0	0	6	2	0	2	1	14	0	0	11	0	0	1	1
Otu00413	0	0	29	0	0	0	4	0	0	14	2	0	0	2	0	0	1	13
Otu00414	2	0	0	0	5	4	6	0	3	3	2	3	0	0	0	0	0	5
Otu00415	0	2	4	0	1	2	0	3	1	3	2	2	1	1	0	7	6	2
Otu00416	0	0	0	0	1	3	0	21	0	0	4	0	0	0	0	0	0	0
Otu00417	4	0	2	2	0	0	0	5	0	1	2	0	1	6	1	4	7	6
Otu00418	1	2	0	3	0	3	0	0	4	5	0	2	0	0	4	18	1	6
Otu00419	3	1	7	0	0	1	3	0	4	5	0	3	0	0	0	0	0	0
Otu00420	8	0	1	0	8	0	4	0	0	0	1	0	0	0	3	0	0	25
Otu00421	0	0	3	0	5	16	5	0	0	1	0	0	0	0	0	0	0	0
Otu00422	0	0	0	0	1	0	0	0	0	0	0	0	0	0	0	0	0	0
Otu00423	4	0	2	6	0	0	2	1	2	4	4	0	0	2	9	0	1	8
Otu00424	0	0	0	0	0	0	0	0	3	0	11	0	0	7	0	0	0	0
Otu00425	0	0	0	0	0	0	0	2	1	0	0	0	0	1	0	0	0	0
Otu00426	0	0	0	0	0	0	0	0	0	0	0	0	0	0	0	0	0	1
Otu00427	3	0	11	4	1	2	4	0	0	2	0	9	0	1	0	0	0	18
Otu00428	0	2	0	0	7	2	0	0	3	5	22	4	0	1	4	1	0	3
Otu00429	5	1	0	0	3	4	3	0	0	0	0	7	0	0	5	0	0	0
Otu00430	2	2	0	6	0	1	0	7	2	1	3	3	0	2	1	1	3	1
Otu00431	0	0	1	3	0	0	0	0	0	5	5	5	1	1	0	3	0	0
Otu00432	0	0	0	11	0	0	0	0	0	0	0	0	0	0	0	12	0	0
Otu00433	6	0	0	0	0	0	8	0	0	0	0	0	0	0	0	0	0	6
Otu00434	4	3	1	0	5	1	0	1	3	0	0	5	0	0	17	0	0	3
Otu00435	1	0	7	0	2	0	12	0	11	3	3	2	0	3	0	0	0	5
Otu00436	2	6	4	1	0	6	2	0	1	3	0	7	0	2	1	0	1	1
Otu00437	0	0	0	0	0	0	0	0	0	0	0	0	0	0	0	0	0	0
Otu00438	0	0	3	0	0	0	0	1	1	0	24	0	0	16	0	0	0	3
Otu00439	2	3	0	2	0	1	0	0	3	5	4	0	0	0	0	6	0	11
Otu00440	2	0	2	6	0	3	8	0	0	1	5	2	0	1	0	0	2	1
Otu00441	1	0	2	5	0	0	2	0	3	0	3	0	0	2	4	0	4	5
Otu00442	3	1	2	3	0	1	3	0	2	0	4	3	0	2	3	1	2	4
Otu00443	3	0	0	4	2	0	1	0	4	3	2	5	0	0	4	1	2	3
Otu00444	1	0	4	6	0	1	7	0	3	2	1	8	0	0	3	0	5	1
Otu00445	0	0	1	3	1	0	0	1	3	2	6	0	3	1	2	7	6	2
Otu00446	2	0	0	0	2	0	4	0	0	0	0	5	0	0	9	0	0	0
Otu00447	0	0	0	0	0	0	0	0	0	0	0	0	0	0	0	0	0	0
Otu00448	1	0	3	8	0	2	0	2	3	1	3	3	1	7	1	2	2	2
Otu00449	0	0	0	0	0	4	9	0	0	0	0	0	0	0	10	0	0	0
Otu00450	0	1	4	2	4	5	0	0	1	1	2	15	0	0	2	1	4	1
Otu00451	0	1	0	0	2	0	4	3	0	4	21	3	3	1	0	1	6	0
Otu00452	1	2	0	9	4	2	0	8	2	1	1	0	0	1	0	4	6	1
Otu00453	2	0	3	2	2	2	1	1	2	0	7	0	0	2	0	0	3	6
Otu00454	0	3	0	1	0	0	0	8	0	0	6	1	0	1	2	2	0	4
Otu00455	0	0	0	5	0	2	0	4	2	0	1	3	0	1	8	0	2	0
Otu00456	1	1	3	1	0	1	1	0	3	0	2	0	1	1	2	3	5	5
Otu00457	0	0	2	0	17	0	0	0	1	0	3	1	0	0	0	4	5	1
Otu00458	1	1	0	3	2	0	2	2	2	4	0	5	0	0	0	0	1	6
Otu00459	0	7	1	0	0	10	1	0	1	2	4	0	6	0	0	0	15	2
Otu00460	0	0	0	7	0	0	1	0	0	0	1	0	2	0	1	0	0	0
Otu00461	1	0	0	4	0	0	0	7	1	1	1	1	0	1	1	5	3	1
Otu00462	2	0	0	0	0	0	0	0	0	0	0	4	0	0	0	0	0	0
Otu00463	0	0	0	0	0	0	0	0	0	0	0	0	0	0	0	0	0	0
Otu00464	0	0	0	0	3	0	0	0	2	0	24	0	28	2	0	5	0	0
Otu00465	0	0	0	0	0	0	0	0	0	0	0	0	0	0	0	0	0	0
Otu00466	0	0	0	0	0	0	0	0	0	0	0	0	0	0	0	0	0	0
Otu00467	0	0	0	0	0	0	0	0	0	0	0	0	0	0	0	0	0	0
Otu00468	2	0	6	0	2	0	3	1	1	1	0	0	0	3	6	2	8	3
Otu00469	0	0	0	0	0	3	0	0	0	0	0	0	0	3	0	0	0	0
Otu00470	3	0	0	0	0	2	2	0	3	0	0	0	1	0	1	0	15	0
Otu00471	1	0	0	1	0	0	0	0	0	1	0	0	1	0	0	0	3	0
Otu00472	16	1	3	3	0	1	0	0	0	0	1	2	0	0	1	2	3	0
Otu00473	1	0	0	1	0	6	0	0	1	3	0	0	0	0	0	0	8	7
Otu00474	2	4	2	1	1	5	1	0	0	2	0	6	0	2	4	0	0	1
Otu00475	2	1	3	3	0	2	0	0	2	0	6	0	2	0	1	2	5	2
Otu00476	2	5	1	3	0	1	0	1	0	0	0	0	0	2	2	0	1	0
Otu00477	0	0	0	0	0	0	0	0	0	0	0	0	0	0	0	0	0	0
Otu00478	2	2	4	0	6	4	1	0	1	0	0	5	0	0	0	0	0	0
Otu00479	0	3	0	0	0	4	5	0	8	11	18	0	0	7	0	0	0	0
Otu00480	3	1	4	0	0	0	3	0	6	1	8	1	0	6	0	1	1	0
Otu00481	0	0	0	0	0	0	0	0	0	0	0	0	0	0	0	0	0	0
Otu00482	0	0	0	4	0	1	0	5	1	1	0	1	0	1	1	6	5	1
Otu00483	0	0	0	0	0	0	0	0	0	0	0	0	0	0	0	0	0	0
Otu00484	0	0	0	0	0	0	0	0	0	0	0	0	0	0	0	0	0	0
Otu00485	0	0	0	0	0	3	0	0	0	0	0	0	0	4	0	18	0	0
Otu00486	0	0	2	2	0	3	0	0	1	2	2	3	0	0	1	2	10	5
Otu00487	0	0	0	0	0	0	0	0	0	0	0	0	0	0	0	0	0	0
Otu00488	0	2	1	2	0	0	1	0	4	1	0	1	0	4	1	3	4	4
Otu00489	0	3	3	7	6	0	0	0	4	0	0	0	1	2	6	6	0	5
Otu00490	0	0	0	2	0	0	0	0	0	0	1	0	0	1	0	0	0	26
Otu00491	3	0	1	0	4	0	1	0	0	2	0	0	0	0	18	0	0	0
Otu00492	9	0	0	0	0	0	6	0	1	1	0	7	0	0	3	0	0	4
Otu00493	0	1	5	2	0	5	1	0	0	0	3	0	0	0	0	0	2	5
Otu00494	0	0	0	0	0	0	0	0	0	0	0	0	0	0	0	0	0	0
Otu00495	6	0	0	0	0	1	6	0	0	1	0	2	0	0	8	0	0	0
Otu00496	0	0	1	0	0	1	0	0	1	1	0	0	0	3	0	0	0	0
Otu00497	0	0	0	0	0	0	0	0	0	0	0	0	0	0	0	0	0	0
Otu00498	3	1	6	0	2	0	1	0	0	7	4	0	0	2	3	0	0	6
Otu00499	0	4	1	0	0	0	0	0	0	0	5	0	1	8	0	0	2	1
Otu00500	0	0	0	0	1	0	0	5	0	0	0	0	0	0	0	6	3	0
Otu00501	0	0	0	2	1	1	2	0	0	0	1	1	0	0	1	3	4	2
Otu00502	5	1	3	0	1	2	3	0	2	0	0	3	0	0	7	0	0	4
Otu00503	0	3	3	0	3	1	0	2	4	2	0	0	0	0	0	1	0	0
Otu00504	0	0	0	0	0	0	0	0	0	0	0	0	0	0	0	0	0	0
Otu00505	0	0	0	0	0	0	0	0	3	0	0	0	0	0	0	1	0	0
Otu00506	0	11	0	0	3	1	0	1	0	0	3	0	0	2	0	17	0	1
Otu00507	0	0	0	4	0	0	0	15	0	0	1	0	0	0	0	8	1	1
Otu00508	0	0	0	7	0	1	0	10	0	0	0	0	0	0	0	5	3	1
Otu00509	1	1	0	0	1	0	2	0	0	1	0	6	0	0	5	0	0	2
Otu00510	0	0	0	2	0	0	0	0	0	0	0	0	0	0	0	0	0	0
Otu00511	0	0	0	0	0	1	0	8	0	0	2	0	1	0	1	4	2	3
Otu00512	0	0	0	0	0	0	0	0	0	0	0	0	0	0	0	0	0	0
Otu00513	1	1	0	0	0	0	0	0	0	7	12	0	0	7	0	0	0	2
Otu00514	0	1	0	3	0	1	0	2	0	1	1	0	0	2	0	4	6	1
Otu00515	0	0	0	0	0	3	0	2	0	0	12	0	0	0	0	1	0	0
Otu00516	2	3	2	1	0	1	0	0	0	0	0	1	0	0	0	0	0	5
Otu00517	0	1	2	5	1	1	2	2	0	0	2	0	1	1	0	0	2	3
Otu00518	0	8	4	0	4	2	0	0	0	0	3	3	0	0	2	3	2	7
Otu00519	0	0	0	0	0	4	0	0	0	0	10	0	0	1	0	0	0	2
Otu00520	4	0	0	1	0	0	0	0	2	2	1	0	0	0	0	0	4	1
Otu00521	0	1	0	7	0	0	1	0	0	1	1	2	1	0	0	1	6	3
Otu00522	1	2	0	4	2	3	1	0	0	2	0	5	1	0	0	0	4	3
Otu00523	0	2	0	1	1	3	0	0	0	5	0	0	6	0	8	0	0	0
Otu00524	1	0	7	0	2	0	2	0	2	2	0	1	0	0	13	0	0	1
Otu00525	0	0	0	0	0	0	0	0	0	0	0	0	0	0	0	0	0	0
Otu00526	3	2	4	4	5	1	0	0	2	1	1	2	0	0	1	0	1	1
Otu00527	2	1	1	0	1	0	4	0	3	1	1	2	0	1	2	0	0	3
Otu00528	0	0	0	0	7	2	2	0	1	2	0	0	0	1	0	0	1	7
Otu00529	3	0	1	0	0	4	0	0	1	0	0	4	0	0	9	0	0	0
Otu00530	4	0	1	0	2	1	11	0	0	2	0	0	0	0	0	0	0	7
Otu00531	0	0	0	0	1	1	0	0	0	0	1	0	0	0	0	3	2	2
Otu00532	0	0	0	0	0	0	0	22	0	0	0	0	0	0	0	23	0	0
Otu00533	0	1	0	4	0	0	0	0	0	3	3	1	2	2	0	0	0	2
Otu00534	0	0	0	1	0	4	1	0	4	1	9	3	2	6	0	0	0	3
Otu00535	4	0	1	0	1	2	5	0	1	2	2	2	0	0	0	0	0	0
Otu00536	0	0	0	0	0	0	0	0	1	0	0	0	0	0	0	0	0	0
Otu00537	0	0	0	7	5	0	1	0	0	0	0	0	0	0	0	0	7	8
Otu00538	0	0	0	0	0	0	0	0	0	0	6	0	0	8	0	0	0	0
Otu00539	3	0	4	0	1	2	4	0	0	1	1	1	1	0	1	0	0	6
Otu00540	0	1	0	0	1	1	1	0	0	1	0	0	0	0	0	0	0	0
Otu00541	2	3	4	0	4	1	6	0	0	0	0	4	0	0	3	0	0	2
Otu00542	1	0	0	9	0	1	0	0	3	2	0	0	0	3	0	0	0	0
Otu00543	0	2	5	0	0	0	0	0	8	0	1	0	0	1	0	0	0	0
Otu00544	4	0	5	0	0	1	2	0	0	0	0	0	0	1	0	0	0	14
Otu00545	0	0	0	0	1	0	27	0	1	3	0	7	0	0	0	0	0	0
Otu00546	0	0	0	0	2	0	0	0	0	0	1	0	0	0	0	0	0	0
Otu00547	0	0	2	1	3	5	0	0	2	3	1	0	0	2	1	0	4	3
Otu00548	0	0	0	0	0	0	0	0	0	0	0	0	0	0	0	0	0	1
Otu00549	0	0	4	2	0	0	3	0	0	1	0	2	0	0	1	0	0	1
Otu00550	0	0	0	0	0	2	0	0	7	22	0	0	0	4	0	0	0	0
Otu00551	0	0	0	0	0	0	0	0	0	0	0	0	0	0	0	0	0	0
Otu00552	0	0	1	0	0	0	0	5	1	0	2	0	1	1	0	3	1	1
Otu00553	0	1	2	4	2	0	1	0	0	1	2	0	1	1	2	0	0	3
Otu00554	2	0	0	0	0	0	10	0	0	0	0	0	0	0	0	0	0	1
Otu00555	4	1	6	0	4	0	0	0	0	3	0	0	0	0	4	0	0	10
Otu00556	1	0	2	4	3	1	1	0	1	0	1	0	0	0	0	1	2	1
Otu00557	3	2	1	0	2	0	7	0	0	1	0	4	0	0	7	0	0	2
Otu00558	3	0	1	0	0	1	8	0	0	0	0	7	0	0	1	0	0	0
Otu00559	0	0	0	0	0	0	2	0	0	0	0	2	0	0	11	0	0	0
Otu00560	1	0	0	0	0	0	2	0	0	0	0	7	0	0	0	0	0	0
Otu00561	0	0	0	0	0	0	0	1	3	0	0	0	0	0	0	0	0	0
Otu00562	0	5	0	0	0	0	0	1	0	0	16	0	0	0	0	0	0	0
Otu00563	2	1	8	0	1	0	2	0	1	2	0	0	0	0	13	0	0	1
Otu00564	0	0	0	0	0	0	0	0	0	0	0	0	0	0	0	0	0	0
Otu00565	2	0	2	0	1	0	1	0	0	1	3	2	0	0	0	0	0	2
Otu00566	0	1	0	11	0	1	0	0	1	0	4	0	2	2	0	3	0	0
Otu00567	0	0	0	0	0	0	0	0	0	0	0	0	0	0	0	0	0	0
Otu00568	0	0	0	0	0	1	0	0	0	0	0	0	0	0	2	0	0	0
Otu00569	3	0	1	0	1	0	25	0	3	0	0	0	0	0	6	0	0	0
Otu00570	0	0	0	0	1	0	0	0	0	0	0	16	0	0	0	0	0	5
Otu00571	0	0	7	0	0	8	0	0	0	0	0	17	0	0	0	0	0	0
Otu00572	2	0	4	0	0	2	0	8	0	0	0	0	0	0	0	0	0	0
Otu00573	0	2	4	0	1	2	0	0	2	4	0	3	0	0	0	0	0	1
Otu00574	0	0	1	0	4	0	0	0	1	0	4	0	0	5	1	1	0	1
Otu00575	0	0	0	0	0	0	2	0	0	0	0	25	0	0	0	0	0	1
Otu00576	0	0	0	0	0	0	0	0	0	0	0	0	0	0	0	0	0	0
Otu00577	0	0	2	4	0	2	0	0	0	0	0	2	0	0	1	1	2	3
Otu00578	0	0	0	0	0	0	0	0	0	0	0	0	0	0	0	0	0	0
Otu00579	0	0	1	1	1	0	0	0	1	0	2	0	0	0	0	2	3	0
Otu00580	2	0	3	4	0	0	0	0	2	1	1	0	0	1	0	0	1	14
Otu00581	2	0	0	0	0	0	7	0	0	0	0	0	0	0	0	0	0	1
Otu00582	0	0	0	0	0	0	0	0	0	0	0	0	0	0	0	0	0	0
Otu00583	0	5	0	5	0	0	0	0	10	1	2	0	0	5	0	0	0	0
Otu00584	0	0	2	0	2	0	0	0	1	3	0	1	0	0	0	0	0	0
Otu00585	2	0	3	0	3	3	3	0	0	0	0	9	0	0	4	0	0	0
Otu00586	0	0	3	0	0	0	0	0	0	0	1	0	0	0	0	0	0	0
Otu00587	0	0	0	0	2	0	0	3	0	0	7	0	0	0	3	3	0	0
Otu00588	1	0	1	2	0	0	0	1	1	1	1	2	0	0	0	5	1	1
Otu00589	0	1	3	1	0	2	0	0	0	0	1	0	1	0	0	0	2	2
Otu00590	0	0	2	1	0	0	1	0	1	1	4	0	1	8	0	1	0	0
Otu00591	0	0	0	0	0	0	0	0	0	0	0	0	0	0	0	0	0	0
Otu00592	2	0	2	0	1	0	9	0	0	1	0	7	0	0	0	0	0	0
Otu00593	0	0	1	3	0	0	0	1	3	1	2	0	2	3	0	1	2	1
Otu00594	0	1	0	0	1	1	1	0	3	0	3	0	0	0	0	0	1	3
Otu00595	0	0	0	0	0	0	0	6	0	0	0	0	0	3	0	0	0	0
Otu00596	1	0	0	2	0	0	0	0	1	0	1	0	0	0	0	2	1	1
Otu00597	0	0	0	1	0	0	0	0	0	0	0	0	0	0	0	3	4	3
Otu00598	0	0	1	1	4	3	3	0	1	1	0	3	0	0	0	0	0	1
Otu00599	0	0	0	0	0	0	0	0	0	0	3	0	0	0	0	15	0	3
Otu00600	0	0	0	0	0	0	0	38	0	0	0	0	0	0	0	0	0	0
Otu00601	0	0	0	0	0	0	0	0	0	0	0	0	0	0	0	0	0	0
Otu00602	0	0	0	18	0	0	0	0	0	8	2	0	0	6	0	0	0	0
Otu00603	1	3	0	0	0	0	0	0	4	0	0	0	0	0	0	1	6	0
Otu00604	0	0	0	0	0	0	0	0	0	0	0	0	0	0	0	0	0	0
Otu00605	0	0	0	0	0	0	0	0	0	0	0	0	0	0	0	0	0	0
Otu00606	0	0	1	1	2	0	1	0	1	0	0	5	0	0	0	0	0	0
Otu00607	1	1	2	2	0	0	0	1	0	1	1	0	0	0	3	3	1	0
Otu00608	0	0	0	0	0	0	0	0	0	0	0	0	0	0	0	0	0	0
Otu00609	3	1	0	0	2	0	3	0	3	2	1	1	2	0	0	0	1	5
Otu00610	0	0	0	0	0	0	0	0	0	0	0	0	0	2	0	0	0	0
Otu00611	1	0	6	2	0	2	2	0	1	0	0	4	0	1	0	0	2	1
Otu00612	0	0	0	0	1	4	0	1	1	1	0	0	0	0	2	0	0	0
Otu00613	0	0	0	17	0	0	1	0	0	0	0	0	0	0	0	0	0	0
Otu00614	0	0	0	0	0	0	0	0	0	0	0	0	0	0	0	0	0	0
Otu00615	0	0	0	0	0	0	0	0	0	0	0	0	0	0	0	36	0	0
Otu00616	0	0	0	0	0	0	0	0	0	0	0	0	0	0	0	0	0	0
Otu00617	1	1	2	0	0	1	1	3	0	1	0	5	1	0	0	1	0	1
Otu00618	0	0	0	0	0	0	0	0	0	0	0	1	0	0	0	35	0	0
Otu00619	0	0	2	2	1	1	0	1	0	0	1	1	1	1	1	0	1	1
Otu00620	0	0	0	0	0	0	0	7	1	0	0	0	0	0	0	3	1	0
Otu00621	1	2	2	0	1	2	2	0	0	0	2	2	0	2	0	0	0	5
Otu00622	0	7	3	0	1	2	3	0	2	0	0	0	0	0	11	0	0	0
Otu00623	2	1	2	3	0	1	0	0	1	1	0	1	0	1	0	0	5	4
Otu00624	0	0	0	1	0	0	0	0	1	0	1	0	0	1	7	0	0	4
Otu00625	1	0	0	2	0	0	0	2	0	0	0	0	0	1	0	0	1	0
Otu00626	0	0	1	4	3	0	1	0	2	0	0	0	0	0	4	0	2	0
Otu00627	0	0	1	0	0	0	0	0	4	3	3	0	0	3	0	0	0	0
Otu00628	0	0	2	5	0	1	0	0	1	1	2	0	0	2	1	3	0	0
Otu00629	1	3	0	0	0	0	0	0	2	0	0	0	0	0	0	1	0	1
Otu00630	1	0	4	2	2	1	1	0	0	0	1	1	0	0	0	0	0	0
Otu00631	0	0	0	0	0	0	0	0	0	0	0	0	0	0	0	0	0	0
Otu00632	0	0	0	23	0	0	0	11	0	0	0	0	0	0	0	0	0	0
Otu00633	0	0	0	0	0	0	2	1	0	0	0	0	0	0	0	0	0	0
Otu00634	0	5	0	0	0	0	0	7	0	0	13	0	0	0	0	0	0	0
Otu00635	0	0	1	0	0	0	3	0	4	0	0	0	0	0	0	0	0	0
Otu00636	1	0	0	0	3	4	3	0	0	0	0	1	0	0	0	0	0	2
Otu00637	0	0	0	0	0	0	0	0	0	0	0	0	0	0	0	0	0	0
Otu00638	0	0	0	0	0	3	0	0	0	0	0	0	0	0	0	0	3	16
Otu00639	0	0	4	3	0	0	0	3	0	0	3	1	0	0	0	0	3	0
Otu00640	2	1	5	0	0	0	1	0	0	0	0	13	0	0	2	0	0	0
Otu00641	2	0	0	0	0	0	2	0	0	0	0	0	0	0	0	0	0	0
Otu00642	1	0	0	0	23	0	1	0	0	0	0	0	0	0	0	0	0	3
Otu00643	5	2	3	0	1	0	0	0	3	0	0	3	0	0	1	0	0	0
Otu00644	0	0	0	0	0	0	0	0	0	0	7	0	0	0	0	0	0	0
Otu00645	0	1	6	3	1	1	0	1	0	1	0	0	1	1	0	1	1	4
Otu00646	0	1	0	0	0	0	1	0	4	2	5	0	0	3	0	3	0	0
Otu00647	1	0	1	1	0	3	0	0	1	0	1	2	0	0	1	1	0	0
Otu00648	0	0	0	0	0	0	0	32	0	0	0	0	0	0	0	1	0	0
Otu00649	1	0	0	2	2	0	2	0	1	0	4	5	3	1	3	0	0	0
Otu00650	0	0	1	1	0	0	0	2	0	1	0	1	0	3	3	1	2	0
Otu00651	0	0	0	0	0	0	0	0	0	0	0	0	0	0	0	0	0	0
Otu00652	0	0	0	0	0	0	0	0	0	0	0	0	0	0	0	0	0	0
Otu00653	3	0	0	0	0	0	2	0	0	0	0	0	0	0	0	0	0	1
Otu00654	0	0	0	0	0	0	0	0	0	2	0	0	0	0	0	0	0	0
Otu00655	0	0	0	4	0	1	0	3	1	1	0	0	0	3	1	0	0	0
Otu00656	0	0	0	0	0	0	0	0	0	0	0	0	0	0	0	0	0	0
Otu00657	1	2	2	0	0	2	0	1	0	0	0	2	0	3	0	3	1	0
Otu00658	0	0	0	0	2	0	0	3	0	0	0	1	0	0	0	2	0	1
Otu00659	0	0	0	0	0	0	0	0	0	0	1	0	0	0	0	0	0	0
Otu00660	0	0	0	2	0	0	0	16	1	0	0	0	0	0	0	0	4	0
Otu00661	0	5	0	0	0	0	0	0	0	0	18	0	0	0	0	2	0	0
Otu00662	0	0	0	0	1	0	0	0	0	0	0	0	0	0	0	0	0	0
Otu00663	0	0	0	0	0	0	1	0	0	0	0	0	0	0	0	0	0	0
Otu00664	0	0	0	0	0	0	0	0	0	0	0	0	0	0	0	0	1	0
Otu00665	0	0	0	1	0	0	0	0	0	0	0	1	0	0	0	7	0	3
Otu00666	0	0	0	0	0	0	0	32	0	0	0	0	0	0	0	0	0	0
Otu00667	0	0	0	0	0	0	0	0	0	0	0	0	0	0	0	0	0	0
Otu00668	0	0	0	0	0	0	0	0	0	0	0	0	0	0	0	0	0	0
Otu00669	0	0	0	0	0	0	0	0	0	0	0	0	0	0	0	0	0	0
Otu00670	0	2	3	0	0	1	0	0	5	1	1	0	0	0	2	0	0	4
Otu00671	9	0	0	0	0	0	0	0	1	0	7	0	0	0	0	0	0	0
Otu00672	0	0	0	0	0	0	0	0	0	0	0	0	0	0	0	0	0	0
Otu00673	0	0	0	0	0	0	0	0	0	0	0	0	0	0	0	0	0	0
Otu00674	0	0	0	0	0	0	0	32	0	0	0	0	0	0	0	0	0	0
Otu00675	0	1	0	2	1	0	0	1	0	0	2	0	0	1	0	1	0	0
Otu00676	0	5	0	4	0	1	2	0	2	0	1	2	1	0	1	0	1	0
Otu00677	0	0	0	0	2	0	0	5	0	0	5	0	0	4	0	9	0	0
Otu00678	0	0	0	0	0	0	0	0	0	0	0	0	0	0	0	0	0	1
Otu00679	0	0	1	0	0	0	3	0	0	3	0	3	0	1	0	0	1	0
Otu00680	0	0	2	0	0	0	0	0	0	1	13	0	0	2	0	0	0	6
Otu00681	0	0	0	0	0	0	0	0	0	0	0	0	0	0	0	0	0	0
Otu00682	2	0	6	0	0	0	5	0	0	0	7	0	0	3	0	0	0	0
Otu00683	0	0	0	0	0	0	0	0	0	0	0	0	0	0	0	0	5	0
Otu00684	0	0	0	1	0	2	0	0	0	8	11	0	0	6	0	0	0	2
Otu00685	0	0	0	0	3	0	0	0	0	0	3	0	0	0	0	1	0	0
Otu00686	7	2	2	0	0	1	0	0	4	1	0	4	2	2	0	0	0	0
Otu00687	0	5	0	0	0	0	0	0	0	0	0	0	8	0	5	0	0	0
Otu00688	0	0	0	2	0	0	0	7	0	1	0	1	0	1	0	0	1	1
Otu00689	0	1	0	1	0	0	0	2	0	0	0	0	0	3	0	3	0	0
Otu00690	0	0	0	0	0	0	0	0	0	0	0	0	0	0	0	0	0	0
Otu00691	0	0	1	0	0	0	0	0	1	0	1	0	0	2	1	6	1	0
Otu00692	0	1	3	2	1	0	3	2	0	0	1	0	1	0	0	0	0	0
Otu00693	5	2	0	0	1	2	1	0	0	3	0	0	0	0	0	0	0	0
Otu00694	0	7	0	0	2	0	0	0	0	0	0	0	0	17	0	0	0	1
Otu00695	0	0	0	0	3	0	0	2	0	0	0	0	0	0	0	0	1	0
Otu00696	1	0	3	0	0	0	12	0	0	2	0	0	0	0	1	0	1	1
Otu00697	0	1	0	11	0	1	0	0	0	0	0	0	0	0	0	0	3	0
Otu00698	0	2	0	1	1	0	1	0	1	1	0	5	1	0	0	0	0	4
Otu00699	0	0	0	6	1	0	1	0	1	0	0	0	0	2	1	0	1	0
Otu00700	1	0	2	0	2	3	2	0	0	0	0	3	0	0	0	0	0	0
Otu00701	0	0	0	1	0	0	0	0	0	2	0	0	0	0	0	0	0	0
Otu00702	0	0	0	0	0	0	0	0	0	0	6	1	1	5	0	3	0	0
Otu00703	0	0	0	0	0	0	0	0	0	0	0	0	0	0	0	0	0	0
Otu00704	0	0	0	1	0	6	0	0	0	0	2	0	0	0	0	10	1	2
Otu00705	1	1	0	1	0	0	0	7	0	0	0	0	0	0	0	1	2	0
Otu00706	0	0	4	0	4	0	0	0	0	0	3	0	0	0	0	1	0	0
Otu00707	0	0	1	0	2	0	0	0	0	4	1	0	0	0	0	0	0	0
Otu00708	1	0	0	0	1	0	4	0	1	0	0	1	0	0	0	0	0	5
Otu00709	0	0	0	0	0	0	0	1	0	0	0	0	0	0	0	0	0	1
Otu00710	0	0	0	0	0	0	0	0	0	0	0	0	0	0	0	0	0	0
Otu00711	0	0	0	0	0	0	0	0	16	0	0	0	0	3	0	0	0	0
Otu00712	0	0	0	0	2	0	0	0	0	0	0	12	0	0	0	0	0	0
Otu00713	0	0	0	1	0	0	0	9	0	0	5	0	0	5	0	0	0	0
Otu00714	3	1	1	0	0	1	6	0	0	1	0	0	0	0	0	0	0	0
Otu00715	0	0	0	0	0	0	0	0	0	0	0	0	0	0	0	0	0	0
Otu00716	0	0	0	0	0	0	0	27	0	0	0	0	0	0	0	0	0	0
Otu00717	0	0	0	0	0	0	0	0	0	0	0	0	0	0	0	0	0	0
Otu00718	0	0	0	0	0	0	0	0	0	0	0	0	0	0	0	0	0	4
Otu00719	0	0	1	0	0	1	1	0	0	2	0	0	0	0	0	0	0	4
Otu00720	0	0	1	0	0	0	1	0	0	0	0	1	0	0	3	0	3	5
Otu00721	0	0	0	0	0	0	0	2	0	0	0	0	0	0	0	1	2	2
Otu00722	0	0	0	0	0	0	0	0	0	0	0	0	0	0	0	0	0	0
Otu00723	3	0	0	0	0	2	4	0	0	1	0	2	0	0	0	0	0	11
Otu00724	4	0	0	0	0	1	0	0	0	0	0	1	0	0	0	0	0	0
Otu00725	0	0	0	0	0	0	0	0	0	0	0	0	0	0	0	0	0	0
Otu00726	0	0	1	0	0	0	2	0	0	0	0	0	0	0	0	0	0	0
Otu00727	2	0	3	0	0	0	3	0	0	1	0	5	0	0	0	0	0	0
Otu00728	0	0	0	0	0	0	0	0	0	0	0	0	0	0	0	0	0	0
Otu00729	0	0	1	4	0	1	1	0	0	0	0	0	0	2	2	0	1	0
Otu00730	0	3	0	8	0	0	0	0	0	0	2	0	0	6	0	0	0	4
Otu00731	0	1	2	0	0	0	0	1	0	0	0	0	1	0	0	0	4	0
Otu00732	4	0	0	0	0	1	3	0	0	0	0	0	0	0	0	0	0	0
Otu00733	4	0	0	1	2	1	0	0	1	0	0	2	0	0	2	0	0	0
Otu00734	2	0	3	2	1	2	0	0	5	1	0	0	0	0	0	0	0	0
Otu00735	0	1	0	17	0	0	1	0	0	0	0	0	0	0	0	0	2	0
Otu00736	0	0	1	0	0	0	0	0	1	0	0	0	0	0	0	0	0	4
Otu00737	0	0	0	0	0	0	0	0	5	0	0	0	0	0	0	0	2	0
Otu00738	0	0	1	7	0	0	3	0	1	0	3	0	0	0	1	0	0	0
Otu00739	2	0	7	0	1	0	0	0	0	2	0	0	0	0	1	0	0	2
Otu00740	0	8	0	0	0	0	0	0	0	0	2	0	0	0	0	8	0	0
Otu00741	0	0	0	0	2	0	1	0	0	0	1	0	0	1	0	0	1	0
Otu00742	0	0	0	0	0	0	0	0	0	0	0	0	0	0	0	0	0	0
Otu00743	0	0	1	0	0	0	0	0	2	1	0	3	0	0	0	0	0	2
Otu00744	0	0	1	0	0	0	0	0	0	0	0	2	0	0	0	0	0	0
Otu00745	0	0	0	6	0	0	2	0	2	0	0	0	3	0	0	0	4	2
Otu00746	0	0	0	2	1	0	1	0	0	0	0	5	0	0	0	1	1	0
Otu00747	0	1	1	0	0	0	0	0	0	0	1	0	0	0	0	0	0	4
Otu00748	0	0	0	0	0	0	0	0	0	0	1	0	0	0	0	0	3	0
Otu00749	0	0	0	0	0	0	0	0	0	0	0	0	0	0	0	0	0	0
Otu00750	1	0	0	0	0	2	0	0	0	2	3	1	0	2	0	0	0	2
Otu00751	1	4	0	1	0	0	0	0	0	1	1	0	0	0	0	0	0	0
Otu00752	1	0	0	0	0	0	7	0	0	0	0	4	0	0	1	0	0	0
Otu00753	0	0	0	0	0	0	0	23	0	0	0	0	0	0	0	0	0	0
Otu00754	0	0	0	0	0	0	0	0	0	0	0	0	0	0	0	0	0	0
Otu00755	0	0	0	0	0	0	0	0	0	0	1	0	0	0	0	0	0	0
Otu00756	0	0	0	0	0	3	0	0	6	0	0	3	0	4	0	0	0	0
Otu00757	0	0	1	0	0	0	0	0	0	0	0	0	0	0	0	1	2	0
Otu00758	1	0	0	0	0	0	1	0	0	0	0	0	0	1	0	1	0	1
Otu00759	0	0	3	0	1	0	4	0	0	0	0	2	0	0	1	0	0	1
Otu00760	1	0	1	0	0	0	0	0	0	1	0	3	0	0	0	0	0	0
Otu00761	0	1	1	0	0	0	0	0	1	0	0	2	0	1	0	1	1	5
Otu00762	0	0	0	0	0	0	11	0	0	0	0	0	0	0	0	0	0	3
Otu00763	0	0	0	0	0	0	0	0	0	1	1	0	0	1	0	0	0	0
Otu00764	0	0	0	0	0	1	0	0	0	0	0	0	0	0	0	0	0	0
Otu00765	0	0	0	0	0	0	0	0	0	0	0	0	0	0	0	0	0	0
Otu00766	0	0	0	0	0	0	0	5	0	0	1	0	1	0	0	0	0	0
Otu00767	0	0	1	0	0	1	2	0	2	6	3	0	0	1	0	0	0	2
Otu00768	0	0	0	0	0	0	0	0	0	0	0	0	0	4	0	0	0	0
Otu00769	0	0	0	0	0	1	0	0	1	1	1	0	0	2	0	0	2	0
Otu00770	0	0	0	0	0	0	0	0	0	0	3	0	0	0	0	0	0	0
Otu00771	0	0	0	4	1	1	0	0	0	0	0	2	0	0	0	2	0	0
Otu00772	0	0	0	0	4	0	0	0	0	0	0	0	0	0	0	0	0	0
Otu00773	1	0	0	0	0	2	0	0	0	0	0	2	0	1	8	0	0	2
Otu00774	0	0	0	0	0	0	0	0	5	0	0	0	0	0	0	0	0	12
Otu00775	2	0	1	0	0	3	2	0	2	0	0	0	0	0	3	0	0	0
Otu00776	0	0	1	0	0	0	0	0	2	4	0	0	0	1	0	0	0	0
Otu00777	0	0	0	0	0	0	0	0	0	0	0	0	0	0	0	0	0	0
Otu00778	0	0	0	0	0	2	0	0	4	0	2	0	0	1	0	0	1	0
Otu00779	0	0	1	0	0	1	2	0	0	0	0	0	0	0	6	0	0	0
Otu00780	0	0	0	0	0	0	0	0	0	0	0	0	0	0	0	0	0	1
Otu00781	2	1	6	0	0	0	0	0	0	0	0	0	0	1	0	0	5	4
Otu00782	0	0	0	0	0	0	0	0	0	0	0	0	0	0	0	0	0	0
Otu00783	0	0	1	0	2	1	0	0	3	0	1	0	0	3	0	0	0	3
Otu00784	0	0	1	2	0	0	0	0	0	1	0	0	1	0	0	0	2	0
Otu00785	0	0	0	0	0	0	0	0	0	0	0	0	0	0	0	0	0	0
Otu00786	1	0	0	0	0	2	0	0	0	0	1	0	9	6	0	0	0	1
Otu00787	0	0	0	0	2	0	0	1	0	0	7	0	0	2	0	0	0	0
Otu00788	0	0	0	0	0	0	0	0	0	0	0	0	0	0	0	0	0	0
Otu00789	0	0	0	0	0	0	0	0	0	4	8	0	0	3	0	0	0	0
Otu00790	1	0	0	0	0	0	0	0	0	0	0	1	0	0	0	0	0	1
Otu00791	0	0	0	0	0	0	0	0	0	0	0	0	0	0	0	0	0	0
Otu00792	0	0	0	0	1	0	0	0	0	0	0	0	0	2	6	0	0	0
Otu00793	0	0	0	0	0	0	0	0	0	0	0	0	0	0	0	0	0	0
Otu00794	0	0	0	0	0	0	0	0	0	0	0	0	0	0	0	0	0	0
Otu00795	1	0	1	0	0	1	0	0	0	0	0	1	0	0	2	0	0	0
Otu00796	0	0	1	0	0	0	0	1	0	0	3	0	0	5	0	0	0	2
Otu00797	0	0	0	0	0	0	0	0	15	0	0	0	1	0	0	0	4	0
Otu00798	0	0	1	1	0	0	0	0	1	0	2	0	0	0	0	1	2	0
Otu00799	0	0	0	0	0	0	0	0	0	0	0	0	0	0	0	0	0	0
Otu00800	0	0	0	0	4	0	0	0	0	0	0	0	0	0	0	0	0	2
Otu00801	0	0	1	0	5	0	0	0	0	0	0	0	0	2	0	0	0	0
Otu00802	0	2	0	0	0	0	1	1	4	0	0	0	0	0	0	0	0	0
Otu00803	0	0	0	0	0	0	0	0	0	0	0	0	0	0	0	0	0	0
Otu00804	0	0	0	0	1	0	0	0	0	0	0	0	0	0	0	0	0	0
Otu00805	0	0	2	0	1	2	2	0	0	1	0	2	0	0	3	0	0	0
Otu00806	0	0	0	0	0	0	0	1	0	0	0	1	1	0	0	2	1	1
Otu00807	4	0	0	0	0	0	0	0	0	0	0	0	0	0	0	0	0	1
Otu00808	0	0	1	3	0	0	0	4	0	1	0	0	0	0	0	1	0	0
Otu00809	0	2	4	0	0	0	0	0	2	0	0	0	0	0	0	0	2	0
Otu00810	0	0	0	0	0	0	0	0	0	0	0	0	0	0	0	0	0	0
Otu00811	1	0	1	0	0	1	0	0	2	0	0	3	0	0	1	0	0	0
Otu00812	0	2	0	0	1	0	0	0	0	0	6	0	0	0	0	0	0	3
Otu00813	0	0	0	0	0	0	0	0	0	0	4	0	0	0	0	0	0	0
Otu00814	0	0	0	0	0	0	0	0	0	0	0	0	0	0	0	0	0	0
Otu00815	1	0	1	0	3	0	0	0	0	0	0	0	0	0	0	0	0	0
Otu00816	0	0	0	0	1	0	0	0	0	5	0	0	0	0	0	0	0	3
Otu00817	0	0	0	0	0	0	0	9	0	1	0	0	0	1	0	0	0	0
Otu00818	0	0	0	0	0	1	3	0	0	0	0	0	0	0	0	0	0	0
Otu00819	0	0	0	1	0	0	0	1	1	0	0	0	0	0	2	1	3	0
Otu00820	0	0	0	0	0	0	0	0	0	0	2	0	0	1	0	0	0	0
Otu00821	0	0	0	0	0	0	0	0	0	0	0	0	0	0	0	0	0	0
Otu00822	0	0	0	0	0	0	0	0	0	0	0	0	0	0	0	0	0	0
Otu00823	0	0	0	1	0	0	0	2	2	0	0	0	0	2	0	0	1	0
Otu00824	0	0	1	0	1	0	1	0	1	1	0	2	0	0	0	3	0	2
Otu00825	0	0	0	0	0	0	0	3	0	0	0	0	0	0	0	1	1	1
Otu00826	0	0	0	0	0	0	0	0	0	2	0	0	0	2	0	0	0	0
Otu00827	2	0	2	0	0	0	1	0	0	1	0	1	0	0	3	0	0	0
Otu00828	0	0	0	0	0	0	0	0	0	0	0	0	0	0	0	0	0	0
Otu00829	4	0	2	0	0	0	1	0	0	0	0	0	0	0	0	0	1	7
Otu00830	0	0	0	0	0	1	0	0	5	0	0	0	0	0	0	0	0	0
Otu00831	0	0	0	0	0	0	0	0	0	0	0	0	0	0	0	0	0	0
Otu00832	0	0	0	0	0	0	0	1	0	0	1	0	1	0	0	0	0	1
Otu00833	0	0	0	2	0	2	0	1	0	0	1	2	0	1	1	0	0	1
Otu00834	0	0	0	3	0	0	0	0	0	0	1	0	0	0	11	0	0	0
Otu00835	2	0	1	0	3	1	4	0	0	1	0	0	0	0	0	0	0	2
Otu00836	1	0	0	0	0	1	0	0	1	2	3	0	0	3	0	0	0	0
Otu00837	0	0	0	0	0	0	0	0	2	0	8	0	0	2	0	0	0	0
Otu00838	0	0	0	0	0	0	0	0	0	0	13	0	0	0	0	0	0	0
Otu00839	0	0	0	0	0	0	0	0	0	0	0	0	0	0	0	0	0	0
Otu00840	0	0	0	0	0	0	0	0	0	0	0	0	0	0	0	0	0	0
Otu00841	0	0	1	0	1	1	0	0	1	0	1	0	0	0	1	1	1	0
Otu00842	2	0	0	0	6	0	3	0	0	0	0	0	0	0	0	0	2	0
Otu00843	0	0	0	0	0	0	0	19	0	0	0	0	0	0	0	0	0	0
Otu00844	0	0	0	0	0	0	0	0	0	0	0	0	0	0	0	0	0	0
Otu00845	0	0	3	0	0	0	0	0	0	0	0	2	0	0	5	0	0	1
Otu00846	0	0	0	0	0	0	0	0	0	0	0	0	0	0	0	0	0	0
Otu00847	0	0	0	0	0	0	0	0	0	0	0	0	0	0	0	0	0	0
Otu00848	0	0	0	2	0	4	0	0	0	1	2	2	0	0	1	0	2	2
Otu00849	0	0	1	0	2	0	14	1	0	1	0	0	0	0	0	0	0	0
Otu00850	0	0	1	0	0	1	0	0	0	0	3	0	0	1	0	0	0	0
Otu00851	0	0	0	1	2	1	0	0	0	0	0	0	0	0	0	0	0	2
Otu00852	0	0	0	0	0	0	0	0	0	0	0	0	0	0	0	0	0	0
Otu00853	0	0	0	0	0	0	0	0	0	0	0	0	0	0	0	0	0	0
Otu00854	0	0	0	3	2	0	0	0	0	0	0	0	1	1	0	2	0	0
Otu00855	1	0	1	1	1	3	3	0	1	0	0	1	0	0	2	0	0	2
Otu00856	0	0	0	1	0	0	0	0	0	1	0	1	0	1	0	1	0	0
Otu00857	0	0	0	0	0	0	0	0	0	0	0	0	0	0	0	11	0	0
Otu00858	2	0	0	0	2	0	0	0	0	0	0	0	0	0	0	0	0	0
Otu00859	0	0	0	0	0	0	0	0	0	0	0	0	0	3	0	0	0	0
Otu00860	0	0	0	0	0	0	0	0	0	0	0	0	0	0	0	0	0	0
Otu00861	0	0	0	0	0	0	0	2	0	0	0	0	0	2	0	0	0	0
Otu00862	0	0	1	0	0	0	0	5	0	0	2	1	0	0	1	0	1	1
Otu00863	0	1	4	3	0	0	0	1	0	0	0	0	0	0	0	0	3	1
Otu00864	0	1	4	0	0	1	1	0	0	0	0	0	0	0	0	0	0	4
Otu00865	0	0	0	0	0	0	0	0	0	1	0	0	0	0	0	0	2	2
Otu00866	0	0	0	0	1	0	0	0	0	0	0	0	0	0	0	0	0	0
Otu00867	0	0	1	1	0	0	0	0	0	0	0	0	0	0	0	0	1	1
Otu00868	0	0	0	0	0	0	3	0	0	0	0	0	0	0	11	0	0	0
Otu00869	0	0	2	0	3	0	0	0	0	0	0	0	0	0	0	0	0	1
Otu00870	0	0	0	3	0	0	0	0	0	0	3	0	0	1	3	0	0	0
Otu00871	0	0	0	0	0	0	0	1	0	0	0	0	0	0	0	0	0	0
Otu00872	0	0	1	0	0	0	3	0	0	0	1	0	0	0	7	0	0	1
Otu00873	2	0	2	0	0	0	1	0	0	0	0	0	0	0	0	0	0	2
Otu00874	0	0	0	1	0	1	0	0	0	3	0	0	0	0	0	0	3	3
Otu00875	0	1	0	1	0	0	1	2	0	0	1	0	0	0	1	0	0	2
Otu00876	1	0	0	0	0	1	0	0	4	3	0	0	0	3	0	1	0	0
Otu00877	0	0	0	0	1	1	0	0	0	0	0	1	0	0	0	0	0	0
Otu00878	4	0	0	0	0	0	0	0	0	0	0	1	0	0	0	0	0	2
Otu00879	0	2	1	0	0	0	0	0	0	0	2	0	0	0	0	0	2	0
Otu00880	0	0	0	0	0	0	0	0	0	0	0	0	0	0	0	0	0	0
Otu00881	0	1	0	0	1	1	2	0	0	0	0	1	0	0	0	0	0	0
Otu00882	1	0	2	0	1	0	0	0	2	1	4	0	0	0	0	0	0	0
Otu00883	1	0	0	0	1	1	4	0	0	0	0	0	0	0	0	0	0	1
Otu00884	1	0	0	0	0	1	0	0	0	0	0	1	0	0	0	0	0	3
Otu00885	0	0	3	0	0	0	0	0	0	0	0	0	0	0	0	1	0	1
Otu00886	0	0	0	0	0	0	0	0	0	0	0	0	0	0	0	1	0	0
Otu00887	0	0	0	0	0	0	0	0	0	0	0	0	0	0	0	0	2	0
Otu00888	4	0	1	0	0	0	1	0	0	0	3	0	0	0	0	0	0	2
Otu00889	3	0	2	0	0	0	0	0	1	0	0	0	0	0	0	0	0	0
Otu00890	0	0	0	0	0	0	0	0	0	0	0	0	0	0	0	0	0	0
Otu00891	8	0	1	0	0	0	2	0	0	0	0	0	0	0	0	0	0	0
Otu00892	0	0	0	0	0	1	0	0	0	0	0	0	0	2	0	5	0	0
Otu00893	0	0	0	1	0	0	0	0	0	0	0	0	0	1	7	0	0	0
Otu00894	0	0	0	0	0	0	0	0	0	0	0	0	0	0	0	0	0	0
Otu00895	0	0	1	1	0	1	0	0	0	0	0	0	0	0	0	2	4	0
Otu00896	0	0	0	0	0	0	0	0	0	0	0	0	0	0	0	18	0	0
Otu00897	2	1	0	0	0	0	0	1	1	0	0	1	0	0	0	0	1	1
Otu00898	1	0	0	2	0	0	0	0	0	0	1	0	0	0	1	0	0	0
Otu00899	0	0	0	0	0	0	0	0	0	0	0	0	0	1	0	8	0	0
Otu00900	0	0	0	0	0	0	0	0	0	0	0	0	1	1	0	0	0	0
Otu00901	0	0	0	0	0	0	0	0	5	0	0	0	0	0	12	0	0	0
Otu00902	0	0	0	0	0	0	0	0	0	0	0	0	0	0	0	0	0	0
Otu00903	0	0	3	0	1	1	1	0	0	0	0	0	0	0	0	0	1	2
Otu00904	1	0	1	1	0	2	3	0	0	1	1	0	0	0	0	0	0	0
Otu00905	0	0	0	0	0	0	0	0	0	0	0	0	0	0	0	17	0	0
Otu00906	1	0	4	0	0	1	0	0	0	0	0	2	0	0	0	0	0	0
Otu00907	0	0	0	4	0	0	1	0	0	2	1	0	0	0	0	0	1	0
Otu00908	0	1	0	0	0	0	0	0	0	1	1	0	0	0	1	0	1	0
Otu00909	0	0	3	0	0	0	1	0	0	0	0	0	0	0	0	0	0	0
Otu00910	0	0	0	0	0	0	0	0	0	0	2	0	0	0	0	1	0	0
Otu00911	0	0	0	0	0	1	0	4	0	0	0	0	0	1	0	0	0	1
Otu00912	0	0	0	0	0	0	0	0	0	0	5	0	0	0	0	0	0	0
Otu00913	0	0	0	0	0	0	0	6	0	0	0	0	0	0	0	0	0	0
Otu00914	2	4	0	0	0	1	0	0	0	0	0	0	0	0	0	0	0	0
Otu00915	0	0	0	0	0	0	0	1	1	5	1	1	0	0	0	1	0	0
Otu00916	0	0	0	0	0	0	0	0	0	0	0	0	0	0	0	0	0	0
Otu00917	0	0	0	0	0	0	0	0	0	0	0	0	0	0	0	0	0	0
Otu00918	0	0	0	0	0	0	0	0	0	0	6	0	0	0	8	0	0	0
Otu00919	0	0	0	1	1	0	0	0	0	0	0	0	0	0	0	0	0	0
Otu00920	0	0	0	0	0	0	0	0	2	0	1	0	0	1	2	0	0	0
Otu00921	0	0	0	0	0	0	1	0	0	0	1	0	0	0	0	0	0	0
Otu00922	0	0	0	2	0	1	0	0	0	0	5	0	0	1	0	0	0	0
Otu00923	0	0	0	1	1	1	2	0	2	1	1	0	0	2	0	0	0	0
Otu00924	0	0	0	0	0	0	0	2	0	0	12	0	0	0	0	0	0	0
Otu00925	0	0	0	0	0	0	0	0	4	2	0	3	0	0	4	0	0	0
Otu00926	0	0	0	3	0	1	1	2	0	0	0	0	0	0	0	1	0	0
Otu00927	0	0	0	0	0	0	0	0	0	0	0	0	0	0	0	0	0	0
Otu00928	1	0	4	0	4	0	0	0	0	0	0	0	0	0	1	0	0	1
Otu00929	0	0	1	1	0	0	0	0	0	0	1	0	0	1	0	0	1	0
Otu00930	0	0	0	0	0	6	0	0	0	0	3	0	0	1	0	0	0	0
Otu00931	2	0	0	0	0	0	2	0	0	0	0	0	0	0	0	0	0	0
Otu00932	1	0	0	0	0	0	0	0	0	0	0	0	0	0	0	0	0	5
Otu00933	0	0	0	0	0	0	0	0	0	0	0	0	0	0	0	0	0	0
Otu00934	0	1	0	0	0	1	0	0	0	11	0	2	0	0	0	0	0	1
Otu00935	3	0	0	0	1	0	0	0	0	0	0	0	0	0	0	0	0	0
Otu00936	0	0	0	0	2	0	0	0	2	0	0	2	0	0	0	0	0	0
Otu00937	0	3	0	0	0	0	0	0	0	0	0	0	0	5	0	0	0	0
Otu00938	0	0	0	0	1	0	0	0	0	0	0	0	0	1	2	3	0	2
Otu00939	0	0	0	0	0	0	0	0	0	0	2	0	0	0	0	0	2	0
Otu00940	0	0	0	0	0	0	0	0	0	0	0	0	0	0	0	0	0	0
Otu00941	0	0	0	0	0	0	0	0	0	0	0	0	16	0	0	0	0	0
Otu00942	0	0	0	0	1	0	1	0	0	0	3	0	0	0	0	0	0	0
Otu00943	1	0	1	0	0	0	1	0	4	3	2	0	0	0	0	0	0	0
Otu00944	0	0	4	0	0	0	0	0	0	0	0	0	0	0	1	0	0	0
Otu00945	0	0	0	0	0	0	0	0	0	0	3	0	0	1	0	0	5	0
Otu00946	0	2	1	1	0	0	1	0	2	0	5	0	0	0	0	0	0	0
Otu00947	0	0	0	0	0	0	0	0	0	0	0	0	0	0	0	16	0	0
Otu00948	0	0	0	0	0	4	0	1	0	0	3	0	0	2	5	0	0	0
Otu00949	0	0	0	1	1	0	0	0	1	0	1	0	0	2	0	0	0	0
Otu00950	0	0	0	0	0	0	0	1	0	0	1	0	0	0	0	2	3	0
Otu00951	0	0	0	0	0	0	0	0	0	0	0	0	0	0	0	0	0	0
Otu00952	1	0	0	0	0	0	0	0	0	0	0	0	1	1	0	0	0	0
Otu00953	0	0	0	0	0	0	0	0	0	0	0	0	0	0	0	16	0	0
Otu00954	0	0	0	1	0	1	0	0	0	0	1	0	1	1	0	1	1	3
Otu00955	0	0	5	0	0	1	0	0	0	1	0	0	0	0	0	0	0	2
Otu00956	0	0	0	0	0	0	0	0	0	0	0	0	0	0	1	0	0	0
Otu00957	0	0	0	0	0	0	0	0	0	0	10	0	0	0	0	0	0	3
Otu00958	0	0	0	1	0	0	0	2	1	2	0	0	0	5	0	0	0	0
Otu00959	0	3	0	0	0	0	0	0	0	0	0	0	0	0	0	12	0	0
Otu00960	0	0	0	0	0	0	0	0	4	0	3	0	0	0	0	0	0	0
Otu00961	2	0	3	0	0	0	0	0	1	0	0	5	0	0	0	0	0	0
Otu00962	0	0	1	0	0	1	0	0	0	0	0	1	0	0	2	0	0	0
Otu00963	5	0	0	2	0	0	0	0	0	0	0	0	0	0	0	0	1	0
Otu00964	0	0	0	0	0	0	0	0	0	0	0	0	0	0	0	6	0	0
Otu00965	0	0	1	1	0	0	0	1	0	0	0	1	0	0	0	0	0	1
Otu00966	0	0	0	0	0	0	0	0	0	0	0	0	0	0	0	0	0	0
Otu00967	0	0	0	1	0	0	0	0	3	0	2	0	0	2	0	1	0	0
Otu00968	0	0	0	0	0	0	0	0	0	0	0	0	0	0	0	0	0	0
Otu00969	0	3	0	4	0	0	2	0	0	0	0	0	0	0	0	0	2	0
Otu00970	0	0	0	0	0	0	0	0	0	0	0	0	0	0	0	0	0	1
Otu00971	0	0	0	0	0	0	0	0	0	2	0	0	0	1	0	0	0	0
Otu00972	0	0	0	0	6	0	0	0	0	0	0	0	0	0	0	0	0	0
Otu00973	2	0	3	0	0	2	0	0	1	0	0	0	0	0	0	0	0	3
Otu00974	0	0	3	1	1	1	1	0	4	0	0	0	0	0	0	0	0	1
Otu00975	5	0	0	0	0	0	1	0	0	0	0	0	0	0	0	0	0	0
Otu00976	0	0	2	0	0	1	0	0	1	1	1	4	0	0	0	0	0	1
Otu00977	0	0	1	0	0	1	0	0	0	0	0	0	0	0	0	0	0	1
Otu00978	0	0	0	0	0	0	0	0	1	0	3	0	0	2	0	0	0	0
Otu00979	0	0	0	0	1	0	0	1	0	0	2	0	0	2	0	1	0	0
Otu00980	2	0	0	0	0	0	2	0	0	0	0	7	0	0	0	0	0	0
Otu00981	0	0	0	0	0	0	0	0	0	0	0	0	0	0	0	0	0	0
Otu00982	0	2	0	0	3	0	0	0	0	2	0	0	0	0	8	0	0	0
Otu00983	0	0	0	1	0	0	0	0	0	0	0	0	0	1	1	1	0	0
Otu00984	0	0	0	0	0	0	0	0	0	0	0	0	0	0	0	0	0	0
Otu00985	1	1	5	0	0	0	3	0	0	0	0	0	0	0	0	0	0	0
Otu00986	0	2	2	0	0	5	0	0	0	1	2	0	0	0	0	0	0	0
Otu00987	0	0	0	0	0	0	0	0	0	0	0	0	0	0	0	0	0	0
Otu00988	0	0	0	0	0	0	0	0	0	0	0	0	0	0	0	0	0	0
Otu00989	0	0	1	0	0	0	0	0	0	0	0	1	0	0	0	0	0	2
Otu00990	0	0	0	0	0	0	0	5	0	0	0	0	0	0	0	0	0	0
Otu00991	0	0	0	0	0	0	0	14	0	0	0	0	0	0	0	0	0	0
Otu00992	0	0	0	0	0	0	0	0	0	0	0	0	0	0	0	0	0	0
Otu00993	0	0	1	0	0	0	0	0	0	0	0	0	0	0	0	0	0	0
Otu00994	0	0	0	0	0	1	0	0	0	0	4	0	0	5	0	0	0	0
Otu00995	0	2	0	0	1	0	1	0	0	0	0	0	0	0	0	0	2	0
Otu00996	0	0	1	0	0	0	0	0	3	3	0	0	0	0	0	0	0	0
Otu00997	0	0	0	0	0	0	0	0	0	0	0	0	0	0	0	14	0	0
Otu00998	0	0	0	0	0	4	0	0	0	9	0	0	0	0	0	0	0	0
Otu00999	0	0	0	0	0	0	1	0	0	0	0	0	0	0	5	0	0	0
Otu01000	0	0	0	0	0	0	0	0	0	0	0	0	0	0	0	0	0	0
Otu01001	0	0	0	0	0	0	1	0	0	0	2	0	0	0	3	0	0	0
Otu01002	0	0	0	0	0	0	0	0	0	0	0	0	0	0	0	0	0	0
Otu01003	0	0	0	0	0	0	0	0	0	0	0	0	0	0	0	0	0	0
Otu01004	0	0	0	0	0	0	0	0	0	0	0	0	0	1	0	0	13	0
Otu01005	0	0	0	0	0	0	0	2	0	0	1	0	0	0	0	2	0	0
Otu01006	0	0	0	0	0	0	0	0	0	0	0	0	0	0	0	0	0	0
Otu01007	0	0	4	0	0	1	0	0	0	0	0	0	0	0	0	0	0	9
Otu01008	1	0	0	0	1	0	0	1	0	0	0	0	0	0	1	0	1	1
Otu01009	0	0	0	1	3	0	0	0	1	0	0	0	0	0	0	0	0	0
Otu01010	0	0	0	0	0	0	0	14	0	0	0	0	0	0	0	0	0	0
Otu01011	0	0	0	0	0	1	1	0	0	0	0	0	0	0	0	0	0	0
Otu01012	0	0	0	0	0	0	1	0	1	0	2	0	0	0	0	0	0	0
Otu01013	0	0	1	2	0	0	0	2	0	0	0	0	0	0	0	1	0	0
Otu01014	1	0	0	0	0	0	0	0	0	0	0	0	0	0	0	0	0	2
Otu01015	0	0	0	0	0	0	0	0	0	0	0	0	0	0	0	0	0	0
Otu01016	0	0	0	0	0	1	0	0	0	4	0	0	0	1	0	0	0	0
Otu01017	0	0	0	0	0	0	0	0	0	0	0	0	0	0	0	0	0	0
Otu01018	0	1	0	0	0	2	0	0	0	0	4	0	0	3	0	1	0	0
Otu01019	0	0	0	0	0	0	0	0	4	0	1	0	0	0	0	0	0	0
Otu01020	0	1	0	0	2	1	0	2	0	0	0	1	0	0	0	0	0	0
Otu01021	0	0	0	0	0	0	0	0	0	0	2	0	0	6	0	0	0	1
Otu01022	0	0	0	0	0	0	0	0	0	0	0	0	0	0	0	0	0	0
Otu01023	3	0	0	0	1	0	0	0	0	0	0	0	0	0	0	0	0	0
Otu01024	0	0	1	0	0	0	0	0	1	0	0	0	0	0	0	0	0	10
Otu01025	4	3	0	0	0	0	0	0	0	0	1	0	0	0	0	0	0	2
Otu01026	0	0	0	0	0	0	0	0	0	0	0	0	0	0	0	0	0	0
Otu01027	0	0	0	0	0	0	0	0	0	0	0	0	0	0	0	0	0	0
Otu01028	0	0	0	1	1	0	0	1	0	0	0	0	0	4	0	0	0	0
Otu01029	0	0	0	1	0	0	0	0	0	0	0	0	0	0	0	1	0	0
Otu01030	0	0	1	0	0	0	0	0	0	0	0	0	0	0	0	0	0	0
Otu01031	0	0	0	0	0	0	0	0	0	0	0	0	0	0	0	0	0	0
Otu01032	0	1	0	10	0	0	0	0	0	0	0	0	0	0	0	0	2	0
Otu01033	0	0	0	0	0	0	0	0	0	0	0	0	1	0	0	0	0	0
Otu01034	1	0	0	0	0	0	0	0	0	0	0	0	0	0	1	0	0	0
Otu01035	0	0	0	3	0	0	0	0	0	1	0	0	0	1	0	0	2	0
Otu01036	0	0	0	0	0	0	0	0	0	0	0	0	0	0	0	0	0	0
Otu01037	0	0	0	0	0	0	0	0	0	1	0	0	0	0	0	3	0	0
Otu01038	0	0	0	0	0	0	0	0	0	0	0	0	0	0	0	0	0	0
Otu01039	2	0	3	0	0	1	1	0	0	0	0	1	0	0	1	0	0	0
Otu01040	1	0	0	1	0	0	0	1	0	0	0	1	0	0	0	1	0	0
Otu01041	0	0	0	0	1	8	0	0	0	0	0	0	0	0	0	0	0	0
Otu01042	0	0	0	0	0	0	1	0	0	0	1	1	0	0	0	2	1	2
Otu01043	0	0	0	0	0	0	0	0	0	0	0	0	0	0	0	0	0	0
Otu01044	0	0	0	0	0	0	0	1	0	1	0	1	1	0	0	2	0	0
Otu01045	1	0	0	2	0	0	0	0	2	0	0	0	0	0	0	0	0	1
Otu01046	0	0	0	0	0	0	0	0	0	0	0	0	0	0	0	0	0	0
Otu01047	0	0	0	0	0	0	0	0	0	0	0	0	0	0	0	0	0	0
Otu01048	0	0	0	0	0	0	0	0	0	0	0	0	0	0	0	13	0	0
Otu01049	0	0	0	0	0	0	0	0	0	0	0	0	0	0	0	0	0	0
Otu01050	0	0	0	0	0	0	0	0	0	0	0	0	0	0	0	0	0	1
Otu01051	1	0	0	1	1	1	0	0	0	0	0	0	0	0	0	0	0	0
Otu01052	0	0	2	0	2	0	0	0	1	0	0	0	1	0	0	0	0	0
Otu01053	0	0	1	0	2	0	0	0	0	0	0	0	0	0	1	0	0	3
Otu01054	0	0	0	0	0	0	0	0	0	0	0	0	0	0	0	0	0	0
Otu01055	0	0	0	0	0	0	0	0	0	0	0	0	0	0	0	0	0	0
Otu01056	0	0	0	0	0	0	0	0	0	0	0	0	0	3	0	0	0	0
Otu01057	0	3	0	0	0	1	0	1	3	0	0	0	0	2	0	1	0	0
Otu01058	0	1	4	0	0	0	0	0	0	0	0	1	0	0	0	0	0	0
Otu01059	1	0	0	1	0	0	0	0	0	0	1	0	0	0	0	0	0	0
Otu01060	0	0	1	0	0	0	1	0	0	0	0	0	0	0	9	0	0	0
Otu01061	0	0	0	0	0	0	0	0	0	0	0	0	0	0	0	0	0	0
Otu01062	0	0	0	0	0	0	0	0	0	0	0	1	0	0	0	0	0	1
Otu01063	0	1	0	0	0	1	1	0	0	0	0	1	2	2	1	0	0	0
Otu01064	0	0	1	0	0	0	1	0	0	0	0	0	0	0	0	0	0	0
Otu01065	0	0	0	0	0	2	2	0	0	0	0	0	0	0	1	0	0	0
Otu01066	0	0	0	0	0	0	0	0	0	0	0	0	0	0	0	0	0	0
Otu01067	2	0	0	0	0	0	2	0	0	0	0	0	0	0	0	0	0	0
Otu01068	3	0	2	0	4	0	0	0	0	0	0	0	0	0	0	0	0	0
Otu01069	2	0	2	0	0	0	1	0	0	0	0	0	0	0	0	0	0	2
Otu01070	0	0	0	0	0	0	1	0	0	0	0	0	0	0	0	0	0	2
Otu01071	0	0	1	0	0	0	0	0	2	0	0	0	0	0	0	0	0	0
Otu01072	1	0	0	1	0	0	1	0	0	0	0	0	0	0	0	0	1	0
Otu01073	0	0	0	0	0	0	0	0	0	0	0	1	0	0	1	0	0	1
Otu01074	1	0	0	0	0	1	0	0	0	0	0	0	0	0	0	0	0	1
Otu01075	0	9	0	0	0	0	0	0	0	0	2	0	0	0	0	0	0	0
Otu01076	0	0	0	0	2	0	3	0	0	0	0	0	0	0	0	0	0	4
Otu01077	0	0	0	0	0	0	0	0	0	0	0	0	0	0	0	0	0	0
Otu01078	0	0	2	0	2	4	0	0	0	1	0	0	0	0	0	0	0	0
Otu01079	0	0	0	9	0	0	0	0	0	0	0	0	0	0	0	0	0	0
Otu01080	0	0	2	0	0	0	0	0	0	0	0	0	0	0	0	0	0	0
Otu01081	0	0	0	0	0	0	0	0	0	2	0	0	0	0	0	0	0	3
Otu01082	0	0	0	0	0	0	0	0	0	0	0	0	0	0	0	0	0	0
Otu01083	0	0	0	0	0	0	0	0	0	0	0	0	0	0	0	0	0	0
Otu01084	0	0	0	0	0	0	0	0	0	0	0	0	0	0	0	0	1	2
Otu01085	1	0	0	1	3	0	0	0	0	0	0	0	0	0	0	0	0	0
Otu01086	0	0	1	0	0	0	0	0	1	0	0	0	0	0	0	1	0	1
Otu01087	0	0	0	0	0	0	0	0	0	0	0	0	0	0	0	0	0	0
Otu01088	0	0	0	0	1	0	0	0	0	0	0	0	0	0	0	0	0	0
Otu01089	0	0	0	0	0	0	0	0	0	0	0	0	0	0	0	0	0	0
Otu01090	0	0	0	1	0	0	0	0	0	0	0	0	0	0	0	0	0	0
Otu01091	0	0	1	2	1	0	1	0	0	0	0	0	0	0	0	1	0	0
Otu01092	2	0	0	4	1	0	0	0	0	0	0	0	0	0	2	0	0	0
Otu01093	0	0	0	0	0	0	0	0	0	0	0	1	0	0	0	0	0	0
Otu01094	0	0	0	2	0	0	0	1	0	0	0	0	1	0	0	1	0	0
Otu01095	0	0	0	0	0	0	0	0	0	0	0	0	0	0	0	0	0	0
Otu01096	0	0	0	0	0	0	0	0	0	0	0	0	0	0	0	0	0	0
Otu01097	0	0	1	0	0	0	1	0	0	0	0	2	0	1	0	0	0	0
Otu01098	0	0	0	0	0	0	0	0	0	0	0	0	0	0	0	0	0	0
Otu01099	0	1	0	1	0	0	0	2	0	0	0	0	0	0	0	0	0	0
Otu01100	0	0	0	0	0	0	0	0	0	1	0	0	0	0	0	0	0	0
Otu01101	0	0	1	0	0	0	0	0	0	0	0	0	0	0	0	0	0	1
Otu01102	5	0	0	0	0	3	0	0	0	0	1	0	0	0	0	0	0	0
Otu01103	0	0	0	0	0	0	0	0	0	0	0	0	0	0	0	0	0	0
Otu01104	0	0	0	1	0	0	0	0	1	0	0	0	0	0	1	0	0	0
Otu01105	0	0	0	0	0	0	0	0	0	0	0	0	0	0	0	0	0	0
Otu01106	0	0	5	0	0	0	0	0	0	0	0	1	0	0	2	0	0	1
Otu01107	1	0	1	2	0	0	0	0	0	0	0	0	0	0	0	0	0	0
Otu01108	0	0	0	1	0	0	0	0	0	0	0	0	0	0	0	0	0	1
Otu01109	0	0	0	0	0	0	1	0	0	0	0	0	0	0	0	0	0	0
Otu01110	0	0	0	0	0	0	0	0	0	3	6	0	0	0	0	3	0	0
Otu01111	0	0	0	0	1	0	0	0	0	0	0	0	0	0	0	0	0	0
Otu01112	0	0	0	0	1	1	0	0	0	0	0	0	0	0	0	0	0	1
Otu01113	0	0	0	0	0	0	0	0	0	0	1	0	0	0	0	0	0	0
Otu01114	0	0	0	1	0	0	0	0	0	0	0	0	0	1	0	0	0	0
Otu01115	0	0	0	0	0	0	0	0	0	0	0	0	0	0	0	0	0	0
Otu01116	1	0	0	0	0	0	0	0	0	0	0	0	0	0	0	0	1	0
Otu01117	0	0	0	1	1	3	0	0	1	1	0	1	0	0	0	0	0	0
Otu01118	0	0	0	0	0	0	0	6	0	1	0	0	0	0	0	0	0	1
Otu01119	0	0	2	0	0	0	1	0	0	0	0	1	0	0	1	0	0	1
Otu01120	0	0	0	0	0	0	0	0	0	0	0	0	0	0	0	0	0	0
Otu01121	0	0	0	0	0	0	0	0	0	0	0	0	0	0	0	0	0	0
Otu01122	0	0	0	0	0	0	0	0	0	4	0	0	0	0	0	0	0	0
Otu01123	0	0	0	0	0	5	3	0	0	0	0	1	0	0	0	0	0	0
Otu01124	0	0	2	0	0	0	0	1	2	4	0	0	0	0	0	0	0	0
Otu01125	1	0	1	0	0	0	0	0	0	0	0	0	0	0	4	0	0	2
Otu01126	0	0	0	1	0	0	0	0	0	0	0	0	0	0	0	0	0	0
Otu01127	0	0	0	0	0	0	0	0	0	0	0	0	0	0	0	0	0	0
Otu01128	0	0	0	0	0	0	0	0	1	0	0	1	1	0	0	0	0	1
Otu01129	0	0	3	0	0	0	0	0	2	0	0	0	0	0	2	1	1	1
Otu01130	0	0	0	0	0	0	1	0	0	0	0	1	0	1	3	0	0	0
Otu01131	0	0	1	0	0	0	0	0	1	0	6	0	0	0	0	0	0	0
Otu01132	0	0	0	0	2	0	0	0	0	1	0	0	0	0	0	0	0	0
Otu01133	0	0	0	0	0	0	0	0	0	0	0	0	0	0	0	7	0	0
Otu01134	0	0	0	0	0	0	0	0	0	0	0	0	0	0	0	0	0	0
Otu01135	0	0	0	0	0	0	0	0	0	0	0	0	0	0	0	0	0	0
Otu01136	0	0	0	0	0	0	0	0	0	0	0	0	0	0	0	0	0	0
Otu01137	0	11	0	0	0	0	0	0	0	0	0	0	0	0	0	0	0	0
Otu01138	0	0	0	0	0	0	0	0	0	0	0	0	0	0	0	0	0	0
Otu01139	0	0	0	0	0	0	0	0	0	0	0	0	0	0	1	0	0	0
Otu01140	8	0	0	0	0	0	0	0	0	0	1	0	0	0	0	0	0	0
Otu01141	0	1	0	0	2	0	4	0	0	1	0	0	0	0	0	0	0	0
Otu01142	0	0	0	0	0	0	0	0	0	0	0	0	0	0	0	0	0	0
Otu01143	0	0	0	0	0	0	1	1	0	0	0	0	0	0	0	0	0	1
Otu01144	0	0	0	0	0	0	0	0	0	3	0	0	1	0	0	0	0	0
Otu01145	1	0	0	1	0	1	0	0	1	0	0	0	0	0	0	0	2	0
Otu01146	1	1	2	0	0	1	0	0	0	0	0	2	0	0	0	0	0	0
Otu01147	1	0	0	0	0	0	0	0	0	0	0	0	0	1	1	1	1	2
Otu01148	0	0	0	0	0	0	0	0	0	0	0	0	0	0	0	0	0	0
Otu01149	0	0	0	2	0	0	0	1	1	0	0	0	0	0	0	0	2	1
Otu01150	1	0	0	0	0	0	0	0	0	0	0	3	0	0	0	0	0	0
Otu01151	0	0	0	0	0	0	0	0	0	0	2	6	0	0	0	0	0	0
Otu01152	0	0	0	0	0	0	0	0	0	0	0	0	0	0	0	0	0	0
Otu01153	0	0	0	0	0	0	0	0	0	0	0	0	0	0	0	8	0	0
Otu01154	0	0	0	0	0	0	0	0	0	0	0	0	0	0	0	0	0	0
Otu01155	0	0	2	0	2	0	0	0	0	0	0	0	0	0	0	0	0	0
Otu01156	0	0	0	0	0	0	0	0	0	0	0	4	0	0	0	0	0	0
Otu01157	0	0	0	0	0	0	1	0	0	0	1	0	1	0	0	0	0	0
Otu01158	0	0	0	0	0	0	0	0	0	0	0	0	0	0	0	0	0	0
Otu01159	1	0	0	0	0	0	1	0	0	0	0	0	0	0	1	0	0	0
Otu01160	0	0	0	0	0	0	1	0	0	1	5	0	0	2	0	0	0	0
Otu01161	0	0	0	1	0	2	0	0	0	0	0	0	0	0	0	0	0	0
Otu01162	0	0	0	0	1	0	0	0	1	0	0	0	0	0	0	2	0	1
Otu01163	1	0	0	0	0	0	0	0	0	0	0	0	0	0	1	0	0	0
Otu01164	0	5	0	0	1	0	0	0	0	0	0	0	0	0	0	0	0	0
Otu01165	0	0	0	0	0	0	0	0	0	0	0	0	0	0	0	0	0	0
Otu01166	0	0	0	0	1	0	2	0	0	0	0	0	0	0	0	0	0	0
Otu01167	0	0	0	0	0	0	0	0	0	0	0	0	0	0	0	0	0	0
Otu01168	0	0	0	0	0	0	0	0	0	0	0	0	0	0	0	0	0	0
Otu01169	0	0	0	0	0	0	0	0	0	0	1	1	0	0	0	2	0	0
Otu01170	0	0	0	3	0	0	1	1	0	2	0	0	0	0	0	1	1	0
Otu01171	0	0	0	0	0	0	0	0	0	0	0	2	0	0	0	0	0	0
Otu01172	0	0	0	1	0	0	0	0	0	0	0	0	0	0	1	0	1	3
Otu01173	0	0	0	0	0	0	0	8	0	0	0	0	0	0	0	0	0	0
Otu01174	0	0	1	0	0	0	0	0	3	1	0	1	0	0	0	0	0	1
Otu01175	0	0	0	0	2	0	0	0	0	0	0	0	0	0	1	0	0	0
Otu01176	0	0	0	0	0	0	2	0	0	1	0	0	1	0	0	0	0	0
Otu01177	1	0	1	0	0	0	1	0	0	0	0	0	0	0	0	0	0	2
Otu01178	1	0	0	0	0	0	0	0	1	0	0	1	0	0	1	0	0	3
Otu01179	1	0	1	0	0	0	0	0	0	0	0	2	0	0	0	0	0	0
Otu01180	0	0	1	2	0	0	0	0	0	1	0	0	0	0	0	0	1	0
Otu01181	0	0	0	2	0	0	0	0	0	0	0	0	0	0	0	0	1	2
Otu01182	0	0	0	0	0	0	0	10	0	0	0	0	0	1	0	0	0	0
Otu01183	0	0	0	0	0	0	0	0	1	0	0	0	0	2	0	0	0	1
Otu01184	0	0	1	0	0	0	0	0	0	0	0	0	0	0	0	0	1	0
Otu01185	0	0	0	0	0	0	0	0	0	0	0	0	0	0	0	1	0	0
Otu01186	0	0	0	0	0	0	0	0	0	0	0	0	0	0	0	0	0	0
Otu01187	0	0	0	0	0	0	0	0	1	3	0	0	0	0	0	0	0	0
Otu01188	0	0	0	0	0	0	0	0	0	0	0	0	0	0	0	0	0	0
Otu01189	1	0	0	0	0	0	0	4	0	0	0	0	0	1	0	0	0	0
Otu01190	0	0	0	0	0	0	0	0	0	0	0	0	0	0	0	0	0	0
Otu01191	0	0	0	0	0	0	0	1	0	0	0	0	0	0	0	1	0	0
Otu01192	0	0	0	0	0	0	0	0	0	0	0	0	0	0	0	0	0	0
Otu01193	0	0	0	1	0	1	1	0	0	0	0	1	0	0	0	0	1	3
Otu01194	0	0	0	0	0	0	0	0	0	0	0	0	0	0	0	0	0	0
Otu01195	0	0	0	5	0	0	0	0	0	0	0	0	0	0	4	0	0	0
Otu01196	0	0	0	0	0	0	0	0	0	0	3	0	0	0	0	0	0	0
Otu01197	0	0	0	1	0	0	0	3	0	0	0	0	0	0	0	0	0	0
Otu01198	0	1	1	1	0	0	0	3	0	0	0	0	0	0	0	1	0	0
Otu01199	0	0	0	0	0	0	0	0	0	0	0	0	0	0	0	0	0	0
Otu01200	0	0	0	0	0	0	0	0	0	2	0	0	0	0	1	0	2	0
Otu01201	0	0	0	0	0	0	1	0	3	1	1	1	0	0	0	0	0	0
Otu01202	0	0	0	0	0	0	0	0	0	1	3	0	0	0	0	0	0	0
Otu01203	1	0	0	0	0	0	0	0	0	0	0	0	0	0	0	0	0	1
Otu01204	0	0	1	0	0	1	0	0	0	0	0	1	0	0	1	0	0	1
Otu01205	0	0	0	0	0	0	0	0	0	0	10	0	0	0	0	0	0	0
Otu01206	0	2	0	0	0	0	1	0	1	0	0	2	0	0	0	0	0	0
Otu01207	1	0	0	0	0	0	0	0	0	0	0	0	0	0	0	0	0	0
Otu01208	0	0	0	1	0	0	0	6	0	0	0	0	0	0	0	0	0	0
Otu01209	0	0	0	0	0	0	0	0	0	3	0	0	7	0	0	0	0	0
Otu01210	0	0	0	0	0	0	0	0	0	0	10	0	0	0	0	0	0	0
Otu01211	0	0	2	0	0	0	2	0	0	0	0	1	0	0	2	0	0	0
Otu01212	0	0	1	1	1	1	0	0	0	0	1	0	0	0	0	0	1	0
Otu01213	0	0	0	0	2	0	0	0	0	0	0	0	0	0	0	0	0	3
Otu01214	1	0	0	0	0	0	0	0	0	0	0	0	0	0	0	0	0	0
Otu01215	0	0	1	0	0	0	0	0	0	0	0	0	0	0	0	0	0	2
Otu01216	0	0	0	0	0	0	0	0	0	0	0	0	0	0	0	0	0	0
Otu01217	0	0	0	0	0	0	0	0	0	0	0	0	0	0	0	0	0	0
Otu01218	0	0	0	1	0	1	0	0	1	0	0	0	0	0	0	0	1	0
Otu01219	0	0	0	0	0	0	0	0	0	0	3	1	0	3	0	0	0	0
Otu01220	0	0	0	0	0	0	0	0	0	0	0	0	0	0	0	0	0	0
Otu01221	0	0	0	0	0	0	0	0	0	0	0	0	0	0	0	0	0	0
Otu01222	0	0	0	0	0	0	0	0	0	6	0	0	0	0	0	0	0	0
Otu01223	0	0	0	0	2	0	0	0	0	0	0	0	0	0	0	0	0	0
Otu01224	0	0	1	0	0	0	1	0	1	0	0	2	0	0	1	0	0	0
Otu01225	0	0	0	0	0	0	0	0	0	0	0	0	0	0	0	0	0	0
Otu01226	0	2	3	0	0	0	0	0	0	2	0	0	1	2	0	0	0	0
Otu01227	0	0	0	0	0	0	0	0	0	0	0	0	0	0	0	0	0	0
Otu01228	0	3	0	0	0	1	0	0	0	0	0	5	0	0	0	0	0	0
Otu01229	0	0	0	0	0	0	0	0	0	0	0	0	0	0	0	0	0	0
Otu01230	0	0	0	0	0	0	0	0	0	0	0	0	0	0	0	0	0	0
Otu01231	0	0	0	0	0	2	0	0	0	0	0	0	0	0	3	0	0	0
Otu01232	0	0	0	1	0	0	0	0	0	0	2	0	0	0	0	0	0	0
Otu01233	0	0	0	0	0	0	0	0	0	0	0	0	0	0	0	0	0	0
Otu01234	0	0	2	0	1	0	1	0	0	0	0	0	0	0	0	0	1	0
Otu01235	0	0	0	0	2	1	0	0	0	0	0	0	0	0	0	1	0	0
Otu01236	0	0	0	0	0	2	0	0	0	0	3	0	0	0	0	0	0	0
Otu01237	0	0	0	0	2	0	0	0	0	0	0	0	0	0	0	0	0	0
Otu01238	0	0	0	0	0	0	0	0	0	0	0	0	0	0	0	0	0	0
Otu01239	1	0	0	0	0	0	0	0	0	0	4	0	0	0	0	0	0	0
Otu01240	0	0	0	0	0	0	0	0	0	0	0	0	0	0	0	0	0	0
Otu01241	0	0	0	0	0	0	0	0	0	0	0	0	0	0	0	0	0	0
Otu01242	0	0	0	0	0	0	0	0	0	0	0	0	0	0	0	0	0	0
Otu01243	0	0	0	0	0	0	2	0	1	0	0	0	0	0	0	0	0	0
Otu01244	0	0	0	0	0	0	0	0	0	0	0	0	0	0	0	0	0	0
Otu01245	0	0	0	0	0	0	0	0	0	0	0	0	0	0	0	0	0	0
Otu01246	0	1	1	0	0	0	0	0	0	0	0	0	0	0	0	0	0	0
Otu01247	2	0	0	0	1	0	0	0	0	0	0	0	0	0	0	0	0	3
Otu01248	0	0	0	0	0	0	0	0	3	0	1	1	0	0	0	0	0	3
Otu01249	0	0	0	0	0	0	0	0	0	0	0	0	0	0	0	0	0	1
Otu01250	0	0	0	0	0	0	3	0	1	0	0	0	0	0	0	0	0	0
Otu01251	0	0	0	0	0	0	0	0	0	0	0	0	0	0	0	0	0	0
Otu01252	0	0	0	0	0	0	0	0	0	0	0	0	0	0	0	0	0	0
Otu01253	0	0	0	0	0	0	0	0	0	0	0	0	0	0	0	0	0	0
Otu01254	0	0	0	1	1	0	0	0	0	0	1	0	0	3	0	0	0	0
Otu01255	0	1	1	1	0	0	0	0	0	0	0	0	0	0	0	0	0	0
Otu01256	0	0	0	0	0	0	0	0	0	0	0	0	0	0	0	0	0	0
Otu01257	0	0	0	0	0	2	0	0	0	0	0	0	0	0	0	0	0	0
Otu01258	0	0	0	0	0	0	0	0	0	0	0	0	0	0	0	0	0	0
Otu01259	0	0	0	0	0	0	0	0	0	0	0	0	0	0	0	0	0	0
Otu01260	1	0	4	0	0	0	0	0	0	0	0	0	0	0	0	0	0	0
Otu01261	0	0	0	0	0	0	0	0	0	0	0	0	0	0	0	0	0	0
Otu01262	0	0	0	0	0	0	0	0	0	0	0	0	0	4	0	0	2	3
Otu01263	0	0	1	0	0	0	0	2	1	0	5	0	1	0	0	0	0	0
Otu01264	0	0	0	0	0	0	0	0	0	0	0	0	0	0	0	10	0	0
Otu01265	2	0	0	0	0	0	0	0	0	0	0	0	0	0	0	0	1	3
Otu01266	0	0	0	0	0	5	0	0	0	0	0	0	0	0	0	0	0	3
Otu01267	0	2	0	0	0	1	0	0	0	0	0	2	0	0	1	0	0	0
Otu01268	0	0	0	0	0	0	0	1	0	0	0	1	0	0	0	0	1	0
Otu01269	0	0	0	0	0	0	0	0	0	0	0	0	0	0	0	0	0	1
Otu01270	0	1	0	5	0	0	0	0	0	0	0	0	2	0	0	0	0	2
Otu01271	0	0	0	0	0	0	0	0	0	0	9	0	0	0	0	0	0	0
Otu01272	0	0	0	1	0	0	0	0	0	0	0	0	0	0	0	0	0	0
Otu01273	0	0	0	0	0	0	0	0	0	0	0	0	0	2	3	0	1	0
Otu01274	0	0	0	6	0	0	0	0	3	0	0	0	0	0	0	0	0	0
Otu01275	0	3	0	0	0	0	0	0	0	0	1	0	0	3	0	0	0	1
Otu01276	0	0	0	0	0	0	0	0	0	0	0	0	0	0	0	0	0	1
Otu01277	0	0	0	0	0	0	0	0	0	0	0	0	0	0	0	0	0	0
Otu01278	0	0	1	0	0	1	0	0	1	0	0	4	0	0	0	0	0	0
Otu01279	0	0	0	0	0	0	0	0	0	0	0	0	0	0	0	0	0	0
Otu01280	0	0	0	0	0	0	0	0	0	0	0	0	0	0	0	0	0	0
Otu01281	0	0	0	1	0	0	0	1	0	0	0	0	0	0	0	2	0	0
Otu01282	1	0	0	0	0	0	0	0	2	0	0	0	0	0	0	0	0	0
Otu01283	0	0	0	0	0	0	0	0	0	0	0	0	0	0	0	0	0	0
Otu01284	0	0	2	4	0	0	0	0	0	0	3	0	0	0	0	0	0	0
Otu01285	0	0	0	0	0	0	0	0	0	0	0	0	0	0	0	0	0	0
Otu01286	0	0	0	0	0	0	0	0	0	0	0	0	0	0	0	0	0	0
Otu01287	0	0	0	1	0	2	0	0	0	1	0	0	1	0	0	0	0	0
Otu01288	0	0	0	0	0	0	0	0	0	0	8	0	0	0	0	0	0	0
Otu01289	0	0	0	0	0	0	0	1	0	0	0	0	0	0	0	0	0	0
Otu01290	1	2	1	0	0	0	0	0	0	0	0	1	0	0	1	0	0	0
Otu01291	0	0	0	0	0	0	0	0	0	0	0	0	0	0	0	0	0	0
Otu01292	0	0	0	1	0	0	0	1	0	0	0	1	0	0	0	1	0	0
Otu01293	0	0	0	0	0	0	0	0	0	0	0	0	0	0	0	0	0	0
Otu01294	0	0	0	0	0	0	0	0	0	0	0	0	0	0	0	0	0	3
Otu01295	0	1	1	0	0	0	0	0	0	0	0	5	0	0	0	0	0	1
Otu01296	0	0	0	0	1	0	0	0	1	0	0	0	0	0	0	0	1	0
Otu01297	0	0	4	0	0	0	0	0	0	0	0	0	0	0	0	0	1	0
Otu01298	0	0	0	0	0	1	0	1	1	0	0	0	0	0	0	0	0	0
Otu01299	0	0	0	0	0	0	0	0	0	0	0	0	0	0	3	0	1	0
Otu01300	0	0	0	0	0	0	0	0	0	0	0	0	0	0	0	0	0	0
Otu01301	0	0	0	0	0	0	0	0	0	0	0	0	0	0	0	0	0	0
Otu01302	0	0	0	2	0	1	1	0	2	1	0	0	0	0	0	0	1	0
Otu01303	0	0	0	3	0	0	0	0	0	0	0	0	0	0	0	1	0	0
Otu01304	0	0	0	0	0	0	0	0	0	0	0	0	0	0	0	0	0	0
Otu01305	0	0	0	0	0	0	0	0	0	0	0	0	0	0	0	0	1	0
Otu01306	1	0	0	2	0	0	0	0	0	0	0	0	0	0	0	1	0	0
Otu01307	0	0	0	0	0	0	0	0	0	0	0	0	0	0	0	0	0	0
Otu01308	0	0	0	0	0	0	0	0	0	0	1	0	1	1	0	0	0	0
Otu01309	0	0	0	0	0	0	0	0	0	0	0	0	0	0	0	0	0	0
Otu01310	0	0	0	4	0	0	0	0	0	0	0	0	0	0	0	0	0	0
Otu01311	0	3	0	0	0	0	0	0	0	0	1	0	0	0	0	1	0	0
Otu01312	0	0	2	0	0	1	0	0	0	0	0	0	0	0	0	0	0	0
Otu01313	0	0	0	0	0	0	0	0	0	0	0	0	0	0	0	0	0	0
Otu01314	0	0	0	0	2	0	0	0	0	0	0	0	0	0	0	0	0	0
Otu01315	0	0	0	0	0	0	0	0	0	0	0	0	0	0	0	0	0	0
Otu01316	0	0	0	0	0	0	1	0	0	0	0	0	0	0	0	0	0	0
Otu01317	0	3	0	0	0	1	0	0	0	0	0	0	0	0	0	0	3	0
Otu01318	0	0	0	0	0	0	0	0	0	0	0	0	0	0	0	0	0	0
Otu01319	0	0	0	0	0	0	0	0	0	0	0	9	0	0	0	0	0	0
Otu01320	0	0	0	0	0	0	0	1	0	3	0	0	0	0	0	0	0	0
Otu01321	0	0	0	0	0	0	0	0	0	0	0	0	0	0	0	0	0	0
Otu01322	0	0	0	0	0	0	0	0	0	0	0	0	0	0	0	0	0	2
Otu01323	0	0	2	0	2	0	0	0	0	0	0	0	0	0	3	0	0	0
Otu01324	1	0	0	0	0	0	0	0	1	0	0	0	0	0	0	0	0	0
Otu01325	0	0	0	0	0	0	1	0	2	0	1	0	0	0	0	0	1	1
Otu01326	0	0	0	0	0	0	0	0	0	0	0	0	0	0	0	0	0	0
Otu01327	0	0	0	0	0	0	0	0	0	0	0	0	0	0	0	0	0	0
Otu01328	0	0	0	0	0	0	0	0	0	0	0	0	0	0	0	0	0	0
Otu01329	0	0	0	0	0	0	0	0	0	0	0	0	0	0	0	0	0	0
Otu01330	0	0	0	0	0	0	0	0	0	0	0	0	0	0	0	0	0	0
Otu01331	0	0	0	0	0	0	0	0	0	0	0	0	0	0	2	0	0	0
Otu01332	0	0	0	0	0	0	0	0	0	0	0	0	0	0	0	0	0	0
Otu01333	0	0	0	0	0	0	1	0	0	0	0	0	0	0	1	0	0	0
Otu01334	0	0	0	0	0	0	1	0	0	0	0	1	0	1	1	0	0	0
Otu01335	0	0	0	0	0	0	0	0	0	0	0	0	0	0	0	0	0	2
Otu01336	0	0	0	0	0	1	2	0	0	0	1	0	0	0	0	0	1	0
Otu01337	0	7	0	0	0	0	0	0	0	0	2	0	0	0	0	0	0	0
Otu01338	0	0	0	0	0	0	0	0	0	0	0	0	0	0	0	0	0	0
Otu01339	0	0	0	0	0	0	0	0	0	0	0	0	0	0	0	0	0	0
Otu01340	0	0	0	0	0	0	0	0	0	0	0	0	0	0	9	0	0	0
Otu01341	0	0	0	0	0	1	0	0	0	0	0	0	0	1	0	0	0	1
Otu01342	0	0	2	0	2	0	0	0	0	0	0	3	0	0	0	0	0	0
Otu01343	0	0	0	0	0	1	0	0	0	3	0	1	0	0	0	0	0	0
Otu01344	0	0	0	0	0	0	0	0	0	0	0	0	0	0	0	0	0	0
Otu01345	0	0	1	0	0	0	0	0	0	0	0	0	0	0	0	0	0	0
Otu01346	0	0	0	0	0	0	0	0	0	0	0	0	0	2	0	0	0	0
Otu01347	0	0	0	0	0	4	0	0	0	0	1	0	0	4	0	0	0	0
Otu01348	0	0	0	0	0	0	0	0	0	0	0	0	0	0	1	0	0	0
Otu01349	0	0	0	0	0	0	0	0	0	0	0	0	0	0	0	1	0	0
Otu01350	0	0	0	0	0	0	0	0	0	0	4	0	0	3	0	0	0	0
Otu01351	0	0	0	0	0	0	1	0	1	1	0	0	0	0	0	0	0	0
Otu01352	0	1	0	0	0	0	0	0	0	0	1	0	0	1	0	0	0	0
Otu01353	0	0	0	0	0	0	4	0	0	0	0	0	0	0	0	0	0	0
Otu01354	0	0	1	1	0	0	0	0	0	1	0	0	0	0	0	0	1	1
Otu01355	0	0	0	0	1	0	0	0	0	0	0	0	0	0	0	0	0	0
Otu01356	0	0	0	0	0	0	0	0	0	0	0	0	0	1	0	0	0	1
Otu01357	0	0	0	0	0	0	1	0	0	0	0	0	0	0	0	0	0	2
Otu01358	0	0	0	0	0	0	0	0	0	0	0	2	0	0	0	0	0	5
Otu01359	0	0	1	0	0	0	0	0	0	0	0	0	0	0	0	0	0	0
Otu01360	0	0	0	0	0	0	0	0	0	0	0	0	0	9	0	0	0	0
Otu01361	0	0	0	0	0	0	0	0	0	0	0	0	0	0	0	0	0	0
Otu01362	0	0	0	0	0	0	0	0	0	0	0	0	0	0	0	0	1	0
Otu01363	0	4	2	0	0	0	0	0	0	0	0	0	0	3	0	0	0	0
Otu01364	0	0	0	0	0	0	0	0	0	0	0	0	0	0	0	0	0	0
Otu01365	0	1	0	0	0	0	0	0	0	0	0	0	0	0	0	0	0	0
Otu01366	1	0	0	0	0	0	0	0	0	0	0	0	0	0	0	0	1	0
Otu01367	1	0	0	0	0	0	1	0	3	0	0	1	0	0	0	0	1	0
Otu01368	0	0	0	0	0	0	0	0	0	0	0	0	0	0	0	0	0	0
Otu01369	0	0	0	0	0	0	0	0	0	0	0	0	0	0	0	0	0	0
Otu01370	0	0	0	0	3	0	0	0	0	0	0	1	0	0	0	0	0	0
Otu01371	0	5	0	0	0	3	0	0	0	0	0	0	0	0	0	0	0	0
Otu01372	1	0	1	0	0	1	1	0	0	0	0	0	0	0	0	0	0	0
Otu01373	0	0	0	0	0	0	0	0	0	0	0	0	0	0	0	0	0	0
Otu01374	0	0	0	0	0	0	0	0	0	0	0	0	0	0	0	0	0	0
Otu01375	0	0	0	0	0	0	0	0	0	3	3	0	0	0	0	1	0	0
Otu01376	0	0	2	0	0	0	0	0	0	0	0	0	0	0	0	0	0	0
Otu01377	0	0	4	0	1	0	0	0	0	0	0	0	0	0	0	0	0	0
Otu01378	0	0	0	0	0	0	0	0	0	0	0	0	0	0	0	0	0	0
Otu01379	0	0	0	0	0	0	0	0	0	0	0	0	0	0	0	0	0	0
Otu01380	0	0	0	0	0	0	0	0	0	0	0	0	0	0	0	0	0	0
Otu01381	0	0	0	0	0	0	0	0	0	0	0	0	0	0	0	0	0	0
Otu01382	0	0	0	0	0	1	3	0	0	0	0	0	0	0	0	0	0	1
Otu01383	0	0	2	0	0	1	0	0	0	0	0	1	0	0	1	0	0	1
Otu01384	0	0	0	0	0	0	1	0	0	0	0	0	0	0	0	0	0	0
Otu01385	0	0	0	0	0	3	0	0	0	0	0	0	0	0	0	0	0	0
Otu01386	0	0	0	0	0	0	0	0	0	0	0	1	0	0	0	0	0	0
Otu01387	0	0	0	0	0	0	2	0	0	0	0	0	0	0	0	0	0	0
Otu01388	0	0	0	0	0	0	0	0	0	0	0	0	0	0	0	0	0	0
Otu01389	0	0	0	0	0	0	0	0	0	0	0	0	0	0	0	0	0	0
Otu01390	0	0	0	0	0	0	0	0	1	0	3	1	0	0	0	0	0	3
Otu01391	0	0	0	1	0	0	0	0	0	0	1	0	0	1	0	0	2	1
Otu01392	0	0	0	0	0	0	0	0	1	1	0	0	0	0	1	0	1	0
Otu01393	0	0	0	0	0	0	0	0	0	0	0	0	0	0	0	0	0	0
Otu01394	0	0	1	0	0	1	0	0	0	0	0	0	0	0	0	0	0	1
Otu01395	0	0	0	0	0	0	0	0	0	0	0	0	0	0	0	0	0	0
Otu01396	0	0	0	0	0	0	0	0	0	0	0	0	0	0	0	0	0	0
Otu01397	0	0	0	0	0	0	0	0	0	0	0	0	0	0	0	0	0	0
Otu01398	1	0	0	0	0	0	0	0	0	0	0	0	0	0	0	0	0	0
Otu01399	0	0	0	0	0	0	0	0	0	0	0	0	0	0	0	0	0	0
Otu01400	0	0	0	0	0	0	0	0	0	0	0	0	0	0	0	0	0	0
Otu01401	0	0	1	1	0	0	0	0	1	0	0	0	0	0	0	0	0	0
Otu01402	0	0	0	1	1	0	0	0	0	2	0	0	0	0	2	0	0	1
Otu01403	0	0	0	0	0	0	0	0	0	0	0	0	0	0	0	0	0	0
Otu01404	0	0	0	0	0	0	0	0	0	0	0	0	0	0	0	0	0	0
Otu01405	0	0	0	0	0	0	0	0	0	0	0	0	0	1	0	0	0	0
Otu01406	0	0	0	0	0	0	0	0	0	0	0	0	0	0	0	0	0	0
Otu01407	0	0	0	0	0	0	0	0	0	0	0	0	0	0	0	0	0	0
Otu01408	0	0	0	0	0	0	0	0	0	0	0	0	0	0	0	0	0	0
Otu01409	0	0	0	0	0	0	0	8	0	0	0	0	0	0	0	0	0	0
Otu01410	0	0	0	0	0	0	0	0	0	0	0	0	0	0	0	0	0	0
Otu01411	0	0	0	0	0	0	0	0	0	0	0	0	0	0	0	0	0	0
Otu01412	1	0	1	0	0	0	1	0	0	0	0	0	0	0	0	0	2	0
Otu01413	1	0	0	0	0	0	0	0	0	0	0	1	0	0	0	0	0	0
Otu01414	0	0	1	0	0	0	0	0	0	0	0	0	0	0	0	0	0	0
Otu01415	0	0	0	0	0	0	0	0	0	0	0	0	3	0	0	0	0	0
Otu01416	0	0	0	0	0	0	0	0	0	0	0	0	0	0	8	0	0	0
Otu01417	0	0	0	0	0	0	0	0	0	0	2	0	0	0	0	0	0	0
Otu01418	0	0	0	0	0	0	0	0	0	0	0	0	0	0	0	0	0	0
Otu01419	0	0	0	0	2	0	0	0	0	1	0	3	0	0	2	0	0	0
Otu01420	0	0	2	1	0	0	1	0	0	1	1	0	0	0	1	0	0	0
Otu01421	0	0	0	0	1	0	0	0	0	0	0	1	0	0	0	0	0	0
Otu01422	0	0	0	1	0	0	0	0	0	0	0	0	0	0	0	1	0	0
Otu01423	0	1	0	3	0	0	0	1	1	0	0	0	0	0	0	0	0	0
Otu01424	0	3	0	0	0	0	0	0	0	0	0	0	0	0	0	0	0	0
Otu01425	0	0	0	0	0	0	0	0	0	0	0	0	0	0	0	0	0	0
Otu01426	0	0	1	0	1	0	2	0	0	0	0	1	0	0	0	0	0	0
Otu01427	0	0	0	1	0	0	0	2	0	0	0	0	0	0	0	1	0	0
Otu01428	0	0	1	0	3	0	0	0	0	0	0	0	0	0	0	0	0	0
Otu01429	0	0	0	0	0	0	0	0	0	0	0	0	0	0	0	0	0	0
Otu01430	0	0	0	0	0	0	0	0	0	0	0	0	0	0	0	0	0	0
Otu01431	0	0	1	0	0	0	0	0	1	2	0	1	0	0	0	0	0	0
Otu01432	0	0	0	1	0	0	0	0	0	0	0	0	1	0	0	0	0	0
Otu01433	0	0	0	0	0	0	0	0	0	0	0	0	0	1	0	1	0	4
Otu01434	0	0	0	2	0	0	0	2	0	0	0	0	0	1	0	0	0	0
Otu01435	1	0	0	0	0	0	0	0	0	0	0	0	0	0	0	0	0	2
Otu01436	0	0	1	0	0	1	0	0	0	0	0	0	1	0	1	0	1	0
Otu01437	0	0	0	0	0	0	0	0	0	0	0	0	0	0	0	0	0	0
Otu01438	0	0	0	0	0	0	0	0	0	0	0	0	0	0	0	0	0	0
Otu01439	0	0	0	0	0	0	0	0	0	0	5	0	0	0	0	0	0	0
Otu01440	0	0	0	0	0	0	0	0	0	0	0	0	0	0	0	0	0	0
Otu01441	0	0	0	0	0	0	0	0	0	0	0	0	0	1	0	2	0	0
Otu01442	0	0	0	0	1	1	0	0	0	0	1	0	0	0	1	0	0	0
Otu01443	0	0	0	0	0	2	0	0	0	0	1	0	0	0	0	0	0	0
Otu01444	0	0	0	0	0	0	0	0	0	0	0	0	0	0	0	1	0	0
Otu01445	0	0	0	0	0	0	0	0	0	0	0	0	0	0	0	5	0	0
Otu01446	1	0	0	0	1	0	0	0	1	0	0	1	0	0	0	0	0	0
Otu01447	0	0	0	0	0	0	0	0	0	0	0	0	1	0	0	0	0	0
Otu01448	1	0	0	0	0	0	2	0	0	0	0	0	0	0	0	0	0	0
Otu01449	0	0	0	0	0	0	0	0	0	0	0	0	0	0	0	1	2	0
Otu01450	1	0	0	1	0	0	0	0	0	2	0	0	0	0	0	0	0	0
Otu01451	0	0	0	0	0	0	0	0	0	0	0	0	0	0	0	0	0	0
Otu01452	0	0	0	0	0	1	0	0	0	0	0	0	0	0	0	0	0	3
Otu01453	3	0	0	0	0	0	0	0	5	0	0	0	0	0	0	0	0	0
Otu01454	0	0	0	0	0	0	0	0	0	0	0	0	0	0	0	0	0	0
Otu01455	0	0	0	0	0	0	0	0	0	0	0	0	0	0	0	0	0	0
Otu01456	2	0	0	0	0	0	0	0	0	0	0	0	0	0	0	0	0	0
Otu01457	1	0	0	0	0	0	0	0	1	0	0	2	0	0	0	0	0	0
Otu01458	2	0	0	0	0	0	1	0	0	1	0	0	0	0	0	0	0	0
Otu01459	0	0	0	1	0	1	0	1	0	0	0	0	0	0	0	0	0	0
Otu01460	0	0	0	0	0	0	1	0	0	0	1	0	0	0	0	0	0	0
Otu01461	0	0	0	0	0	0	0	0	0	0	0	0	0	0	0	4	0	0
Otu01462	0	0	0	0	0	0	0	0	0	0	8	0	0	0	0	0	0	0
Otu01463	0	0	0	0	0	0	0	0	0	0	0	0	0	0	0	0	0	0
Otu01464	0	1	0	0	0	0	0	0	0	0	0	0	0	3	0	0	0	0
Otu01465	0	0	0	3	0	0	0	0	0	0	0	0	0	0	0	0	0	0
Otu01466	0	0	0	0	0	0	0	0	0	0	0	0	0	0	0	0	0	0
Otu01467	0	0	1	0	0	0	1	0	1	0	1	0	0	0	0	0	0	4
Otu01468	0	0	0	0	0	1	0	0	0	0	2	0	0	1	0	0	0	0
Otu01469	0	0	2	0	1	1	1	0	0	0	0	1	0	0	0	0	0	1
Otu01470	0	7	0	0	0	0	0	0	0	0	1	0	0	0	0	0	0	0
Otu01471	0	0	0	0	0	0	0	0	0	0	0	0	0	0	0	0	0	0
Otu01472	0	0	0	0	0	1	0	0	0	0	0	2	0	0	0	0	4	0
Otu01473	0	0	0	0	0	0	0	0	0	0	0	0	0	0	0	0	0	0
Otu01474	0	0	0	0	0	0	0	0	0	0	0	0	0	0	0	1	0	1
Otu01475	0	0	1	0	0	0	0	0	0	0	0	0	0	1	0	0	1	1
Otu01476	0	0	0	0	0	0	0	0	0	0	1	0	0	0	0	0	0	0
Otu01477	0	0	0	0	0	0	0	0	0	0	0	0	0	0	0	0	0	0
Otu01478	0	0	0	0	0	0	0	0	0	0	0	0	0	0	0	0	0	0
Otu01479	2	0	0	0	0	0	0	0	0	6	0	0	0	0	0	0	0	0
Otu01480	0	0	0	0	0	0	0	0	0	0	1	0	0	0	0	0	0	0
Otu01481	1	0	1	0	0	0	0	0	0	0	0	0	0	0	0	0	0	0
Otu01482	0	0	0	0	0	0	0	0	0	0	0	0	0	0	0	0	0	0
Otu01483	0	0	0	0	0	0	0	0	0	0	5	0	0	1	0	0	0	0
Otu01484	1	0	0	0	0	0	0	0	0	1	0	1	0	0	0	0	0	0
Otu01485	0	0	0	0	0	0	0	0	0	0	0	0	0	2	0	0	0	0
Otu01486	0	0	0	0	0	0	0	0	0	0	0	0	0	0	0	0	0	0
Otu01487	0	0	0	0	0	0	0	0	5	0	0	0	0	0	0	0	0	0
Otu01488	1	0	0	0	2	0	0	0	0	0	0	0	0	0	0	0	0	0
Otu01489	0	0	0	1	0	0	0	0	0	0	0	0	0	0	0	0	0	0
Otu01490	0	0	0	0	0	2	0	0	0	0	0	0	0	0	0	0	0	0
Otu01491	0	0	0	0	0	0	0	0	0	0	0	0	0	0	0	0	0	0
Otu01492	0	0	0	0	0	0	0	0	0	0	0	0	0	0	0	0	0	0
Otu01493	0	0	0	0	0	0	0	0	0	0	0	0	0	0	0	0	0	0
Otu01494	0	0	0	0	0	0	0	0	0	0	0	0	0	0	0	0	0	0
Otu01495	0	0	0	0	0	0	0	0	0	0	0	0	0	0	0	0	0	0
Otu01496	0	0	0	0	0	0	0	0	0	0	1	0	0	2	0	0	0	0
Otu01497	0	0	0	0	0	0	0	0	0	0	0	0	0	0	0	0	0	0
Otu01498	0	0	0	0	0	0	0	0	0	0	0	0	0	0	0	0	0	0
Otu01499	0	0	0	3	0	0	0	1	0	0	0	0	0	0	0	0	3	0
Otu01500	0	0	0	2	0	0	0	0	1	0	0	0	0	0	0	0	0	0
Otu01501	0	0	0	0	0	0	0	0	0	0	0	0	0	0	0	0	0	0
Otu01502	0	0	0	0	0	0	0	0	0	0	0	0	0	0	0	0	0	0
Otu01503	0	0	0	0	0	0	0	0	0	0	0	0	0	0	0	0	0	0
Otu01504	0	0	0	0	0	0	0	0	0	0	3	0	0	0	0	0	0	4
Otu01505	0	0	0	0	0	0	0	0	0	0	0	0	0	0	0	0	0	0
Otu01506	0	0	0	0	0	0	0	0	0	0	0	0	0	0	0	0	4	0
Otu01507	0	0	0	0	0	0	0	0	0	0	0	0	0	0	0	0	0	0
Otu01508	0	0	0	0	0	0	0	0	0	0	0	0	0	0	0	0	0	0
Otu01509	0	0	1	1	1	0	0	0	0	0	2	0	0	0	1	0	0	1
Otu01510	0	0	0	0	0	0	0	0	0	0	0	0	0	0	1	0	0	1
Otu01511	0	0	0	0	0	0	0	0	0	0	0	0	0	0	1	0	1	0
Otu01512	0	0	0	1	0	0	0	0	0	0	2	0	0	0	0	0	0	0
Otu01513	1	0	0	0	0	0	0	0	0	0	0	1	0	0	1	0	0	1
Otu01514	0	0	0	0	0	0	0	0	0	0	0	0	0	0	0	0	0	0
Otu01515	0	0	0	0	0	0	0	0	0	4	0	1	0	2	0	0	0	0
Otu01516	0	0	0	0	0	0	1	0	0	0	0	0	0	0	0	0	0	0
Otu01517	0	0	0	0	0	0	0	0	1	0	5	0	0	0	0	0	0	0
Otu01518	0	0	0	1	0	0	1	0	0	0	0	0	0	0	0	0	0	0
Otu01519	0	0	0	0	0	0	0	0	0	0	0	0	0	3	0	0	0	0
Otu01520	0	0	0	0	0	0	0	0	0	0	0	0	0	0	0	0	0	0
Otu01521	0	0	0	0	0	0	0	0	0	2	0	0	0	0	1	0	0	0
Otu01522	0	0	0	1	0	1	0	0	0	0	1	0	0	0	0	0	0	1
Otu01523	0	0	0	0	0	0	0	7	0	0	0	0	0	0	0	0	0	0
Otu01524	0	0	0	1	0	0	0	1	0	0	0	0	1	0	0	0	0	1
Otu01525	0	0	0	1	0	0	0	0	0	0	1	0	0	0	0	0	0	0
Otu01526	0	0	1	0	0	0	1	0	0	0	0	0	0	0	0	0	0	0
Otu01527	0	0	0	2	0	0	0	0	0	1	0	0	1	0	0	0	0	0
Otu01528	0	0	0	0	0	0	0	0	0	0	0	0	0	0	0	0	1	0
Otu01529	0	0	0	0	0	0	1	0	0	2	0	0	0	0	1	0	0	1
Otu01530	0	0	0	0	0	0	0	1	0	0	0	0	0	0	0	0	1	0
Otu01531	0	0	0	0	0	0	0	0	0	0	0	0	0	0	0	0	0	0
Otu01532	0	0	0	1	0	0	0	0	0	0	0	0	0	0	0	0	1	0
Otu01533	0	0	0	0	0	1	0	0	0	4	0	0	1	1	0	0	0	0
Otu01534	0	0	0	1	0	0	0	0	0	1	0	0	0	0	0	0	0	0
Otu01535	1	0	1	0	0	0	2	0	0	0	0	0	0	0	0	0	0	0
Otu01536	0	0	0	0	0	0	0	0	0	0	0	0	0	0	0	0	1	1
Otu01537	0	0	0	0	0	0	0	0	0	5	0	0	0	0	0	0	0	0
Otu01538	0	0	0	0	0	0	0	0	0	0	0	0	0	0	0	0	0	0
Otu01539	0	0	0	0	0	0	0	0	0	0	0	0	0	0	0	0	0	0
Otu01540	0	0	0	0	0	0	0	0	0	0	0	0	0	0	0	0	0	0
Otu01541	0	0	0	0	0	0	0	0	0	0	0	0	0	0	0	0	0	0
Otu01542	0	0	0	1	0	0	0	0	0	0	3	0	0	2	0	0	0	0
Otu01543	0	1	0	0	0	0	0	0	0	0	1	0	0	2	0	1	0	0
Otu01544	0	0	0	0	0	0	0	0	0	0	2	0	0	0	0	0	0	0
Otu01545	0	0	0	0	0	0	0	0	0	0	0	0	0	0	0	0	0	0
Otu01546	0	0	0	0	0	0	0	0	0	0	0	0	0	0	0	0	0	0
Otu01547	0	0	0	0	0	0	0	1	0	0	0	0	0	0	0	0	0	0
Otu01548	1	0	0	0	0	0	0	0	0	0	0	0	0	0	0	0	1	0
Otu01549	1	0	0	0	0	0	0	0	0	0	0	0	0	0	0	0	0	0
Otu01550	0	0	0	0	0	0	0	0	0	0	0	0	0	0	0	0	0	0
Otu01551	0	0	0	0	0	0	0	0	0	0	0	0	0	0	0	0	0	0
Otu01552	0	0	0	0	0	2	0	0	1	1	1	0	0	0	0	0	1	0
Otu01553	0	0	0	0	0	0	0	0	0	0	0	0	0	0	0	0	0	0
Otu01554	0	0	0	0	0	0	0	0	0	0	0	0	0	0	0	0	0	0
Otu01555	0	2	0	0	0	0	0	0	0	0	0	0	0	0	0	0	0	0
Otu01556	1	0	0	0	0	0	1	0	0	0	0	0	0	0	0	0	0	5
Otu01557	0	0	0	0	0	0	0	0	0	0	0	0	0	0	0	0	0	0
Otu01558	0	0	0	0	0	0	0	0	0	0	0	0	0	0	0	0	0	1
Otu01559	0	0	0	0	0	0	0	0	0	1	1	0	0	0	0	0	0	0
Otu01560	0	0	0	0	0	0	0	0	0	0	0	0	0	0	1	0	0	0
Otu01561	0	0	0	1	0	0	0	0	0	0	0	0	0	1	0	1	0	0
Otu01562	0	0	0	0	0	0	0	0	0	0	0	0	0	0	5	0	0	0
Otu01563	0	0	0	1	1	0	0	0	0	0	0	0	0	0	0	0	1	0
Otu01564	2	0	0	1	0	0	0	0	0	0	0	1	0	0	0	0	0	1
Otu01565	0	0	0	4	0	0	0	0	0	0	0	0	0	0	0	0	1	0
Otu01566	0	0	0	0	0	0	0	0	0	0	0	2	0	0	0	0	0	0
Otu01567	0	0	0	0	0	5	0	0	0	0	0	0	1	0	0	0	0	0
Otu01568	0	0	0	0	1	0	2	0	0	0	0	0	0	0	0	0	0	0
Otu01569	0	0	0	0	0	0	0	0	0	0	0	0	0	0	0	0	1	0
Otu01570	1	0	0	0	0	0	0	0	0	0	0	0	0	0	0	0	0	0
Otu01571	0	0	0	0	0	0	0	0	0	0	0	0	0	0	0	0	0	0
Otu01572	0	0	0	0	0	0	0	0	0	0	0	0	0	0	1	0	0	0
Otu01573	0	0	0	1	0	0	0	0	0	0	1	0	0	0	0	0	0	0
Otu01574	0	0	0	0	0	1	0	0	0	0	0	0	0	0	0	0	0	0
Otu01575	0	0	0	0	0	0	0	0	0	0	0	0	0	0	0	0	0	0
Otu01576	1	0	2	0	0	0	0	0	0	2	0	0	0	0	0	0	0	0
Otu01577	0	0	0	0	0	0	0	3	0	3	1	0	0	0	0	0	0	0
Otu01578	0	2	1	0	0	0	0	0	0	0	0	0	0	0	3	0	0	0
Otu01579	0	0	0	0	0	0	0	0	0	0	0	0	0	1	0	0	0	0
Otu01580	0	0	0	1	0	0	1	0	0	0	0	0	0	0	0	0	2	0
Otu01581	0	0	0	0	0	0	0	0	0	0	0	0	0	0	0	0	0	0
Otu01582	1	0	0	0	1	0	0	0	0	0	0	0	0	0	0	0	0	0
Otu01583	0	0	0	0	0	0	0	0	0	0	0	0	0	0	0	0	0	0
Otu01584	0	0	0	0	0	0	0	0	0	0	0	0	0	0	0	0	0	0
Otu01585	0	0	0	0	0	0	0	0	0	0	0	0	7	0	0	0	0	0
Otu01586	0	0	0	0	0	0	0	0	0	0	0	0	0	0	0	0	0	0
Otu01587	1	0	3	0	0	0	2	0	0	0	0	0	0	0	0	0	0	0
Otu01588	0	0	0	0	0	0	0	0	0	0	7	0	0	0	0	0	0	0
Otu01589	0	0	0	0	0	0	0	0	0	0	0	0	0	0	0	0	0	0
Otu01590	0	0	0	0	0	0	0	0	0	0	0	0	0	0	0	0	0	0
Otu01591	0	0	0	0	0	0	0	1	1	0	0	0	0	0	0	0	1	0
Otu01592	0	0	0	0	0	0	0	0	0	0	0	0	0	0	0	0	0	0
Otu01593	0	0	0	0	1	0	0	0	0	0	0	0	0	0	0	0	0	0
Otu01594	0	0	0	0	0	0	0	0	0	0	0	0	0	0	0	0	0	0
Otu01595	0	0	0	0	0	0	0	0	0	0	0	0	0	0	0	0	0	0
Otu01596	0	0	0	0	0	0	0	0	0	0	0	0	5	1	0	0	0	0
Otu01597	0	0	1	0	0	0	0	0	0	0	0	0	0	0	0	0	0	0
Otu01598	0	0	0	0	0	0	0	0	0	0	0	0	0	0	0	0	0	0
Otu01599	0	0	0	4	0	0	0	0	0	1	0	0	0	0	0	0	0	0
Otu01600	0	0	0	0	0	0	0	0	0	0	0	0	0	0	0	0	0	0
Otu01601	0	0	0	1	0	0	0	0	0	0	0	1	0	0	0	0	0	0
Otu01602	0	0	0	0	0	0	0	0	0	0	0	0	0	0	0	0	0	0
Otu01603	0	4	0	0	0	0	0	0	0	0	3	0	0	0	0	0	0	0
Otu01604	1	0	0	0	0	0	0	0	0	0	0	0	0	0	0	0	0	0
Otu01605	0	0	0	0	0	0	0	0	0	6	0	0	0	0	0	0	0	0
Otu01606	0	0	2	0	0	0	0	0	0	0	0	0	0	0	0	0	0	2
Otu01607	0	0	2	0	0	0	0	0	0	0	0	0	0	0	0	1	0	0
Otu01608	0	0	0	0	0	0	0	0	0	0	0	0	0	0	0	0	0	0
Otu01609	0	0	0	0	0	0	0	0	0	0	0	0	0	0	0	0	0	0
Otu01610	1	0	2	0	1	2	0	0	0	0	0	0	0	0	0	0	0	0
Otu01611	0	0	0	0	0	0	0	0	0	0	0	0	0	0	0	0	0	2
Otu01612	0	0	0	0	0	0	1	0	0	0	0	0	0	5	0	0	0	0
Otu01613	0	0	0	0	0	0	0	2	0	0	0	0	0	0	0	0	0	0
Otu01614	0	0	1	0	0	0	0	0	0	0	0	0	0	0	0	0	0	0
Otu01615	0	0	0	0	0	0	0	0	0	0	0	0	0	0	0	0	0	0
Otu01616	1	1	0	0	1	0	0	0	0	0	0	0	0	0	0	0	0	2
Otu01617	0	0	0	0	0	0	0	0	0	4	0	0	0	0	0	0	0	0
Otu01618	0	0	0	0	0	0	0	0	0	0	0	0	0	0	0	0	0	0
Otu01619	0	0	0	0	0	0	1	0	0	0	0	0	0	0	0	0	0	0
Otu01620	0	0	0	2	0	0	0	0	0	0	0	0	0	4	0	0	0	0
Otu01621	0	0	0	0	0	0	0	0	0	0	0	0	0	0	0	0	0	0
Otu01622	0	0	0	0	1	0	0	0	0	0	0	0	0	0	0	0	3	0
Otu01623	0	0	0	1	0	0	0	0	0	0	0	0	0	0	0	0	0	0
Otu01624	0	0	0	0	0	0	0	0	0	0	2	0	0	0	0	0	0	3
Otu01625	0	0	0	0	0	0	0	1	0	0	0	0	0	0	0	0	0	0
Otu01626	0	0	0	0	0	0	0	0	0	0	1	0	0	0	0	0	0	0
Otu01627	0	6	0	0	0	0	0	0	0	0	0	0	0	0	0	0	0	0
Otu01628	0	0	0	0	0	0	0	2	1	0	0	0	1	0	0	0	0	0
Otu01629	0	0	0	0	0	0	0	0	0	0	0	0	0	0	0	0	0	0
Otu01630	0	0	2	0	0	0	0	0	0	0	0	0	0	0	0	0	0	0
Otu01631	0	0	0	0	0	0	0	0	0	0	0	0	0	0	0	0	0	0
Otu01632	0	0	0	0	0	1	0	0	1	0	0	0	0	0	0	0	0	0
Otu01633	1	0	0	0	0	0	0	0	0	0	0	0	0	0	0	0	0	2
Otu01634	0	0	0	0	0	0	0	0	0	0	0	0	0	0	0	0	0	0
Otu01635	1	0	0	0	0	0	1	0	0	0	0	0	0	0	0	0	1	0
Otu01636	1	0	0	0	0	0	0	0	0	1	0	0	0	0	0	0	1	0
Otu01637	0	0	0	0	0	0	0	0	0	0	0	0	0	0	0	0	0	0
Otu01638	0	0	1	0	0	1	0	0	0	0	0	0	0	0	0	0	0	0
Otu01639	0	0	0	0	0	0	0	0	0	0	0	0	0	0	0	0	0	0
Otu01640	0	0	1	0	0	0	0	0	0	0	0	0	0	0	2	0	0	0
Otu01641	0	0	0	0	0	0	0	0	0	0	0	0	0	0	0	0	0	0
Otu01642	0	0	1	0	0	2	0	0	0	0	0	0	0	0	1	0	0	0
Otu01643	0	0	0	0	0	0	0	0	0	0	0	0	0	0	0	0	0	0
Otu01644	0	0	0	0	0	0	0	0	0	0	6	0	0	0	0	0	0	0
Otu01645	0	0	0	0	0	0	0	0	0	1	0	0	0	0	0	0	0	0
Otu01646	0	0	0	0	0	0	0	0	0	0	0	0	0	0	0	0	0	0
Otu01647	2	0	0	0	0	0	0	0	0	0	0	0	0	0	0	0	0	1
Otu01648	0	0	0	0	0	0	0	0	0	0	0	0	0	0	0	0	0	0
Otu01649	0	0	0	0	0	0	0	0	0	0	0	0	0	0	0	0	0	0
Otu01650	0	0	0	0	0	0	0	1	0	0	0	0	0	0	0	0	0	0
Otu01651	0	0	0	2	0	0	0	0	0	0	0	0	0	0	0	0	0	1
Otu01652	0	0	1	0	0	0	0	1	0	0	0	0	0	0	0	0	0	1
Otu01653	0	0	0	0	0	0	0	0	0	0	0	2	0	0	0	0	0	0
Otu01654	0	0	0	0	0	0	0	1	0	0	0	0	0	0	0	1	0	0
Otu01655	0	0	0	0	0	0	0	0	0	0	0	0	0	0	0	0	0	1
Otu01656	0	0	0	0	0	0	0	0	0	0	0	0	0	0	0	0	0	0
Otu01657	0	0	0	0	0	0	0	0	0	0	0	0	0	0	0	0	0	0
Otu01658	0	0	0	0	0	0	0	0	0	0	1	0	0	0	0	0	0	0
Otu01659	0	0	0	0	0	0	0	0	0	0	0	0	0	0	0	0	0	0
Otu01660	0	0	0	0	0	0	0	0	0	0	0	0	0	0	0	0	0	0
Otu01661	0	0	0	0	0	0	0	0	0	0	0	0	0	0	0	0	0	0
Otu01662	0	0	0	0	0	1	0	0	1	0	0	0	0	0	0	0	0	0
Otu01663	0	0	0	0	0	0	0	0	0	0	0	0	0	0	0	0	0	0
Otu01664	0	0	1	0	0	0	0	0	1	0	0	0	0	0	0	0	0	0
Otu01665	2	0	0	0	0	0	1	0	0	0	0	0	0	0	0	0	0	0
Otu01666	0	0	0	0	0	0	0	0	2	0	2	0	0	0	0	0	0	2
Otu01667	0	0	0	0	0	0	0	1	1	0	0	0	0	0	0	0	0	0
Otu01668	0	0	0	0	0	0	0	0	0	0	0	0	0	0	6	0	0	0
Otu01669	0	0	0	0	0	0	0	0	0	0	0	0	0	0	0	0	0	0
Otu01670	0	0	0	0	0	0	0	0	2	0	0	0	0	0	0	0	0	0
Otu01671	0	0	0	0	0	0	0	0	0	0	0	0	0	0	0	0	0	0
Otu01672	0	1	0	0	0	0	0	0	1	1	0	0	0	0	0	0	0	0
Otu01673	0	0	0	0	0	0	0	0	0	0	0	0	0	0	0	0	0	1
Otu01674	0	0	0	0	0	1	0	0	1	0	0	0	0	0	0	0	0	0
Otu01675	0	0	0	0	0	0	1	0	0	0	0	0	0	0	0	0	0	0
Otu01676	0	0	0	0	0	0	0	0	0	0	0	0	0	0	1	0	0	0
Otu01677	0	0	1	0	0	0	0	0	0	0	0	1	0	0	0	1	0	0
Otu01678	0	0	0	0	0	0	0	0	0	0	0	0	0	0	1	0	0	0
Otu01679	0	0	0	0	0	0	0	0	0	0	0	0	0	0	0	0	0	0
Otu01680	0	0	0	0	0	0	0	0	0	0	6	0	0	0	0	0	0	0
Otu01681	0	0	0	0	0	0	0	0	0	0	1	0	0	0	0	0	0	0
Otu01682	1	0	0	0	0	0	0	0	0	0	0	0	0	1	0	0	0	0
Otu01683	0	0	0	0	0	0	0	0	0	0	0	0	0	0	0	0	0	0
Otu01684	0	0	0	0	0	0	0	0	0	0	0	0	0	0	4	0	0	1
Otu01685	0	0	0	0	0	0	0	1	0	0	0	1	0	0	0	0	0	0
Otu01686	0	0	0	0	0	0	1	0	0	0	0	0	0	0	2	0	1	0
Otu01687	0	0	0	0	0	0	0	0	0	0	0	0	0	1	0	0	1	0
Otu01688	3	0	0	0	0	0	0	0	0	0	0	0	0	0	0	0	0	0
Otu01689	1	0	1	0	0	0	1	0	0	0	0	1	0	0	0	0	0	0
Otu01690	0	1	0	0	0	0	0	0	0	0	0	0	0	0	0	0	0	0
Otu01691	0	0	0	0	0	0	0	0	0	0	0	0	0	0	0	0	0	0
Otu01692	0	0	0	0	0	0	0	0	0	0	0	2	0	0	0	0	0	0
Otu01693	0	0	0	0	0	0	0	0	0	0	0	0	0	0	0	0	0	0
Otu01694	2	0	0	0	1	0	1	0	0	0	0	0	1	0	0	0	0	0
Otu01695	0	1	0	0	0	0	0	1	0	0	0	0	0	0	0	0	0	0
Otu01696	0	0	0	0	0	0	0	0	0	0	0	0	0	0	0	0	0	0
Otu01697	0	0	0	0	0	0	0	0	0	0	0	0	0	0	0	0	0	0
Otu01698	0	0	0	0	3	0	0	0	0	0	0	0	0	0	0	0	0	0
Otu01699	0	0	0	0	0	0	0	0	0	0	0	0	0	0	0	0	0	0
Otu01700	1	0	0	0	0	0	0	0	0	0	0	1	0	0	0	0	0	1
Otu01701	0	0	0	0	1	0	0	0	0	0	0	0	0	0	0	0	0	1
Otu01702	0	0	0	0	0	0	0	1	0	0	0	0	0	0	0	0	0	0
Otu01703	6	0	0	0	0	0	0	0	0	0	0	0	0	0	0	0	0	0
Otu01704	0	0	0	2	0	0	0	0	3	0	1	0	0	0	0	0	0	0
Otu01705	1	0	0	0	0	0	0	1	0	0	0	0	0	0	0	1	0	1
Otu01706	0	0	0	0	0	0	0	0	0	0	0	2	0	0	0	0	0	0
Otu01707	0	0	1	0	0	0	0	0	0	0	0	0	0	1	0	0	0	0
Otu01708	0	0	0	0	0	0	0	0	0	1	0	0	0	0	0	0	0	0
Otu01709	0	0	0	0	0	0	0	0	0	0	0	2	0	0	0	0	0	0
Otu01710	0	0	0	1	0	0	0	2	0	0	0	0	0	0	0	0	1	0
Otu01711	0	0	1	1	1	0	0	0	0	0	0	0	0	0	0	0	0	1
Otu01712	0	0	0	0	0	0	0	0	0	0	0	0	0	0	0	0	0	0
Otu01713	0	0	0	0	0	0	1	0	0	0	0	1	0	0	1	0	0	0
Otu01714	0	0	0	0	0	0	1	0	0	0	0	0	0	0	0	0	0	0
Otu01715	0	0	0	0	0	0	0	0	0	0	0	0	0	0	0	0	0	0
Otu01716	0	0	0	0	0	0	0	0	0	0	0	0	0	0	0	0	0	0
Otu01717	0	0	0	0	0	0	0	0	0	0	0	2	0	0	0	0	0	0
Otu01718	0	3	0	0	0	0	0	0	0	0	0	0	0	1	0	0	0	0
Otu01719	0	0	0	1	0	0	0	0	0	0	0	0	1	0	0	0	1	0
Otu01720	3	0	0	0	0	0	0	0	0	0	0	0	0	0	0	0	0	0
Otu01721	0	0	0	0	0	0	1	0	0	0	0	0	0	0	0	0	0	0
Otu01722	1	0	0	0	0	0	0	0	0	0	0	1	0	0	1	0	0	0
Otu01723	0	0	0	0	0	0	0	0	1	0	0	0	0	0	0	0	2	0
Otu01724	0	0	0	0	0	0	0	0	0	0	0	0	0	0	0	0	0	0
Otu01725	0	0	0	0	0	0	0	0	3	0	0	0	0	1	0	0	0	0
Otu01726	0	0	0	0	0	0	0	0	0	0	0	0	0	0	0	0	0	0
Otu01727	0	0	0	0	0	0	0	0	0	0	0	0	0	0	0	0	2	0
Otu01728	1	0	1	0	0	0	0	0	0	0	0	0	0	0	2	0	1	0
Otu01729	0	0	0	0	0	0	0	0	0	0	0	1	0	0	0	0	0	2
Otu01730	0	0	0	0	0	0	0	6	0	0	0	0	0	0	0	0	0	0
Otu01731	0	0	0	0	0	0	0	0	0	0	0	0	0	0	0	0	0	0
Otu01732	0	0	0	0	0	0	0	0	0	0	0	0	0	0	0	0	0	0
Otu01733	0	0	0	1	0	0	0	0	1	0	1	0	0	0	0	0	0	0
Otu01734	0	1	0	0	1	0	0	0	0	0	0	0	0	0	0	0	0	0
Otu01735	0	0	0	0	0	0	0	0	0	0	0	0	0	0	0	0	0	0
Otu01736	1	0	0	0	0	0	0	0	0	0	0	0	0	0	0	0	0	0
Otu01737	0	0	0	1	0	0	0	0	1	0	1	0	0	0	0	0	0	0
Otu01738	0	0	0	0	0	0	0	0	0	0	0	0	0	0	0	6	0	0
Otu01739	0	0	0	0	0	0	0	0	0	0	0	0	0	0	0	0	0	0
Otu01740	0	0	0	0	0	0	0	0	0	0	0	0	0	0	0	0	0	0
Otu01741	0	0	0	0	0	0	0	0	0	0	1	1	0	0	0	0	0	0
Otu01742	0	0	0	0	0	0	0	0	1	0	0	0	0	0	0	0	0	1
Otu01743	0	0	0	4	0	0	0	0	0	0	0	0	0	0	0	0	0	0
Otu01744	0	0	0	0	0	0	0	0	0	0	0	0	0	0	0	0	0	0
Otu01745	1	0	0	0	0	0	1	0	0	0	0	0	0	0	1	0	0	0
Otu01746	0	1	0	2	0	0	0	0	0	0	0	0	0	0	0	0	0	1
Otu01747	0	0	0	0	0	0	0	0	0	0	0	0	0	0	0	0	0	0
Otu01748	0	0	0	0	0	0	0	0	0	0	0	0	0	3	0	0	0	0
Otu01749	0	0	0	0	0	0	0	0	0	0	0	0	0	0	0	0	0	0
Otu01750	0	0	0	0	0	0	0	0	0	0	0	0	0	0	0	0	0	0
Otu01751	0	0	1	0	0	0	0	0	0	0	0	0	0	0	0	0	0	0
Otu01752	0	0	0	0	0	0	0	1	0	0	0	0	0	0	0	0	0	0
Otu01753	0	0	0	0	0	0	0	0	0	0	0	0	0	0	0	0	0	0
Otu01754	0	0	0	0	0	0	0	0	0	0	0	0	0	0	0	0	0	0
Otu01755	1	0	0	0	0	0	0	0	0	0	0	0	0	0	0	0	0	1
Otu01756	0	0	0	0	0	0	0	0	0	0	6	0	0	0	0	0	0	0
Otu01757	0	0	0	0	0	0	0	0	0	0	0	0	0	0	0	0	0	0
Otu01758	0	0	0	0	0	0	0	0	0	0	0	0	0	0	0	0	0	0
Otu01759	0	0	0	0	0	0	0	0	0	0	0	6	0	0	0	0	0	0
Otu01760	0	0	0	0	0	0	0	0	0	0	0	1	0	0	1	0	2	0
Otu01761	0	0	0	0	0	0	0	0	0	0	0	0	0	1	0	0	0	0
Otu01762	0	0	0	0	0	0	0	0	0	3	0	0	0	0	0	0	0	0
Otu01763	0	0	0	0	0	0	0	5	0	0	0	0	0	0	0	0	0	0
Otu01764	0	0	0	0	0	0	0	0	0	0	6	0	0	0	0	0	0	0
Otu01765	0	0	0	0	0	0	0	0	0	0	0	0	0	0	0	0	0	0
Otu01766	0	0	0	0	0	0	0	0	0	0	0	0	0	0	0	0	0	0
Otu01767	0	0	0	0	0	0	0	0	0	0	0	0	0	0	0	0	0	0
Otu01768	0	0	0	0	0	0	0	0	0	0	0	0	0	0	0	0	0	0
Otu01769	0	0	0	0	0	0	0	0	0	0	0	0	0	0	0	0	0	0
Otu01770	0	2	0	0	0	0	0	3	0	0	0	0	0	0	0	0	0	0
Otu01771	0	0	0	0	0	0	0	0	0	0	0	0	0	0	0	0	0	0
Otu01772	0	0	0	0	0	0	0	0	0	0	0	0	0	0	0	0	0	0
Otu01773	0	0	0	6	0	0	0	0	0	0	0	0	0	0	0	0	0	0
Otu01774	0	0	0	0	0	0	0	0	0	0	0	0	0	0	0	0	0	0
Otu01775	0	0	0	0	0	0	0	0	0	0	0	0	0	0	0	0	0	5
Otu01776	0	0	0	0	0	0	0	0	0	0	0	0	0	0	0	0	0	0
Otu01777	0	0	0	0	0	0	0	1	0	0	0	0	0	0	0	0	0	0
Otu01778	0	0	0	0	0	0	0	0	0	0	0	0	0	0	5	0	0	0
Otu01779	0	0	0	1	1	0	0	0	0	0	0	0	0	0	0	0	0	1
Otu01780	0	0	0	0	0	0	0	0	0	0	0	0	0	0	0	0	0	0
Otu01781	1	0	0	1	0	0	0	0	0	0	0	0	0	0	0	0	0	1
Otu01782	0	0	0	0	0	0	0	0	0	0	0	0	0	0	0	0	0	0
Otu01783	0	0	0	0	0	3	0	0	0	0	1	0	0	0	0	0	0	0
Otu01784	0	0	0	0	0	0	0	0	0	0	0	0	0	0	0	0	0	0
Otu01785	0	0	0	1	1	0	0	0	0	0	0	0	0	0	0	0	0	0
Otu01786	0	0	0	0	0	1	0	0	0	0	0	0	0	1	0	0	0	0
Otu01787	0	0	0	0	0	0	0	0	0	0	0	0	0	0	0	0	0	0
Otu01788	0	0	0	0	0	0	0	0	0	0	0	0	0	0	0	0	0	0
Otu01789	0	0	0	0	0	0	0	0	0	0	5	0	0	0	0	0	1	0
Otu01790	0	0	0	0	0	0	0	0	0	0	0	0	0	0	0	0	0	0
Otu01791	0	0	0	0	0	0	0	0	0	0	0	0	0	0	0	0	0	0
Otu01792	0	0	0	0	0	0	0	0	0	0	0	0	0	0	0	0	0	0
Otu01793	2	0	0	0	0	0	0	0	0	0	0	0	0	0	0	0	0	0
Otu01794	0	0	0	0	0	0	0	1	1	0	0	0	0	0	0	0	1	0
Otu01795	0	0	1	0	1	0	0	0	0	0	0	0	0	0	0	0	0	1
Otu01796	0	0	0	0	0	0	0	0	0	0	0	0	0	0	0	0	0	0
Otu01797	0	0	0	0	0	0	0	0	0	0	0	1	0	0	0	0	0	0
Otu01798	0	0	1	0	0	0	1	0	0	0	0	2	0	0	2	0	0	0
Otu01799	0	0	0	0	0	0	0	6	0	0	0	0	0	0	0	0	0	0
Otu01800	0	0	0	0	0	0	0	0	0	0	2	0	0	0	0	1	0	0
Otu01801	0	4	0	0	0	0	0	0	0	0	0	0	0	0	0	0	2	0
Otu01802	0	0	3	0	0	2	0	0	1	0	0	0	0	0	0	0	0	0
Otu01803	0	0	0	0	0	0	0	0	0	0	0	0	0	0	0	0	0	0
Otu01804	0	0	0	0	0	0	0	0	0	0	0	0	0	0	0	0	0	0
Otu01805	0	0	0	0	0	0	0	0	0	0	0	0	0	0	0	0	0	1
Otu01806	0	0	0	0	0	0	0	0	0	0	0	0	0	0	0	0	0	0
Otu01807	0	0	0	0	0	0	0	0	0	0	6	0	0	0	0	0	0	0
Otu01808	0	0	0	0	0	0	0	0	0	0	0	0	0	0	0	0	0	0
Otu01809	0	0	0	0	0	0	0	0	0	0	0	0	0	0	4	0	0	0
Otu01810	0	0	0	0	0	0	0	0	0	0	0	0	0	0	0	0	0	0
Otu01811	0	0	0	2	0	4	0	0	0	0	0	0	0	0	0	0	0	0
Otu01812	0	0	2	0	1	0	0	0	0	0	0	0	0	0	0	0	0	2
Otu01813	0	0	0	0	0	1	0	0	0	0	0	0	0	0	0	1	0	0
Otu01814	1	0	0	0	2	0	0	0	0	0	0	0	0	0	0	0	0	1
Otu01815	0	0	0	0	0	0	0	0	0	0	1	0	0	0	0	0	0	0
Otu01816	1	0	0	0	0	0	0	0	0	0	0	0	0	0	0	0	0	5
Otu01817	0	0	0	1	0	0	0	0	0	0	1	0	0	0	0	0	0	0
Otu01818	0	0	0	0	0	0	2	0	0	0	0	0	0	0	0	0	0	0
Otu01819	0	0	0	0	0	0	0	0	0	0	6	0	0	0	0	0	0	0
Otu01820	0	0	0	0	0	0	0	0	0	0	0	0	0	0	0	0	0	0
Otu01821	0	0	0	0	0	0	0	0	0	0	0	0	3	0	0	0	0	0
Otu01822	0	0	0	0	0	0	0	0	0	0	0	0	0	0	0	0	0	0
Otu01823	0	0	0	0	0	0	0	0	0	0	0	0	0	0	0	0	0	0
Otu01824	0	0	0	0	0	0	1	0	5	0	0	0	0	0	0	0	0	0
Otu01825	0	0	0	0	0	0	0	0	0	0	6	0	0	0	0	0	0	0
Otu01826	1	0	0	0	0	0	0	0	0	0	0	0	0	0	0	0	3	1
Otu01827	0	0	0	0	0	0	0	0	0	0	0	0	0	0	0	0	0	0
Otu01828	0	0	0	0	0	1	0	0	0	0	0	0	0	0	0	0	0	0
Otu01829	0	0	0	0	0	3	0	0	0	0	1	0	0	0	0	0	0	0
Otu01830	0	0	0	0	0	0	0	0	0	0	0	0	0	0	0	0	0	0
Otu01831	0	0	0	0	0	0	0	0	0	0	0	0	0	0	0	0	0	0
Otu01832	0	0	0	0	0	0	0	0	0	0	0	0	0	0	0	0	0	0
Otu01833	1	2	0	0	0	0	0	0	0	0	0	0	0	0	0	0	0	0
Otu01834	0	0	0	0	0	0	0	0	0	0	0	0	0	0	0	0	0	0
Otu01835	0	0	0	0	0	0	0	0	0	0	0	0	0	4	0	0	0	0
Otu01836	1	0	0	0	0	0	0	0	0	0	0	0	0	0	0	0	0	0
Otu01837	0	0	0	0	0	0	0	0	0	0	0	0	0	0	0	0	0	0
Otu01838	1	0	0	0	0	0	0	0	0	0	0	0	0	0	0	0	0	0
Otu01839	0	0	0	0	0	0	0	0	0	0	5	0	0	0	0	0	0	0
Otu01840	0	0	2	0	0	0	0	0	0	0	0	0	0	0	0	0	0	0
Otu01841	0	0	0	0	0	0	0	0	0	0	0	0	0	2	0	3	0	0
Otu01842	0	0	0	0	0	0	0	0	0	0	0	0	0	0	0	0	0	0
Otu01843	0	0	0	3	0	0	0	0	0	0	0	0	0	0	0	0	0	0
Otu01844	0	0	0	0	0	0	2	0	0	0	0	0	0	0	1	0	1	0
Otu01845	0	0	0	0	0	0	1	0	1	0	0	0	0	0	0	0	0	0
Otu01846	0	0	0	0	0	0	0	0	0	0	0	0	0	0	0	0	0	0
Otu01847	0	0	0	0	0	0	0	0	0	0	0	0	0	0	0	0	0	0
Otu01848	0	0	0	0	0	0	0	0	0	0	0	0	0	0	0	0	0	0
Otu01849	0	0	0	0	0	0	0	0	0	0	5	0	0	0	0	0	0	0
Otu01850	0	0	1	0	0	0	0	0	0	0	0	0	0	3	0	0	0	1
Otu01851	0	0	1	0	0	0	0	0	0	3	0	0	0	0	0	0	0	0
Otu01852	1	0	0	0	0	0	0	0	0	0	0	0	0	4	0	0	0	0
Otu01853	0	0	0	0	0	0	0	0	0	0	0	0	0	0	0	0	0	0
Otu01854	0	1	0	0	0	0	0	0	0	1	0	0	0	0	0	0	0	0
Otu01855	0	0	0	1	0	0	0	0	0	0	0	0	0	1	0	0	0	0
Otu01856	0	0	0	0	0	0	0	0	0	0	0	0	0	0	0	0	0	0
Otu01857	0	0	0	0	0	0	0	0	0	0	0	0	0	0	0	0	0	0
Otu01858	0	0	0	0	0	0	0	0	0	0	0	2	0	0	0	0	0	0
Otu01859	0	0	1	0	0	0	0	0	0	0	0	1	0	1	0	0	0	0
Otu01860	0	0	0	0	0	0	0	0	0	0	0	0	0	0	0	0	0	0
Otu01861	0	0	0	0	0	0	0	0	0	0	0	0	0	0	0	0	0	0
Otu01862	0	0	0	0	0	0	0	0	0	0	0	0	0	0	0	0	0	0
Otu01863	0	1	0	0	0	0	0	0	0	0	0	0	0	0	1	0	0	0
Otu01864	0	0	0	0	0	0	0	0	0	0	0	1	0	0	1	0	0	0
Otu01865	0	0	0	0	0	0	0	0	0	0	0	0	0	0	0	0	0	0
Otu01866	0	0	0	0	0	0	0	0	0	0	0	0	0	0	0	1	0	0
Otu01867	0	0	0	0	0	0	0	0	0	0	0	0	0	0	0	0	0	0
Otu01868	0	0	0	0	0	3	0	0	2	0	0	0	0	0	0	0	0	0
Otu01869	0	0	0	0	0	0	0	0	0	0	0	0	0	0	0	0	0	0
Otu01870	0	0	0	0	0	0	0	0	0	0	0	0	0	0	0	0	0	0
Otu01871	0	0	0	0	0	0	0	0	0	0	0	0	0	0	0	0	0	0
Otu01872	0	0	0	0	0	1	0	0	0	0	0	0	0	0	0	1	0	0
Otu01873	0	0	0	0	0	0	0	0	1	0	0	0	0	0	0	0	1	0
Otu01874	0	0	0	0	1	0	0	0	0	0	0	0	0	0	0	0	0	0
Otu01875	0	0	0	0	0	0	0	2	0	0	0	0	0	0	0	1	0	0
Otu01876	0	0	0	0	0	0	0	0	0	0	0	0	0	0	0	0	0	0
Otu01877	0	0	0	0	0	0	0	0	0	1	0	0	1	0	0	0	0	0
Otu01878	0	0	0	0	0	0	0	0	0	0	0	0	0	0	0	0	0	0
Otu01879	0	0	0	0	0	0	0	0	1	0	0	0	0	0	0	0	1	0
Otu01880	0	0	0	0	0	0	0	0	0	0	0	0	0	0	0	0	0	0
Otu01881	0	0	0	0	0	0	0	0	0	0	0	0	0	0	0	0	1	0
Otu01882	0	0	0	0	0	0	0	0	0	0	0	0	0	0	0	0	0	1
Otu01883	1	0	2	0	0	0	0	0	0	0	0	0	0	0	0	0	0	0
Otu01884	0	0	0	0	0	0	2	0	0	0	0	0	0	0	2	0	0	0
Otu01885	0	0	0	0	0	0	0	0	0	0	0	0	0	0	0	0	0	0
Otu01886	0	0	0	0	1	1	0	0	0	0	0	0	0	0	0	0	0	0
Otu01887	0	0	0	0	0	0	0	0	0	0	0	0	0	0	0	0	0	0
Otu01888	0	0	0	0	0	0	0	0	0	0	0	0	0	0	0	0	0	0
Otu01889	0	0	0	0	0	0	0	0	0	0	0	0	0	0	0	0	0	0
Otu01890	0	0	0	0	0	0	0	0	0	0	0	0	0	0	0	0	0	0
Otu01891	0	0	0	0	0	0	0	0	0	0	1	0	0	0	0	0	1	0
Otu01892	0	0	0	0	0	0	0	0	0	0	0	0	0	0	0	5	0	0
Otu01893	0	0	0	0	3	0	0	0	0	0	0	0	0	0	0	0	0	0
Otu01894	0	0	0	0	0	0	0	0	0	0	0	0	0	0	0	0	0	0
Otu01895	0	0	0	0	0	0	0	0	0	0	0	0	0	0	0	0	0	0
Otu01896	1	0	0	0	0	0	0	0	0	0	0	0	0	0	0	0	0	0
Otu01897	0	0	0	0	1	0	0	0	0	0	0	0	0	0	0	0	0	0
Otu01898	0	0	0	0	0	0	0	0	1	0	0	0	0	0	0	0	0	0
Otu01899	0	0	0	1	0	0	0	0	0	1	0	0	0	0	0	0	1	0
Otu01900	0	0	0	1	0	0	0	0	0	0	0	0	0	0	0	0	0	0
Otu01901	0	0	0	0	1	0	0	0	0	0	0	0	0	0	0	0	0	0
Otu01902	0	0	0	0	0	0	0	0	0	0	0	0	0	0	3	0	0	0
Otu01903	0	0	0	0	0	0	0	0	0	0	0	0	0	0	0	0	0	0
Otu01904	0	0	0	0	0	0	0	0	0	0	0	0	0	0	0	0	0	0
Otu01905	0	0	0	0	0	0	0	0	0	0	0	0	0	0	0	0	0	0
Otu01906	0	0	0	0	0	0	0	0	0	0	0	0	0	0	0	0	0	0
Otu01907	0	0	0	0	0	0	0	0	0	0	0	0	0	0	0	0	0	0
Otu01908	0	0	0	0	0	2	0	0	0	0	0	0	0	0	0	0	0	0
Otu01909	0	0	0	0	0	0	0	0	0	0	0	0	0	0	0	0	0	0
Otu01910	0	0	0	3	1	0	0	0	0	0	0	0	0	0	0	0	0	0
Otu01911	0	0	0	0	0	0	0	0	0	0	0	0	0	0	0	0	0	0
Otu01912	0	0	0	0	2	0	0	0	0	0	0	0	0	0	0	0	0	0
Otu01913	0	0	0	0	0	0	0	0	0	0	0	0	0	0	0	0	0	0
Otu01914	0	0	0	0	0	0	0	0	0	0	0	0	0	0	0	0	0	0
Otu01915	0	0	1	0	0	0	1	0	0	0	0	0	0	0	0	0	0	0
Otu01916	0	0	0	0	0	0	0	0	0	0	0	0	0	0	0	0	0	0
Otu01917	0	0	0	0	3	0	0	2	0	0	0	0	0	0	0	0	0	0
Otu01918	0	0	0	0	0	0	0	0	1	0	0	1	0	0	0	0	0	0
Otu01919	0	0	0	0	0	0	0	0	0	0	0	0	0	0	0	0	0	0
Otu01920	2	0	0	0	0	0	1	0	0	0	0	0	0	0	0	0	0	0
Otu01921	0	0	0	0	0	0	0	0	0	0	0	0	0	0	0	0	0	0
Otu01922	0	0	0	1	0	0	0	0	0	0	0	0	0	0	0	0	0	0
Otu01923	0	0	0	1	0	0	0	0	0	0	0	0	0	2	0	0	0	0
Otu01924	0	0	0	1	0	0	0	0	0	0	0	0	0	0	0	0	0	0
Otu01925	0	0	0	0	0	0	0	0	0	0	0	0	0	0	0	0	0	0
Otu01926	0	0	0	0	0	0	0	0	0	0	0	0	0	0	0	0	0	0
Otu01927	0	0	0	0	0	0	0	0	0	0	0	0	0	0	0	1	0	2
Otu01928	0	0	0	0	0	0	0	0	0	0	5	0	0	0	0	0	0	0
Otu01929	0	0	0	0	3	0	0	0	0	0	0	0	0	0	0	0	0	0
Otu01930	0	0	0	1	0	0	0	1	0	0	0	0	0	0	0	0	1	0
Otu01931	0	0	0	0	0	0	0	0	0	0	0	0	0	0	0	0	0	0
Otu01932	0	0	0	0	0	0	0	0	0	0	0	0	0	0	0	0	0	0
Otu01933	0	0	0	0	1	0	0	0	1	0	0	0	0	0	0	0	1	0
Otu01934	0	0	0	0	0	0	1	2	0	0	0	0	0	0	0	0	0	0
Otu01935	0	0	0	0	0	0	0	0	0	0	0	0	0	0	0	0	0	0
Otu01936	0	0	0	0	0	0	0	0	1	0	0	0	0	0	0	0	0	0
Otu01937	0	0	0	0	0	0	0	0	0	0	0	0	0	0	0	0	0	0
Otu01938	0	0	0	0	0	0	0	0	0	0	5	0	0	0	0	0	0	0
Otu01939	1	0	2	0	0	1	0	0	0	0	0	0	0	0	0	0	0	0
Otu01940	0	0	0	0	0	5	0	0	0	0	0	0	0	0	0	0	0	0
Otu01941	0	0	0	0	0	0	0	0	0	0	0	0	0	0	0	0	0	0
Otu01942	0	0	0	0	0	0	0	0	0	0	0	0	0	0	0	0	0	1
Otu01943	0	0	0	0	0	0	0	0	0	0	0	0	0	0	0	0	0	0
Otu01944	0	0	0	0	0	0	0	0	0	0	0	0	0	0	0	0	0	0
Otu01945	0	0	0	0	0	0	1	0	0	0	0	0	0	0	0	0	0	0
Otu01946	1	0	0	0	0	0	0	0	0	0	0	0	0	0	0	0	0	2
Otu01947	0	0	0	0	0	0	0	0	0	0	0	0	0	0	0	0	3	0
Otu01948	0	0	0	0	0	0	0	0	0	0	0	0	0	0	0	0	0	0
Otu01949	0	0	0	0	0	0	4	0	0	0	0	0	0	1	0	0	0	0
Otu01950	0	0	0	0	0	0	0	0	1	0	0	0	0	0	0	0	0	0
Otu01951	0	0	0	0	0	0	0	0	0	1	0	0	0	0	0	0	0	0
Otu01952	0	0	0	0	0	0	0	0	0	0	0	0	0	0	0	0	0	0
Otu01953	0	0	0	0	0	0	0	0	0	0	0	0	0	0	0	0	0	0
Otu01954	0	0	0	0	0	0	0	0	0	0	0	0	0	5	0	0	0	0
Otu01955	0	0	0	0	0	0	0	0	0	0	0	0	0	0	0	0	0	0
Otu01956	0	0	0	0	0	0	0	0	0	0	0	0	0	0	0	1	2	0
Otu01957	0	0	0	0	0	0	0	0	0	0	0	0	0	0	0	0	0	0
Otu01958	0	0	0	0	0	0	0	0	0	0	0	0	0	0	0	0	0	0
Otu01959	0	0	0	0	0	0	0	0	0	0	0	0	0	0	0	0	0	0
Otu01960	0	0	0	0	0	0	0	0	0	0	0	0	0	0	0	0	0	0
Otu01961	0	0	0	0	0	0	0	0	0	0	0	0	0	0	0	0	0	0
Otu01962	0	0	0	0	0	0	0	0	0	0	0	0	0	0	0	0	0	0
Otu01963	0	0	0	0	0	0	0	0	0	0	0	0	0	0	0	0	0	0
Otu01964	0	0	0	0	0	0	0	0	1	0	0	0	0	0	0	0	1	0
Otu01965	0	0	0	0	0	0	0	0	0	0	0	0	0	0	0	0	0	0
Otu01966	0	0	0	0	0	0	0	0	0	0	0	0	0	0	0	0	0	0
Otu01967	0	0	0	0	0	0	1	0	0	0	0	0	0	0	0	0	0	0
Otu01968	0	0	0	0	0	0	0	0	0	0	0	0	0	0	0	0	0	0
Otu01969	0	0	0	0	0	0	0	0	0	0	1	0	0	0	4	0	0	0
Otu01970	0	0	0	0	0	0	0	0	0	0	0	0	0	0	0	0	0	0
Otu01971	0	0	0	0	0	0	0	0	0	0	0	0	0	0	0	0	0	0
Otu01972	0	0	0	0	0	0	0	0	0	0	0	0	0	0	0	0	0	0
Otu01973	0	0	1	0	0	0	0	1	0	0	0	0	0	0	0	0	0	0
Otu01974	0	0	0	0	1	0	0	0	0	0	0	0	0	0	0	0	0	0
Otu01975	0	0	0	0	1	0	0	0	0	0	0	0	0	0	0	0	0	2
Otu01976	0	0	0	0	0	0	0	0	0	0	0	0	0	5	0	0	0	0
Otu01977	0	0	0	1	0	0	0	0	0	0	0	0	0	1	0	1	0	0
Otu01978	0	0	0	1	1	0	0	0	0	0	0	0	0	0	0	0	0	0
Otu01979	0	0	0	0	0	0	0	0	0	0	0	0	0	0	0	0	0	0
Otu01980	0	1	0	0	0	0	0	1	0	0	1	0	1	0	0	0	0	0
Otu01981	0	0	0	1	0	0	0	0	0	0	0	0	0	0	2	0	1	0
Otu01982	0	0	0	0	0	0	0	0	0	0	0	0	0	0	0	1	0	2
Otu01983	0	0	0	0	0	1	2	0	0	0	0	0	0	0	0	0	0	1
Otu01984	0	0	0	0	0	0	0	0	3	0	0	0	1	0	0	0	0	0
Otu01985	0	0	0	0	0	0	0	0	0	0	5	0	0	0	0	0	0	0
Otu01986	0	0	0	0	0	0	0	0	0	0	0	0	0	0	0	0	0	0
Otu01987	0	0	0	0	0	0	0	0	0	0	0	0	0	0	0	0	0	0
Otu01988	0	0	0	0	0	0	0	0	0	0	0	0	0	0	0	0	0	0
Otu01989	0	0	0	0	1	0	0	0	0	0	0	2	0	0	0	0	0	0
Otu01990	0	0	0	0	0	0	0	0	0	0	0	0	0	0	0	0	0	0
Otu01991	0	0	0	0	0	1	0	0	0	0	0	0	0	0	0	0	0	0
Otu01992	0	0	2	1	0	0	0	0	0	0	0	2	0	0	0	0	0	0
Otu01993	0	0	0	0	0	0	0	0	0	0	0	0	0	0	0	0	0	0
Otu01994	0	0	0	0	0	1	2	1	0	0	0	0	0	0	0	0	0	0
Otu01995	0	0	0	0	0	0	0	0	0	0	0	0	0	0	1	0	0	0
Otu01996	1	0	0	0	0	0	0	0	0	0	0	0	0	0	1	0	0	0
Otu01997	0	0	2	0	0	0	0	0	0	0	0	0	0	0	0	0	0	1
Otu01998	0	0	0	0	0	0	0	0	0	0	0	5	0	0	0	0	0	0
Otu01999	0	0	0	0	0	0	0	0	0	0	0	0	0	0	0	0	0	0
[truncated: 7,687 more rows]

## Sheet: taxonomy
otu_id	domain	phylum	class	order	family	genus
Otu00001	Bacteria	Proteobacteria	Gammaproteobacteria	unclassified	unclassified	unclassified
Otu00002	Bacteria	Proteobacteria	Gammaproteobacteria	Enterobacteriales	Enterobacteriaceae	unclassified
Otu00003	Bacteria	Proteobacteria	Alphaproteobacteria	Rhodobacterales	Rhodobacteraceae	Ruegeria
Otu00004	Bacteria	Proteobacteria	Gammaproteobacteria	Oceanospirillales	Alcanivoracaceae	Alcanivorax
Otu00005	Bacteria	Proteobacteria	Gammaproteobacteria	Oceanospirillales	Oceanospirillaceae	Marinomonas
Otu00006	Bacteria	Proteobacteria	Alphaproteobacteria	Kiloniellales	Kiloniellaceae	unclassified
Otu00007	Bacteria	Bacteroidetes	unclassified	unclassified	unclassified	unclassified
Otu00008	Bacteria	Cyanobacteria	4C0d-2	MLE1-12	unclassified	unclassified
Otu00009	Bacteria	Proteobacteria	Gammaproteobacteria	Vibrionales	Vibrionaceae	Vibrio
Otu00010	Bacteria	Proteobacteria	Gammaproteobacteria	Vibrionales	Vibrionaceae	Vibrio
Otu00011	Bacteria	Proteobacteria	Alphaproteobacteria	Rhizobiales	Phyllobacteriaceae	Ahrensia
Otu00012	Bacteria	Proteobacteria	Gammaproteobacteria	Alteromonadales	Alteromonadaceae	unclassified
Otu00013	Bacteria	Proteobacteria	unclassified	unclassified	unclassified	unclassified
Otu00014	Bacteria	Proteobacteria	Alphaproteobacteria	Kiloniellales	Kiloniellaceae	Thalassospira
Otu00015	Bacteria	Proteobacteria	Alphaproteobacteria	Rhodobacterales	Rhodobacteraceae	Donghicola
Otu00016	Bacteria	Proteobacteria	Gammaproteobacteria	unclassified	unclassified	unclassified
Otu00017	Bacteria	Proteobacteria	Alphaproteobacteria	Rickettsiales	Pelagibacteraceae	unclassified
Otu00018	Bacteria	Proteobacteria	Alphaproteobacteria	Rhodobacterales	Rhodobacteraceae	Ruegeria
Otu00019	Bacteria	Proteobacteria	Gammaproteobacteria	Vibrionales	Vibrionaceae	Vibrio
Otu00020	Bacteria	Bacteroidetes	Flavobacteriia	Flavobacteriales	Flavobacteriaceae	unclassified
Otu00021	Bacteria	Proteobacteria	unclassified	unclassified	unclassified	unclassified
Otu00022	Bacteria	Proteobacteria	Deltaproteobacteria	Desulfobacterales	Nitrospinaceae	Nitrospina
Otu00023	Bacteria	Proteobacteria	Alphaproteobacteria	Rhodobacterales	Rhodobacteraceae	unclassified
Otu00024	Bacteria	Proteobacteria	Alphaproteobacteria	Rhodobacterales	Rhodobacteraceae	Roseovarius
Otu00025	Bacteria	Proteobacteria	Alphaproteobacteria	unclassified	unclassified	unclassified
Otu00026	Bacteria	Proteobacteria	Gammaproteobacteria	Alteromonadales	OM60	unclassified
Otu00027	Bacteria	Proteobacteria	Alphaproteobacteria	Rhodobacterales	Rhodobacteraceae	Paracoccus
Otu00028	Bacteria	Proteobacteria	Alphaproteobacteria	Rhodobacterales	Rhodobacteraceae	unclassified
Otu00029	Bacteria	Proteobacteria	Gammaproteobacteria	Vibrionales	Pseudoalteromonadaceae	Pseudoalteromonas
Otu00030	Bacteria	Proteobacteria	Gammaproteobacteria	Alteromonadales	Alteromonadaceae	Marinobacter
Otu00031	Bacteria	Proteobacteria	Gammaproteobacteria	Oceanospirillales	Oceanospirillaceae	Oceaniserpentilla
Otu00032	Bacteria	Proteobacteria	Gammaproteobacteria	unclassified	unclassified	unclassified
Otu00033	Bacteria	Proteobacteria	unclassified	unclassified	unclassified	unclassified
Otu00034	Bacteria	Proteobacteria	Gammaproteobacteria	Oceanospirillales	Oleiphilaceae	unclassified
Otu00035	Bacteria	Proteobacteria	Gammaproteobacteria	Alteromonadales	Alteromonadaceae	Alteromonas
Otu00036	Bacteria	Proteobacteria	Alphaproteobacteria	unclassified	unclassified	unclassified
Otu00037	Bacteria	Proteobacteria	Gammaproteobacteria	Alteromonadales	Alteromonadaceae	Glaciecola
Otu00038	Bacteria	Proteobacteria	Alphaproteobacteria	Rhizobiales	unclassified	unclassified
Otu00039	Bacteria	Proteobacteria	Alphaproteobacteria	Rhodobacterales	Rhodobacteraceae	Phaeobacter
Otu00040	Bacteria	Bacteroidetes	Cytophagia	Cytophagales	Flammeovirgaceae	Roseivirga
Otu00041	Bacteria	Bacteroidetes	Flavobacteriia	Flavobacteriales	Flavobacteriaceae	unclassified
Otu00042	Bacteria	Bacteroidetes	Flavobacteriia	Flavobacteriales	Flavobacteriaceae	unclassified
Otu00043	Bacteria	Proteobacteria	Gammaproteobacteria	Alteromonadales	Alteromonadaceae	Glaciecola
Otu00044	Bacteria	Bacteroidetes	Flavobacteriia	Flavobacteriales	Flavobacteriaceae	unclassified
Otu00045	Bacteria	Proteobacteria	Alphaproteobacteria	Rhodobacterales	Rhodobacteraceae	unclassified
Otu00046	Bacteria	Proteobacteria	Alphaproteobacteria	unclassified	unclassified	unclassified
Otu00047	Bacteria	Proteobacteria	Alphaproteobacteria	Rhodobacterales	Rhodobacteraceae	unclassified
Otu00048	Bacteria	Proteobacteria	Gammaproteobacteria	Alteromonadales	Alteromonadaceae	Alteromonas
Otu00049	Bacteria	GN02	BD1-5	unclassified	unclassified	unclassified
Otu00050	Bacteria	Proteobacteria	Deltaproteobacteria	unclassified	unclassified	unclassified
Otu00051	Bacteria	Proteobacteria	Alphaproteobacteria	Sphingomonadales	unclassified	unclassified
Otu00052	Bacteria	Proteobacteria	Alphaproteobacteria	unclassified	unclassified	unclassified
Otu00053	Bacteria	Proteobacteria	Deltaproteobacteria	NB1-j	JTB38	unclassified
Otu00054	Bacteria	Proteobacteria	Gammaproteobacteria	unclassified	unclassified	unclassified
Otu00055	Bacteria	Proteobacteria	Alphaproteobacteria	Rhodobacterales	Rhodobacteraceae	Paracoccus
Otu00056	Bacteria	Proteobacteria	Gammaproteobacteria	unclassified	unclassified	unclassified
Otu00057	Bacteria	Planctomycetes	Phycisphaerae	Phycisphaerales	Phycisphaeraceae	unclassified
Otu00058	Bacteria	Proteobacteria	Alphaproteobacteria	unclassified	unclassified	unclassified
Otu00059	Bacteria	Proteobacteria	Alphaproteobacteria	unclassified	unclassified	unclassified
Otu00060	Bacteria	Proteobacteria	unclassified	unclassified	unclassified	unclassified
Otu00061	Bacteria	Proteobacteria	Alphaproteobacteria	Rhodobacterales	Hyphomonadaceae	unclassified
Otu00062	Bacteria	Proteobacteria	Alphaproteobacteria	Rhodobacterales	Rhodobacteraceae	unclassified
Otu00063	Bacteria	Proteobacteria	Alphaproteobacteria	unclassified	unclassified	unclassified
Otu00064	Bacteria	Bacteroidetes	Flavobacteriia	Flavobacteriales	Flavobacteriaceae	unclassified
Otu00065	Bacteria	Proteobacteria	Betaproteobacteria	Nitrosomonadales	Nitrosomonadaceae	unclassified
Otu00066	Bacteria	Bacteroidetes	Cytophagia	Cytophagales	Flammeovirgaceae	unclassified
Otu00067	Bacteria	Proteobacteria	unclassified	unclassified	unclassified	unclassified
Otu00068	Bacteria	Proteobacteria	Alphaproteobacteria	Kiloniellales	Kiloniellaceae	unclassified
Otu00069	Bacteria	Proteobacteria	unclassified	unclassified	unclassified	unclassified
Otu00070	Bacteria	Bacteroidetes	Flavobacteriia	Flavobacteriales	Flavobacteriaceae	Winogradskyella
Otu00071	Bacteria	Proteobacteria	Alphaproteobacteria	Rhizobiales	unclassified	unclassified
Otu00072	Bacteria	Proteobacteria	Alphaproteobacteria	unclassified	unclassified	unclassified
Otu00073	Bacteria	Bacteroidetes	Flavobacteriia	Flavobacteriales	Flavobacteriaceae	unclassified
Otu00074	Bacteria	Verrucomicrobia	Verrucomicrobiae	Verrucomicrobiales	Verrucomicrobiaceae	Persicirhabdus
Otu00075	Bacteria	Cyanobacteria	4C0d-2	SM2F09	unclassified	unclassified
Otu00076	Bacteria	Proteobacteria	Gammaproteobacteria	HTCC2188	HTCC2089	unclassified
Otu00077	Bacteria	Proteobacteria	Alphaproteobacteria	Rhodobacterales	Hyphomonadaceae	unclassified
Otu00078	Bacteria	Proteobacteria	Gammaproteobacteria	Thiotrichales	Piscirickettsiaceae	unclassified
Otu00079	Bacteria	Proteobacteria	Alphaproteobacteria	Rhodobacterales	Rhodobacteraceae	unclassified
Otu00080	Bacteria	Proteobacteria	Alphaproteobacteria	unclassified	unclassified	unclassified
Otu00081	Bacteria	Proteobacteria	Gammaproteobacteria	[Marinicellales]	[Marinicellaceae]	Marinicella
Otu00082	Bacteria	Proteobacteria	Deltaproteobacteria	Bdellovibrionales	Bdellovibrionaceae	Bdellovibrio
Otu00083	Bacteria	Proteobacteria	Gammaproteobacteria	Pseudomonadales	Pseudomonadaceae	Pseudomonas
Otu00084	Bacteria	Proteobacteria	Alphaproteobacteria	unclassified	unclassified	unclassified
Otu00085	Bacteria	Proteobacteria	Betaproteobacteria	Nitrosomonadales	Nitrosomonadaceae	unclassified
Otu00086	Bacteria	Proteobacteria	Alphaproteobacteria	Kiloniellales	Kiloniellaceae	Thalassospira
Otu00087	Bacteria	Proteobacteria	Alphaproteobacteria	Rhodobacterales	Rhodobacteraceae	unclassified
Otu00088	Bacteria	SBR1093	VHS-B5-50	unclassified	unclassified	unclassified
Otu00089	Bacteria	Proteobacteria	Alphaproteobacteria	Rhodobacterales	Rhodobacteraceae	unclassified
Otu00090	Bacteria	Proteobacteria	unclassified	unclassified	unclassified	unclassified
Otu00091	Bacteria	Proteobacteria	Gammaproteobacteria	Oceanospirillales	Oleiphilaceae	unclassified
Otu00092	Bacteria	Proteobacteria	unclassified	unclassified	unclassified	unclassified
Otu00093	Bacteria	Proteobacteria	Deltaproteobacteria	Bdellovibrionales	Bdellovibrionaceae	Bdellovibrio
Otu00094	Bacteria	Proteobacteria	Gammaproteobacteria	unclassified	unclassified	unclassified
Otu00095	Bacteria	Proteobacteria	Gammaproteobacteria	Alteromonadales	Colwelliaceae	Thalassomonas
Otu00096	Bacteria	Bacteroidetes	Flavobacteriia	Flavobacteriales	Flavobacteriaceae	unclassified
Otu00097	Bacteria	Proteobacteria	Gammaproteobacteria	Chromatiales	unclassified	unclassified
Otu00098	Bacteria	Bacteroidetes	Flavobacteriia	Flavobacteriales	Flavobacteriaceae	unclassified
Otu00099	Bacteria	Proteobacteria	Alphaproteobacteria	Rhodobacterales	Hyphomonadaceae	unclassified
Otu00100	Bacteria	Proteobacteria	Gammaproteobacteria	Thiotrichales	Piscirickettsiaceae	Methylophaga
Otu00101	Bacteria	Proteobacteria	Betaproteobacteria	Methylophilales	Methylophilaceae	Methylotenera
Otu00102	Bacteria	Proteobacteria	Deltaproteobacteria	unclassified	unclassified	unclassified
Otu00103	Bacteria	Proteobacteria	Gammaproteobacteria	Thiotrichales	Piscirickettsiaceae	unclassified
Otu00104	Bacteria	Proteobacteria	Alphaproteobacteria	Rhodospirillales	unclassified	unclassified
Otu00105	Bacteria	Bacteroidetes	Cytophagia	Cytophagales	Flammeovirgaceae	unclassified
Otu00106	Bacteria	Proteobacteria	unclassified	unclassified	unclassified	unclassified
Otu00107	Bacteria	Bacteroidetes	Flavobacteriia	Flavobacteriales	Flavobacteriaceae	Olleya
Otu00108	Bacteria	Proteobacteria	Alphaproteobacteria	Rhodobacterales	Rhodobacteraceae	unclassified
Otu00109	Bacteria	Proteobacteria	Alphaproteobacteria	Kiloniellales	unclassified	unclassified
Otu00110	Bacteria	Bacteroidetes	Flavobacteriia	Flavobacteriales	Flavobacteriaceae	unclassified
Otu00111	Bacteria	Bacteroidetes	Flavobacteriia	Flavobacteriales	Flavobacteriaceae	Ulvibacter
Otu00112	Bacteria	Proteobacteria	Alphaproteobacteria	unclassified	unclassified	unclassified
Otu00113	Bacteria	Proteobacteria	Alphaproteobacteria	Rhodobacterales	Rhodobacteraceae	unclassified
Otu00114	Bacteria	Proteobacteria	Alphaproteobacteria	unclassified	unclassified	unclassified
Otu00115	Bacteria	Tenericutes	Mollicutes	unclassified	unclassified	unclassified
Otu00116	Bacteria	Proteobacteria	unclassified	unclassified	unclassified	unclassified
Otu00117	Bacteria	unclassified	unclassified	unclassified	unclassified	unclassified
Otu00118	Bacteria	Proteobacteria	Gammaproteobacteria	Alteromonadales	Alteromonadaceae	Alteromonas
Otu00119	Bacteria	Proteobacteria	Gammaproteobacteria	unclassified	unclassified	unclassified
Otu00120	Bacteria	Proteobacteria	unclassified	unclassified	unclassified	unclassified
Otu00121	Bacteria	Proteobacteria	Alphaproteobacteria	unclassified	unclassified	unclassified
Otu00122	Bacteria	Proteobacteria	Gammaproteobacteria	Legionellales	unclassified	unclassified
Otu00123	Bacteria	Proteobacteria	Alphaproteobacteria	Rickettsiales	Pelagibacteraceae	unclassified
Otu00124	Bacteria	Proteobacteria	Alphaproteobacteria	Rhodospirillales	Rhodospirillaceae	unclassified
Otu00125	Bacteria	Bacteroidetes	Flavobacteriia	Flavobacteriales	Flavobacteriaceae	Maribacter
Otu00126	Bacteria	Proteobacteria	Alphaproteobacteria	Rhizobiales	Phyllobacteriaceae	Ahrensia
Otu00127	Bacteria	Proteobacteria	Gammaproteobacteria	unclassified	unclassified	unclassified
Otu00128	Bacteria	Bacteroidetes	Flavobacteriia	Flavobacteriales	Flavobacteriaceae	unclassified
Otu00129	Bacteria	Actinobacteria	Acidimicrobiia	Acidimicrobiales	C111	unclassified
Otu00130	Bacteria	Proteobacteria	Betaproteobacteria	Nitrosomonadales	Nitrosomonadaceae	unclassified
Otu00131	Bacteria	Proteobacteria	Gammaproteobacteria	Alteromonadales	Shewanellaceae	Shewanella
Otu00132	Bacteria	Proteobacteria	Gammaproteobacteria	Legionellales	Francisellaceae	Francisella
Otu00133	Bacteria	Bacteroidetes	Bacteroidia	Bacteroidales	Bacteroidaceae	Bacteroides
Otu00134	Bacteria	Cyanobacteria	Synechococcophycideae	Synechococcales	Synechococcaceae	Synechococcus
Otu00135	Bacteria	unclassified	unclassified	unclassified	unclassified	unclassified
Otu00136	Bacteria	Proteobacteria	unclassified	unclassified	unclassified	unclassified
Otu00137	Bacteria	Proteobacteria	unclassified	unclassified	unclassified	unclassified
Otu00138	Bacteria	Proteobacteria	unclassified	unclassified	unclassified	unclassified
Otu00139	Bacteria	Firmicutes	Bacilli	Lactobacillales	Streptococcaceae	Lactococcus
Otu00140	Bacteria	Proteobacteria	Alphaproteobacteria	unclassified	unclassified	unclassified
Otu00141	Bacteria	Proteobacteria	Alphaproteobacteria	Rhodobacterales	Rhodobacteraceae	unclassified
Otu00142	Bacteria	Proteobacteria	Gammaproteobacteria	Oceanospirillales	Oleiphilaceae	unclassified
Otu00143	Bacteria	Bacteroidetes	unclassified	unclassified	unclassified	unclassified
Otu00144	Bacteria	Cyanobacteria	Synechococcophycideae	Synechococcales	Synechococcaceae	Synechococcus
Otu00145	Bacteria	Proteobacteria	Gammaproteobacteria	unclassified	unclassified	unclassified
Otu00146	Bacteria	Proteobacteria	Deltaproteobacteria	NB1-j	JTB38	unclassified
Otu00147	Bacteria	Proteobacteria	Deltaproteobacteria	unclassified	unclassified	unclassified
Otu00148	Bacteria	Bacteroidetes	Flavobacteriia	Flavobacteriales	unclassified	unclassified
Otu00149	Bacteria	Proteobacteria	Alphaproteobacteria	Rhodobacterales	Rhodobacteraceae	Octadecabacter
Otu00150	Bacteria	Proteobacteria	Gammaproteobacteria	unclassified	unclassified	unclassified
Otu00151	Bacteria	Cyanobacteria	4C0d-2	MLE1-12	unclassified	unclassified
Otu00152	Bacteria	Verrucomicrobia	Verrucomicrobiae	Verrucomicrobiales	Verrucomicrobiaceae	Verrucomicrobium
Otu00153	Bacteria	Proteobacteria	Alphaproteobacteria	unclassified	unclassified	unclassified
Otu00154	Bacteria	Cyanobacteria	4C0d-2	MLE1-12	unclassified	unclassified
Otu00155	Bacteria	unclassified	unclassified	unclassified	unclassified	unclassified
Otu00156	Bacteria	Proteobacteria	Gammaproteobacteria	Vibrionales	Pseudoalteromonadaceae	Pseudoalteromonas
Otu00157	Bacteria	Proteobacteria	Deltaproteobacteria	unclassified	unclassified	unclassified
Otu00158	Bacteria	Proteobacteria	Deltaproteobacteria	Bdellovibrionales	Bacteriovoracaceae	Bacteriovorax
Otu00159	Bacteria	Bacteroidetes	[Saprospirae]	[Saprospirales]	Saprospiraceae	unclassified
Otu00160	Bacteria	Proteobacteria	Deltaproteobacteria	Bdellovibrionales	Bacteriovoracaceae	Bacteriovorax
Otu00161	Bacteria	Proteobacteria	Gammaproteobacteria	unclassified	unclassified	unclassified
Otu00162	Bacteria	Firmicutes	Bacilli	Lactobacillales	Streptococcaceae	Lactococcus
Otu00163	Bacteria	Proteobacteria	Alphaproteobacteria	Rhodobacterales	Rhodobacteraceae	unclassified
Otu00164	Bacteria	Proteobacteria	Alphaproteobacteria	Sphingomonadales	Erythrobacteraceae	unclassified
Otu00165	Bacteria	Proteobacteria	Gammaproteobacteria	unclassified	unclassified	unclassified
Otu00166	Bacteria	Proteobacteria	Epsilonproteobacteria	Campylobacterales	Campylobacteraceae	Arcobacter
Otu00167	Bacteria	Proteobacteria	Alphaproteobacteria	Rhodobacterales	Rhodobacteraceae	unclassified
Otu00168	Bacteria	Proteobacteria	Gammaproteobacteria	Alteromonadales	Alteromonadaceae	unclassified
Otu00169	Bacteria	Firmicutes	Bacilli	Lactobacillales	Streptococcaceae	Streptococcus
Otu00170	Bacteria	Proteobacteria	Gammaproteobacteria	Pseudomonadales	Moraxellaceae	Enhydrobacter
Otu00171	Bacteria	Proteobacteria	Deltaproteobacteria	Myxococcales	unclassified	unclassified
Otu00172	Bacteria	Proteobacteria	Alphaproteobacteria	Rhizobiales	Hyphomicrobiaceae	Filomicrobium
Otu00173	Bacteria	Tenericutes	Mollicutes	Mycoplasmatales	Mycoplasmataceae	Mycoplasma
Otu00174	Bacteria	Proteobacteria	Gammaproteobacteria	Vibrionales	Pseudoalteromonadaceae	Pseudoalteromonas
Otu00175	Bacteria	Bacteroidetes	Flavobacteriia	Flavobacteriales	unclassified	unclassified
Otu00176	Bacteria	Proteobacteria	Gammaproteobacteria	Vibrionales	Pseudoalteromonadaceae	Pseudoalteromonas
Otu00177	Bacteria	Proteobacteria	Alphaproteobacteria	unclassified	unclassified	unclassified
Otu00178	Bacteria	Proteobacteria	Gammaproteobacteria	Oceanospirillales	unclassified	unclassified
Otu00179	Bacteria	Acidobacteria	Solibacteres	Solibacterales	PAUC26f	unclassified
Otu00180	Bacteria	Bacteroidetes	[Rhodothermi]	[Rhodothermales]	[Balneolaceae]	Balneola
Otu00181	Bacteria	Proteobacteria	unclassified	unclassified	unclassified	unclassified
Otu00182	Bacteria	Proteobacteria	Gammaproteobacteria	Alteromonadales	Alteromonadaceae	ZD0117
Otu00183	Bacteria	Actinobacteria	Acidimicrobiia	Acidimicrobiales	C111	unclassified
Otu00184	Bacteria	Cyanobacteria	Synechococcophycideae	Synechococcales	Synechococcaceae	unclassified
Otu00185	Bacteria	Proteobacteria	Alphaproteobacteria	unclassified	unclassified	unclassified
Otu00186	Bacteria	unclassified	unclassified	unclassified	unclassified	unclassified
Otu00187	Bacteria	Proteobacteria	Alphaproteobacteria	BD7-3	unclassified	unclassified
Otu00188	Bacteria	Proteobacteria	Alphaproteobacteria	Kiloniellales	Kiloniellaceae	Thalassospira
Otu00189	Bacteria	Chlorobi	OPB56	unclassified	unclassified	unclassified
Otu00190	Bacteria	Proteobacteria	Gammaproteobacteria	Xanthomonadales	Sinobacteraceae	unclassified
Otu00191	Bacteria	Proteobacteria	Gammaproteobacteria	Vibrionales	Pseudoalteromonadaceae	Pseudoalteromonas
Otu00192	Bacteria	unclassified	unclassified	unclassified	unclassified	unclassified
Otu00193	Bacteria	Proteobacteria	Gammaproteobacteria	unclassified	unclassified	unclassified
Otu00194	Bacteria	Proteobacteria	Gammaproteobacteria	unclassified	unclassified	unclassified
Otu00195	Bacteria	Proteobacteria	Alphaproteobacteria	Rhizobiales	Cohaesibacteraceae	unclassified
Otu00196	Bacteria	Proteobacteria	Gammaproteobacteria	Oceanospirillales	Alcanivoracaceae	Alcanivorax
Otu00197	Bacteria	Proteobacteria	Gammaproteobacteria	HTCC2188	HTCC2089	unclassified
Otu00198	Bacteria	Proteobacteria	Alphaproteobacteria	unclassified	unclassified	unclassified
Otu00199	Bacteria	Proteobacteria	Deltaproteobacteria	Bdellovibrionales	Bdellovibrionaceae	Bdellovibrio
Otu00200	Bacteria	Proteobacteria	Gammaproteobacteria	unclassified	unclassified	unclassified
Otu00201	Bacteria	Proteobacteria	Deltaproteobacteria	Bdellovibrionales	Bdellovibrionaceae	Bdellovibrio
Otu00202	Bacteria	Proteobacteria	Gammaproteobacteria	unclassified	unclassified	unclassified
Otu00203	Bacteria	Proteobacteria	Gammaproteobacteria	unclassified	unclassified	unclassified
Otu00204	Bacteria	Proteobacteria	Alphaproteobacteria	Kiloniellales	Kiloniellaceae	Thalassospira
Otu00205	Bacteria	Proteobacteria	Gammaproteobacteria	Oceanospirillales	Halomonadaceae	Halomonas
Otu00206	Bacteria	Spirochaetes	Spirochaetes	Spirochaetales	Spirochaetaceae	Spirochaeta
Otu00207	Bacteria	Proteobacteria	Gammaproteobacteria	unclassified	unclassified	unclassified
Otu00208	Bacteria	Proteobacteria	unclassified	unclassified	unclassified	unclassified
Otu00209	Bacteria	Proteobacteria	Alphaproteobacteria	Rhizobiales	unclassified	unclassified
Otu00210	Bacteria	Proteobacteria	Alphaproteobacteria	Rickettsiales	Pelagibacteraceae	unclassified
Otu00211	Bacteria	Proteobacteria	Alphaproteobacteria	Rhodobacterales	Hyphomonadaceae	unclassified
Otu00212	Bacteria	Bacteroidetes	Flavobacteriia	Flavobacteriales	unclassified	unclassified
Otu00213	Bacteria	Proteobacteria	Gammaproteobacteria	Alteromonadales	Alteromonadaceae	Glaciecola
Otu00214	Bacteria	Proteobacteria	Alphaproteobacteria	Rhizobiales	Bradyrhizobiaceae	unclassified
Otu00215	Bacteria	Proteobacteria	Alphaproteobacteria	Sphingomonadales	Sphingomonadaceae	unclassified
Otu00216	Bacteria	Proteobacteria	Gammaproteobacteria	Alteromonadales	Alteromonadaceae	Glaciecola
Otu00217	Bacteria	Proteobacteria	Gammaproteobacteria	Alteromonadales	Alteromonadaceae	Alteromonas
Otu00218	Bacteria	Proteobacteria	Gammaproteobacteria	Thiotrichales	Piscirickettsiaceae	Methylophaga
Otu00219	Bacteria	Bacteroidetes	Cytophagia	Cytophagales	Flammeovirgaceae	unclassified
Otu00220	Bacteria	Proteobacteria	Gammaproteobacteria	HTCC2188	HTCC2089	unclassified
Otu00221	Bacteria	Proteobacteria	Gammaproteobacteria	unclassified	unclassified	unclassified
Otu00222	Bacteria	Proteobacteria	unclassified	unclassified	unclassified	unclassified
Otu00223	Bacteria	Proteobacteria	Gammaproteobacteria	unclassified	unclassified	unclassified
Otu00224	Bacteria	Proteobacteria	Alphaproteobacteria	Rhodobacterales	Rhodobacteraceae	Pseudoruegeria
Otu00225	Bacteria	Proteobacteria	Gammaproteobacteria	Legionellales	Legionellaceae	unclassified
Otu00226	Bacteria	Acidobacteria	Solibacteres	Solibacterales	PAUC26f	unclassified
Otu00227	Bacteria	Firmicutes	Bacilli	Bacillales	Planococcaceae	Psychrobacillus
Otu00228	Bacteria	Proteobacteria	unclassified	unclassified	unclassified	unclassified
Otu00229	Bacteria	Proteobacteria	Alphaproteobacteria	Rhodobacterales	Rhodobacteraceae	unclassified
Otu00230	Bacteria	Bacteroidetes	Cytophagia	Cytophagales	Flammeovirgaceae	Reichenbachiella
Otu00231	Bacteria	Proteobacteria	Alphaproteobacteria	Rhodobacterales	Rhodobacteraceae	unclassified
Otu00232	Bacteria	Bacteroidetes	Flavobacteriia	Flavobacteriales	Flavobacteriaceae	unclassified
Otu00233	Bacteria	Proteobacteria	Alphaproteobacteria	Rhodobacterales	Rhodobacteraceae	unclassified
Otu00234	Bacteria	Proteobacteria	Alphaproteobacteria	unclassified	unclassified	unclassified
Otu00235	Bacteria	Proteobacteria	Gammaproteobacteria	Oceanospirillales	unclassified	unclassified
Otu00236	Bacteria	Proteobacteria	Gammaproteobacteria	unclassified	unclassified	unclassified
Otu00237	Bacteria	Proteobacteria	Alphaproteobacteria	Rhizobiales	Phyllobacteriaceae	unclassified
Otu00238	Bacteria	Proteobacteria	Gammaproteobacteria	Legionellales	unclassified	unclassified
Otu00239	Bacteria	Cyanobacteria	4C0d-2	MLE1-12	unclassified	unclassified
Otu00240	Bacteria	Proteobacteria	Gammaproteobacteria	unclassified	unclassified	unclassified
Otu00241	Bacteria	Proteobacteria	Gammaproteobacteria	Alteromonadales	Alteromonadaceae	Alteromonas
Otu00242	Bacteria	Proteobacteria	Alphaproteobacteria	unclassified	unclassified	unclassified
Otu00243	Bacteria	Cyanobacteria	Synechococcophycideae	Synechococcales	Synechococcaceae	Synechococcus
Otu00244	Bacteria	Proteobacteria	Alphaproteobacteria	unclassified	unclassified	unclassified
Otu00245	Bacteria	Proteobacteria	Gammaproteobacteria	unclassified	unclassified	unclassified
Otu00246	Bacteria	Verrucomicrobia	Opitutae	[Pelagicoccales]	[Pelagicoccaceae]	Pelagicoccus
Otu00247	Bacteria	Firmicutes	Bacilli	Bacillales	Staphylococcaceae	Staphylococcus
Otu00248	Bacteria	Bacteroidetes	Flavobacteriia	Flavobacteriales	Flavobacteriaceae	Flavobacterium
Otu00249	Bacteria	Proteobacteria	Alphaproteobacteria	unclassified	unclassified	unclassified
Otu00250	Bacteria	Proteobacteria	Alphaproteobacteria	Caulobacterales	Caulobacteraceae	unclassified
Otu00251	Bacteria	Proteobacteria	Alphaproteobacteria	unclassified	unclassified	unclassified
Otu00252	Bacteria	Bacteroidetes	unclassified	unclassified	unclassified	unclassified
Otu00253	Bacteria	Proteobacteria	Alphaproteobacteria	unclassified	unclassified	unclassified
Otu00254	Bacteria	Proteobacteria	Deltaproteobacteria	Desulfobacterales	Nitrospinaceae	Nitrospina
Otu00255	Bacteria	Proteobacteria	Deltaproteobacteria	unclassified	unclassified	unclassified
Otu00256	Bacteria	Proteobacteria	unclassified	unclassified	unclassified	unclassified
Otu00257	Bacteria	Proteobacteria	Betaproteobacteria	Methylophilales	Methylophilaceae	unclassified
Otu00258	Bacteria	Proteobacteria	Alphaproteobacteria	Rhodobacterales	Rhodobacteraceae	unclassified
Otu00259	Bacteria	Proteobacteria	Gammaproteobacteria	unclassified	unclassified	unclassified
Otu00260	Bacteria	Bacteroidetes	Flavobacteriia	Flavobacteriales	Flavobacteriaceae	Sediminicola
Otu00261	Bacteria	Proteobacteria	Gammaproteobacteria	Alteromonadales	HTCC2188	HTCC
Otu00262	Bacteria	TM7	TM7-1	unclassified	unclassified	unclassified
Otu00263	Bacteria	Proteobacteria	Alphaproteobacteria	unclassified	unclassified	unclassified
Otu00264	Bacteria	Proteobacteria	Gammaproteobacteria	Oceanospirillales	Oceanospirillaceae	Marinomonas
Otu00265	Bacteria	Proteobacteria	Gammaproteobacteria	Oceanospirillales	unclassified	unclassified
Otu00266	Bacteria	Proteobacteria	Deltaproteobacteria	Bdellovibrionales	Bdellovibrionaceae	Bdellovibrio
Otu00267	Bacteria	Proteobacteria	Gammaproteobacteria	Alteromonadales	Alteromonadaceae	unclassified
Otu00268	Bacteria	Proteobacteria	Gammaproteobacteria	Alteromonadales	Alteromonadaceae	Glaciecola
Otu00269	Bacteria	Proteobacteria	Alphaproteobacteria	Rhizobiales	unclassified	unclassified
Otu00270	Bacteria	Proteobacteria	unclassified	unclassified	unclassified	unclassified
Otu00271	Bacteria	unclassified	unclassified	unclassified	unclassified	unclassified
Otu00272	Bacteria	Proteobacteria	Gammaproteobacteria	unclassified	unclassified	unclassified
Otu00273	Bacteria	Proteobacteria	Deltaproteobacteria	Bdellovibrionales	Bdellovibrionaceae	Bdellovibrio
Otu00274	Bacteria	Proteobacteria	Deltaproteobacteria	unclassified	unclassified	unclassified
Otu00275	Bacteria	Proteobacteria	Alphaproteobacteria	unclassified	unclassified	unclassified
Otu00276	Bacteria	unclassified	unclassified	unclassified	unclassified	unclassified
Otu00277	Bacteria	Actinobacteria	Actinobacteria	Actinomycetales	Propionibacteriaceae	Propionibacterium
Otu00278	Bacteria	Proteobacteria	unclassified	unclassified	unclassified	unclassified
Otu00279	Bacteria	Cyanobacteria	4C0d-2	MLE1-12	unclassified	unclassified
Otu00280	Bacteria	Proteobacteria	Gammaproteobacteria	Alteromonadales	Colwelliaceae	unclassified
Otu00281	Bacteria	Bacteroidetes	Flavobacteriia	Flavobacteriales	Cryomorphaceae	unclassified
Otu00282	Bacteria	Proteobacteria	Gammaproteobacteria	Legionellales	Coxiellaceae	Coxiella
Otu00283	Bacteria	Proteobacteria	Gammaproteobacteria	HTCC2188	HTCC2089	unclassified
Otu00284	Bacteria	Proteobacteria	Gammaproteobacteria	unclassified	unclassified	unclassified
Otu00285	Bacteria	Proteobacteria	Alphaproteobacteria	Rickettsiales	Pelagibacteraceae	unclassified
Otu00286	Bacteria	Bacteroidetes	Flavobacteriia	Flavobacteriales	Cryomorphaceae	Crocinitomix
Otu00287	Bacteria	Proteobacteria	Alphaproteobacteria	unclassified	unclassified	unclassified
Otu00288	Bacteria	Cyanobacteria	4C0d-2	MLE1-12	unclassified	unclassified
Otu00289	Bacteria	Tenericutes	Mollicutes	Mycoplasmatales	Mycoplasmataceae	Mycoplasma
Otu00290	Bacteria	Proteobacteria	Gammaproteobacteria	Thiotrichales	Piscirickettsiaceae	unclassified
Otu00291	Bacteria	Firmicutes	Clostridia	Clostridiales	[Tissierellaceae]	Finegoldia
Otu00292	Bacteria	Proteobacteria	Gammaproteobacteria	Oceanospirillales	Halomonadaceae	Candidatus_Portiera
Otu00293	Bacteria	Bacteroidetes	Flavobacteriia	Flavobacteriales	Flavobacteriaceae	unclassified
Otu00294	Bacteria	Proteobacteria	Gammaproteobacteria	unclassified	unclassified	unclassified
Otu00295	Bacteria	Proteobacteria	Gammaproteobacteria	unclassified	unclassified	unclassified
Otu00296	Bacteria	Proteobacteria	unclassified	unclassified	unclassified	unclassified
Otu00297	Bacteria	Firmicutes	Bacilli	Lactobacillales	Streptococcaceae	Streptococcus
Otu00298	Bacteria	Proteobacteria	Alphaproteobacteria	unclassified	unclassified	unclassified
Otu00299	Bacteria	Proteobacteria	unclassified	unclassified	unclassified	unclassified
Otu00300	Bacteria	Proteobacteria	Gammaproteobacteria	unclassified	unclassified	unclassified
Otu00301	Bacteria	Proteobacteria	Gammaproteobacteria	Pasteurellales	Pasteurellaceae	Haemophilus
Otu00302	Bacteria	Proteobacteria	Gammaproteobacteria	unclassified	unclassified	unclassified
Otu00303	Bacteria	unclassified	unclassified	unclassified	unclassified	unclassified
Otu00304	Bacteria	Proteobacteria	Alphaproteobacteria	Rhizobiales	Bradyrhizobiaceae	Bradyrhizobium
Otu00305	Bacteria	Proteobacteria	Gammaproteobacteria	unclassified	unclassified	unclassified
Otu00306	Bacteria	Proteobacteria	Gammaproteobacteria	Oceanospirillales	Oceanospirillaceae	Marinomonas
Otu00307	Bacteria	Cyanobacteria	4C0d-2	MLE1-12	unclassified	unclassified
Otu00308	Bacteria	Cyanobacteria	4C0d-2	MLE1-12	unclassified	unclassified
Otu00309	Bacteria	Proteobacteria	Gammaproteobacteria	Xanthomonadales	Sinobacteraceae	unclassified
Otu00310	Bacteria	Proteobacteria	Gammaproteobacteria	Thiotrichales	Piscirickettsiaceae	Methylophaga
Otu00311	Bacteria	Proteobacteria	Alphaproteobacteria	Sphingomonadales	Sphingomonadaceae	Sphingomonas
Otu00312	Bacteria	Proteobacteria	Alphaproteobacteria	unclassified	unclassified	unclassified
Otu00313	Bacteria	Firmicutes	Bacilli	Lactobacillales	Carnobacteriaceae	Granulicatella
Otu00314	Bacteria	unclassified	unclassified	unclassified	unclassified	unclassified
Otu00315	Bacteria	Proteobacteria	Betaproteobacteria	Methylophilales	Methylophilaceae	unclassified
Otu00316	Bacteria	Bacteroidetes	Cytophagia	Cytophagales	Flammeovirgaceae	Roseivirga
Otu00317	Bacteria	unclassified	unclassified	unclassified	unclassified	unclassified
Otu00318	Bacteria	Proteobacteria	Deltaproteobacteria	Bdellovibrionales	Bdellovibrionaceae	Bdellovibrio
Otu00319	Bacteria	Proteobacteria	unclassified	unclassified	unclassified	unclassified
Otu00320	Bacteria	Proteobacteria	Gammaproteobacteria	unclassified	unclassified	unclassified
Otu00321	Bacteria	Proteobacteria	Betaproteobacteria	Methylophilales	Methylophilaceae	unclassified
Otu00322	Bacteria	Firmicutes	Bacilli	Lactobacillales	Lactobacillaceae	Lactobacillus
Otu00323	Bacteria	Proteobacteria	Alphaproteobacteria	unclassified	unclassified	unclassified
Otu00324	Bacteria	Proteobacteria	unclassified	unclassified	unclassified	unclassified
Otu00325	Bacteria	Bacteroidetes	Bacteroidia	Bacteroidales	Prevotellaceae	Prevotella
Otu00326	Bacteria	Proteobacteria	Alphaproteobacteria	unclassified	unclassified	unclassified
Otu00327	Bacteria	Proteobacteria	Epsilonproteobacteria	Campylobacterales	Campylobacteraceae	Arcobacter
Otu00328	Bacteria	Proteobacteria	Alphaproteobacteria	unclassified	unclassified	unclassified
Otu00329	Bacteria	Proteobacteria	Alphaproteobacteria	Rickettsiales	Pelagibacteraceae	unclassified
Otu00330	Bacteria	Bacteroidetes	unclassified	unclassified	unclassified	unclassified
Otu00331	Bacteria	Cyanobacteria	unclassified	unclassified	unclassified	unclassified
Otu00332	Bacteria	Actinobacteria	Acidimicrobiia	Acidimicrobiales	JdFBGBact	unclassified
Otu00333	Bacteria	Firmicutes	Bacilli	Lactobacillales	Streptococcaceae	Streptococcus
Otu00334	Bacteria	Proteobacteria	Alphaproteobacteria	unclassified	unclassified	unclassified
Otu00335	Bacteria	Proteobacteria	Alphaproteobacteria	Rhizobiales	Hyphomicrobiaceae	Devosia
Otu00336	Bacteria	Cyanobacteria	4C0d-2	MLE1-12	unclassified	unclassified
Otu00337	Bacteria	Firmicutes	Clostridia	Clostridiales	[Tissierellaceae]	Parvimonas
Otu00338	Bacteria	Cyanobacteria	4C0d-2	MLE1-12	unclassified	unclassified
Otu00339	Bacteria	Proteobacteria	Gammaproteobacteria	unclassified	unclassified	unclassified
Otu00340	Bacteria	Proteobacteria	Alphaproteobacteria	Rhodobacterales	Rhodobacteraceae	unclassified
Otu00341	Bacteria	Cyanobacteria	4C0d-2	MLE1-12	unclassified	unclassified
Otu00342	Bacteria	Proteobacteria	Alphaproteobacteria	Rhizobiales	Phyllobacteriaceae	unclassified
Otu00343	Bacteria	SAR406	AB16	Arctic96B-7	A714017	ZA3312c
Otu00344	Bacteria	Cyanobacteria	4C0d-2	MLE1-12	unclassified	unclassified
Otu00345	Bacteria	Proteobacteria	Gammaproteobacteria	Enterobacteriales	Enterobacteriaceae	unclassified
Otu00346	Bacteria	Proteobacteria	Alphaproteobacteria	Rickettsiales	Pelagibacteraceae	unclassified
Otu00347	Bacteria	Proteobacteria	unclassified	unclassified	unclassified	unclassified
Otu00348	Bacteria	Proteobacteria	Gammaproteobacteria	Oceanospirillales	SUP05	unclassified
Otu00349	Bacteria	Proteobacteria	Gammaproteobacteria	Chromatiales	unclassified	unclassified
Otu00350	Bacteria	Proteobacteria	Gammaproteobacteria	unclassified	unclassified	unclassified
Otu00351	Bacteria	Proteobacteria	Alphaproteobacteria	Rhodobacterales	Rhodobacteraceae	Antarctobacter
Otu00352	Bacteria	Proteobacteria	Alphaproteobacteria	Rhodobacterales	Rhodobacteraceae	unclassified
Otu00353	Bacteria	Lentisphaerae	[Lentisphaeria]	Lentisphaerales	Lentisphaeraceae	unclassified
Otu00354	Bacteria	Firmicutes	Bacilli	Gemellales	Gemellaceae	Gemella
Otu00355	Bacteria	Cyanobacteria	4C0d-2	MLE1-12	unclassified	unclassified
Otu00356	Bacteria	Proteobacteria	Deltaproteobacteria	Bdellovibrionales	Bdellovibrionaceae	Bdellovibrio
Otu00357	Bacteria	Bacteroidetes	Cytophagia	Cytophagales	Flammeovirgaceae	unclassified
Otu00358	Bacteria	Proteobacteria	Alphaproteobacteria	Rhodobacterales	Rhodobacteraceae	Octadecabacter
Otu00359	Bacteria	Proteobacteria	Gammaproteobacteria	Legionellales	Coxiellaceae	Coxiella
Otu00360	Bacteria	Proteobacteria	Gammaproteobacteria	Alteromonadales	Alteromonadaceae	unclassified
Otu00361	Bacteria	Proteobacteria	unclassified	unclassified	unclassified	unclassified
Otu00362	Bacteria	Planctomycetes	OM190	CL500-15	unclassified	unclassified
Otu00363	Bacteria	Proteobacteria	unclassified	unclassified	unclassified	unclassified
Otu00364	Bacteria	Proteobacteria	Alphaproteobacteria	Sphingomonadales	Sphingomonadaceae	unclassified
Otu00365	Bacteria	Proteobacteria	Alphaproteobacteria	BD7-3	unclassified	unclassified
Otu00366	Bacteria	unclassified	unclassified	unclassified	unclassified	unclassified
Otu00367	Bacteria	Proteobacteria	Alphaproteobacteria	unclassified	unclassified	unclassified
Otu00368	Bacteria	Proteobacteria	Betaproteobacteria	Methylophilales	Methylophilaceae	unclassified
Otu00369	Bacteria	Proteobacteria	Gammaproteobacteria	unclassified	unclassified	unclassified
Otu00370	Bacteria	Proteobacteria	Gammaproteobacteria	unclassified	unclassified	unclassified
Otu00371	Bacteria	Proteobacteria	Gammaproteobacteria	Pseudomonadales	Pseudomonadaceae	Pseudomonas
Otu00372	Bacteria	Proteobacteria	Alphaproteobacteria	Rhodobacterales	Rhodobacteraceae	Ruegeria
Otu00373	Bacteria	Firmicutes	Bacilli	Lactobacillales	Streptococcaceae	Streptococcus
Otu00374	Bacteria	Proteobacteria	Gammaproteobacteria	Oceanospirillales	Oceanospirillaceae	Marinomonas
Otu00375	Bacteria	Proteobacteria	Alphaproteobacteria	unclassified	unclassified	unclassified
Otu00376	Bacteria	Proteobacteria	Gammaproteobacteria	Vibrionales	Vibrionaceae	Vibrio
Otu00377	Bacteria	Proteobacteria	Gammaproteobacteria	Alteromonadales	Alteromonadaceae	Marinobacter
Otu00378	Bacteria	Proteobacteria	unclassified	unclassified	unclassified	unclassified
Otu00379	Bacteria	Bacteroidetes	unclassified	unclassified	unclassified	unclassified
Otu00380	Bacteria	Proteobacteria	Alphaproteobacteria	unclassified	unclassified	unclassified
Otu00381	Bacteria	Bacteroidetes	Flavobacteriia	Flavobacteriales	Flavobacteriaceae	Olleya
Otu00382	Bacteria	Proteobacteria	Gammaproteobacteria	Enterobacteriales	Enterobacteriaceae	Enterobacter
Otu00383	Bacteria	Cyanobacteria	4C0d-2	MLE1-12	unclassified	unclassified
Otu00384	Bacteria	Proteobacteria	unclassified	unclassified	unclassified	unclassified
Otu00385	Bacteria	Proteobacteria	Gammaproteobacteria	Alteromonadales	Alteromonadaceae	Alteromonas
Otu00386	Bacteria	Proteobacteria	Alphaproteobacteria	unclassified	unclassified	unclassified
Otu00387	Bacteria	Proteobacteria	unclassified	unclassified	unclassified	unclassified
Otu00388	Bacteria	Proteobacteria	Gammaproteobacteria	Alteromonadales	Alteromonadaceae	Glaciecola
Otu00389	Bacteria	Bacteroidetes	Flavobacteriia	Flavobacteriales	Flavobacteriaceae	unclassified
Otu00390	Bacteria	Proteobacteria	Deltaproteobacteria	Bdellovibrionales	Bacteriovoracaceae	Bacteriovorax
Otu00391	Bacteria	Proteobacteria	Alphaproteobacteria	unclassified	unclassified	unclassified
Otu00392	Bacteria	Proteobacteria	Gammaproteobacteria	Legionellales	Francisellaceae	unclassified
Otu00393	Bacteria	Proteobacteria	Alphaproteobacteria	Rhodobacterales	Rhodobacteraceae	unclassified
Otu00394	Bacteria	Proteobacteria	Alphaproteobacteria	Rhizobiales	Hyphomicrobiaceae	Hyphomicrobium
Otu00395	Bacteria	Bacteroidetes	[Saprospirae]	[Saprospirales]	Saprospiraceae	unclassified
Otu00396	Bacteria	Proteobacteria	unclassified	unclassified	unclassified	unclassified
Otu00397	Bacteria	Proteobacteria	Gammaproteobacteria	unclassified	unclassified	unclassified
Otu00398	Bacteria	Firmicutes	Clostridia	Clostridiales	Veillonellaceae	Veillonella
Otu00399	Bacteria	Firmicutes	Bacilli	Lactobacillales	Carnobacteriaceae	Granulicatella
Otu00400	Bacteria	Proteobacteria	Gammaproteobacteria	unclassified	unclassified	unclassified
Otu00401	Bacteria	Proteobacteria	unclassified	unclassified	unclassified	unclassified
Otu00402	Bacteria	Proteobacteria	Alphaproteobacteria	Rickettsiales	Pelagibacteraceae	unclassified
Otu00403	Bacteria	Proteobacteria	Alphaproteobacteria	unclassified	unclassified	unclassified
Otu00404	Bacteria	unclassified	unclassified	unclassified	unclassified	unclassified
Otu00405	Bacteria	Proteobacteria	Betaproteobacteria	Burkholderiales	Oxalobacteraceae	Massilia
Otu00406	Bacteria	Proteobacteria	Gammaproteobacteria	Thiohalorhabdales	unclassified	unclassified
Otu00407	Bacteria	Proteobacteria	unclassified	unclassified	unclassified	unclassified
Otu00408	Bacteria	Bacteroidetes	Flavobacteriia	Flavobacteriales	Flavobacteriaceae	Polaribacter
Otu00409	Bacteria	Proteobacteria	Deltaproteobacteria	Bdellovibrionales	Bdellovibrionaceae	Bdellovibrio
Otu00410	Bacteria	Bacteroidetes	Flavobacteriia	Flavobacteriales	Flavobacteriaceae	unclassified
Otu00411	Bacteria	Bacteroidetes	Bacteroidia	Bacteroidales	unclassified	unclassified
Otu00412	Bacteria	Proteobacteria	Gammaproteobacteria	unclassified	unclassified	unclassified
Otu00413	Bacteria	Proteobacteria	Alphaproteobacteria	Rhodobacterales	Rhodobacteraceae	unclassified
Otu00414	Bacteria	Bacteroidetes	Flavobacteriia	Flavobacteriales	Flavobacteriaceae	Bizionia
Otu00415	Bacteria	Verrucomicrobia	Verrucomicrobiae	Verrucomicrobiales	Verrucomicrobiaceae	Verrucomicrobium
Otu00416	Bacteria	Proteobacteria	Epsilonproteobacteria	Campylobacterales	Campylobacteraceae	Arcobacter
Otu00417	Bacteria	Proteobacteria	Alphaproteobacteria	Kiloniellales	Kiloniellaceae	unclassified
Otu00418	Bacteria	Firmicutes	Bacilli	Bacillales	Staphylococcaceae	Staphylococcus
Otu00419	Bacteria	Proteobacteria	Gammaproteobacteria	unclassified	unclassified	unclassified
Otu00420	Bacteria	Proteobacteria	Alphaproteobacteria	Rhodobacterales	Rhodobacteraceae	unclassified
Otu00421	Bacteria	Proteobacteria	Alphaproteobacteria	unclassified	unclassified	unclassified
Otu00422	Bacteria	Proteobacteria	Alphaproteobacteria	unclassified	unclassified	unclassified
Otu00423	Bacteria	Firmicutes	Bacilli	Lactobacillales	Aerococcaceae	Alkalibacterium
Otu00424	Bacteria	Proteobacteria	Alphaproteobacteria	Rickettsiales	Pelagibacteraceae	unclassified
Otu00425	Bacteria	Proteobacteria	Alphaproteobacteria	Rhizobiales	Hyphomicrobiaceae	Devosia
Otu00426	Bacteria	Proteobacteria	Alphaproteobacteria	Kiloniellales	Kiloniellaceae	Thalassospira
Otu00427	Bacteria	Proteobacteria	Alphaproteobacteria	Rhodobacterales	Rhodobacteraceae	unclassified
Otu00428	Bacteria	Proteobacteria	Alphaproteobacteria	Rhodobacterales	Rhodobacteraceae	unclassified
Otu00429	Bacteria	Planctomycetes	Phycisphaerae	Phycisphaerales	Phycisphaeraceae	unclassified
Otu00430	Bacteria	Proteobacteria	Alphaproteobacteria	Rhizobiales	Phyllobacteriaceae	Ahrensia
Otu00431	Bacteria	Proteobacteria	Gammaproteobacteria	unclassified	unclassified	unclassified
Otu00432	Bacteria	unclassified	unclassified	unclassified	unclassified	unclassified
Otu00433	Bacteria	Proteobacteria	Alphaproteobacteria	Rhodobacterales	Rhodobacteraceae	unclassified
Otu00434	Bacteria	Firmicutes	Bacilli	Lactobacillales	Aerococcaceae	Alkalibacterium
Otu00435	Bacteria	Proteobacteria	Alphaproteobacteria	Rhodobacterales	Rhodobacteraceae	unclassified
Otu00436	Bacteria	Proteobacteria	unclassified	unclassified	unclassified	unclassified
Otu00437	Bacteria	Proteobacteria	Gammaproteobacteria	Vibrionales	Vibrionaceae	Vibrio
Otu00438	Bacteria	unclassified	unclassified	unclassified	unclassified	unclassified
Otu00439	Bacteria	Bacteroidetes	Flavobacteriia	Flavobacteriales	Flavobacteriaceae	Flavobacterium
Otu00440	Bacteria	Proteobacteria	Alphaproteobacteria	BD7-3	unclassified	unclassified
Otu00441	Bacteria	Proteobacteria	Alphaproteobacteria	Rhizobiales	Hyphomicrobiaceae	Devosia
Otu00442	Bacteria	Proteobacteria	Gammaproteobacteria	unclassified	unclassified	unclassified
Otu00443	Bacteria	Proteobacteria	Gammaproteobacteria	unclassified	unclassified	unclassified
Otu00444	Bacteria	Proteobacteria	Alphaproteobacteria	Rhodospirillales	Rhodospirillaceae	Thalassobaculum
Otu00445	Bacteria	Proteobacteria	Gammaproteobacteria	unclassified	unclassified	unclassified
Otu00446	Bacteria	Actinobacteria	Actinobacteria	Actinomycetales	Mycobacteriaceae	Mycobacterium
Otu00447	Bacteria	Proteobacteria	Gammaproteobacteria	unclassified	unclassified	unclassified
Otu00448	Bacteria	Proteobacteria	Gammaproteobacteria	unclassified	unclassified	unclassified
Otu00449	Bacteria	Proteobacteria	Alphaproteobacteria	unclassified	unclassified	unclassified
Otu00450	Bacteria	Gemmatimonadetes	Gemm-2	unclassified	unclassified	unclassified
Otu00451	Bacteria	Proteobacteria	Alphaproteobacteria	unclassified	unclassified	unclassified
Otu00452	Bacteria	Proteobacteria	Gammaproteobacteria	unclassified	unclassified	unclassified
Otu00453	Bacteria	Proteobacteria	Gammaproteobacteria	unclassified	unclassified	unclassified
Otu00454	Bacteria	Verrucomicrobia	Verrucomicrobiae	Verrucomicrobiales	Verrucomicrobiaceae	Persicirhabdus
Otu00455	Bacteria	Proteobacteria	Deltaproteobacteria	Bdellovibrionales	Bdellovibrionaceae	Bdellovibrio
Otu00456	Bacteria	Proteobacteria	Gammaproteobacteria	unclassified	unclassified	unclassified
Otu00457	Bacteria	Proteobacteria	Gammaproteobacteria	Alteromonadales	Alteromonadaceae	unclassified
Otu00458	Bacteria	Proteobacteria	Gammaproteobacteria	Thiohalorhabdales	unclassified	unclassified
Otu00459	Bacteria	Proteobacteria	Alphaproteobacteria	unclassified	unclassified	unclassified
Otu00460	Bacteria	Proteobacteria	Gammaproteobacteria	Oceanospirillales	Oceanospirillaceae	unclassified
Otu00461	Bacteria	Cyanobacteria	4C0d-2	MLE1-12	unclassified	unclassified
Otu00462	Bacteria	Proteobacteria	Gammaproteobacteria	Oceanospirillales	Halomonadaceae	Halomonas
Otu00463	Bacteria	Proteobacteria	Gammaproteobacteria	Vibrionales	Vibrionaceae	Vibrio
Otu00464	Bacteria	Proteobacteria	Alphaproteobacteria	Rickettsiales	Pelagibacteraceae	unclassified
Otu00465	Bacteria	Proteobacteria	Gammaproteobacteria	Oceanospirillales	unclassified	unclassified
Otu00466	Bacteria	Proteobacteria	Gammaproteobacteria	unclassified	unclassified	unclassified
Otu00467	Bacteria	Proteobacteria	Gammaproteobacteria	Alteromonadales	Alteromonadaceae	Alteromonas
Otu00468	Bacteria	Proteobacteria	Alphaproteobacteria	unclassified	unclassified	unclassified
Otu00469	Bacteria	Proteobacteria	Alphaproteobacteria	Rickettsiales	Pelagibacteraceae	unclassified
Otu00470	Bacteria	Proteobacteria	Alphaproteobacteria	unclassified	unclassified	unclassified
Otu00471	Bacteria	Proteobacteria	Gammaproteobacteria	unclassified	unclassified	unclassified
Otu00472	Bacteria	Proteobacteria	Alphaproteobacteria	unclassified	unclassified	unclassified
Otu00473	Bacteria	Proteobacteria	Deltaproteobacteria	Bdellovibrionales	Bdellovibrionaceae	Bdellovibrio
Otu00474	Bacteria	Proteobacteria	unclassified	unclassified	unclassified	unclassified
Otu00475	Bacteria	Proteobacteria	Deltaproteobacteria	unclassified	unclassified	unclassified
Otu00476	Bacteria	Bacteroidetes	Cytophagia	Cytophagales	Cytophagaceae	Leadbetterella
Otu00477	Bacteria	Proteobacteria	Gammaproteobacteria	unclassified	unclassified	unclassified
Otu00478	Bacteria	Proteobacteria	unclassified	unclassified	unclassified	unclassified
Otu00479	Bacteria	Chlorobi	OPB56	unclassified	unclassified	unclassified
Otu00480	Bacteria	Proteobacteria	Gammaproteobacteria	Alteromonadales	OM60	unclassified
Otu00481	Bacteria	Proteobacteria	Gammaproteobacteria	Pseudomonadales	Pseudomonadaceae	Pseudomonas
Otu00482	Bacteria	Cyanobacteria	4C0d-2	MLE1-12	unclassified	unclassified
Otu00483	Bacteria	Proteobacteria	Gammaproteobacteria	unclassified	unclassified	unclassified
Otu00484	Bacteria	Proteobacteria	Alphaproteobacteria	Kiloniellales	Kiloniellaceae	Thalassospira
Otu00485	Bacteria	Proteobacteria	Alphaproteobacteria	Rickettsiales	Pelagibacteraceae	unclassified
Otu00486	Bacteria	Proteobacteria	Gammaproteobacteria	Alteromonadales	unclassified	unclassified
Otu00487	Bacteria	Proteobacteria	Gammaproteobacteria	Vibrionales	Vibrionaceae	Vibrio
Otu00488	Bacteria	Proteobacteria	Deltaproteobacteria	Desulfobacterales	Nitrospinaceae	Nitrospina
Otu00489	Bacteria	Firmicutes	Bacilli	Lactobacillales	Streptococcaceae	Lactococcus
Otu00490	Bacteria	Proteobacteria	Alphaproteobacteria	unclassified	unclassified	unclassified
Otu00491	Bacteria	Actinobacteria	Actinobacteria	Actinomycetales	Microbacteriaceae	Candidatus_Aquiluna
Otu00492	Bacteria	Proteobacteria	Gammaproteobacteria	Chromatiales	unclassified	unclassified
Otu00493	Bacteria	Proteobacteria	Alphaproteobacteria	unclassified	unclassified	unclassified
Otu00494	Bacteria	Proteobacteria	Epsilonproteobacteria	Campylobacterales	Campylobacteraceae	Arcobacter
Otu00495	Bacteria	Actinobacteria	Actinobacteria	Actinomycetales	Micrococcaceae	Micrococcus
Otu00496	Bacteria	Proteobacteria	Gammaproteobacteria	Xanthomonadales	Sinobacteraceae	unclassified
Otu00497	Bacteria	Proteobacteria	Gammaproteobacteria	Vibrionales	Vibrionaceae	Vibrio
Otu00498	Bacteria	Proteobacteria	Betaproteobacteria	Burkholderiales	Comamonadaceae	unclassified
Otu00499	Bacteria	Proteobacteria	Betaproteobacteria	Burkholderiales	Comamonadaceae	RS62
Otu00500	Bacteria	unclassified	unclassified	unclassified	unclassified	unclassified
Otu00501	Bacteria	Proteobacteria	Gammaproteobacteria	Xanthomonadales	Sinobacteraceae	unclassified
Otu00502	Bacteria	Bacteroidetes	Flavobacteriia	Flavobacteriales	Flavobacteriaceae	Cellulophaga
Otu00503	Bacteria	Proteobacteria	Gammaproteobacteria	Legionellales	Francisellaceae	unclassified
Otu00504	Bacteria	Proteobacteria	Gammaproteobacteria	Alteromonadales	Alteromonadaceae	Alteromonas
Otu00505	Bacteria	Bacteroidetes	unclassified	unclassified	unclassified	unclassified
Otu00506	Bacteria	Proteobacteria	Epsilonproteobacteria	Campylobacterales	Campylobacteraceae	Arcobacter
Otu00507	Bacteria	Proteobacteria	unclassified	unclassified	unclassified	unclassified
Otu00508	Bacteria	Proteobacteria	unclassified	unclassified	unclassified	unclassified
Otu00509	Bacteria	Bacteroidetes	Flavobacteriia	Flavobacteriales	Flavobacteriaceae	unclassified
Otu00510	Bacteria	Proteobacteria	Gammaproteobacteria	unclassified	unclassified	unclassified
Otu00511	Bacteria	Cyanobacteria	4C0d-2	MLE1-12	unclassified	unclassified
Otu00512	Bacteria	Proteobacteria	Gammaproteobacteria	Oceanospirillales	unclassified	unclassified
Otu00513	Bacteria	Proteobacteria	Alphaproteobacteria	Rhodobacterales	Rhodobacteraceae	unclassified
Otu00514	Bacteria	Cyanobacteria	4C0d-2	MLE1-12	unclassified	unclassified
Otu00515	Bacteria	Proteobacteria	Alphaproteobacteria	Ellin329	unclassified	unclassified
Otu00516	Bacteria	Proteobacteria	unclassified	unclassified	unclassified	unclassified
Otu00517	Bacteria	Proteobacteria	Deltaproteobacteria	Bdellovibrionales	Bdellovibrionaceae	Bdellovibrio
Otu00518	Bacteria	Firmicutes	Clostridia	Clostridiales	Veillonellaceae	Veillonella
Otu00519	Bacteria	Proteobacteria	Alphaproteobacteria	Rhodobacterales	Rhodobacteraceae	unclassified
Otu00520	Bacteria	Proteobacteria	Alphaproteobacteria	Rhodobacterales	Rhodobacteraceae	Celeribacter
Otu00521	Bacteria	Proteobacteria	Alphaproteobacteria	Rhodobacterales	Rhodobacteraceae	unclassified
Otu00522	Bacteria	Proteobacteria	Alphaproteobacteria	unclassified	unclassified	unclassified
Otu00523	Bacteria	Proteobacteria	Deltaproteobacteria	unclassified	unclassified	unclassified
Otu00524	Bacteria	Bacteroidetes	[Saprospirae]	[Saprospirales]	Saprospiraceae	Saprospira
Otu00525	Bacteria	Proteobacteria	Gammaproteobacteria	Vibrionales	Vibrionaceae	Vibrio
Otu00526	Bacteria	Bacteroidetes	Flavobacteriia	Flavobacteriales	Cryomorphaceae	Crocinitomix
Otu00527	Bacteria	Bacteroidetes	Flavobacteriia	Flavobacteriales	Flavobacteriaceae	Ulvibacter
Otu00528	Bacteria	Proteobacteria	Alphaproteobacteria	Rhodobacterales	Rhodobacteraceae	Marinovum
Otu00529	Bacteria	Proteobacteria	Alphaproteobacteria	Rhodobacterales	Rhodobacteraceae	Paracoccus
Otu00530	Bacteria	Proteobacteria	Alphaproteobacteria	Rhodobacterales	Rhodobacteraceae	unclassified
Otu00531	Bacteria	Cyanobacteria	4C0d-2	MLE1-12	unclassified	unclassified
Otu00532	Bacteria	Proteobacteria	Alphaproteobacteria	Rhodobacterales	Rhodobacteraceae	unclassified
Otu00533	Bacteria	Proteobacteria	unclassified	unclassified	unclassified	unclassified
Otu00534	Bacteria	Proteobacteria	Gammaproteobacteria	Alteromonadales	Alteromonadaceae	HTCC2207
Otu00535	Bacteria	Proteobacteria	Gammaproteobacteria	unclassified	unclassified	unclassified
Otu00536	Bacteria	Proteobacteria	Betaproteobacteria	Burkholderiales	Comamonadaceae	Acidovorax
Otu00537	Bacteria	unclassified	unclassified	unclassified	unclassified	unclassified
Otu00538	Bacteria	Proteobacteria	Alphaproteobacteria	unclassified	unclassified	unclassified
Otu00539	Bacteria	Proteobacteria	Alphaproteobacteria	Rhodobacterales	Rhodobacteraceae	unclassified
Otu00540	Bacteria	Proteobacteria	Alphaproteobacteria	Kiloniellales	unclassified	unclassified
Otu00541	Bacteria	Planctomycetes	BD7-11	unclassified	unclassified	unclassified
Otu00542	Bacteria	Proteobacteria	Gammaproteobacteria	Pseudomonadales	Pseudomonadaceae	Pseudomonas
Otu00543	Bacteria	Proteobacteria	Gammaproteobacteria	unclassified	unclassified	unclassified
Otu00544	Bacteria	Proteobacteria	Alphaproteobacteria	Rhodobacterales	Rhodobacteraceae	unclassified
Otu00545	Bacteria	Proteobacteria	Alphaproteobacteria	Rhodobacterales	Rhodobacteraceae	Sulfitobacter
Otu00546	Bacteria	Proteobacteria	Alphaproteobacteria	unclassified	unclassified	unclassified
Otu00547	Bacteria	Proteobacteria	Alphaproteobacteria	unclassified	unclassified	unclassified
Otu00548	Bacteria	Proteobacteria	Alphaproteobacteria	Rhizobiales	Phyllobacteriaceae	Phyllobacterium
Otu00549	Bacteria	Proteobacteria	Alphaproteobacteria	unclassified	unclassified	unclassified
Otu00550	Bacteria	Proteobacteria	Alphaproteobacteria	Sphingomonadales	Sphingomonadaceae	unclassified
Otu00551	Bacteria	Proteobacteria	Alphaproteobacteria	Rickettsiales	Pelagibacteraceae	unclassified
Otu00552	Bacteria	Proteobacteria	unclassified	unclassified	unclassified	unclassified
Otu00553	Bacteria	Proteobacteria	Alphaproteobacteria	Rhodobacterales	Rhodobacteraceae	unclassified
Otu00554	Bacteria	Proteobacteria	Alphaproteobacteria	Rhodobacterales	Rhodobacteraceae	unclassified
Otu00555	Bacteria	Firmicutes	Bacilli	Lactobacillales	Streptococcaceae	Streptococcus
Otu00556	Bacteria	Proteobacteria	Deltaproteobacteria	Bdellovibrionales	Bdellovibrionaceae	Bdellovibrio
Otu00557	Bacteria	Bacteroidetes	[Saprospirae]	[Saprospirales]	Saprospiraceae	unclassified
Otu00558	Bacteria	Bacteroidetes	Flavobacteriia	Flavobacteriales	Flavobacteriaceae	unclassified
Otu00559	Bacteria	Actinobacteria	Actinobacteria	Actinomycetales	Micrococcaceae	Rothia
Otu00560	Bacteria	Bacteroidetes	Flavobacteriia	Flavobacteriales	Cryomorphaceae	unclassified
Otu00561	Bacteria	Proteobacteria	Gammaproteobacteria	Legionellales	Francisellaceae	unclassified
Otu00562	Bacteria	Proteobacteria	unclassified	unclassified	unclassified	unclassified
Otu00563	Bacteria	Proteobacteria	Alphaproteobacteria	Rhodobacterales	Rhodobacteraceae	Octadecabacter
Otu00564	Bacteria	Proteobacteria	Gammaproteobacteria	Vibrionales	Vibrionaceae	Vibrio
Otu00565	Bacteria	unclassified	unclassified	unclassified	unclassified	unclassified
Otu00566	Bacteria	Proteobacteria	unclassified	unclassified	unclassified	unclassified
Otu00567	Bacteria	Bacteroidetes	unclassified	unclassified	unclassified	unclassified
Otu00568	Bacteria	Proteobacteria	Alphaproteobacteria	Kiloniellales	unclassified	unclassified
Otu00569	Bacteria	Proteobacteria	Alphaproteobacteria	Rhodobacterales	Rhodobacteraceae	unclassified
Otu00570	Bacteria	Proteobacteria	Deltaproteobacteria	NB1-j	JTB38	unclassified
Otu00571	Bacteria	Proteobacteria	Gammaproteobacteria	Chromatiales	unclassified	unclassified
Otu00572	Bacteria	Proteobacteria	Deltaproteobacteria	Bdellovibrionales	Bdellovibrionaceae	Bdellovibrio
Otu00573	Bacteria	Firmicutes	Bacilli	Lactobacillales	Enterococcaceae	Enterococcus
Otu00574	Bacteria	Proteobacteria	unclassified	unclassified	unclassified	unclassified
Otu00575	Bacteria	Proteobacteria	Gammaproteobacteria	Oceanospirillales	Halomonadaceae	unclassified
Otu00576	Bacteria	Proteobacteria	Alphaproteobacteria	unclassified	unclassified	unclassified
Otu00577	Bacteria	Proteobacteria	Deltaproteobacteria	Desulfobacterales	Nitrospinaceae	Nitrospina
Otu00578	Bacteria	Proteobacteria	Gammaproteobacteria	Vibrionales	Vibrionaceae	Vibrio
Otu00579	Bacteria	Bacteroidetes	unclassified	unclassified	unclassified	unclassified
Otu00580	Bacteria	Proteobacteria	Alphaproteobacteria	Rhodobacterales	Rhodobacteraceae	unclassified
Otu00581	Bacteria	Proteobacteria	Alphaproteobacteria	Rhodobacterales	Rhodobacteraceae	unclassified
Otu00582	Bacteria	Proteobacteria	Alphaproteobacteria	Rickettsiales	Pelagibacteraceae	unclassified
Otu00583	Bacteria	Actinobacteria	Acidimicrobiia	Acidimicrobiales	OCS155	unclassified
Otu00584	Bacteria	Proteobacteria	Gammaproteobacteria	unclassified	unclassified	unclassified
Otu00585	Bacteria	Proteobacteria	Gammaproteobacteria	unclassified	unclassified	unclassified
Otu00586	Bacteria	Bacteroidetes	Flavobacteriia	Flavobacteriales	Flavobacteriaceae	Maribacter
Otu00587	Bacteria	Actinobacteria	Acidimicrobiia	Acidimicrobiales	OCS155	unclassified
Otu00588	Bacteria	Cyanobacteria	4C0d-2	MLE1-12	unclassified	unclassified
Otu00589	Bacteria	Proteobacteria	Gammaproteobacteria	Oceanospirillales	Oceanospirillaceae	Marinomonas
Otu00590	Bacteria	Proteobacteria	unclassified	unclassified	unclassified	unclassified
Otu00591	Bacteria	unclassified	unclassified	unclassified	unclassified	unclassified
Otu00592	Bacteria	Bacteroidetes	Flavobacteriia	Flavobacteriales	Flavobacteriaceae	Muricauda
Otu00593	Bacteria	Proteobacteria	Deltaproteobacteria	Desulfobacterales	Nitrospinaceae	Nitrospina
Otu00594	Bacteria	Firmicutes	Bacilli	Lactobacillales	Streptococcaceae	Streptococcus
Otu00595	Bacteria	Tenericutes	Mollicutes	Acholeplasmatales	Acholeplasmataceae	Acholeplasma
Otu00596	Bacteria	Cyanobacteria	4C0d-2	MLE1-12	unclassified	unclassified
Otu00597	Bacteria	Proteobacteria	unclassified	unclassified	unclassified	unclassified
Otu00598	Bacteria	Proteobacteria	Gammaproteobacteria	unclassified	unclassified	unclassified
Otu00599	Bacteria	Proteobacteria	Alphaproteobacteria	Rickettsiales	Pelagibacteraceae	unclassified
Otu00600	Bacteria	Proteobacteria	Alphaproteobacteria	Rickettsiales	Pelagibacteraceae	Pelagibacter
Otu00601	Bacteria	unclassified	unclassified	unclassified	unclassified	unclassified
Otu00602	Bacteria	Proteobacteria	Gammaproteobacteria	unclassified	unclassified	unclassified
Otu00603	Bacteria	Proteobacteria	Alphaproteobacteria	unclassified	unclassified	unclassified
Otu00604	Bacteria	Proteobacteria	Gammaproteobacteria	Vibrionales	Vibrionaceae	Vibrio
Otu00605	Bacteria	Proteobacteria	Gammaproteobacteria	Oceanospirillales	unclassified	unclassified
Otu00606	Bacteria	Proteobacteria	Gammaproteobacteria	unclassified	unclassified	unclassified
Otu00607	Bacteria	Proteobacteria	Alphaproteobacteria	unclassified	unclassified	unclassified
Otu00608	Bacteria	Proteobacteria	Gammaproteobacteria	Alteromonadales	Alteromonadaceae	Glaciecola
Otu00609	Bacteria	Proteobacteria	unclassified	unclassified	unclassified	unclassified
Otu00610	Bacteria	Firmicutes	Clostridia	Clostridiales	Veillonellaceae	Acidaminococcus
Otu00611	Bacteria	Proteobacteria	unclassified	unclassified	unclassified	unclassified
Otu00612	Bacteria	Verrucomicrobia	Verrucomicrobiae	Verrucomicrobiales	Verrucomicrobiaceae	Persicirhabdus
Otu00613	Bacteria	Proteobacteria	Alphaproteobacteria	Rickettsiales	Pelagibacteraceae	unclassified
Otu00614	Bacteria	Proteobacteria	Betaproteobacteria	Burkholderiales	Comamonadaceae	Acidovorax
Otu00615	Bacteria	Proteobacteria	Alphaproteobacteria	Rhodobacterales	Rhodobacteraceae	unclassified
Otu00616	Bacteria	Proteobacteria	Alphaproteobacteria	Rickettsiales	Pelagibacteraceae	unclassified
Otu00617	Bacteria	Bacteroidetes	Cytophagia	Cytophagales	Flammeovirgaceae	unclassified
Otu00618	Bacteria	GN02	BD1-5	unclassified	unclassified	unclassified
Otu00619	Bacteria	Proteobacteria	unclassified	unclassified	unclassified	unclassified
Otu00620	Bacteria	Proteobacteria	unclassified	unclassified	unclassified	unclassified
Otu00621	Bacteria	Proteobacteria	Alphaproteobacteria	Rhodobacterales	Rhodobacteraceae	unclassified
Otu00622	Bacteria	Firmicutes	Bacilli	Lactobacillales	Streptococcaceae	Streptococcus
Otu00623	Bacteria	Proteobacteria	Deltaproteobacteria	unclassified	unclassified	unclassified
Otu00624	Bacteria	Bacteroidetes	Bacteroidia	Bacteroidales	Porphyromonadaceae	Porphyromonas
Otu00625	Bacteria	Proteobacteria	Gammaproteobacteria	Oceanospirillales	Oleiphilaceae	unclassified
Otu00626	Bacteria	Proteobacteria	Alphaproteobacteria	Rhodospirillales	Rhodospirillaceae	Nisaea
Otu00627	Bacteria	Bacteroidetes	Flavobacteriia	Flavobacteriales	Cryomorphaceae	unclassified
Otu00628	Bacteria	Proteobacteria	Gammaproteobacteria	unclassified	unclassified	unclassified
Otu00629	Bacteria	Proteobacteria	unclassified	unclassified	unclassified	unclassified
Otu00630	Bacteria	Proteobacteria	Alphaproteobacteria	Rhodospirillales	Rhodospirillaceae	unclassified
Otu00631	Bacteria	Proteobacteria	unclassified	unclassified	unclassified	unclassified
Otu00632	Bacteria	Proteobacteria	Alphaproteobacteria	Rickettsiales	Pelagibacteraceae	unclassified
Otu00633	Bacteria	Proteobacteria	Alphaproteobacteria	Rickettsiales	Pelagibacteraceae	unclassified
Otu00634	Bacteria	Proteobacteria	Alphaproteobacteria	unclassified	unclassified	unclassified
Otu00635	Bacteria	unclassified	unclassified	unclassified	unclassified	unclassified
Otu00636	Bacteria	Proteobacteria	Alphaproteobacteria	Rhodobacterales	Rhodobacteraceae	unclassified
Otu00637	Bacteria	Proteobacteria	Gammaproteobacteria	Vibrionales	Vibrionaceae	Vibrio
Otu00638	Bacteria	Cyanobacteria	Oscillatoriophycideae	unclassified	unclassified	unclassified
Otu00639	Bacteria	Proteobacteria	Gammaproteobacteria	Alteromonadales	unclassified	unclassified
Otu00640	Bacteria	Planctomycetes	BD7-11	unclassified	unclassified	unclassified
Otu00641	Bacteria	Proteobacteria	Alphaproteobacteria	Rhodobacterales	Rhodobacteraceae	unclassified
Otu00642	Bacteria	Proteobacteria	unclassified	unclassified	unclassified	unclassified
Otu00643	Bacteria	Proteobacteria	Gammaproteobacteria	Chromatiales	Chromatiaceae	unclassified
Otu00644	Bacteria	Proteobacteria	Epsilonproteobacteria	Campylobacterales	Campylobacteraceae	Arcobacter
Otu00645	Bacteria	Proteobacteria	Gammaproteobacteria	Legionellales	unclassified	unclassified
Otu00646	Bacteria	Proteobacteria	Alphaproteobacteria	Rickettsiales	Pelagibacteraceae	unclassified
Otu00647	Bacteria	Proteobacteria	Deltaproteobacteria	Desulfobacterales	Nitrospinaceae	Nitrospina
Otu00648	Bacteria	Proteobacteria	unclassified	unclassified	unclassified	unclassified
Otu00649	Bacteria	Bacteroidetes	Flavobacteriia	Flavobacteriales	Flavobacteriaceae	unclassified
Otu00650	Bacteria	Proteobacteria	Gammaproteobacteria	unclassified	unclassified	unclassified
Otu00651	Bacteria	Proteobacteria	Gammaproteobacteria	Vibrionales	Vibrionaceae	Vibrio
Otu00652	Bacteria	Cyanobacteria	Synechococcophycideae	Synechococcales	Synechococcaceae	Synechococcus
Otu00653	Bacteria	Proteobacteria	Alphaproteobacteria	Rhodobacterales	Rhodobacteraceae	unclassified
Otu00654	Bacteria	Cyanobacteria	Synechococcophycideae	Synechococcales	Synechococcaceae	Synechococcus
Otu00655	Bacteria	Proteobacteria	Gammaproteobacteria	unclassified	unclassified	unclassified
Otu00656	Bacteria	Proteobacteria	Gammaproteobacteria	Vibrionales	Vibrionaceae	Vibrio
Otu00657	Bacteria	Proteobacteria	unclassified	unclassified	unclassified	unclassified
Otu00658	Bacteria	Proteobacteria	unclassified	unclassified	unclassified	unclassified
Otu00659	Bacteria	unclassified	unclassified	unclassified	unclassified	unclassified
Otu00660	Bacteria	unclassified	unclassified	unclassified	unclassified	unclassified
Otu00661	Bacteria	unclassified	unclassified	unclassified	unclassified	unclassified
Otu00662	Bacteria	Proteobacteria	Gammaproteobacteria	Enterobacteriales	Enterobacteriaceae	unclassified
Otu00663	Bacteria	Proteobacteria	Alphaproteobacteria	unclassified	unclassified	unclassified
Otu00664	Bacteria	Proteobacteria	unclassified	unclassified	unclassified	unclassified
Otu00665	Bacteria	Proteobacteria	Alphaproteobacteria	unclassified	unclassified	unclassified
Otu00666	Bacteria	Proteobacteria	Alphaproteobacteria	unclassified	unclassified	unclassified
Otu00667	Bacteria	Proteobacteria	Gammaproteobacteria	Vibrionales	Vibrionaceae	Vibrio
Otu00668	Bacteria	Proteobacteria	Gammaproteobacteria	Pseudomonadales	Pseudomonadaceae	Pseudomonas
Otu00669	Bacteria	Proteobacteria	Gammaproteobacteria	Vibrionales	Vibrionaceae	unclassified
Otu00670	Bacteria	Proteobacteria	Gammaproteobacteria	Pasteurellales	Pasteurellaceae	Haemophilus
Otu00671	Bacteria	Proteobacteria	unclassified	unclassified	unclassified	unclassified
Otu00672	Bacteria	Proteobacteria	Gammaproteobacteria	Vibrionales	Vibrionaceae	Vibrio
Otu00673	Bacteria	Proteobacteria	Gammaproteobacteria	Alteromonadales	Alteromonadaceae	Alteromonas
Otu00674	Bacteria	Proteobacteria	unclassified	unclassified	unclassified	unclassified
Otu00675	Bacteria	Bacteroidetes	unclassified	unclassified	unclassified	unclassified
Otu00676	Bacteria	Proteobacteria	Deltaproteobacteria	Desulfobacterales	Nitrospinaceae	Nitrospina
Otu00677	Bacteria	Bacteroidetes	Flavobacteriia	Flavobacteriales	unclassified	unclassified
Otu00678	Bacteria	Proteobacteria	Gammaproteobacteria	Alteromonadales	Alteromonadaceae	unclassified
Otu00679	Bacteria	Proteobacteria	Alphaproteobacteria	BD7-3	unclassified	unclassified
Otu00680	Bacteria	Proteobacteria	Deltaproteobacteria	PB19	unclassified	unclassified
Otu00681	Bacteria	Proteobacteria	Gammaproteobacteria	Vibrionales	Vibrionaceae	Vibrio
Otu00682	Bacteria	Bacteroidetes	Flavobacteriia	Flavobacteriales	Cryomorphaceae	unclassified
Otu00683	Bacteria	Proteobacteria	Alphaproteobacteria	Rickettsiales	Pelagibacteraceae	unclassified
Otu00684	Bacteria	Proteobacteria	Gammaproteobacteria	Oceanospirillales	Oceanospirillaceae	Marinomonas
Otu00685	Bacteria	Proteobacteria	Epsilonproteobacteria	Campylobacterales	Campylobacteraceae	Sulfurospirillum
Otu00686	Bacteria	Proteobacteria	Betaproteobacteria	Neisseriales	Neisseriaceae	Neisseria
Otu00687	Bacteria	Proteobacteria	Epsilonproteobacteria	Campylobacterales	Campylobacteraceae	Arcobacter
Otu00688	Bacteria	Proteobacteria	unclassified	unclassified	unclassified	unclassified
Otu00689	Bacteria	Proteobacteria	Gammaproteobacteria	Oceanospirillales	Oleiphilaceae	unclassified
Otu00690	Bacteria	Proteobacteria	Epsilonproteobacteria	Campylobacterales	Campylobacteraceae	Campylobacter
Otu00691	Bacteria	Proteobacteria	Gammaproteobacteria	unclassified	unclassified	unclassified
Otu00692	Bacteria	Proteobacteria	Alphaproteobacteria	Rhodobacterales	Rhodobacteraceae	unclassified
Otu00693	Bacteria	Proteobacteria	Alphaproteobacteria	unclassified	unclassified	unclassified
Otu00694	Bacteria	Proteobacteria	Alphaproteobacteria	unclassified	unclassified	unclassified
Otu00695	Bacteria	Proteobacteria	Alphaproteobacteria	Sphingomonadales	Sphingomonadaceae	unclassified
Otu00696	Bacteria	Proteobacteria	Gammaproteobacteria	unclassified	unclassified	unclassified
Otu00697	Bacteria	Proteobacteria	Deltaproteobacteria	Bdellovibrionales	Bdellovibrionaceae	Bdellovibrio
Otu00698	Bacteria	Proteobacteria	unclassified	unclassified	unclassified	unclassified
Otu00699	Bacteria	Proteobacteria	Gammaproteobacteria	unclassified	unclassified	unclassified
Otu00700	Bacteria	Bacteroidetes	Flavobacteriia	Flavobacteriales	Flavobacteriaceae	unclassified
Otu00701	Bacteria	Proteobacteria	Alphaproteobacteria	unclassified	unclassified	unclassified
Otu00702	Bacteria	Proteobacteria	Deltaproteobacteria	Sva0853	S25_1238	unclassified
Otu00703	Bacteria	Proteobacteria	Gammaproteobacteria	Oceanospirillales	Oceanospirillaceae	unclassified
Otu00704	Bacteria	Proteobacteria	Gammaproteobacteria	Pseudomonadales	Moraxellaceae	Acinetobacter
Otu00705	Bacteria	Proteobacteria	unclassified	unclassified	unclassified	unclassified
Otu00706	Bacteria	Proteobacteria	Epsilonproteobacteria	Campylobacterales	Campylobacteraceae	Arcobacter
Otu00707	Bacteria	Proteobacteria	Epsilonproteobacteria	Campylobacterales	Campylobacteraceae	Arcobacter
Otu00708	Bacteria	Proteobacteria	Alphaproteobacteria	Rhodobacterales	Rhodobacteraceae	unclassified
Otu00709	Bacteria	Bacteroidetes	unclassified	unclassified	unclassified	unclassified
Otu00710	Bacteria	Proteobacteria	Gammaproteobacteria	Pseudomonadales	Pseudomonadaceae	Pseudomonas
Otu00711	Bacteria	Proteobacteria	Gammaproteobacteria	Thiotrichales	Piscirickettsiaceae	unclassified
Otu00712	Bacteria	Proteobacteria	Alphaproteobacteria	Rhizobiales	Bradyrhizobiaceae	unclassified
Otu00713	Bacteria	Tenericutes	Mollicutes	unclassified	unclassified	unclassified
Otu00714	Bacteria	unclassified	unclassified	unclassified	unclassified	unclassified
Otu00715	Bacteria	Proteobacteria	Gammaproteobacteria	unclassified	unclassified	unclassified
Otu00716	Bacteria	Proteobacteria	Epsilonproteobacteria	Campylobacterales	Campylobacteraceae	Arcobacter
Otu00717	Bacteria	Proteobacteria	Alphaproteobacteria	Kiloniellales	unclassified	unclassified
Otu00718	Bacteria	Proteobacteria	Alphaproteobacteria	Rickettsiales	Pelagibacteraceae	unclassified
Otu00719	Bacteria	Proteobacteria	Alphaproteobacteria	Kiloniellales	unclassified	unclassified
Otu00720	Bacteria	Proteobacteria	Gammaproteobacteria	unclassified	unclassified	unclassified
Otu00721	Bacteria	Proteobacteria	unclassified	unclassified	unclassified	unclassified
Otu00722	Bacteria	Bacteroidetes	Flavobacteriia	Flavobacteriales	Flavobacteriaceae	unclassified
Otu00723	Bacteria	Proteobacteria	Alphaproteobacteria	Rhodobacterales	Rhodobacteraceae	unclassified
Otu00724	Bacteria	Proteobacteria	Alphaproteobacteria	Rhodobacterales	Rhodobacteraceae	unclassified
Otu00725	Bacteria	Bacteroidetes	Flavobacteriia	Flavobacteriales	unclassified	unclassified
Otu00726	Bacteria	Proteobacteria	Deltaproteobacteria	Desulfobacterales	unclassified	unclassified
Otu00727	Bacteria	Chloroflexi	Anaerolineae	SBR1031	A4b	unclassified
Otu00728	Bacteria	Bacteroidetes	Flavobacteriia	Flavobacteriales	Flavobacteriaceae	Arenibacter
Otu00729	Bacteria	Proteobacteria	Gammaproteobacteria	unclassified	unclassified	unclassified
Otu00730	Bacteria	Bacteroidetes	Flavobacteriia	Flavobacteriales	Flavobacteriaceae	Flavobacterium
Otu00731	Bacteria	Cyanobacteria	4C0d-2	MLE1-12	unclassified	unclassified
Otu00732	Bacteria	Proteobacteria	Alphaproteobacteria	unclassified	unclassified	unclassified
Otu00733	Bacteria	Proteobacteria	Gammaproteobacteria	unclassified	unclassified	unclassified
Otu00734	Bacteria	unclassified	unclassified	unclassified	unclassified	unclassified
Otu00735	Bacteria	Proteobacteria	Alphaproteobacteria	Rhodobacterales	Rhodobacteraceae	Paracoccus
Otu00736	Bacteria	Proteobacteria	Gammaproteobacteria	Legionellales	unclassified	unclassified
Otu00737	Bacteria	Proteobacteria	Gammaproteobacteria	Alteromonadales	Alteromonadaceae	HTCC2207
Otu00738	Bacteria	Proteobacteria	Gammaproteobacteria	Oceanospirillales	Oceanospirillaceae	Oleibacter
Otu00739	Bacteria	Proteobacteria	unclassified	unclassified	unclassified	unclassified
Otu00740	Bacteria	Bacteroidetes	unclassified	unclassified	unclassified	unclassified
Otu00741	Bacteria	Proteobacteria	Gammaproteobacteria	Vibrionales	Pseudoalteromonadaceae	Pseudoalteromonas
Otu00742	Bacteria	Bacteroidetes	Flavobacteriia	Flavobacteriales	Flavobacteriaceae	unclassified
Otu00743	Bacteria	Proteobacteria	Betaproteobacteria	Burkholderiales	Alcaligenaceae	Denitrobacter
Otu00744	Bacteria	Proteobacteria	Alphaproteobacteria	Rhodobacterales	Rhodobacteraceae	Phaeobacter
Otu00745	Bacteria	Proteobacteria	Deltaproteobacteria	NB1-j	JTB38	unclassified
Otu00746	Bacteria	Proteobacteria	Gammaproteobacteria	unclassified	unclassified	unclassified
Otu00747	Bacteria	Proteobacteria	Alphaproteobacteria	Rhodospirillales	Rhodospirillaceae	unclassified
Otu00748	Bacteria	Proteobacteria	Gammaproteobacteria	Pseudomonadales	Pseudomonadaceae	Pseudomonas
Otu00749	Bacteria	Bacteroidetes	Flavobacteriia	Flavobacteriales	Flavobacteriaceae	Maribacter
Otu00750	Bacteria	Actinobacteria	Acidimicrobiia	Acidimicrobiales	C111	unclassified
Otu00751	Bacteria	Proteobacteria	Alphaproteobacteria	Rhodospirillales	Rhodospirillaceae	unclassified
Otu00752	Bacteria	Actinobacteria	Actinobacteria	Actinomycetales	Micrococcaceae	unclassified
Otu00753	Bacteria	Proteobacteria	Alphaproteobacteria	Rickettsiales	Pelagibacteraceae	unclassified
Otu00754	Bacteria	Proteobacteria	Gammaproteobacteria	unclassified	unclassified	unclassified
Otu00755	Bacteria	Proteobacteria	Alphaproteobacteria	Rickettsiales	Pelagibacteraceae	Pelagibacter
Otu00756	Bacteria	Proteobacteria	Gammaproteobacteria	Alteromonadales	[Chromatiaceae]	unclassified
Otu00757	Bacteria	Proteobacteria	Alphaproteobacteria	unclassified	unclassified	unclassified
Otu00758	Bacteria	Proteobacteria	Deltaproteobacteria	NB1-j	JTB38	unclassified
Otu00759	Bacteria	Proteobacteria	Alphaproteobacteria	Rhodobacterales	Rhodobacteraceae	unclassified
Otu00760	Bacteria	Proteobacteria	Gammaproteobacteria	Legionellales	unclassified	unclassified
Otu00761	Bacteria	Proteobacteria	unclassified	unclassified	unclassified	unclassified
Otu00762	Bacteria	Proteobacteria	Alphaproteobacteria	Rhodobacterales	Rhodobacteraceae	unclassified
Otu00763	Bacteria	Bacteroidetes	unclassified	unclassified	unclassified	unclassified
Otu00764	Bacteria	Bacteroidetes	unclassified	unclassified	unclassified	unclassified
Otu00765	Bacteria	Proteobacteria	Alphaproteobacteria	Rhodobacterales	Rhodobacteraceae	unclassified
Otu00766	Bacteria	GN02	BD1-5	unclassified	unclassified	unclassified
Otu00767	Bacteria	Proteobacteria	Gammaproteobacteria	Xanthomonadales	Xanthomonadaceae	Stenotrophomonas
Otu00768	Bacteria	Proteobacteria	Epsilonproteobacteria	Campylobacterales	Helicobacteraceae	Sulfurimonas
Otu00769	Bacteria	Verrucomicrobia	Verrucomicrobiae	Verrucomicrobiales	Verrucomicrobiaceae	unclassified
Otu00770	Bacteria	Proteobacteria	Gammaproteobacteria	Legionellales	Francisellaceae	Francisella
Otu00771	Bacteria	Proteobacteria	Alphaproteobacteria	Rhodobacterales	Rhodobacteraceae	unclassified
Otu00772	Bacteria	Proteobacteria	Gammaproteobacteria	Enterobacteriales	Enterobacteriaceae	unclassified
Otu00773	Bacteria	Proteobacteria	Gammaproteobacteria	unclassified	unclassified	unclassified
Otu00774	Bacteria	Proteobacteria	Deltaproteobacteria	Bdellovibrionales	Bacteriovoracaceae	unclassified
Otu00775	Bacteria	Actinobacteria	Acidimicrobiia	Acidimicrobiales	unclassified	unclassified
Otu00776	Bacteria	Proteobacteria	Alphaproteobacteria	unclassified	unclassified	unclassified
Otu00777	Bacteria	Proteobacteria	Gammaproteobacteria	Vibrionales	Vibrionaceae	Vibrio
Otu00778	Bacteria	Proteobacteria	Gammaproteobacteria	Vibrionales	Vibrionaceae	Vibrio
Otu00779	Bacteria	Bacteroidetes	Flavobacteriia	Flavobacteriales	Cryomorphaceae	unclassified
Otu00780	Bacteria	Proteobacteria	Alphaproteobacteria	Rhodobacterales	Rhodobacteraceae	unclassified
Otu00781	Bacteria	Bacteroidetes	unclassified	unclassified	unclassified	unclassified
Otu00782	Bacteria	Proteobacteria	Gammaproteobacteria	Oceanospirillales	Oceanospirillaceae	unclassified
Otu00783	Bacteria	Bacteroidetes	Flavobacteriia	Flavobacteriales	Flavobacteriaceae	unclassified
Otu00784	Bacteria	Proteobacteria	Alphaproteobacteria	unclassified	unclassified	unclassified
Otu00785	Bacteria	Proteobacteria	Gammaproteobacteria	Vibrionales	Vibrionaceae	Vibrio
Otu00786	Bacteria	Proteobacteria	Gammaproteobacteria	Oceanospirillales	Oceanospirillaceae	unclassified
Otu00787	Bacteria	Proteobacteria	Gammaproteobacteria	Vibrionales	Vibrionaceae	Vibrio
Otu00788	Bacteria	Proteobacteria	Alphaproteobacteria	Rhodobacterales	Rhodobacteraceae	Ruegeria
Otu00789	Bacteria	Proteobacteria	Gammaproteobacteria	unclassified	unclassified	unclassified
Otu00790	Bacteria	Proteobacteria	Alphaproteobacteria	Rhodobacterales	Rhodobacteraceae	Ruegeria
Otu00791	Bacteria	Proteobacteria	Gammaproteobacteria	Vibrionales	Vibrionaceae	Vibrio
Otu00792	Bacteria	Proteobacteria	Alphaproteobacteria	Rhodobacterales	Rhodobacteraceae	unclassified
Otu00793	Bacteria	Proteobacteria	Gammaproteobacteria	Oceanospirillales	Oceanospirillaceae	unclassified
Otu00794	Bacteria	Proteobacteria	Alphaproteobacteria	Rickettsiales	Pelagibacteraceae	unclassified
Otu00795	Bacteria	Bacteroidetes	Flavobacteriia	Flavobacteriales	Flavobacteriaceae	unclassified
Otu00796	Bacteria	Proteobacteria	unclassified	unclassified	unclassified	unclassified
Otu00797	Bacteria	Proteobacteria	Alphaproteobacteria	Rickettsiales	Pelagibacteraceae	unclassified
Otu00798	Bacteria	Proteobacteria	Gammaproteobacteria	Oceanospirillales	Oleiphilaceae	unclassified
Otu00799	Bacteria	Proteobacteria	Gammaproteobacteria	Alteromonadales	Psychromonadaceae	Psychromonas
Otu00800	Bacteria	Proteobacteria	Alphaproteobacteria	Rhodobacterales	Rhodobacteraceae	unclassified
Otu00801	Bacteria	Proteobacteria	Gammaproteobacteria	Pseudomonadales	Moraxellaceae	Psychrobacter
Otu00802	Bacteria	Tenericutes	Mollicutes	Mycoplasmatales	Mycoplasmataceae	Mycoplasma
Otu00803	Bacteria	Proteobacteria	Gammaproteobacteria	unclassified	unclassified	unclassified
Otu00804	Bacteria	Bacteroidetes	unclassified	unclassified	unclassified	unclassified
Otu00805	Bacteria	Proteobacteria	Alphaproteobacteria	Rhodobacterales	Rhodobacteraceae	Ruegeria
Otu00806	Bacteria	Cyanobacteria	4C0d-2	MLE1-12	unclassified	unclassified
Otu00807	Bacteria	unclassified	unclassified	unclassified	unclassified	unclassified
Otu00808	Bacteria	Proteobacteria	Gammaproteobacteria	Oceanospirillales	Oceanospirillaceae	Oceaniserpentilla
Otu00809	Bacteria	Proteobacteria	Gammaproteobacteria	Legionellales	Legionellaceae	unclassified
Otu00810	Bacteria	Proteobacteria	Alphaproteobacteria	Rickettsiales	Pelagibacteraceae	unclassified
Otu00811	Bacteria	Proteobacteria	Alphaproteobacteria	Rhodobacterales	Rhodobacteraceae	unclassified
Otu00812	Bacteria	Proteobacteria	Gammaproteobacteria	Xanthomonadales	Xanthomonadaceae	Xanthomonas
Otu00813	Bacteria	Proteobacteria	Alphaproteobacteria	unclassified	unclassified	unclassified
Otu00814	Bacteria	Proteobacteria	unclassified	unclassified	unclassified	unclassified
Otu00815	Bacteria	Proteobacteria	Gammaproteobacteria	Enterobacteriales	Enterobacteriaceae	unclassified
Otu00816	Bacteria	Bacteroidetes	Flavobacteriia	Flavobacteriales	Cryomorphaceae	Crocinitomix
Otu00817	Bacteria	Proteobacteria	unclassified	unclassified	unclassified	unclassified
Otu00818	Bacteria	Bacteroidetes	Flavobacteriia	Flavobacteriales	Cryomorphaceae	unclassified
Otu00819	Bacteria	Proteobacteria	Gammaproteobacteria	unclassified	unclassified	unclassified
Otu00820	Bacteria	Bacteroidetes	Bacteroidia	Bacteroidales	Porphyromonadaceae	Porphyromonas
Otu00821	Bacteria	Proteobacteria	Gammaproteobacteria	Oceanospirillales	Oceanospirillaceae	unclassified
Otu00822	Bacteria	Proteobacteria	Gammaproteobacteria	Vibrionales	Vibrionaceae	Vibrio
Otu00823	Bacteria	Proteobacteria	Gammaproteobacteria	Oceanospirillales	Oleiphilaceae	unclassified
Otu00824	Bacteria	Proteobacteria	Gammaproteobacteria	unclassified	unclassified	unclassified
Otu00825	Bacteria	Cyanobacteria	4C0d-2	MLE1-12	unclassified	unclassified
Otu00826	Bacteria	Proteobacteria	Alphaproteobacteria	Rhodobacterales	Rhodobacteraceae	unclassified
Otu00827	Bacteria	Proteobacteria	Gammaproteobacteria	Chromatiales	unclassified	unclassified
Otu00828	Bacteria	Proteobacteria	Gammaproteobacteria	unclassified	unclassified	unclassified
Otu00829	Bacteria	Proteobacteria	Alphaproteobacteria	Rhodobacterales	Rhodobacteraceae	unclassified
Otu00830	Bacteria	Proteobacteria	Gammaproteobacteria	Vibrionales	Vibrionaceae	Vibrio
Otu00831	Bacteria	Proteobacteria	Gammaproteobacteria	Pseudomonadales	Pseudomonadaceae	Pseudomonas
Otu00832	Bacteria	Proteobacteria	unclassified	unclassified	unclassified	unclassified
Otu00833	Bacteria	Proteobacteria	Deltaproteobacteria	Desulfobacterales	Nitrospinaceae	Nitrospina
Otu00834	Bacteria	Proteobacteria	Alphaproteobacteria	unclassified	unclassified	unclassified
Otu00835	Bacteria	Bacteroidetes	Bacteroidia	Bacteroidales	Porphyromonadaceae	Porphyromonas
Otu00836	Bacteria	Proteobacteria	Gammaproteobacteria	Legionellales	Coxiellaceae	Coxiella
Otu00837	Bacteria	Bacteroidetes	unclassified	unclassified	unclassified	unclassified
Otu00838	Bacteria	Proteobacteria	Alphaproteobacteria	BD7-3	unclassified	unclassified
Otu00839	Bacteria	Proteobacteria	Alphaproteobacteria	Sphingomonadales	Sphingomonadaceae	unclassified
Otu00840	Bacteria	GN02	BD1-5	unclassified	unclassified	unclassified
Otu00841	Bacteria	Proteobacteria	Deltaproteobacteria	Desulfobacterales	Nitrospinaceae	Nitrospina
Otu00842	Bacteria	Proteobacteria	Gammaproteobacteria	Oceanospirillales	Halomonadaceae	unclassified
Otu00843	Bacteria	Cyanobacteria	4C0d-2	MLE1-12	unclassified	unclassified
Otu00844	Bacteria	Proteobacteria	Gammaproteobacteria	unclassified	unclassified	unclassified
Otu00845	Bacteria	Actinobacteria	Actinobacteria	Actinomycetales	Microbacteriaceae	Salinibacterium
Otu00846	Bacteria	Proteobacteria	Gammaproteobacteria	Alteromonadales	Alteromonadaceae	unclassified
Otu00847	Bacteria	Proteobacteria	Gammaproteobacteria	Vibrionales	Vibrionaceae	Vibrio
Otu00848	Bacteria	Proteobacteria	Alphaproteobacteria	unclassified	unclassified	unclassified
Otu00849	Bacteria	Proteobacteria	Alphaproteobacteria	Rhodobacterales	Rhodobacteraceae	unclassified
Otu00850	Bacteria	Proteobacteria	Alphaproteobacteria	unclassified	unclassified	unclassified
Otu00851	Bacteria	Proteobacteria	Gammaproteobacteria	unclassified	unclassified	unclassified
Otu00852	Bacteria	Proteobacteria	Gammaproteobacteria	unclassified	unclassified	unclassified
Otu00853	Bacteria	Proteobacteria	Gammaproteobacteria	Alteromonadales	Alteromonadaceae	unclassified
Otu00854	Bacteria	Proteobacteria	Gammaproteobacteria	unclassified	unclassified	unclassified
Otu00855	Bacteria	Proteobacteria	Gammaproteobacteria	unclassified	unclassified	unclassified
Otu00856	Bacteria	Bacteroidetes	[Rhodothermi]	[Rhodothermales]	[Balneolaceae]	Balneola
Otu00857	Bacteria	Proteobacteria	Alphaproteobacteria	Rhodobacterales	Hyphomonadaceae	unclassified
Otu00858	Bacteria	Proteobacteria	Alphaproteobacteria	Rhodospirillales	Acetobacteraceae	Roseomonas
Otu00859	Bacteria	Bacteroidetes	unclassified	unclassified	unclassified	unclassified
Otu00860	Bacteria	Proteobacteria	unclassified	unclassified	unclassified	unclassified
Otu00861	Bacteria	Proteobacteria	Alphaproteobacteria	unclassified	unclassified	unclassified
Otu00862	Bacteria	Proteobacteria	unclassified	unclassified	unclassified	unclassified
Otu00863	Bacteria	Proteobacteria	unclassified	unclassified	unclassified	unclassified
Otu00864	Bacteria	Proteobacteria	Alphaproteobacteria	Rhodobacterales	Rhodobacteraceae	unclassified
Otu00865	Bacteria	Proteobacteria	Deltaproteobacteria	unclassified	unclassified	unclassified
Otu00866	Bacteria	Proteobacteria	Alphaproteobacteria	unclassified	unclassified	unclassified
Otu00867	Bacteria	Cyanobacteria	4C0d-2	MLE1-12	unclassified	unclassified
Otu00868	Bacteria	Bacteroidetes	Flavobacteriia	Flavobacteriales	Cryomorphaceae	unclassified
Otu00869	Bacteria	Proteobacteria	unclassified	unclassified	unclassified	unclassified
Otu00870	Bacteria	Proteobacteria	Gammaproteobacteria	Enterobacteriales	Enterobacteriaceae	Yersinia
Otu00871	Bacteria	Proteobacteria	unclassified	unclassified	unclassified	unclassified
Otu00872	Bacteria	Bacteroidetes	Flavobacteriia	Flavobacteriales	Flavobacteriaceae	Winogradskyella
Otu00873	Bacteria	Proteobacteria	Alphaproteobacteria	Rhodobacterales	Rhodobacteraceae	Antarctobacter
Otu00874	Bacteria	unclassified	unclassified	unclassified	unclassified	unclassified
Otu00875	Bacteria	Proteobacteria	Alphaproteobacteria	Kiloniellales	Kiloniellaceae	unclassified
Otu00876	Bacteria	Tenericutes	Mollicutes	Mycoplasmatales	Mycoplasmataceae	Mycoplasma
Otu00877	Bacteria	Proteobacteria	Gammaproteobacteria	unclassified	unclassified	unclassified
Otu00878	Bacteria	Proteobacteria	Alphaproteobacteria	Rhodobacterales	Rhodobacteraceae	unclassified
Otu00879	Bacteria	Proteobacteria	Deltaproteobacteria	Bdellovibrionales	Bacteriovoracaceae	unclassified
Otu00880	Bacteria	Proteobacteria	Alphaproteobacteria	Rhodobacterales	Rhodobacteraceae	Ruegeria
Otu00881	Bacteria	Proteobacteria	Alphaproteobacteria	Rhodospirillales	Rhodospirillaceae	Inquilinus
Otu00882	Bacteria	Proteobacteria	Gammaproteobacteria	Enterobacteriales	Enterobacteriaceae	Rahnella
Otu00883	Bacteria	Proteobacteria	Alphaproteobacteria	Rhodobacterales	Rhodobacteraceae	unclassified
Otu00884	Bacteria	Proteobacteria	Alphaproteobacteria	Rhodobacterales	Rhodobacteraceae	unclassified
Otu00885	Bacteria	Proteobacteria	Alphaproteobacteria	Rhodospirillales	Rhodospirillaceae	unclassified
Otu00886	Bacteria	Proteobacteria	Alphaproteobacteria	unclassified	unclassified	unclassified
Otu00887	Bacteria	Proteobacteria	Alphaproteobacteria	Rickettsiales	Pelagibacteraceae	unclassified
Otu00888	Bacteria	Proteobacteria	Alphaproteobacteria	Rhodobacterales	Rhodobacteraceae	unclassified
Otu00889	Bacteria	Proteobacteria	unclassified	unclassified	unclassified	unclassified
Otu00890	Bacteria	Proteobacteria	Alphaproteobacteria	Kiloniellales	Kiloniellaceae	Thalassospira
Otu00891	Bacteria	Proteobacteria	Alphaproteobacteria	Rhodobacterales	Rhodobacteraceae	unclassified
Otu00892	Bacteria	Proteobacteria	Gammaproteobacteria	unclassified	unclassified	unclassified
Otu00893	Bacteria	Bacteroidetes	Flavobacteriia	Flavobacteriales	unclassified	unclassified
Otu00894	Bacteria	Proteobacteria	Gammaproteobacteria	Vibrionales	unclassified	unclassified
Otu00895	Bacteria	Proteobacteria	unclassified	unclassified	unclassified	unclassified
Otu00896	Bacteria	Proteobacteria	Alphaproteobacteria	Rhodobacterales	Rhodobacteraceae	Oceanicola
Otu00897	Bacteria	Proteobacteria	Gammaproteobacteria	unclassified	unclassified	unclassified
Otu00898	Bacteria	Proteobacteria	Alphaproteobacteria	Rhodobacterales	Rhodobacteraceae	Marivita
Otu00899	Bacteria	Bacteroidetes	Flavobacteriia	Flavobacteriales	unclassified	unclassified
Otu00900	Bacteria	Verrucomicrobia	Opitutae	[Cerasicoccales]	[Cerasicoccaceae]	Cerasicoccus
Otu00901	Bacteria	Proteobacteria	Alphaproteobacteria	Rickettsiales	Pelagibacteraceae	unclassified
Otu00902	Bacteria	Firmicutes	Bacilli	Bacillales	Planococcaceae	unclassified
Otu00903	Bacteria	Proteobacteria	Gammaproteobacteria	unclassified	unclassified	unclassified
Otu00904	Bacteria	Proteobacteria	Gammaproteobacteria	unclassified	unclassified	unclassified
Otu00905	Bacteria	Bacteroidetes	Flavobacteriia	Flavobacteriales	Flavobacteriaceae	unclassified
Otu00906	Bacteria	Firmicutes	Bacilli	Bacillales	[Exiguobacteraceae]	Exiguobacterium
Otu00907	Bacteria	Proteobacteria	Gammaproteobacteria	unclassified	unclassified	unclassified
Otu00908	Bacteria	unclassified	unclassified	unclassified	unclassified	unclassified
Otu00909	Bacteria	Proteobacteria	Alphaproteobacteria	Rhizobiales	unclassified	unclassified
Otu00910	Bacteria	Proteobacteria	Alphaproteobacteria	Rickettsiales	Pelagibacteraceae	unclassified
Otu00911	Bacteria	Bacteroidetes	unclassified	unclassified	unclassified	unclassified
Otu00912	Bacteria	Proteobacteria	Gammaproteobacteria	HTCC2188	HTCC2089	unclassified
Otu00913	Bacteria	Proteobacteria	unclassified	unclassified	unclassified	unclassified
Otu00914	Bacteria	Proteobacteria	Deltaproteobacteria	unclassified	unclassified	unclassified
Otu00915	Bacteria	Bacteroidetes	Flavobacteriia	Flavobacteriales	Flavobacteriaceae	Flavobacterium
Otu00916	Bacteria	Proteobacteria	Gammaproteobacteria	Alteromonadales	Alteromonadaceae	unclassified
Otu00917	Bacteria	Proteobacteria	Gammaproteobacteria	Oceanospirillales	unclassified	unclassified
Otu00918	Bacteria	Proteobacteria	Gammaproteobacteria	Thiotrichales	Piscirickettsiaceae	unclassified
Otu00919	Bacteria	Proteobacteria	Gammaproteobacteria	Oceanospirillales	Oceanospirillaceae	Neptuniibacter
Otu00920	Bacteria	Proteobacteria	Gammaproteobacteria	unclassified	unclassified	unclassified
Otu00921	Bacteria	Proteobacteria	Gammaproteobacteria	Alteromonadales	Alteromonadaceae	unclassified
Otu00922	Bacteria	Proteobacteria	unclassified	unclassified	unclassified	unclassified
Otu00923	Bacteria	Proteobacteria	Gammaproteobacteria	Alteromonadales	Idiomarinaceae	Idiomarina
Otu00924	Bacteria	Proteobacteria	unclassified	unclassified	unclassified	unclassified
Otu00925	Bacteria	Proteobacteria	Alphaproteobacteria	unclassified	unclassified	unclassified
Otu00926	Bacteria	Proteobacteria	unclassified	unclassified	unclassified	unclassified
Otu00927	Bacteria	Proteobacteria	Gammaproteobacteria	Alteromonadales	Alteromonadaceae	Alteromonas
Otu00928	Bacteria	Proteobacteria	Alphaproteobacteria	unclassified	unclassified	unclassified
Otu00929	Bacteria	Proteobacteria	Alphaproteobacteria	unclassified	unclassified	unclassified
Otu00930	Bacteria	Proteobacteria	Gammaproteobacteria	Alteromonadales	OM60	unclassified
Otu00931	Bacteria	Proteobacteria	Gammaproteobacteria	Oceanospirillales	unclassified	unclassified
Otu00932	Bacteria	Proteobacteria	Deltaproteobacteria	unclassified	unclassified	unclassified
Otu00933	Bacteria	Proteobacteria	Gammaproteobacteria	Alteromonadales	Alteromonadaceae	Alteromonas
Otu00934	Bacteria	Proteobacteria	Gammaproteobacteria	Chromatiales	unclassified	unclassified
Otu00935	Bacteria	Bacteroidetes	Flavobacteriia	Flavobacteriales	Flavobacteriaceae	unclassified
Otu00936	Bacteria	Proteobacteria	Alphaproteobacteria	Rhodobacterales	Rhodobacteraceae	Octadecabacter
Otu00937	Bacteria	Proteobacteria	Alphaproteobacteria	Rhodobacterales	Rhodobacteraceae	Paracoccus
Otu00938	Bacteria	Proteobacteria	Gammaproteobacteria	Alteromonadales	OM60	unclassified
Otu00939	Bacteria	Proteobacteria	Alphaproteobacteria	Rhodobacterales	Rhodobacteraceae	unclassified
Otu00940	Bacteria	Proteobacteria	Gammaproteobacteria	Vibrionales	Vibrionaceae	Vibrio
Otu00941	Bacteria	Proteobacteria	Alphaproteobacteria	Rhodobacterales	Rhodobacteraceae	unclassified
Otu00942	Bacteria	Proteobacteria	Alphaproteobacteria	Rhodobacterales	Rhodobacteraceae	unclassified
Otu00943	Bacteria	Proteobacteria	Gammaproteobacteria	Pseudomonadales	Moraxellaceae	Acinetobacter
Otu00944	Bacteria	Proteobacteria	Gammaproteobacteria	unclassified	unclassified	unclassified
Otu00945	Bacteria	Proteobacteria	Gammaproteobacteria	Oceanospirillales	Oceanospirillaceae	Neptuniibacter
Otu00946	Bacteria	Bacteroidetes	Bacteroidia	Bacteroidales	Porphyromonadaceae	Porphyromonas
Otu00947	Bacteria	unclassified	unclassified	unclassified	unclassified	unclassified
Otu00948	Bacteria	Proteobacteria	Alphaproteobacteria	Rhodobacterales	Rhodobacteraceae	Loktanella
Otu00949	Bacteria	Proteobacteria	Gammaproteobacteria	unclassified	unclassified	unclassified
Otu00950	Bacteria	Proteobacteria	Deltaproteobacteria	NB1-j	JTB38	unclassified
Otu00951	Bacteria	Proteobacteria	Gammaproteobacteria	unclassified	unclassified	unclassified
Otu00952	Bacteria	Proteobacteria	Alphaproteobacteria	unclassified	unclassified	unclassified
Otu00953	Bacteria	Proteobacteria	Deltaproteobacteria	PB19	unclassified	unclassified
Otu00954	Bacteria	Cyanobacteria	4C0d-2	MLE1-12	unclassified	unclassified
Otu00955	Bacteria	Proteobacteria	Alphaproteobacteria	unclassified	unclassified	unclassified
Otu00956	Bacteria	Proteobacteria	Gammaproteobacteria	Alteromonadales	Alteromonadaceae	Candidatus_Endobugula
Otu00957	Bacteria	Proteobacteria	Alphaproteobacteria	Rhodospirillales	Rhodospirillaceae	Reyranella
Otu00958	Bacteria	Bacteroidetes	[Rhodothermi]	[Rhodothermales]	[Balneolaceae]	KSA1
Otu00959	Bacteria	Cyanobacteria	Synechococcophycideae	Synechococcales	Synechococcaceae	unclassified
Otu00960	Bacteria	Bacteroidetes	Bacteroidia	Bacteroidales	Prevotellaceae	Prevotella
Otu00961	Bacteria	Spirochaetes	[Leptospirae]	[Leptospirales]	Leptospiraceae	Leptonema
Otu00962	Bacteria	Bacteroidetes	Flavobacteriia	Flavobacteriales	Flavobacteriaceae	unclassified
Otu00963	Bacteria	Proteobacteria	Gammaproteobacteria	Alteromonadales	unclassified	unclassified
Otu00964	Bacteria	Proteobacteria	Alphaproteobacteria	Sphingomonadales	Sphingomonadaceae	unclassified
Otu00965	Bacteria	Proteobacteria	Gammaproteobacteria	Alteromonadales	OM60	unclassified
Otu00966	Bacteria	Proteobacteria	Gammaproteobacteria	Vibrionales	Vibrionaceae	Vibrio
Otu00967	Bacteria	Proteobacteria	Alphaproteobacteria	Rhodospirillales	Rhodospirillaceae	unclassified
Otu00968	Bacteria	Proteobacteria	Gammaproteobacteria	Vibrionales	Vibrionaceae	Vibrio
Otu00969	Bacteria	Proteobacteria	Alphaproteobacteria	Rhizobiales	Hyphomicrobiaceae	Pedomicrobium
Otu00970	Bacteria	Proteobacteria	Gammaproteobacteria	unclassified	unclassified	unclassified
Otu00971	Bacteria	Bacteroidetes	Flavobacteriia	Flavobacteriales	Flavobacteriaceae	unclassified
Otu00972	Bacteria	Proteobacteria	Gammaproteobacteria	Alteromonadales	Alteromonadaceae	Alteromonas
Otu00973	Bacteria	Proteobacteria	Alphaproteobacteria	unclassified	unclassified	unclassified
Otu00974	Bacteria	Bacteroidetes	Cytophagia	Cytophagales	unclassified	unclassified
Otu00975	Bacteria	unclassified	unclassified	unclassified	unclassified	unclassified
Otu00976	Bacteria	Proteobacteria	Gammaproteobacteria	unclassified	unclassified	unclassified
Otu00977	Bacteria	Bacteroidetes	Cytophagia	Cytophagales	Flammeovirgaceae	unclassified
Otu00978	Bacteria	Proteobacteria	Alphaproteobacteria	Rhodobacterales	Rhodobacteraceae	unclassified
Otu00979	Bacteria	Proteobacteria	Gammaproteobacteria	Oceanospirillales	Oceanospirillaceae	Marinomonas
Otu00980	Bacteria	Proteobacteria	Alphaproteobacteria	Rhodobacterales	Rhodobacteraceae	unclassified
Otu00981	Bacteria	Proteobacteria	Gammaproteobacteria	Alteromonadales	Alteromonadaceae	HTCC2207
Otu00982	Bacteria	Bacteroidetes	[Saprospirae]	[Saprospirales]	Chitinophagaceae	Sediminibacterium
Otu00983	Bacteria	Proteobacteria	Gammaproteobacteria	Oceanospirillales	Oceanospirillaceae	Marinomonas
Otu00984	Bacteria	Bacteroidetes	unclassified	unclassified	unclassified	unclassified
Otu00985	Bacteria	Firmicutes	Bacilli	Gemellales	Gemellaceae	Gemella
Otu00986	Bacteria	Proteobacteria	Gammaproteobacteria	Enterobacteriales	Enterobacteriaceae	unclassified
Otu00987	Bacteria	Proteobacteria	Gammaproteobacteria	unclassified	unclassified	unclassified
Otu00988	Bacteria	Proteobacteria	Gammaproteobacteria	Vibrionales	Vibrionaceae	Vibrio
Otu00989	Bacteria	Proteobacteria	Gammaproteobacteria	unclassified	unclassified	unclassified
Otu00990	Bacteria	Proteobacteria	Deltaproteobacteria	Spirobacillales	unclassified	unclassified
Otu00991	Bacteria	Proteobacteria	Alphaproteobacteria	Rhodobacterales	Rhodobacteraceae	unclassified
Otu00992	Bacteria	Proteobacteria	Gammaproteobacteria	Alteromonadales	Alteromonadaceae	Alteromonas
Otu00993	Bacteria	Proteobacteria	Deltaproteobacteria	Bdellovibrionales	Bacteriovoracaceae	Bacteriovorax
Otu00994	Bacteria	Proteobacteria	Gammaproteobacteria	Oceanospirillales	SUP05	unclassified
Otu00995	Bacteria	Fusobacteria	Fusobacteriia	Fusobacteriales	Leptotrichiaceae	Sneathia
Otu00996	Bacteria	Bacteroidetes	Flavobacteriia	Flavobacteriales	Cryomorphaceae	Fluviicola
Otu00997	Bacteria	Bacteroidetes	unclassified	unclassified	unclassified	unclassified
Otu00998	Bacteria	Proteobacteria	Alphaproteobacteria	Sphingomonadales	Sphingomonadaceae	Novosphingobium
Otu00999	Bacteria	Proteobacteria	Gammaproteobacteria	Oceanospirillales	Alcanivoracaceae	Alcanivorax
Otu01000	Bacteria	Proteobacteria	Alphaproteobacteria	Kiloniellales	Kiloniellaceae	Thalassospira
Otu01001	Bacteria	Actinobacteria	Acidimicrobiia	Acidimicrobiales	OCS155	unclassified
Otu01002	Bacteria	Proteobacteria	Gammaproteobacteria	unclassified	unclassified	unclassified
Otu01003	Bacteria	Proteobacteria	Alphaproteobacteria	Kiloniellales	Kiloniellaceae	Thalassospira
Otu01004	Bacteria	Proteobacteria	Alphaproteobacteria	BD7-3	unclassified	unclassified
Otu01005	Bacteria	GN02	BD1-5	unclassified	unclassified	unclassified
Otu01006	Bacteria	Proteobacteria	Alphaproteobacteria	unclassified	unclassified	unclassified
Otu01007	Bacteria	Proteobacteria	Alphaproteobacteria	Sphingomonadales	Sphingomonadaceae	unclassified
Otu01008	Bacteria	Proteobacteria	Deltaproteobacteria	unclassified	unclassified	unclassified
Otu01009	Bacteria	Proteobacteria	Gammaproteobacteria	Enterobacteriales	Enterobacteriaceae	unclassified
Otu01010	Bacteria	Proteobacteria	unclassified	unclassified	unclassified	unclassified
Otu01011	Bacteria	Bacteroidetes	Flavobacteriia	Flavobacteriales	Flavobacteriaceae	unclassified
Otu01012	Bacteria	Proteobacteria	unclassified	unclassified	unclassified	unclassified
Otu01013	Bacteria	Proteobacteria	unclassified	unclassified	unclassified	unclassified
Otu01014	Bacteria	Proteobacteria	Alphaproteobacteria	Rhodobacterales	Rhodobacteraceae	unclassified
Otu01015	Bacteria	Proteobacteria	Gammaproteobacteria	Pseudomonadales	Pseudomonadaceae	Pseudomonas
Otu01016	Bacteria	Proteobacteria	Epsilonproteobacteria	Campylobacterales	Campylobacteraceae	Arcobacter
Otu01017	Bacteria	Proteobacteria	Gammaproteobacteria	Alteromonadales	Alteromonadaceae	Marinobacter
Otu01018	Bacteria	unclassified	unclassified	unclassified	unclassified	unclassified
Otu01019	Bacteria	Proteobacteria	Alphaproteobacteria	Rickettsiales	Rickettsiaceae	unclassified
Otu01020	Bacteria	Proteobacteria	Alphaproteobacteria	Rhizobiales	Phyllobacteriaceae	Ahrensia
Otu01021	Bacteria	Proteobacteria	Alphaproteobacteria	Rickettsiales	Pelagibacteraceae	unclassified
Otu01022	Bacteria	Proteobacteria	Gammaproteobacteria	unclassified	unclassified	unclassified
Otu01023	Bacteria	Proteobacteria	Alphaproteobacteria	Rhodobacterales	Rhodobacteraceae	unclassified
Otu01024	Bacteria	Proteobacteria	Alphaproteobacteria	unclassified	unclassified	unclassified
Otu01025	Bacteria	Bacteroidetes	Flavobacteriia	Flavobacteriales	Flavobacteriaceae	Krokinobacter
Otu01026	Bacteria	Proteobacteria	Gammaproteobacteria	Vibrionales	Vibrionaceae	Vibrio
Otu01027	Bacteria	Proteobacteria	Gammaproteobacteria	Vibrionales	Vibrionaceae	Vibrio
Otu01028	Bacteria	Proteobacteria	Gammaproteobacteria	unclassified	unclassified	unclassified
Otu01029	Bacteria	Proteobacteria	Gammaproteobacteria	Oceanospirillales	Oleiphilaceae	unclassified
Otu01030	Bacteria	Proteobacteria	Alphaproteobacteria	unclassified	unclassified	unclassified
Otu01031	Bacteria	Proteobacteria	Gammaproteobacteria	unclassified	unclassified	unclassified
Otu01032	Bacteria	Bacteroidetes	Cytophagia	Cytophagales	unclassified	unclassified
Otu01033	Bacteria	Proteobacteria	Gammaproteobacteria	Oceanospirillales	Oceanospirillaceae	unclassified
Otu01034	Bacteria	Proteobacteria	Deltaproteobacteria	unclassified	unclassified	unclassified
Otu01035	Bacteria	Proteobacteria	Deltaproteobacteria	Bdellovibrionales	Bdellovibrionaceae	Bdellovibrio
Otu01036	Bacteria	Proteobacteria	Gammaproteobacteria	Enterobacteriales	Enterobacteriaceae	unclassified
Otu01037	Bacteria	Proteobacteria	unclassified	unclassified	unclassified	unclassified
Otu01038	Bacteria	Proteobacteria	Gammaproteobacteria	Alteromonadales	Alteromonadaceae	Glaciecola
Otu01039	Bacteria	Proteobacteria	Gammaproteobacteria	Alteromonadales	unclassified	unclassified
Otu01040	Bacteria	Proteobacteria	unclassified	unclassified	unclassified	unclassified
Otu01041	Bacteria	Proteobacteria	Gammaproteobacteria	unclassified	unclassified	unclassified
Otu01042	Bacteria	Proteobacteria	unclassified	unclassified	unclassified	unclassified
Otu01043	Bacteria	Proteobacteria	Gammaproteobacteria	Alteromonadales	unclassified	unclassified
Otu01044	Bacteria	Proteobacteria	unclassified	unclassified	unclassified	unclassified
Otu01045	Bacteria	Proteobacteria	Deltaproteobacteria	unclassified	unclassified	unclassified
Otu01046	Bacteria	Proteobacteria	Gammaproteobacteria	Vibrionales	Vibrionaceae	Vibrio
Otu01047	Bacteria	Proteobacteria	Gammaproteobacteria	Vibrionales	Vibrionaceae	Vibrio
Otu01048	Bacteria	Proteobacteria	Gammaproteobacteria	unclassified	unclassified	unclassified
Otu01049	Bacteria	Proteobacteria	Gammaproteobacteria	Vibrionales	Pseudoalteromonadaceae	Pseudoalteromonas
Otu01050	Bacteria	Proteobacteria	Gammaproteobacteria	Vibrionales	Vibrionaceae	Vibrio
Otu01051	Bacteria	Proteobacteria	Gammaproteobacteria	unclassified	unclassified	unclassified
Otu01052	Bacteria	Proteobacteria	Betaproteobacteria	Neisseriales	Neisseriaceae	unclassified
Otu01053	Bacteria	Proteobacteria	unclassified	unclassified	unclassified	unclassified
Otu01054	Bacteria	Proteobacteria	Alphaproteobacteria	unclassified	unclassified	unclassified
Otu01055	Bacteria	Proteobacteria	Gammaproteobacteria	Oceanospirillales	Oceanospirillaceae	Marinomonas
Otu01056	Bacteria	Proteobacteria	Alphaproteobacteria	Rickettsiales	Pelagibacteraceae	unclassified
Otu01057	Bacteria	Proteobacteria	Gammaproteobacteria	unclassified	unclassified	unclassified
Otu01058	Bacteria	unclassified	unclassified	unclassified	unclassified	unclassified
Otu01059	Bacteria	Proteobacteria	Alphaproteobacteria	unclassified	unclassified	unclassified
Otu01060	Bacteria	Proteobacteria	Alphaproteobacteria	unclassified	unclassified	unclassified
Otu01061	Bacteria	unclassified	unclassified	unclassified	unclassified	unclassified
Otu01062	Bacteria	Proteobacteria	Alphaproteobacteria	Rhodobacterales	Rhodobacteraceae	unclassified
Otu01063	Bacteria	Proteobacteria	Deltaproteobacteria	NB1-j	JTB38	unclassified
Otu01064	Bacteria	Bacteroidetes	Flavobacteriia	Flavobacteriales	Flavobacteriaceae	unclassified
Otu01065	Bacteria	Bacteroidetes	Flavobacteriia	Flavobacteriales	Flavobacteriaceae	unclassified
Otu01066	Bacteria	Proteobacteria	Alphaproteobacteria	Rhodobacterales	Rhodobacteraceae	unclassified
Otu01067	Bacteria	Proteobacteria	Alphaproteobacteria	Rhodobacterales	Rhodobacteraceae	unclassified
Otu01068	Bacteria	Proteobacteria	Alphaproteobacteria	Rhodobacterales	Rhodobacteraceae	unclassified
Otu01069	Bacteria	Proteobacteria	Alphaproteobacteria	Rhodobacterales	Rhodobacteraceae	unclassified
Otu01070	Bacteria	Proteobacteria	Alphaproteobacteria	Rhodobacterales	Rhodobacteraceae	unclassified
Otu01071	Bacteria	Proteobacteria	Alphaproteobacteria	Rhodobacterales	Rhodobacteraceae	unclassified
Otu01072	Bacteria	Proteobacteria	Alphaproteobacteria	Rhodobacterales	Rhodobacteraceae	unclassified
Otu01073	Bacteria	Proteobacteria	Alphaproteobacteria	Rhodobacterales	Rhodobacteraceae	unclassified
Otu01074	Bacteria	Proteobacteria	Alphaproteobacteria	Rhodobacterales	Rhodobacteraceae	unclassified
Otu01075	Bacteria	Proteobacteria	Deltaproteobacteria	Spirobacillales	unclassified	unclassified
Otu01076	Bacteria	Proteobacteria	Alphaproteobacteria	Rhodobacterales	Rhodobacteraceae	unclassified
Otu01077	Bacteria	Bacteroidetes	unclassified	unclassified	unclassified	unclassified
Otu01078	Bacteria	Proteobacteria	Alphaproteobacteria	Rhodobacterales	Rhodobacteraceae	unclassified
Otu01079	Bacteria	Chloroflexi	Anaerolineae	Caldilineales	Caldilineaceae	unclassified
Otu01080	Bacteria	Proteobacteria	Alphaproteobacteria	Rhodobacterales	Rhodobacteraceae	unclassified
Otu01081	Bacteria	Proteobacteria	Alphaproteobacteria	Rhodobacterales	Rhodobacteraceae	unclassified
Otu01082	Bacteria	Proteobacteria	Alphaproteobacteria	Rhodobacterales	Rhodobacteraceae	Ruegeria
Otu01083	Bacteria	Proteobacteria	Gammaproteobacteria	Vibrionales	Vibrionaceae	Vibrio
Otu01084	Bacteria	Proteobacteria	Deltaproteobacteria	Bdellovibrionales	Bdellovibrionaceae	Bdellovibrio
Otu01085	Bacteria	Proteobacteria	Deltaproteobacteria	Bdellovibrionales	Bdellovibrionaceae	Bdellovibrio
Otu01086	Bacteria	Proteobacteria	unclassified	unclassified	unclassified	unclassified
Otu01087	Bacteria	Proteobacteria	Gammaproteobacteria	Oceanospirillales	Oceanospirillaceae	unclassified
Otu01088	Bacteria	Bacteroidetes	Flavobacteriia	Flavobacteriales	Cryomorphaceae	unclassified
Otu01089	Bacteria	Cyanobacteria	Synechococcophycideae	Synechococcales	Synechococcaceae	unclassified
Otu01090	Bacteria	Proteobacteria	Gammaproteobacteria	Oceanospirillales	Oleiphilaceae	unclassified
Otu01091	Bacteria	Proteobacteria	Alphaproteobacteria	Rhodobacterales	Rhodobacteraceae	Paracoccus
Otu01092	Bacteria	Proteobacteria	Gammaproteobacteria	unclassified	unclassified	unclassified
Otu01093	Bacteria	Proteobacteria	Alphaproteobacteria	Rhodospirillales	Rhodospirillaceae	unclassified
Otu01094	Bacteria	Cyanobacteria	4C0d-2	SM2F09	unclassified	unclassified
Otu01095	Bacteria	Bacteroidetes	Flavobacteriia	Flavobacteriales	Flavobacteriaceae	unclassified
Otu01096	Bacteria	Cyanobacteria	4C0d-2	MLE1-12	unclassified	unclassified
Otu01097	Bacteria	Proteobacteria	Alphaproteobacteria	unclassified	unclassified	unclassified
Otu01098	Bacteria	Proteobacteria	Alphaproteobacteria	Kiloniellales	Kiloniellaceae	Thalassospira
Otu01099	Bacteria	Proteobacteria	unclassified	unclassified	unclassified	unclassified
Otu01100	Bacteria	Proteobacteria	Alphaproteobacteria	Rhodospirillales	unclassified	unclassified
Otu01101	Bacteria	Proteobacteria	Alphaproteobacteria	Rhodobacterales	Rhodobacteraceae	unclassified
Otu01102	Bacteria	Proteobacteria	Alphaproteobacteria	Rhodobacterales	Rhodobacteraceae	unclassified
Otu01103	Bacteria	Bacteroidetes	unclassified	unclassified	unclassified	unclassified
Otu01104	Bacteria	Proteobacteria	Gammaproteobacteria	unclassified	unclassified	unclassified
Otu01105	Bacteria	Chlorobi	OPB56	unclassified	unclassified	unclassified
Otu01106	Bacteria	Bacteroidetes	Cytophagia	Cytophagales	[Amoebophilaceae]	SC3-56
Otu01107	Bacteria	Proteobacteria	Gammaproteobacteria	unclassified	unclassified	unclassified
Otu01108	Bacteria	Proteobacteria	Gammaproteobacteria	unclassified	unclassified	unclassified
Otu01109	Bacteria	Actinobacteria	Actinobacteria	Actinomycetales	Micrococcaceae	unclassified
Otu01110	Bacteria	Proteobacteria	Gammaproteobacteria	Legionellales	Legionellaceae	Legionella
Otu01111	Bacteria	Proteobacteria	Gammaproteobacteria	Vibrionales	Pseudoalteromonadaceae	Pseudoalteromonas
Otu01112	Bacteria	Proteobacteria	Alphaproteobacteria	Rhodobacterales	Rhodobacteraceae	unclassified
Otu01113	Bacteria	Proteobacteria	Gammaproteobacteria	Enterobacteriales	Enterobacteriaceae	unclassified
Otu01114	Bacteria	Proteobacteria	Deltaproteobacteria	Bdellovibrionales	Bdellovibrionaceae	Bdellovibrio
Otu01115	Bacteria	Proteobacteria	Alphaproteobacteria	Rhodobacterales	Rhodobacteraceae	Paracoccus
Otu01116	Bacteria	Proteobacteria	Deltaproteobacteria	Bdellovibrionales	Bdellovibrionaceae	Bdellovibrio
Otu01117	Bacteria	Proteobacteria	Gammaproteobacteria	unclassified	unclassified	unclassified
Otu01118	Bacteria	Bacteroidetes	Flavobacteriia	Flavobacteriales	Flavobacteriaceae	Capnocytophaga
Otu01119	Bacteria	Bacteroidetes	Flavobacteriia	Flavobacteriales	Flavobacteriaceae	unclassified
Otu01120	Bacteria	Proteobacteria	Gammaproteobacteria	Vibrionales	Pseudoalteromonadaceae	Pseudoalteromonas
Otu01121	Bacteria	Proteobacteria	Gammaproteobacteria	unclassified	unclassified	unclassified
Otu01122	Bacteria	Cyanobacteria	4C0d-2	MLE1-12	unclassified	unclassified
Otu01123	Bacteria	Proteobacteria	Alphaproteobacteria	Rhodobacterales	Rhodobacteraceae	Paracoccus
Otu01124	Bacteria	Proteobacteria	Betaproteobacteria	Neisseriales	Neisseriaceae	Neisseria
Otu01125	Bacteria	Firmicutes	Bacilli	Lactobacillales	Streptococcaceae	Streptococcus
Otu01126	Bacteria	Proteobacteria	unclassified	unclassified	unclassified	unclassified
Otu01127	Bacteria	Proteobacteria	Gammaproteobacteria	Alteromonadales	Alteromonadaceae	Glaciecola
Otu01128	Bacteria	Proteobacteria	Alphaproteobacteria	unclassified	unclassified	unclassified
Otu01129	Bacteria	Firmicutes	Bacilli	Lactobacillales	Carnobacteriaceae	Desemzia
Otu01130	Bacteria	Bacteroidetes	Flavobacteriia	Flavobacteriales	Flavobacteriaceae	Flavobacterium
Otu01131	Bacteria	Bacteroidetes	Flavobacteriia	Flavobacteriales	Cryomorphaceae	unclassified
Otu01132	Bacteria	Proteobacteria	Deltaproteobacteria	Myxococcales	Cystobacterineae	unclassified
Otu01133	Bacteria	Bacteroidetes	Flavobacteriia	Flavobacteriales	Flavobacteriaceae	Lutibacter
Otu01134	Bacteria	Proteobacteria	Gammaproteobacteria	Vibrionales	Vibrionaceae	Vibrio
Otu01135	Bacteria	Proteobacteria	Gammaproteobacteria	Vibrionales	Vibrionaceae	Vibrio
Otu01136	Bacteria	Bacteroidetes	unclassified	unclassified	unclassified	unclassified
Otu01137	Bacteria	Cyanobacteria	Synechococcophycideae	Synechococcales	Synechococcaceae	unclassified
Otu01138	Bacteria	Proteobacteria	Deltaproteobacteria	NB1-j	JTB38	unclassified
Otu01139	Bacteria	Bacteroidetes	Flavobacteriia	Flavobacteriales	Flavobacteriaceae	Maribacter
Otu01140	Bacteria	Proteobacteria	Betaproteobacteria	Methylophilales	Methylophilaceae	Methylotenera
Otu01141	Bacteria	Bacteroidetes	Bacteroidia	Bacteroidales	Porphyromonadaceae	Porphyromonas
Otu01142	Bacteria	Proteobacteria	Gammaproteobacteria	unclassified	unclassified	unclassified
Otu01143	Bacteria	Proteobacteria	unclassified	unclassified	unclassified	unclassified
Otu01144	Bacteria	Proteobacteria	Gammaproteobacteria	Alteromonadales	Alteromonadaceae	nsmpVI18
Otu01145	Bacteria	Proteobacteria	Deltaproteobacteria	NB1-j	JTB38	unclassified
Otu01146	Bacteria	Bacteroidetes	Flavobacteriia	Flavobacteriales	Flavobacteriaceae	unclassified
Otu01147	Bacteria	Proteobacteria	Gammaproteobacteria	unclassified	unclassified	unclassified
Otu01148	Bacteria	Proteobacteria	Gammaproteobacteria	Vibrionales	Vibrionaceae	Vibrio
Otu01149	Bacteria	Proteobacteria	Deltaproteobacteria	NB1-j	JTB38	unclassified
Otu01150	Bacteria	Proteobacteria	Alphaproteobacteria	Rhodobacterales	Rhodobacteraceae	unclassified
Otu01151	Bacteria	Proteobacteria	Gammaproteobacteria	Oceanospirillales	SUP05	unclassified
Otu01152	Bacteria	Proteobacteria	Gammaproteobacteria	Oceanospirillales	unclassified	unclassified
Otu01153	Bacteria	Proteobacteria	Alphaproteobacteria	Rhizobiales	Rhizobiaceae	Agrobacterium
Otu01154	Bacteria	Proteobacteria	Gammaproteobacteria	Vibrionales	Pseudoalteromonadaceae	Pseudoalteromonas
Otu01155	Bacteria	Proteobacteria	Alphaproteobacteria	unclassified	unclassified	unclassified
Otu01156	Bacteria	Actinobacteria	Actinobacteria	Actinomycetales	Microbacteriaceae	Yonghaparkia
Otu01157	Bacteria	Proteobacteria	Gammaproteobacteria	unclassified	unclassified	unclassified
Otu01158	Bacteria	Proteobacteria	Gammaproteobacteria	unclassified	unclassified	unclassified
Otu01159	Bacteria	Proteobacteria	Alphaproteobacteria	Rhodobacterales	Rhodobacteraceae	Ruegeria
Otu01160	Bacteria	Actinobacteria	Acidimicrobiia	Acidimicrobiales	C111	unclassified
Otu01161	Bacteria	Proteobacteria	Gammaproteobacteria	unclassified	unclassified	unclassified
Otu01162	Bacteria	Proteobacteria	Gammaproteobacteria	unclassified	unclassified	unclassified
Otu01163	Bacteria	Proteobacteria	Gammaproteobacteria	unclassified	unclassified	unclassified
Otu01164	Bacteria	Bacteroidetes	unclassified	unclassified	unclassified	unclassified
Otu01165	Bacteria	Proteobacteria	Gammaproteobacteria	Alteromonadales	Alteromonadaceae	Glaciecola
Otu01166	Bacteria	Proteobacteria	Alphaproteobacteria	Rhodobacterales	Rhodobacteraceae	Ruegeria
Otu01167	Bacteria	Bacteroidetes	Cytophagia	Cytophagales	Flammeovirgaceae	unclassified
Otu01168	Bacteria	Proteobacteria	Alphaproteobacteria	Rickettsiales	Pelagibacteraceae	unclassified
Otu01169	Bacteria	Bacteroidetes	Cytophagia	Cytophagales	Flammeovirgaceae	Roseivirga
Otu01170	Bacteria	Proteobacteria	Deltaproteobacteria	Bdellovibrionales	Bdellovibrionaceae	Bdellovibrio
Otu01171	Bacteria	Actinobacteria	Actinobacteria	Actinomycetales	Microbacteriaceae	Candidatus_Aquiluna
Otu01172	Bacteria	Proteobacteria	Gammaproteobacteria	Legionellales	unclassified	unclassified
Otu01173	Bacteria	Bacteroidetes	unclassified	unclassified	unclassified	unclassified
Otu01174	Bacteria	Bacteroidetes	unclassified	unclassified	unclassified	unclassified
Otu01175	Bacteria	Actinobacteria	Actinobacteria	Actinomycetales	Corynebacteriaceae	Corynebacterium
Otu01176	Bacteria	Proteobacteria	Alphaproteobacteria	Rhodobacterales	Rhodobacteraceae	Ruegeria
Otu01177	Bacteria	Proteobacteria	Alphaproteobacteria	Rhodobacterales	Rhodobacteraceae	unclassified
Otu01178	Bacteria	Proteobacteria	Gammaproteobacteria	unclassified	unclassified	unclassified
Otu01179	Bacteria	Planctomycetes	OM190	CL500-15	unclassified	unclassified
Otu01180	Bacteria	Proteobacteria	Gammaproteobacteria	unclassified	unclassified	unclassified
Otu01181	Bacteria	Proteobacteria	Gammaproteobacteria	unclassified	unclassified	unclassified
Otu01182	Bacteria	Bacteroidetes	Flavobacteriia	Flavobacteriales	Cryomorphaceae	unclassified
Otu01183	Bacteria	Bacteroidetes	Flavobacteriia	Flavobacteriales	Flavobacteriaceae	Ulvibacter
Otu01184	Bacteria	Proteobacteria	unclassified	unclassified	unclassified	unclassified
Otu01185	Bacteria	Proteobacteria	unclassified	unclassified	unclassified	unclassified
Otu01186	Bacteria	Proteobacteria	Alphaproteobacteria	Rhodobacterales	Rhodobacteraceae	unclassified
Otu01187	Bacteria	Proteobacteria	Alphaproteobacteria	Caulobacterales	Caulobacteraceae	Brevundimonas
Otu01188	Bacteria	Proteobacteria	Gammaproteobacteria	unclassified	unclassified	unclassified
Otu01189	Bacteria	Proteobacteria	Deltaproteobacteria	Spirobacillales	unclassified	unclassified
Otu01190	Bacteria	Proteobacteria	Gammaproteobacteria	unclassified	unclassified	unclassified
Otu01191	Bacteria	Proteobacteria	unclassified	unclassified	unclassified	unclassified
Otu01192	Bacteria	Proteobacteria	Alphaproteobacteria	BD7-3	unclassified	unclassified
Otu01193	Bacteria	Proteobacteria	Alphaproteobacteria	unclassified	unclassified	unclassified
Otu01194	Bacteria	Proteobacteria	Gammaproteobacteria	unclassified	unclassified	unclassified
Otu01195	Bacteria	Bacteroidetes	Flavobacteriia	Flavobacteriales	Flavobacteriaceae	Tenacibaculum
Otu01196	Bacteria	Proteobacteria	Gammaproteobacteria	Legionellales	Francisellaceae	unclassified
Otu01197	Bacteria	Proteobacteria	unclassified	unclassified	unclassified	unclassified
Otu01198	Bacteria	Proteobacteria	unclassified	unclassified	unclassified	unclassified
Otu01199	Bacteria	Proteobacteria	Alphaproteobacteria	Sphingomonadales	Sphingomonadaceae	Sphingomonas
Otu01200	Bacteria	Proteobacteria	Alphaproteobacteria	unclassified	unclassified	unclassified
Otu01201	Bacteria	Proteobacteria	unclassified	unclassified	unclassified	unclassified
Otu01202	Bacteria	Bacteroidetes	Flavobacteriia	Flavobacteriales	Flavobacteriaceae	unclassified
Otu01203	Bacteria	Proteobacteria	Alphaproteobacteria	Rhodobacterales	Rhodobacteraceae	unclassified
Otu01204	Bacteria	Bacteroidetes	Flavobacteriia	Flavobacteriales	Flavobacteriaceae	unclassified
Otu01205	Bacteria	unclassified	unclassified	unclassified	unclassified	unclassified
Otu01206	Bacteria	Firmicutes	Bacilli	Lactobacillales	Streptococcaceae	Streptococcus
Otu01207	Bacteria	Proteobacteria	Alphaproteobacteria	Rhodobacterales	Rhodobacteraceae	unclassified
Otu01208	Bacteria	Proteobacteria	unclassified	unclassified	unclassified	unclassified
Otu01209	Bacteria	Proteobacteria	Alphaproteobacteria	Rhodobacterales	Rhodobacteraceae	Rhodobacter
Otu01210	Bacteria	Proteobacteria	Alphaproteobacteria	Rickettsiales	Pelagibacteraceae	unclassified
Otu01211	Bacteria	Bacteroidetes	Flavobacteriia	Flavobacteriales	Flavobacteriaceae	unclassified
Otu01212	Bacteria	Proteobacteria	Deltaproteobacteria	Bdellovibrionales	Bdellovibrionaceae	Bdellovibrio
Otu01213	Bacteria	Proteobacteria	Alphaproteobacteria	Rhodobacterales	Rhodobacteraceae	unclassified
Otu01214	Bacteria	Proteobacteria	Gammaproteobacteria	unclassified	unclassified	unclassified
Otu01215	Bacteria	Proteobacteria	Alphaproteobacteria	Rhodobacterales	Rhodobacteraceae	unclassified
Otu01216	Bacteria	Proteobacteria	Gammaproteobacteria	unclassified	unclassified	unclassified
Otu01217	Bacteria	Proteobacteria	Gammaproteobacteria	Alteromonadales	Alteromonadaceae	Alteromonas
Otu01218	Bacteria	Proteobacteria	Gammaproteobacteria	unclassified	unclassified	unclassified
Otu01219	Bacteria	Proteobacteria	unclassified	unclassified	unclassified	unclassified
Otu01220	Bacteria	Proteobacteria	Gammaproteobacteria	Alteromonadales	Alteromonadaceae	unclassified
Otu01221	Bacteria	Bacteroidetes	Flavobacteriia	Flavobacteriales	NS9	unclassified
Otu01222	Bacteria	Proteobacteria	unclassified	unclassified	unclassified	unclassified
Otu01223	Bacteria	Proteobacteria	unclassified	unclassified	unclassified	unclassified
Otu01224	Bacteria	unclassified	unclassified	unclassified	unclassified	unclassified
Otu01225	Bacteria	Cyanobacteria	unclassified	unclassified	unclassified	unclassified
Otu01226	Bacteria	Actinobacteria	Acidimicrobiia	Acidimicrobiales	C111	unclassified
Otu01227	Bacteria	Bacteroidetes	unclassified	unclassified	unclassified	unclassified
Otu01228	Bacteria	unclassified	unclassified	unclassified	unclassified	unclassified
Otu01229	Bacteria	Proteobacteria	Gammaproteobacteria	unclassified	unclassified	unclassified
Otu01230	Bacteria	Proteobacteria	Gammaproteobacteria	Alteromonadales	Alteromonadaceae	unclassified
Otu01231	Bacteria	Proteobacteria	Alphaproteobacteria	Rhodobacterales	Rhodobacteraceae	unclassified
Otu01232	Bacteria	Proteobacteria	Betaproteobacteria	Burkholderiales	Oxalobacteraceae	Ralstonia
Otu01233	Bacteria	Proteobacteria	Gammaproteobacteria	unclassified	unclassified	unclassified
Otu01234	Bacteria	Proteobacteria	Alphaproteobacteria	unclassified	unclassified	unclassified
Otu01235	Bacteria	Proteobacteria	Gammaproteobacteria	Alteromonadales	HTCC2188	HTCC
Otu01236	Bacteria	Proteobacteria	unclassified	unclassified	unclassified	unclassified
Otu01237	Bacteria	Proteobacteria	Gammaproteobacteria	unclassified	unclassified	unclassified
Otu01238	Bacteria	Proteobacteria	Alphaproteobacteria	Sphingomonadales	Sphingomonadaceae	Sphingobium
Otu01239	Bacteria	Firmicutes	Clostridia	Clostridiales	Veillonellaceae	Zymophilus
Otu01240	Bacteria	Firmicutes	Clostridia	Clostridiales	Ruminococcaceae	Ruminococcus
Otu01241	Bacteria	Cyanobacteria	unclassified	unclassified	unclassified	unclassified
Otu01242	Bacteria	Firmicutes	Clostridia	Clostridiales	Peptostreptococcaceae	unclassified
Otu01243	Bacteria	Proteobacteria	Alphaproteobacteria	Rhodobacterales	Rhodobacteraceae	Sulfitobacter
Otu01244	Bacteria	Bacteroidetes	Flavobacteriia	Flavobacteriales	Flavobacteriaceae	unclassified
Otu01245	Bacteria	Proteobacteria	Gammaproteobacteria	Alteromonadales	Alteromonadaceae	unclassified
Otu01246	Bacteria	Proteobacteria	Gammaproteobacteria	Alteromonadales	Colwelliaceae	Thalassomonas
Otu01247	Bacteria	Proteobacteria	Alphaproteobacteria	Rhodobacterales	Rhodobacteraceae	unclassified
Otu01248	Bacteria	Firmicutes	Bacilli	Lactobacillales	Enterococcaceae	Enterococcus
Otu01249	Bacteria	Bacteroidetes	Flavobacteriia	Flavobacteriales	Flavobacteriaceae	unclassified
Otu01250	Bacteria	Actinobacteria	Actinobacteria	Actinomycetales	Microbacteriaceae	unclassified
Otu01251	Bacteria	Proteobacteria	Gammaproteobacteria	unclassified	unclassified	unclassified
Otu01252	Bacteria	Proteobacteria	Gammaproteobacteria	Alteromonadales	Alteromonadaceae	Alteromonas
Otu01253	Bacteria	Cyanobacteria	4C0d-2	MLE1-12	unclassified	unclassified
Otu01254	Bacteria	Bacteroidetes	Flavobacteriia	Flavobacteriales	Flavobacteriaceae	unclassified
Otu01255	Bacteria	Proteobacteria	Deltaproteobacteria	unclassified	unclassified	unclassified
Otu01256	Bacteria	Proteobacteria	Gammaproteobacteria	Vibrionales	Pseudoalteromonadaceae	Pseudoalteromonas
Otu01257	Bacteria	Proteobacteria	Alphaproteobacteria	Rhodobacterales	Rhodobacteraceae	Octadecabacter
Otu01258	Bacteria	Bacteroidetes	Bacteroidia	Bacteroidales	Bacteroidaceae	Bacteroides
Otu01259	Bacteria	Proteobacteria	Gammaproteobacteria	Vibrionales	Vibrionaceae	Vibrio
Otu01260	Bacteria	Bacteroidetes	unclassified	unclassified	unclassified	unclassified
Otu01261	Bacteria	Cyanobacteria	unclassified	unclassified	unclassified	unclassified
Otu01262	Bacteria	Proteobacteria	Gammaproteobacteria	Vibrionales	Pseudoalteromonadaceae	Pseudoalteromonas
Otu01263	Bacteria	Bacteroidetes	Flavobacteriia	Flavobacteriales	Flavobacteriaceae	unclassified
Otu01264	Bacteria	Proteobacteria	Alphaproteobacteria	unclassified	unclassified	unclassified
Otu01265	Bacteria	Planctomycetes	unclassified	unclassified	unclassified	unclassified
Otu01266	Bacteria	Proteobacteria	Alphaproteobacteria	Rhodobacterales	Rhodobacteraceae	unclassified
Otu01267	Bacteria	Bacteroidetes	Flavobacteriia	Flavobacteriales	Flavobacteriaceae	unclassified
Otu01268	Bacteria	Proteobacteria	unclassified	unclassified	unclassified	unclassified
Otu01269	Bacteria	Proteobacteria	Gammaproteobacteria	Alteromonadales	OM60	unclassified
Otu01270	Bacteria	Proteobacteria	Gammaproteobacteria	Pseudomonadales	Pseudomonadaceae	Pseudomonas
Otu01271	Bacteria	Cyanobacteria	Synechococcophycideae	Synechococcales	Synechococcaceae	unclassified
Otu01272	Bacteria	Proteobacteria	Gammaproteobacteria	Alteromonadales	unclassified	unclassified
Otu01273	Bacteria	Proteobacteria	Gammaproteobacteria	unclassified	unclassified	unclassified
Otu01274	Bacteria	Proteobacteria	Gammaproteobacteria	unclassified	unclassified	unclassified
Otu01275	Bacteria	Proteobacteria	Gammaproteobacteria	Pseudomonadales	Moraxellaceae	Psychrobacter
Otu01276	Bacteria	Proteobacteria	Alphaproteobacteria	Rhodobacterales	Rhodobacteraceae	unclassified
Otu01277	Bacteria	Proteobacteria	Gammaproteobacteria	Oceanospirillales	unclassified	unclassified
Otu01278	Bacteria	Planctomycetes	BD7-11	unclassified	unclassified	unclassified
Otu01279	Bacteria	Proteobacteria	Gammaproteobacteria	Alteromonadales	Alteromonadaceae	unclassified
Otu01280	Bacteria	Bacteroidetes	Cytophagia	Cytophagales	Flammeovirgaceae	Marivirga
Otu01281	Bacteria	Bacteroidetes	Cytophagia	Cytophagales	Flammeovirgaceae	Roseivirga
Otu01282	Bacteria	Proteobacteria	Alphaproteobacteria	Rhodobacterales	Rhodobacteraceae	unclassified
Otu01283	Bacteria	Bacteroidetes	Cytophagia	Cytophagales	Flammeovirgaceae	unclassified
Otu01284	Bacteria	Proteobacteria	Gammaproteobacteria	Oceanospirillales	Halomonadaceae	Halomonas
Otu01285	Bacteria	Proteobacteria	Gammaproteobacteria	Oceanospirillales	Oceanospirillaceae	unclassified
Otu01286	Bacteria	Proteobacteria	Gammaproteobacteria	unclassified	unclassified	unclassified
Otu01287	Bacteria	Proteobacteria	Alphaproteobacteria	unclassified	unclassified	unclassified
Otu01288	Bacteria	Actinobacteria	Acidimicrobiia	Acidimicrobiales	C111	unclassified
Otu01289	Bacteria	Cyanobacteria	4C0d-2	MLE1-12	unclassified	unclassified
Otu01290	Bacteria	unclassified	unclassified	unclassified	unclassified	unclassified
Otu01291	Bacteria	Proteobacteria	Gammaproteobacteria	unclassified	unclassified	unclassified
Otu01292	Bacteria	Proteobacteria	unclassified	unclassified	unclassified	unclassified
Otu01293	Bacteria	Proteobacteria	Gammaproteobacteria	Vibrionales	Vibrionaceae	Vibrio
Otu01294	Bacteria	Proteobacteria	unclassified	unclassified	unclassified	unclassified
Otu01295	Bacteria	Proteobacteria	Alphaproteobacteria	unclassified	unclassified	unclassified
Otu01296	Bacteria	Proteobacteria	Gammaproteobacteria	unclassified	unclassified	unclassified
Otu01297	Bacteria	Proteobacteria	Alphaproteobacteria	Rhodobacterales	Rhodobacteraceae	unclassified
Otu01298	Bacteria	Proteobacteria	Alphaproteobacteria	Rhodospirillales	Rhodospirillaceae	unclassified
Otu01299	Bacteria	Proteobacteria	Deltaproteobacteria	unclassified	unclassified	unclassified
Otu01300	Bacteria	Proteobacteria	Gammaproteobacteria	unclassified	unclassified	unclassified
Otu01301	Bacteria	Proteobacteria	Gammaproteobacteria	unclassified	unclassified	unclassified
Otu01302	Bacteria	Proteobacteria	Alphaproteobacteria	unclassified	unclassified	unclassified
Otu01303	Bacteria	Proteobacteria	Gammaproteobacteria	unclassified	unclassified	unclassified
Otu01304	Bacteria	Proteobacteria	Gammaproteobacteria	Oceanospirillales	Oceanospirillaceae	Marinomonas
Otu01305	Bacteria	Proteobacteria	Alphaproteobacteria	unclassified	unclassified	unclassified
Otu01306	Bacteria	Proteobacteria	Deltaproteobacteria	Bdellovibrionales	Bdellovibrionaceae	Bdellovibrio
Otu01307	Bacteria	Proteobacteria	Alphaproteobacteria	Kiloniellales	Kiloniellaceae	Thalassospira
Otu01308	Bacteria	Cyanobacteria	4C0d-2	MLE1-12	unclassified	unclassified
Otu01309	Bacteria	Proteobacteria	Gammaproteobacteria	Alteromonadales	Alteromonadaceae	unclassified
Otu01310	Bacteria	Proteobacteria	unclassified	unclassified	unclassified	unclassified
Otu01311	Bacteria	Proteobacteria	unclassified	unclassified	unclassified	unclassified
Otu01312	Bacteria	Proteobacteria	Gammaproteobacteria	unclassified	unclassified	unclassified
Otu01313	Bacteria	Proteobacteria	Gammaproteobacteria	Alteromonadales	Alteromonadaceae	Alteromonas
Otu01314	Bacteria	Proteobacteria	Gammaproteobacteria	unclassified	unclassified	unclassified
Otu01315	Bacteria	Proteobacteria	Epsilonproteobacteria	Campylobacterales	Campylobacteraceae	Arcobacter
Otu01316	Bacteria	Bacteroidetes	Flavobacteriia	Flavobacteriales	Flavobacteriaceae	unclassified
Otu01317	Bacteria	Proteobacteria	unclassified	unclassified	unclassified	unclassified
Otu01318	Bacteria	Cyanobacteria	Synechococcophycideae	Synechococcales	Synechococcaceae	unclassified
Otu01319	Bacteria	Proteobacteria	Gammaproteobacteria	unclassified	unclassified	unclassified
Otu01320	Bacteria	Proteobacteria	unclassified	unclassified	unclassified	unclassified
Otu01321	Bacteria	Proteobacteria	Gammaproteobacteria	Alteromonadales	Alteromonadaceae	Alteromonas
Otu01322	Bacteria	Proteobacteria	Alphaproteobacteria	unclassified	unclassified	unclassified
Otu01323	Bacteria	Proteobacteria	Deltaproteobacteria	Myxococcales	unclassified	unclassified
Otu01324	Bacteria	Cyanobacteria	Synechococcophycideae	Synechococcales	Synechococcaceae	unclassified
Otu01325	Bacteria	Proteobacteria	Deltaproteobacteria	Bdellovibrionales	Bdellovibrionaceae	Bdellovibrio
Otu01326	Bacteria	Bacteroidetes	Flavobacteriia	Flavobacteriales	Flavobacteriaceae	unclassified
Otu01327	Bacteria	Proteobacteria	Gammaproteobacteria	Alteromonadales	Alteromonadaceae	Alteromonas
Otu01328	Bacteria	Proteobacteria	Gammaproteobacteria	Vibrionales	Vibrionaceae	Vibrio
Otu01329	Bacteria	Proteobacteria	Gammaproteobacteria	Vibrionales	Vibrionaceae	Vibrio
Otu01330	Bacteria	Proteobacteria	Gammaproteobacteria	Vibrionales	Vibrionaceae	Vibrio
Otu01331	Bacteria	Proteobacteria	Gammaproteobacteria	Alteromonadales	Alteromonadaceae	Porticoccus
Otu01332	Bacteria	Proteobacteria	Gammaproteobacteria	Vibrionales	Vibrionaceae	Vibrio
Otu01333	Bacteria	Bacteroidetes	Flavobacteriia	Flavobacteriales	Flavobacteriaceae	unclassified
Otu01334	Bacteria	Proteobacteria	Alphaproteobacteria	unclassified	unclassified	unclassified
Otu01335	Bacteria	Proteobacteria	Alphaproteobacteria	Rhodobacterales	Rhodobacteraceae	unclassified
Otu01336	Bacteria	Proteobacteria	Alphaproteobacteria	unclassified	unclassified	unclassified
Otu01337	Bacteria	Bacteroidetes	Flavobacteriia	Flavobacteriales	Flavobacteriaceae	Leeuwenhoekiella
Otu01338	Bacteria	Proteobacteria	Gammaproteobacteria	Vibrionales	Vibrionaceae	Vibrio
Otu01339	Bacteria	Proteobacteria	Gammaproteobacteria	unclassified	unclassified	unclassified
Otu01340	Bacteria	Proteobacteria	unclassified	unclassified	unclassified	unclassified
Otu01341	Bacteria	unclassified	unclassified	unclassified	unclassified	unclassified
Otu01342	Bacteria	Actinobacteria	Actinobacteria	Actinomycetales	Propionibacteriaceae	Propionibacterium
Otu01343	Bacteria	Actinobacteria	Nitriliruptoria	Nitriliruptorales	Nitriliruptoraceae	unclassified
Otu01344	Bacteria	Proteobacteria	Gammaproteobacteria	Vibrionales	Vibrionaceae	Vibrio
Otu01345	Bacteria	Tenericutes	Mollicutes	unclassified	unclassified	unclassified
Otu01346	Bacteria	Bacteroidetes	Flavobacteriia	Flavobacteriales	Flavobacteriaceae	Ulvibacter
Otu01347	Bacteria	Proteobacteria	Alphaproteobacteria	Rickettsiales	Pelagibacteraceae	unclassified
Otu01348	Bacteria	Proteobacteria	Gammaproteobacteria	unclassified	unclassified	unclassified
Otu01349	Bacteria	Proteobacteria	Alphaproteobacteria	Sphingomonadales	Erythrobacteraceae	Erythrobacter
Otu01350	Bacteria	Bacteroidetes	unclassified	unclassified	unclassified	unclassified
Otu01351	Bacteria	Firmicutes	Bacilli	Bacillales	[Exiguobacteraceae]	Exiguobacterium
Otu01352	Bacteria	Proteobacteria	Gammaproteobacteria	unclassified	unclassified	unclassified
Otu01353	Bacteria	Proteobacteria	Alphaproteobacteria	Rhodobacterales	Rhodobacteraceae	unclassified
Otu01354	Bacteria	Cyanobacteria	4C0d-2	MLE1-12	unclassified	unclassified
Otu01355	Bacteria	Bacteroidetes	unclassified	unclassified	unclassified	unclassified
Otu01356	Bacteria	Proteobacteria	Gammaproteobacteria	unclassified	unclassified	unclassified
Otu01357	Bacteria	Proteobacteria	Alphaproteobacteria	Rhodobacterales	Rhodobacteraceae	unclassified
Otu01358	Bacteria	Bacteroidetes	unclassified	unclassified	unclassified	unclassified
Otu01359	Bacteria	Proteobacteria	Gammaproteobacteria	Enterobacteriales	Enterobacteriaceae	unclassified
Otu01360	Bacteria	unclassified	unclassified	unclassified	unclassified	unclassified
Otu01361	Bacteria	unclassified	unclassified	unclassified	unclassified	unclassified
Otu01362	Bacteria	Proteobacteria	Alphaproteobacteria	Rhizobiales	Hyphomicrobiaceae	Devosia
Otu01363	Bacteria	Cyanobacteria	unclassified	unclassified	unclassified	unclassified
Otu01364	Bacteria	Bacteroidetes	Flavobacteriia	Flavobacteriales	Cryomorphaceae	Fluviicola
Otu01365	Bacteria	Fusobacteria	Fusobacteriia	Fusobacteriales	Fusobacteriaceae	Fusobacterium
Otu01366	Bacteria	Proteobacteria	Gammaproteobacteria	unclassified	unclassified	unclassified
Otu01367	Bacteria	Proteobacteria	Gammaproteobacteria	Xanthomonadales	Sinobacteraceae	unclassified
Otu01368	Bacteria	Proteobacteria	Alphaproteobacteria	unclassified	unclassified	unclassified
Otu01369	Bacteria	Proteobacteria	Gammaproteobacteria	unclassified	unclassified	unclassified
Otu01370	Bacteria	Proteobacteria	Alphaproteobacteria	Rhodobacterales	Rhodobacteraceae	unclassified
Otu01371	Bacteria	Firmicutes	Bacilli	Lactobacillales	Aerococcaceae	Facklamia
Otu01372	Bacteria	Bacteroidetes	Flavobacteriia	Flavobacteriales	Flavobacteriaceae	Winogradskyella
Otu01373	Bacteria	Proteobacteria	unclassified	unclassified	unclassified	unclassified
Otu01374	Bacteria	Proteobacteria	Gammaproteobacteria	unclassified	unclassified	unclassified
Otu01375	Bacteria	Proteobacteria	Gammaproteobacteria	Pseudomonadales	Pseudomonadaceae	Pseudomonas
Otu01376	Bacteria	Proteobacteria	Gammaproteobacteria	Alteromonadales	OM60	unclassified
Otu01377	Bacteria	Proteobacteria	Alphaproteobacteria	Rhodobacterales	Rhodobacteraceae	Paracoccus
Otu01378	Bacteria	Proteobacteria	unclassified	unclassified	unclassified	unclassified
Otu01379	Bacteria	Proteobacteria	Gammaproteobacteria	Alteromonadales	Alteromonadaceae	Alteromonas
Otu01380	Bacteria	Proteobacteria	Gammaproteobacteria	Oceanospirillales	unclassified	unclassified
Otu01381	Bacteria	Firmicutes	Bacilli	Lactobacillales	Leuconostocaceae	Leuconostoc
Otu01382	Bacteria	Bacteroidetes	Flavobacteriia	Flavobacteriales	Flavobacteriaceae	unclassified
Otu01383	Bacteria	Proteobacteria	Gammaproteobacteria	unclassified	unclassified	unclassified
Otu01384	Bacteria	Proteobacteria	Alphaproteobacteria	Rhodobacterales	Rhodobacteraceae	unclassified
Otu01385	Bacteria	unclassified	unclassified	unclassified	unclassified	unclassified
Otu01386	Bacteria	Proteobacteria	Alphaproteobacteria	unclassified	unclassified	unclassified
Otu01387	Bacteria	Proteobacteria	Alphaproteobacteria	Rhodobacterales	Rhodobacteraceae	unclassified
Otu01388	Bacteria	Proteobacteria	Gammaproteobacteria	Alteromonadales	Alteromonadaceae	Alteromonas
Otu01389	Bacteria	Proteobacteria	Alphaproteobacteria	Rhodobacterales	Rhodobacteraceae	unclassified
Otu01390	Bacteria	Proteobacteria	Alphaproteobacteria	Rhodobacterales	Rhodobacteraceae	unclassified
Otu01391	Bacteria	Proteobacteria	Gammaproteobacteria	Oceanospirillales	Oceanospirillaceae	Marinomonas
Otu01392	Bacteria	Proteobacteria	Alphaproteobacteria	Rhizobiales	unclassified	unclassified
Otu01393	Bacteria	Proteobacteria	Gammaproteobacteria	unclassified	unclassified	unclassified
Otu01394	Bacteria	Proteobacteria	Gammaproteobacteria	Oceanospirillales	Oceanospirillaceae	Marinomonas
Otu01395	Bacteria	Proteobacteria	Gammaproteobacteria	Alteromonadales	Alteromonadaceae	Glaciecola
Otu01396	Bacteria	Proteobacteria	Gammaproteobacteria	Alteromonadales	Alteromonadaceae	Alteromonas
Otu01397	Bacteria	Proteobacteria	Alphaproteobacteria	Rhodobacterales	Rhodobacteraceae	unclassified
Otu01398	Bacteria	Proteobacteria	Alphaproteobacteria	unclassified	unclassified	unclassified
Otu01399	Bacteria	Proteobacteria	Gammaproteobacteria	Oceanospirillales	Oceanospirillaceae	unclassified
Otu01400	Bacteria	Proteobacteria	Alphaproteobacteria	Rhodobacterales	Hyphomonadaceae	unclassified
Otu01401	Bacteria	Bacteroidetes	Bacteroidia	Bacteroidales	Bacteroidaceae	Bacteroides
Otu01402	Bacteria	Proteobacteria	Alphaproteobacteria	unclassified	unclassified	unclassified
Otu01403	Bacteria	Proteobacteria	Gammaproteobacteria	Vibrionales	unclassified	unclassified
Otu01404	Bacteria	Proteobacteria	Gammaproteobacteria	Vibrionales	Vibrionaceae	Vibrio
Otu01405	Bacteria	Cyanobacteria	4C0d-2	SM2F09	unclassified	unclassified
Otu01406	Bacteria	Actinobacteria	Actinobacteria	Actinomycetales	Microbacteriaceae	unclassified
Otu01407	Bacteria	Proteobacteria	Alphaproteobacteria	Rhodobacterales	Rhodobacteraceae	unclassified
Otu01408	Bacteria	Proteobacteria	Gammaproteobacteria	unclassified	unclassified	unclassified
Otu01409	Bacteria	TM6	SJA-4	unclassified	unclassified	unclassified
Otu01410	Bacteria	Proteobacteria	Gammaproteobacteria	Alteromonadales	Alteromonadaceae	Glaciecola
Otu01411	Bacteria	Proteobacteria	Gammaproteobacteria	Vibrionales	Vibrionaceae	Vibrio
Otu01412	Bacteria	Proteobacteria	Alphaproteobacteria	Rhodobacterales	Rhodobacteraceae	unclassified
Otu01413	Bacteria	Actinobacteria	Actinobacteria	Actinomycetales	Nocardiaceae	Rhodococcus
Otu01414	Bacteria	Proteobacteria	Gammaproteobacteria	unclassified	unclassified	unclassified
Otu01415	Bacteria	Proteobacteria	Gammaproteobacteria	Alteromonadales	HTCC2188	HTCC
Otu01416	Bacteria	Proteobacteria	Alphaproteobacteria	unclassified	unclassified	unclassified
Otu01417	Bacteria	Bacteroidetes	Flavobacteriia	Flavobacteriales	Flavobacteriaceae	unclassified
Otu01418	Bacteria	Proteobacteria	Gammaproteobacteria	Vibrionales	Pseudoalteromonadaceae	Pseudoalteromonas
Otu01419	Bacteria	Firmicutes	Bacilli	Bacillales	Bacillaceae	Bacillus
Otu01420	Bacteria	Proteobacteria	unclassified	unclassified	unclassified	unclassified
Otu01421	Bacteria	Cyanobacteria	4C0d-2	MLE1-12	unclassified	unclassified
Otu01422	Bacteria	Proteobacteria	unclassified	unclassified	unclassified	unclassified
Otu01423	Bacteria	Proteobacteria	unclassified	unclassified	unclassified	unclassified
Otu01424	Bacteria	Proteobacteria	Alphaproteobacteria	Rhizobiales	Rhizobiaceae	unclassified
Otu01425	Bacteria	Proteobacteria	Gammaproteobacteria	Vibrionales	Vibrionaceae	Vibrio
Otu01426	Bacteria	unclassified	unclassified	unclassified	unclassified	unclassified
Otu01427	Bacteria	Proteobacteria	unclassified	unclassified	unclassified	unclassified
Otu01428	Bacteria	Bacteroidetes	Flavobacteriia	Flavobacteriales	Flavobacteriaceae	unclassified
Otu01429	Bacteria	Verrucomicrobia	Verrucomicrobiae	Verrucomicrobiales	Verrucomicrobiaceae	unclassified
Otu01430	Bacteria	Proteobacteria	Gammaproteobacteria	Pseudomonadales	Pseudomonadaceae	Pseudomonas
Otu01431	Bacteria	Proteobacteria	Alphaproteobacteria	BD7-3	unclassified	unclassified
Otu01432	Bacteria	Proteobacteria	Alphaproteobacteria	unclassified	unclassified	unclassified
Otu01433	Bacteria	Proteobacteria	Alphaproteobacteria	Rickettsiales	Pelagibacteraceae	unclassified
Otu01434	Bacteria	Proteobacteria	unclassified	unclassified	unclassified	unclassified
Otu01435	Bacteria	Proteobacteria	Alphaproteobacteria	Rhodobacterales	Rhodobacteraceae	unclassified
Otu01436	Bacteria	Proteobacteria	Deltaproteobacteria	unclassified	unclassified	unclassified
Otu01437	Bacteria	Bacteroidetes	Flavobacteriia	Flavobacteriales	Flavobacteriaceae	unclassified
Otu01438	Bacteria	Bacteroidetes	unclassified	unclassified	unclassified	unclassified
Otu01439	Bacteria	Proteobacteria	Alphaproteobacteria	BD7-3	unclassified	unclassified
Otu01440	Bacteria	Proteobacteria	unclassified	unclassified	unclassified	unclassified
Otu01441	Bacteria	Proteobacteria	Gammaproteobacteria	Oceanospirillales	Oceanospirillaceae	Marinomonas
Otu01442	Bacteria	Proteobacteria	unclassified	unclassified	unclassified	unclassified
Otu01443	Bacteria	Bacteroidetes	Flavobacteriia	Flavobacteriales	Flavobacteriaceae	unclassified
Otu01444	Bacteria	Proteobacteria	Deltaproteobacteria	NB1-j	JTB38	unclassified
Otu01445	Bacteria	Proteobacteria	unclassified	unclassified	unclassified	unclassified
Otu01446	Bacteria	Proteobacteria	Alphaproteobacteria	unclassified	unclassified	unclassified
Otu01447	Bacteria	Proteobacteria	Gammaproteobacteria	Alteromonadales	unclassified	unclassified
Otu01448	Bacteria	Proteobacteria	Alphaproteobacteria	Rhodobacterales	Rhodobacteraceae	unclassified
Otu01449	Bacteria	Proteobacteria	Deltaproteobacteria	NB1-j	JTB38	unclassified
Otu01450	Bacteria	Proteobacteria	Gammaproteobacteria	unclassified	unclassified	unclassified
Otu01451	Bacteria	Bacteroidetes	Flavobacteriia	Flavobacteriales	Flavobacteriaceae	unclassified
Otu01452	Bacteria	Proteobacteria	unclassified	unclassified	unclassified	unclassified
Otu01453	Bacteria	Firmicutes	Bacilli	Bacillales	Staphylococcaceae	Staphylococcus
Otu01454	Bacteria	Proteobacteria	Gammaproteobacteria	Enterobacteriales	Enterobacteriaceae	Shigella
Otu01455	Bacteria	Proteobacteria	Gammaproteobacteria	Vibrionales	Vibrionaceae	Vibrio
Otu01456	Bacteria	Proteobacteria	unclassified	unclassified	unclassified	unclassified
Otu01457	Bacteria	Actinobacteria	Nitriliruptoria	Nitriliruptorales	Nitriliruptoraceae	unclassified
Otu01458	Bacteria	Fusobacteria	Fusobacteriia	Fusobacteriales	Fusobacteriaceae	Fusobacterium
Otu01459	Bacteria	Proteobacteria	Gammaproteobacteria	unclassified	unclassified	unclassified
Otu01460	Bacteria	Proteobacteria	unclassified	unclassified	unclassified	unclassified
Otu01461	Bacteria	Proteobacteria	Alphaproteobacteria	Rhizobiales	Methylobacteriaceae	Methylobacterium
Otu01462	Bacteria	Proteobacteria	Gammaproteobacteria	Oceanospirillales	Oceanospirillaceae	Neptunomonas
Otu01463	Bacteria	Proteobacteria	Gammaproteobacteria	Vibrionales	Vibrionaceae	Vibrio
Otu01464	Bacteria	Proteobacteria	Alphaproteobacteria	Rhodobacterales	Rhodobacteraceae	Octadecabacter
Otu01465	Bacteria	Bacteroidetes	unclassified	unclassified	unclassified	unclassified
Otu01466	Bacteria	Proteobacteria	Gammaproteobacteria	Oceanospirillales	unclassified	unclassified
Otu01467	Bacteria	Proteobacteria	Alphaproteobacteria	Rhodobacterales	Rhodobacteraceae	unclassified
Otu01468	Bacteria	Bacteroidetes	[Rhodothermi]	[Rhodothermales]	[Balneolaceae]	KSA1
Otu01469	Bacteria	Proteobacteria	Alphaproteobacteria	Rhodobacterales	Rhodobacteraceae	unclassified
Otu01470	Bacteria	Actinobacteria	Acidimicrobiia	Acidimicrobiales	C111	unclassified
Otu01471	Bacteria	Proteobacteria	Alphaproteobacteria	Sphingomonadales	Sphingomonadaceae	Sphingomonas
Otu01472	Bacteria	Cyanobacteria	4C0d-2	MLE1-12	unclassified	unclassified
Otu01473	Bacteria	Proteobacteria	Gammaproteobacteria	Vibrionales	Vibrionaceae	Vibrio
Otu01474	Bacteria	Proteobacteria	unclassified	unclassified	unclassified	unclassified
Otu01475	Bacteria	Proteobacteria	Betaproteobacteria	Burkholderiales	Comamonadaceae	Tepidimonas
Otu01476	Bacteria	Firmicutes	Clostridia	Clostridiales	Peptostreptococcaceae	Peptostreptococcus
Otu01477	Bacteria	Proteobacteria	Gammaproteobacteria	Alteromonadales	[Chromatiaceae]	Rheinheimera
Otu01478	Bacteria	Proteobacteria	Gammaproteobacteria	Oceanospirillales	unclassified	unclassified
Otu01479	Bacteria	unclassified	unclassified	unclassified	unclassified	unclassified
Otu01480	Bacteria	Proteobacteria	Gammaproteobacteria	unclassified	unclassified	unclassified
Otu01481	Bacteria	Proteobacteria	Gammaproteobacteria	Chromatiales	Chromatiaceae	unclassified
Otu01482	Bacteria	Proteobacteria	Gammaproteobacteria	Vibrionales	Vibrionaceae	Vibrio
Otu01483	Bacteria	Proteobacteria	Alphaproteobacteria	Rhizobiales	Beijerinckiaceae	Chelatococcus
Otu01484	Bacteria	Planctomycetes	BD7-11	unclassified	unclassified	unclassified
Otu01485	Bacteria	Proteobacteria	Gammaproteobacteria	Vibrionales	Pseudoalteromonadaceae	Pseudoalteromonas
Otu01486	Bacteria	Proteobacteria	Gammaproteobacteria	Vibrionales	Vibrionaceae	Vibrio
Otu01487	Bacteria	Proteobacteria	Alphaproteobacteria	Rhodobacterales	Rhodobacteraceae	Octadecabacter
Otu01488	Bacteria	Bacteroidetes	Flavobacteriia	Flavobacteriales	Flavobacteriaceae	unclassified
Otu01489	Bacteria	Proteobacteria	Gammaproteobacteria	Oceanospirillales	Oceanospirillaceae	unclassified
Otu01490	Bacteria	Proteobacteria	Alphaproteobacteria	Rhizobiales	unclassified	unclassified
Otu01491	Bacteria	Proteobacteria	Gammaproteobacteria	Vibrionales	Vibrionaceae	Vibrio
Otu01492	Bacteria	Proteobacteria	Gammaproteobacteria	Vibrionales	Vibrionaceae	Vibrio
Otu01493	Bacteria	Proteobacteria	Gammaproteobacteria	Vibrionales	Vibrionaceae	Vibrio
Otu01494	Bacteria	Cyanobacteria	unclassified	unclassified	unclassified	unclassified
Otu01495	Bacteria	Proteobacteria	Gammaproteobacteria	Vibrionales	Vibrionaceae	Vibrio
Otu01496	Bacteria	Proteobacteria	Alphaproteobacteria	unclassified	unclassified	unclassified
Otu01497	Bacteria	Proteobacteria	Gammaproteobacteria	Vibrionales	Vibrionaceae	Vibrio
Otu01498	Bacteria	Proteobacteria	Gammaproteobacteria	Vibrionales	Vibrionaceae	Vibrio
Otu01499	Bacteria	Proteobacteria	unclassified	unclassified	unclassified	unclassified
Otu01500	Bacteria	Proteobacteria	Gammaproteobacteria	Oceanospirillales	Oleiphilaceae	unclassified
Otu01501	Bacteria	Proteobacteria	Gammaproteobacteria	Vibrionales	Vibrionaceae	Vibrio
Otu01502	Bacteria	Proteobacteria	Gammaproteobacteria	Vibrionales	Pseudoalteromonadaceae	Pseudoalteromonas
Otu01503	Bacteria	Proteobacteria	Gammaproteobacteria	unclassified	unclassified	unclassified
Otu01504	Bacteria	Proteobacteria	Alphaproteobacteria	unclassified	unclassified	unclassified
Otu01505	Bacteria	Proteobacteria	Gammaproteobacteria	Alteromonadales	Alteromonadaceae	Alteromonas
Otu01506	Bacteria	Proteobacteria	unclassified	unclassified	unclassified	unclassified
Otu01507	Bacteria	Proteobacteria	Alphaproteobacteria	Kiloniellales	Kiloniellaceae	Thalassospira
Otu01508	Bacteria	Proteobacteria	Gammaproteobacteria	unclassified	unclassified	unclassified
Otu01509	Bacteria	Proteobacteria	Gammaproteobacteria	Xanthomonadales	Sinobacteraceae	unclassified
Otu01510	Bacteria	Bacteroidetes	Flavobacteriia	Flavobacteriales	Flavobacteriaceae	unclassified
Otu01511	Bacteria	Proteobacteria	unclassified	unclassified	unclassified	unclassified
Otu01512	Bacteria	Proteobacteria	unclassified	unclassified	unclassified	unclassified
Otu01513	Bacteria	Proteobacteria	unclassified	unclassified	unclassified	unclassified
Otu01514	Bacteria	Proteobacteria	Alphaproteobacteria	Rhodobacterales	Rhodobacteraceae	unclassified
Otu01515	Bacteria	Proteobacteria	Gammaproteobacteria	Pseudomonadales	Pseudomonadaceae	Pseudomonas
Otu01516	Bacteria	Proteobacteria	Gammaproteobacteria	Alteromonadales	[Chromatiaceae]	unclassified
Otu01517	Bacteria	Bacteroidetes	Flavobacteriia	Flavobacteriales	Cryomorphaceae	Fluviicola
Otu01518	Bacteria	Proteobacteria	Gammaproteobacteria	Thiotrichales	Piscirickettsiaceae	Methylophaga
Otu01519	Bacteria	Proteobacteria	Alphaproteobacteria	Rhodobacterales	Rhodobacteraceae	unclassified
Otu01520	Bacteria	Proteobacteria	Alphaproteobacteria	Rhodobacterales	unclassified	unclassified
Otu01521	Bacteria	Proteobacteria	Alphaproteobacteria	unclassified	unclassified	unclassified
Otu01522	Bacteria	Proteobacteria	Alphaproteobacteria	unclassified	unclassified	unclassified
Otu01523	Bacteria	Bacteroidetes	Flavobacteriia	Flavobacteriales	unclassified	unclassified
Otu01524	Bacteria	Proteobacteria	unclassified	unclassified	unclassified	unclassified
Otu01525	Bacteria	Proteobacteria	Alphaproteobacteria	unclassified	unclassified	unclassified
Otu01526	Bacteria	Bacteroidetes	Flavobacteriia	Flavobacteriales	Flavobacteriaceae	unclassified
Otu01527	Bacteria	Proteobacteria	unclassified	unclassified	unclassified	unclassified
Otu01528	Bacteria	Proteobacteria	unclassified	unclassified	unclassified	unclassified
Otu01529	Bacteria	Proteobacteria	unclassified	unclassified	unclassified	unclassified
Otu01530	Bacteria	Proteobacteria	unclassified	unclassified	unclassified	unclassified
Otu01531	Bacteria	Proteobacteria	Gammaproteobacteria	Pseudomonadales	Pseudomonadaceae	Pseudomonas
Otu01532	Bacteria	Proteobacteria	unclassified	unclassified	unclassified	unclassified
Otu01533	Bacteria	Bacteroidetes	Flavobacteriia	Flavobacteriales	Flavobacteriaceae	Flavobacterium
Otu01534	Bacteria	Proteobacteria	Alphaproteobacteria	Sphingomonadales	unclassified	unclassified
Otu01535	Bacteria	Proteobacteria	unclassified	unclassified	unclassified	unclassified
Otu01536	Bacteria	Proteobacteria	Alphaproteobacteria	Rhodobacterales	Rhodobacteraceae	Marivita
Otu01537	Bacteria	Bacteroidetes	Flavobacteriia	Flavobacteriales	Cryomorphaceae	unclassified
Otu01538	Bacteria	Proteobacteria	Alphaproteobacteria	Rhodobacterales	Rhodobacteraceae	unclassified
Otu01539	Bacteria	Bacteroidetes	Flavobacteriia	Flavobacteriales	Flavobacteriaceae	unclassified
Otu01540	Bacteria	Proteobacteria	Gammaproteobacteria	Oceanospirillales	Halomonadaceae	Candidatus_Portiera
Otu01541	Bacteria	Proteobacteria	Gammaproteobacteria	Oceanospirillales	Oceanospirillaceae	unclassified
Otu01542	Bacteria	Proteobacteria	Gammaproteobacteria	Oceanospirillales	Oceanospirillaceae	Marinomonas
Otu01543	Bacteria	Proteobacteria	Gammaproteobacteria	Oceanospirillales	Oceanospirillaceae	Marinomonas
Otu01544	Bacteria	Proteobacteria	Gammaproteobacteria	unclassified	unclassified	unclassified
Otu01545	Bacteria	Proteobacteria	Gammaproteobacteria	Vibrionales	Vibrionaceae	Vibrio
Otu01546	Bacteria	Proteobacteria	Gammaproteobacteria	Oceanospirillales	Oceanospirillaceae	Litoribacillus
Otu01547	Bacteria	Proteobacteria	Gammaproteobacteria	Oceanospirillales	Oleiphilaceae	unclassified
Otu01548	Bacteria	Proteobacteria	Alphaproteobacteria	Rhodobacterales	Rhodobacteraceae	unclassified
Otu01549	Bacteria	Bacteroidetes	Flavobacteriia	Flavobacteriales	Flavobacteriaceae	unclassified
Otu01550	Bacteria	Proteobacteria	Alphaproteobacteria	Rhodobacterales	Rhodobacteraceae	unclassified
Otu01551	Bacteria	Proteobacteria	Alphaproteobacteria	unclassified	unclassified	unclassified
Otu01552	Bacteria	Proteobacteria	Alphaproteobacteria	Rhizobiales	unclassified	unclassified
Otu01553	Bacteria	Proteobacteria	unclassified	unclassified	unclassified	unclassified
Otu01554	Bacteria	Proteobacteria	Alphaproteobacteria	unclassified	unclassified	unclassified
Otu01555	Bacteria	Bacteroidetes	Flavobacteriia	Flavobacteriales	Flavobacteriaceae	Flavobacterium
Otu01556	Bacteria	Proteobacteria	Alphaproteobacteria	unclassified	unclassified	unclassified
Otu01557	Bacteria	Proteobacteria	Gammaproteobacteria	unclassified	unclassified	unclassified
Otu01558	Bacteria	Proteobacteria	unclassified	unclassified	unclassified	unclassified
Otu01559	Bacteria	Bacteroidetes	Flavobacteriia	Flavobacteriales	Flavobacteriaceae	Winogradskyella
Otu01560	Bacteria	Proteobacteria	Alphaproteobacteria	unclassified	unclassified	unclassified
Otu01561	Bacteria	Proteobacteria	Gammaproteobacteria	unclassified	unclassified	unclassified
Otu01562	Bacteria	Proteobacteria	Deltaproteobacteria	unclassified	unclassified	unclassified
Otu01563	Bacteria	Proteobacteria	Alphaproteobacteria	unclassified	unclassified	unclassified
Otu01564	Bacteria	Proteobacteria	Alphaproteobacteria	Rhizobiales	unclassified	unclassified
Otu01565	Bacteria	Proteobacteria	Gammaproteobacteria	unclassified	unclassified	unclassified
Otu01566	Bacteria	Bacteroidetes	[Saprospirae]	[Saprospirales]	Saprospiraceae	Saprospira
Otu01567	Bacteria	Proteobacteria	Deltaproteobacteria	NB1-j	JTB38	unclassified
Otu01568	Bacteria	Proteobacteria	Alphaproteobacteria	Rhodobacterales	Rhodobacteraceae	unclassified
Otu01569	Bacteria	Cyanobacteria	4C0d-2	MLE1-12	unclassified	unclassified
Otu01570	Bacteria	Proteobacteria	Gammaproteobacteria	Alteromonadales	Alteromonadaceae	Alteromonas
Otu01571	Bacteria	Proteobacteria	Epsilonproteobacteria	Campylobacterales	Campylobacteraceae	Arcobacter
Otu01572	Bacteria	Proteobacteria	Epsilonproteobacteria	Campylobacterales	Campylobacteraceae	Campylobacter
Otu01573	Bacteria	Cyanobacteria	4C0d-2	MLE1-12	unclassified	unclassified
Otu01574	Bacteria	unclassified	unclassified	unclassified	unclassified	unclassified
Otu01575	Bacteria	Proteobacteria	Gammaproteobacteria	unclassified	unclassified	unclassified
Otu01576	Bacteria	Proteobacteria	Alphaproteobacteria	Rhodobacterales	Rhodobacteraceae	Octadecabacter
Otu01577	Bacteria	unclassified	unclassified	unclassified	unclassified	unclassified
Otu01578	Bacteria	Bacteroidetes	Bacteroidia	Bacteroidales	[Paraprevotellaceae]	[Prevotella]
Otu01579	Bacteria	Bacteroidetes	Flavobacteriia	Flavobacteriales	[Weeksellaceae]	Chryseobacterium
Otu01580	Bacteria	Proteobacteria	Deltaproteobacteria	Bdellovibrionales	Bdellovibrionaceae	Bdellovibrio
Otu01581	Bacteria	Proteobacteria	Gammaproteobacteria	unclassified	unclassified	unclassified
Otu01582	Bacteria	Proteobacteria	Gammaproteobacteria	Enterobacteriales	Enterobacteriaceae	unclassified
Otu01583	Bacteria	Cyanobacteria	unclassified	unclassified	unclassified	unclassified
Otu01584	Bacteria	Proteobacteria	Gammaproteobacteria	Alteromonadales	Alteromonadaceae	unclassified
Otu01585	Bacteria	Bacteroidetes	unclassified	unclassified	unclassified	unclassified
Otu01586	Bacteria	unclassified	unclassified	unclassified	unclassified	unclassified
Otu01587	Bacteria	Proteobacteria	Alphaproteobacteria	Rhodobacterales	Rhodobacteraceae	unclassified
Otu01588	Bacteria	Cyanobacteria	Synechococcophycideae	Synechococcales	Synechococcaceae	unclassified
Otu01589	Bacteria	Cyanobacteria	Oscillatoriophycideae	Chroococcales	Gomphosphaeriaceae	Snowella
Otu01590	Bacteria	Proteobacteria	Gammaproteobacteria	Alteromonadales	Alteromonadaceae	Alteromonas
Otu01591	Bacteria	Proteobacteria	Gammaproteobacteria	[Marinicellales]	[Marinicellaceae]	Marinicella
Otu01592	Bacteria	Proteobacteria	Gammaproteobacteria	Alteromonadales	Alteromonadaceae	unclassified
Otu01593	Bacteria	Bacteroidetes	unclassified	unclassified	unclassified	unclassified
Otu01594	Bacteria	Proteobacteria	Gammaproteobacteria	Alteromonadales	Alteromonadaceae	Glaciecola
Otu01595	Bacteria	Bacteroidetes	Flavobacteriia	Flavobacteriales	Flavobacteriaceae	unclassified
Otu01596	Bacteria	Tenericutes	Mollicutes	Mycoplasmatales	Mycoplasmataceae	Mycoplasma
Otu01597	Bacteria	Proteobacteria	Gammaproteobacteria	Alteromonadales	Alteromonadaceae	unclassified
Otu01598	Bacteria	Proteobacteria	Gammaproteobacteria	Alteromonadales	Alteromonadaceae	unclassified
Otu01599	Bacteria	Firmicutes	Clostridia	Clostridiales	Peptostreptococcaceae	Filifactor
Otu01600	Bacteria	Proteobacteria	Gammaproteobacteria	Oceanospirillales	Alcanivoracaceae	Alcanivorax
Otu01601	Bacteria	Proteobacteria	Gammaproteobacteria	Alteromonadales	OM60	unclassified
Otu01602	Bacteria	Proteobacteria	Gammaproteobacteria	Alteromonadales	Alteromonadaceae	Alteromonas
Otu01603	Bacteria	Cyanobacteria	Synechococcophycideae	Synechococcales	Synechococcaceae	Synechococcus
Otu01604	Bacteria	Proteobacteria	Alphaproteobacteria	Rhodobacterales	Rhodobacteraceae	unclassified
Otu01605	Bacteria	Proteobacteria	Alphaproteobacteria	Rhodobacterales	Rhodobacteraceae	unclassified
Otu01606	Bacteria	Proteobacteria	Alphaproteobacteria	Rhodobacterales	Rhodobacteraceae	unclassified
Otu01607	Bacteria	Proteobacteria	unclassified	unclassified	unclassified	unclassified
Otu01608	Bacteria	Proteobacteria	Gammaproteobacteria	unclassified	unclassified	unclassified
Otu01609	Bacteria	Proteobacteria	Alphaproteobacteria	Rickettsiales	Pelagibacteraceae	Pelagibacter
Otu01610	Bacteria	unclassified	unclassified	unclassified	unclassified	unclassified
Otu01611	Bacteria	unclassified	unclassified	unclassified	unclassified	unclassified
Otu01612	Bacteria	Cyanobacteria	Synechococcophycideae	Synechococcales	unclassified	unclassified
Otu01613	Bacteria	Proteobacteria	unclassified	unclassified	unclassified	unclassified
Otu01614	Bacteria	Proteobacteria	Gammaproteobacteria	unclassified	unclassified	unclassified
Otu01615	Bacteria	Proteobacteria	Gammaproteobacteria	Alteromonadales	Alteromonadaceae	Alteromonas
Otu01616	Bacteria	Proteobacteria	Gammaproteobacteria	Alteromonadales	Alteromonadaceae	unclassified
Otu01617	Bacteria	Cyanobacteria	Synechococcophycideae	Synechococcales	Synechococcaceae	Synechococcus
Otu01618	Bacteria	Bacteroidetes	Flavobacteriia	Flavobacteriales	unclassified	unclassified
Otu01619	Bacteria	Proteobacteria	Alphaproteobacteria	Rhodobacterales	Rhodobacteraceae	unclassified
Otu01620	Bacteria	Proteobacteria	Betaproteobacteria	unclassified	unclassified	unclassified
Otu01621	Bacteria	Proteobacteria	Deltaproteobacteria	unclassified	unclassified	unclassified
Otu01622	Bacteria	Proteobacteria	Alphaproteobacteria	unclassified	unclassified	unclassified
Otu01623	Bacteria	Proteobacteria	Alphaproteobacteria	Rickettsiales	Pelagibacteraceae	unclassified
Otu01624	Bacteria	Proteobacteria	Alphaproteobacteria	Rhodobacterales	Rhodobacteraceae	unclassified
Otu01625	Bacteria	unclassified	unclassified	unclassified	unclassified	unclassified
Otu01626	Bacteria	Proteobacteria	Alphaproteobacteria	Rhodobacterales	Rhodobacteraceae	unclassified
Otu01627	Bacteria	Proteobacteria	Alphaproteobacteria	Rhizobiales	unclassified	unclassified
Otu01628	Bacteria	Bacteroidetes	Cytophagia	Cytophagales	Flammeovirgaceae	Roseivirga
Otu01629	Bacteria	Proteobacteria	Alphaproteobacteria	Kiloniellales	Kiloniellaceae	Thalassospira
Otu01630	Bacteria	Proteobacteria	Gammaproteobacteria	Alteromonadales	Alteromonadaceae	unclassified
Otu01631	Bacteria	Proteobacteria	Gammaproteobacteria	unclassified	unclassified	unclassified
Otu01632	Bacteria	Proteobacteria	Alphaproteobacteria	unclassified	unclassified	unclassified
Otu01633	Bacteria	Proteobacteria	Alphaproteobacteria	Rhodobacterales	Rhodobacteraceae	unclassified
Otu01634	Bacteria	Proteobacteria	Gammaproteobacteria	unclassified	unclassified	unclassified
Otu01635	Bacteria	Proteobacteria	Alphaproteobacteria	Rhodobacterales	Rhodobacteraceae	Phaeobacter
Otu01636	Bacteria	Proteobacteria	Gammaproteobacteria	unclassified	unclassified	unclassified
Otu01637	Bacteria	Proteobacteria	Alphaproteobacteria	Kiloniellales	Kiloniellaceae	Thalassospira
Otu01638	Bacteria	Proteobacteria	Alphaproteobacteria	Rhodobacterales	Rhodobacteraceae	unclassified
Otu01639	Bacteria	Proteobacteria	Alphaproteobacteria	Kiloniellales	Kiloniellaceae	Thalassospira
Otu01640	Bacteria	Planctomycetes	BD7-11	unclassified	unclassified	unclassified
Otu01641	Bacteria	Proteobacteria	Gammaproteobacteria	Alteromonadales	Alteromonadaceae	unclassified
Otu01642	Bacteria	Proteobacteria	Alphaproteobacteria	Rhodobacterales	Rhodobacteraceae	unclassified
Otu01643	Bacteria	Proteobacteria	Alphaproteobacteria	Rhodobacterales	Rhodobacteraceae	unclassified
Otu01644	Bacteria	Proteobacteria	Alphaproteobacteria	Rhodobacterales	Rhodobacteraceae	unclassified
Otu01645	Bacteria	Actinobacteria	Actinobacteria	Actinomycetales	Corynebacteriaceae	Corynebacterium
Otu01646	Bacteria	Bacteroidetes	Flavobacteriia	Flavobacteriales	Flavobacteriaceae	Kriegella
Otu01647	Bacteria	Proteobacteria	Alphaproteobacteria	Rhodobacterales	Rhodobacteraceae	unclassified
Otu01648	Bacteria	Bacteroidetes	Flavobacteriia	Flavobacteriales	unclassified	unclassified
Otu01649	Bacteria	Bacteroidetes	Flavobacteriia	Flavobacteriales	Flavobacteriaceae	unclassified
Otu01650	Bacteria	Cyanobacteria	4C0d-2	SM2F09	unclassified	unclassified
Otu01651	Bacteria	Proteobacteria	Gammaproteobacteria	Alteromonadales	OM60	unclassified
Otu01652	Bacteria	Proteobacteria	Gammaproteobacteria	unclassified	unclassified	unclassified
Otu01653	Bacteria	Proteobacteria	Gammaproteobacteria	unclassified	unclassified	unclassified
Otu01654	Bacteria	Proteobacteria	unclassified	unclassified	unclassified	unclassified
Otu01655	Bacteria	Proteobacteria	Gammaproteobacteria	unclassified	unclassified	unclassified
Otu01656	Bacteria	Proteobacteria	Alphaproteobacteria	Rhodobacterales	Rhodobacteraceae	Roseovarius
Otu01657	Bacteria	Proteobacteria	Gammaproteobacteria	unclassified	unclassified	unclassified
Otu01658	Bacteria	Proteobacteria	unclassified	unclassified	unclassified	unclassified
Otu01659	Bacteria	Proteobacteria	Gammaproteobacteria	Vibrionales	unclassified	unclassified
Otu01660	Bacteria	Proteobacteria	Gammaproteobacteria	Oceanospirillales	Oceanospirillaceae	Marinomonas
Otu01661	Bacteria	Bacteroidetes	Flavobacteriia	Flavobacteriales	unclassified	unclassified
Otu01662	Bacteria	Proteobacteria	Alphaproteobacteria	unclassified	unclassified	unclassified
Otu01663	Bacteria	Proteobacteria	Gammaproteobacteria	Alteromonadales	Alteromonadaceae	Alteromonas
Otu01664	Bacteria	Proteobacteria	Alphaproteobacteria	Rhodobacterales	Hyphomonadaceae	unclassified
Otu01665	Bacteria	Proteobacteria	Alphaproteobacteria	Rhodobacterales	Rhodobacteraceae	unclassified
Otu01666	Bacteria	Proteobacteria	unclassified	unclassified	unclassified	unclassified
Otu01667	Bacteria	Proteobacteria	Alphaproteobacteria	Kiloniellales	Kiloniellaceae	unclassified
Otu01668	Bacteria	Firmicutes	Clostridia	Clostridiales	Veillonellaceae	Megasphaera
Otu01669	Bacteria	Bacteroidetes	Flavobacteriia	Flavobacteriales	Flavobacteriaceae	unclassified
Otu01670	Bacteria	Proteobacteria	Alphaproteobacteria	Rhodobacterales	Rhodobacteraceae	unclassified
Otu01671	Bacteria	Proteobacteria	Alphaproteobacteria	Kiloniellales	Kiloniellaceae	Thalassospira
Otu01672	Bacteria	Proteobacteria	Alphaproteobacteria	unclassified	unclassified	unclassified
Otu01673	Bacteria	Proteobacteria	Alphaproteobacteria	Rhodobacterales	Rhodobacteraceae	unclassified
Otu01674	Bacteria	unclassified	unclassified	unclassified	unclassified	unclassified
Otu01675	Bacteria	Bacteroidetes	Flavobacteriia	Flavobacteriales	Flavobacteriaceae	unclassified
Otu01676	Bacteria	Bacteroidetes	Flavobacteriia	Flavobacteriales	Flavobacteriaceae	unclassified
Otu01677	Bacteria	unclassified	unclassified	unclassified	unclassified	unclassified
Otu01678	Bacteria	Bacteroidetes	Flavobacteriia	Flavobacteriales	Cryomorphaceae	unclassified
Otu01679	Bacteria	Bacteroidetes	Flavobacteriia	Flavobacteriales	Flavobacteriaceae	Arenibacter
Otu01680	Bacteria	Proteobacteria	Alphaproteobacteria	Rickettsiales	Pelagibacteraceae	unclassified
Otu01681	Bacteria	Proteobacteria	Alphaproteobacteria	Rhodobacterales	Rhodobacteraceae	unclassified
Otu01682	Bacteria	Proteobacteria	unclassified	unclassified	unclassified	unclassified
Otu01683	Bacteria	Proteobacteria	Gammaproteobacteria	unclassified	unclassified	unclassified
Otu01684	Bacteria	Proteobacteria	Betaproteobacteria	Neisseriales	Neisseriaceae	Kingella
Otu01685	Bacteria	Proteobacteria	Alphaproteobacteria	Rhodospirillales	Rhodospirillaceae	unclassified
Otu01686	Bacteria	Proteobacteria	Alphaproteobacteria	Rhodobacterales	Rhodobacteraceae	unclassified
Otu01687	Bacteria	Proteobacteria	Alphaproteobacteria	Sphingomonadales	unclassified	unclassified
Otu01688	Bacteria	Proteobacteria	Alphaproteobacteria	Rhodobacterales	Rhodobacteraceae	unclassified
Otu01689	Bacteria	Bacteroidetes	Flavobacteriia	Flavobacteriales	Flavobacteriaceae	unclassified
Otu01690	Bacteria	Proteobacteria	unclassified	unclassified	unclassified	unclassified
Otu01691	Bacteria	Proteobacteria	Alphaproteobacteria	Rhizobiales	unclassified	unclassified
Otu01692	Bacteria	Bacteroidetes	Flavobacteriia	Flavobacteriales	Flavobacteriaceae	unclassified
Otu01693	Bacteria	Bacteroidetes	Flavobacteriia	Flavobacteriales	Flavobacteriaceae	unclassified
Otu01694	Bacteria	unclassified	unclassified	unclassified	unclassified	unclassified
Otu01695	Bacteria	Proteobacteria	unclassified	unclassified	unclassified	unclassified
Otu01696	Bacteria	Proteobacteria	Gammaproteobacteria	unclassified	unclassified	unclassified
Otu01697	Bacteria	Proteobacteria	unclassified	unclassified	unclassified	unclassified
Otu01698	Bacteria	Bacteroidetes	Flavobacteriia	Flavobacteriales	Flavobacteriaceae	Capnocytophaga
Otu01699	Bacteria	Proteobacteria	unclassified	unclassified	unclassified	unclassified
Otu01700	Bacteria	Actinobacteria	Acidimicrobiia	Acidimicrobiales	unclassified	unclassified
Otu01701	Bacteria	Bacteroidetes	Flavobacteriia	Flavobacteriales	Flavobacteriaceae	unclassified
Otu01702	Bacteria	Proteobacteria	unclassified	unclassified	unclassified	unclassified
Otu01703	Bacteria	Bacteroidetes	Flavobacteriia	Flavobacteriales	Flavobacteriaceae	unclassified
Otu01704	Bacteria	Bacteroidetes	Flavobacteriia	Flavobacteriales	Flavobacteriaceae	unclassified
Otu01705	Bacteria	Proteobacteria	unclassified	unclassified	unclassified	unclassified
Otu01706	Bacteria	Acidobacteria	Solibacteres	Solibacterales	PAUC26f	unclassified
Otu01707	Bacteria	Proteobacteria	Gammaproteobacteria	unclassified	unclassified	unclassified
Otu01708	Bacteria	Proteobacteria	Betaproteobacteria	Burkholderiales	Oxalobacteraceae	Polynucleobacter
Otu01709	Bacteria	Planctomycetes	Pla3	unclassified	unclassified	unclassified
Otu01710	Bacteria	Proteobacteria	unclassified	unclassified	unclassified	unclassified
Otu01711	Bacteria	Proteobacteria	Gammaproteobacteria	unclassified	unclassified	unclassified
Otu01712	Bacteria	Bacteroidetes	Flavobacteriia	Flavobacteriales	Flavobacteriaceae	Arenibacter
Otu01713	Bacteria	SBR1093	VHS-B5-50	unclassified	unclassified	unclassified
Otu01714	Bacteria	Proteobacteria	Alphaproteobacteria	unclassified	unclassified	unclassified
Otu01715	Bacteria	Proteobacteria	unclassified	unclassified	unclassified	unclassified
Otu01716	Bacteria	Proteobacteria	Betaproteobacteria	Burkholderiales	Oxalobacteraceae	Janthinobacterium
Otu01717	Bacteria	Spirochaetes	Spirochaetes	Spirochaetales	Spirochaetaceae	Spirochaeta
Otu01718	Bacteria	Fusobacteria	Fusobacteriia	Fusobacteriales	Leptotrichiaceae	Leptotrichia
Otu01719	Bacteria	Cyanobacteria	4C0d-2	MLE1-12	unclassified	unclassified
Otu01720	Bacteria	Proteobacteria	Alphaproteobacteria	Kiloniellales	Kiloniellaceae	unclassified
Otu01721	Bacteria	Proteobacteria	Alphaproteobacteria	Rhizobiales	Bradyrhizobiaceae	Bosea
Otu01722	Bacteria	Bacteroidetes	Flavobacteriia	Flavobacteriales	Flavobacteriaceae	unclassified
Otu01723	Bacteria	Proteobacteria	Deltaproteobacteria	unclassified	unclassified	unclassified
Otu01724	Bacteria	Proteobacteria	unclassified	unclassified	unclassified	unclassified
Otu01725	Bacteria	Bacteroidetes	Flavobacteriia	Flavobacteriales	Cryomorphaceae	Fluviicola
Otu01726	Bacteria	Proteobacteria	Alphaproteobacteria	Rhodobacterales	Rhodobacteraceae	unclassified
Otu01727	Bacteria	Firmicutes	Clostridia	Clostridiales	Lachnospiraceae	Oribacterium
Otu01728	Bacteria	Proteobacteria	Alphaproteobacteria	Rhodospirillales	unclassified	unclassified
Otu01729	Bacteria	Proteobacteria	Alphaproteobacteria	Rhodobacterales	Rhodobacteraceae	unclassified
Otu01730	Bacteria	Proteobacteria	Alphaproteobacteria	Rhizobiales	Methylocystaceae	Pleomorphomonas
Otu01731	Bacteria	Proteobacteria	Gammaproteobacteria	unclassified	unclassified	unclassified
Otu01732	Bacteria	Proteobacteria	Gammaproteobacteria	Alteromonadales	Alteromonadaceae	unclassified
Otu01733	Bacteria	Proteobacteria	unclassified	unclassified	unclassified	unclassified
Otu01734	Bacteria	Proteobacteria	Gammaproteobacteria	Thiotrichales	Piscirickettsiaceae	unclassified
Otu01735	Bacteria	Proteobacteria	Alphaproteobacteria	Kiloniellales	Kiloniellaceae	Thalassospira
Otu01736	Bacteria	Proteobacteria	Alphaproteobacteria	Rhodobacterales	Hyphomonadaceae	Hyphomonas
Otu01737	Bacteria	Proteobacteria	Alphaproteobacteria	Rhodobacterales	Rhodobacteraceae	Marivita
Otu01738	Bacteria	Cyanobacteria	unclassified	unclassified	unclassified	unclassified
Otu01739	Bacteria	Proteobacteria	Alphaproteobacteria	Rhodobacterales	Rhodobacteraceae	unclassified
Otu01740	Bacteria	Proteobacteria	Alphaproteobacteria	Rhodobacterales	Rhodobacteraceae	Nautella
Otu01741	Bacteria	Bacteroidetes	Cytophagia	Cytophagales	Cyclobacteriaceae	unclassified
Otu01742	Bacteria	Proteobacteria	Alphaproteobacteria	Rhodospirillales	Rhodospirillaceae	unclassified
Otu01743	Bacteria	Proteobacteria	Alphaproteobacteria	unclassified	unclassified	unclassified
Otu01744	Bacteria	Proteobacteria	Gammaproteobacteria	Vibrionales	Vibrionaceae	Vibrio
Otu01745	Bacteria	Actinobacteria	Actinobacteria	Actinomycetales	Propionibacteriaceae	Luteococcus
Otu01746	Bacteria	Bacteroidetes	unclassified	unclassified	unclassified	unclassified
Otu01747	Bacteria	Proteobacteria	Gammaproteobacteria	unclassified	unclassified	unclassified
Otu01748	Bacteria	Proteobacteria	Gammaproteobacteria	unclassified	unclassified	unclassified
Otu01749	Bacteria	Proteobacteria	Gammaproteobacteria	Alteromonadales	Alteromonadaceae	Glaciecola
Otu01750	Bacteria	Actinobacteria	Actinobacteria	Actinomycetales	Corynebacteriaceae	Corynebacterium
Otu01751	Bacteria	Bacteroidetes	Flavobacteriia	Flavobacteriales	Flavobacteriaceae	Olleya
Otu01752	Bacteria	Proteobacteria	Gammaproteobacteria	Oceanospirillales	Oceanospirillaceae	Marinomonas
Otu01753	Bacteria	Proteobacteria	Alphaproteobacteria	unclassified	unclassified	unclassified
Otu01754	Bacteria	Proteobacteria	Gammaproteobacteria	Vibrionales	Vibrionaceae	Vibrio
Otu01755	Bacteria	Proteobacteria	Alphaproteobacteria	Rhodobacterales	Rhodobacteraceae	unclassified
Otu01756	Bacteria	Proteobacteria	Alphaproteobacteria	unclassified	unclassified	unclassified
Otu01757	Bacteria	Proteobacteria	Gammaproteobacteria	Alteromonadales	Alteromonadaceae	unclassified
Otu01758	Bacteria	Proteobacteria	Gammaproteobacteria	Alteromonadales	[Chromatiaceae]	Rheinheimera
Otu01759	Bacteria	Cyanobacteria	Synechococcophycideae	Synechococcales	Synechococcaceae	unclassified
Otu01760	Bacteria	Proteobacteria	Gammaproteobacteria	Alteromonadales	OM60	unclassified
Otu01761	Bacteria	Proteobacteria	Deltaproteobacteria	Bdellovibrionales	Bacteriovoracaceae	Bacteriovorax
Otu01762	Bacteria	Bacteroidetes	Flavobacteriia	Flavobacteriales	unclassified	unclassified
Otu01763	Bacteria	Proteobacteria	Deltaproteobacteria	Bdellovibrionales	Bdellovibrionaceae	Bdellovibrio
Otu01764	Bacteria	Proteobacteria	unclassified	unclassified	unclassified	unclassified
Otu01765	Bacteria	Proteobacteria	Alphaproteobacteria	unclassified	unclassified	unclassified
Otu01766	Bacteria	Proteobacteria	Alphaproteobacteria	unclassified	unclassified	unclassified
Otu01767	Bacteria	Proteobacteria	Gammaproteobacteria	Vibrionales	Vibrionaceae	Vibrio
Otu01768	Bacteria	Proteobacteria	Gammaproteobacteria	Alteromonadales	Alteromonadaceae	Alteromonas
Otu01769	Bacteria	Proteobacteria	Gammaproteobacteria	Oceanospirillales	unclassified	unclassified
Otu01770	Bacteria	Proteobacteria	Alphaproteobacteria	Rhizobiales	Methylobacteriaceae	Methylobacterium
Otu01771	Bacteria	Proteobacteria	Gammaproteobacteria	Vibrionales	Vibrionaceae	Vibrio
Otu01772	Bacteria	Proteobacteria	Gammaproteobacteria	Vibrionales	Vibrionaceae	Vibrio
Otu01773	Bacteria	Proteobacteria	unclassified	unclassified	unclassified	unclassified
Otu01774	Bacteria	Proteobacteria	Gammaproteobacteria	Vibrionales	Vibrionaceae	Vibrio
Otu01775	Bacteria	Proteobacteria	Gammaproteobacteria	Oceanospirillales	Oceanospirillaceae	Marinomonas
Otu01776	Bacteria	Proteobacteria	Gammaproteobacteria	Oceanospirillales	unclassified	unclassified
Otu01777	Bacteria	Proteobacteria	Gammaproteobacteria	Oceanospirillales	Oceanospirillaceae	Oceaniserpentilla
Otu01778	Bacteria	Bacteroidetes	Bacteroidia	Bacteroidales	[Paraprevotellaceae]	[Prevotella]
Otu01779	Bacteria	Proteobacteria	Gammaproteobacteria	unclassified	unclassified	unclassified
Otu01780	Bacteria	Proteobacteria	Gammaproteobacteria	Alteromonadales	Alteromonadaceae	Alteromonas
Otu01781	Bacteria	Verrucomicrobia	Verrucomicrobiae	Verrucomicrobiales	Verrucomicrobiaceae	unclassified
Otu01782	Bacteria	Proteobacteria	Alphaproteobacteria	Rickettsiales	Pelagibacteraceae	unclassified
Otu01783	Bacteria	Proteobacteria	Gammaproteobacteria	Oceanospirillales	Alcanivoracaceae	Alcanivorax
Otu01784	Bacteria	Proteobacteria	Gammaproteobacteria	Vibrionales	Vibrionaceae	unclassified
Otu01785	Bacteria	Bacteroidetes	unclassified	unclassified	unclassified	unclassified
Otu01786	Bacteria	Proteobacteria	Gammaproteobacteria	Alteromonadales	Alteromonadaceae	HTCC2207
Otu01787	Bacteria	Proteobacteria	Gammaproteobacteria	Vibrionales	Vibrionaceae	unclassified
Otu01788	Bacteria	Proteobacteria	Gammaproteobacteria	Vibrionales	Vibrionaceae	unclassified
Otu01789	Bacteria	Bacteroidetes	Bacteroidia	Bacteroidales	Prevotellaceae	Prevotella
Otu01790	Bacteria	Proteobacteria	Gammaproteobacteria	Alteromonadales	Alteromonadaceae	unclassified
Otu01791	Bacteria	Proteobacteria	Gammaproteobacteria	Legionellales	Legionellaceae	Legionella
Otu01792	Bacteria	Proteobacteria	Gammaproteobacteria	Alteromonadales	Alteromonadaceae	unclassified
Otu01793	Bacteria	Proteobacteria	Alphaproteobacteria	Rhodobacterales	Rhodobacteraceae	unclassified
Otu01794	Bacteria	Proteobacteria	Gammaproteobacteria	Oceanospirillales	Oleiphilaceae	unclassified
Otu01795	Bacteria	Proteobacteria	Gammaproteobacteria	Alteromonadales	unclassified	unclassified
Otu01796	Bacteria	Proteobacteria	Deltaproteobacteria	Bdellovibrionales	Bacteriovoracaceae	Bacteriovorax
Otu01797	Bacteria	Proteobacteria	Gammaproteobacteria	Legionellales	Coxiellaceae	Coxiella
Otu01798	Bacteria	Bacteroidetes	Flavobacteriia	Flavobacteriales	Flavobacteriaceae	unclassified
Otu01799	Bacteria	Cyanobacteria	Synechococcophycideae	Synechococcales	Synechococcaceae	unclassified
Otu01800	Bacteria	Proteobacteria	Alphaproteobacteria	Rickettsiales	Pelagibacteraceae	unclassified
Otu01801	Bacteria	Proteobacteria	Alphaproteobacteria	Rhodobacterales	Rhodobacteraceae	unclassified
Otu01802	Bacteria	Bacteroidetes	[Saprospirae]	[Saprospirales]	Saprospiraceae	unclassified
Otu01803	Bacteria	Cyanobacteria	Synechococcophycideae	Synechococcales	Synechococcaceae	unclassified
Otu01804	Bacteria	Proteobacteria	Gammaproteobacteria	Vibrionales	Pseudoalteromonadaceae	Pseudoalteromonas
Otu01805	Bacteria	Proteobacteria	Alphaproteobacteria	unclassified	unclassified	unclassified
Otu01806	Bacteria	Proteobacteria	Gammaproteobacteria	Oceanospirillales	Oceanospirillaceae	unclassified
Otu01807	Bacteria	Proteobacteria	Gammaproteobacteria	unclassified	unclassified	unclassified
Otu01808	Bacteria	Proteobacteria	Gammaproteobacteria	Oceanospirillales	Oceanospirillaceae	unclassified
Otu01809	Bacteria	Proteobacteria	Alphaproteobacteria	Rhodobacterales	Rhodobacteraceae	Paracoccus
Otu01810	Bacteria	Proteobacteria	Gammaproteobacteria	Alteromonadales	Alteromonadaceae	Marinobacter
Otu01811	Bacteria	Proteobacteria	Alphaproteobacteria	Rhizobiales	unclassified	unclassified
Otu01812	Bacteria	Proteobacteria	Alphaproteobacteria	Rhodobacterales	Rhodobacteraceae	unclassified
Otu01813	Bacteria	Proteobacteria	Gammaproteobacteria	Alteromonadales	Alteromonadaceae	Glaciecola
Otu01814	Bacteria	Proteobacteria	Alphaproteobacteria	Rhodobacterales	Rhodobacteraceae	unclassified
Otu01815	Bacteria	Proteobacteria	Gammaproteobacteria	unclassified	unclassified	unclassified
Otu01816	Bacteria	Proteobacteria	unclassified	unclassified	unclassified	unclassified
Otu01817	Bacteria	Proteobacteria	Gammaproteobacteria	Oceanospirillales	Endozoicimonaceae	Endozoicomonas
Otu01818	Bacteria	Bacteroidetes	Flavobacteriia	Flavobacteriales	Flavobacteriaceae	unclassified
Otu01819	Bacteria	Proteobacteria	Alphaproteobacteria	Rickettsiales	Pelagibacteraceae	unclassified
Otu01820	Bacteria	unclassified	unclassified	unclassified	unclassified	unclassified
Otu01821	Bacteria	Proteobacteria	Alphaproteobacteria	Rhodobacterales	Rhodobacteraceae	Loktanella
Otu01822	Bacteria	Proteobacteria	unclassified	unclassified	unclassified	unclassified
Otu01823	Bacteria	Proteobacteria	Gammaproteobacteria	Oceanospirillales	Oceanospirillaceae	Marinomonas
Otu01824	Bacteria	Cyanobacteria	Synechococcophycideae	Synechococcales	Synechococcaceae	unclassified
Otu01825	Bacteria	Proteobacteria	Deltaproteobacteria	FAC87	unclassified	unclassified
Otu01826	Bacteria	Proteobacteria	Alphaproteobacteria	Rhodobacterales	Rhodobacteraceae	unclassified
Otu01827	Bacteria	Proteobacteria	Gammaproteobacteria	Oceanospirillales	Oceanospirillaceae	unclassified
Otu01828	Bacteria	Bacteroidetes	Flavobacteriia	Flavobacteriales	Flavobacteriaceae	Bizionia
Otu01829	Bacteria	Proteobacteria	Alphaproteobacteria	Rhodobacterales	Rhodobacteraceae	unclassified
Otu01830	Bacteria	Proteobacteria	Gammaproteobacteria	Vibrionales	Pseudoalteromonadaceae	Pseudoalteromonas
Otu01831	Bacteria	Proteobacteria	Gammaproteobacteria	Alteromonadales	Alteromonadaceae	Alteromonas
Otu01832	Bacteria	Proteobacteria	Gammaproteobacteria	Oceanospirillales	unclassified	unclassified
Otu01833	Bacteria	Proteobacteria	Alphaproteobacteria	Rhizobiales	unclassified	unclassified
Otu01834	Bacteria	Proteobacteria	Gammaproteobacteria	Vibrionales	Vibrionaceae	Vibrio
Otu01835	Bacteria	Proteobacteria	Alphaproteobacteria	Rhodobacterales	Rhodobacteraceae	unclassified
Otu01836	Bacteria	Proteobacteria	Alphaproteobacteria	Rhodobacterales	Rhodobacteraceae	unclassified
Otu01837	Bacteria	Proteobacteria	Gammaproteobacteria	Alteromonadales	Alteromonadaceae	Alteromonas
Otu01838	Bacteria	Proteobacteria	Deltaproteobacteria	Myxococcales	unclassified	unclassified
Otu01839	Bacteria	Proteobacteria	Deltaproteobacteria	Myxococcales	OM27	unclassified
Otu01840	Bacteria	Proteobacteria	Gammaproteobacteria	Alteromonadales	Alteromonadaceae	HTCC2207
Otu01841	Bacteria	Proteobacteria	Gammaproteobacteria	Alteromonadales	OM60	unclassified
Otu01842	Bacteria	Acidobacteria	[Chloracidobacteria]	RB41	Ellin6075	unclassified
Otu01843	Bacteria	Proteobacteria	Gammaproteobacteria	Alteromonadales	Alteromonadaceae	Glaciecola
Otu01844	Bacteria	Bacteroidetes	Flavobacteriia	Flavobacteriales	Flavobacteriaceae	unclassified
Otu01845	Bacteria	Bacteroidetes	Flavobacteriia	Flavobacteriales	Flavobacteriaceae	unclassified
Otu01846	Bacteria	Proteobacteria	Gammaproteobacteria	Oceanospirillales	Oceanospirillaceae	unclassified
Otu01847	Bacteria	Proteobacteria	Gammaproteobacteria	Alteromonadales	Alteromonadaceae	Alteromonas
Otu01848	Bacteria	Verrucomicrobia	Verrucomicrobiae	Verrucomicrobiales	Verrucomicrobiaceae	Verrucomicrobium
Otu01849	Bacteria	Proteobacteria	Gammaproteobacteria	Oceanospirillales	Oceanospirillaceae	Oleibacter
Otu01850	Bacteria	Proteobacteria	unclassified	unclassified	unclassified	unclassified
Otu01851	Bacteria	Bacteroidetes	Flavobacteriia	Flavobacteriales	[Weeksellaceae]	Chryseobacterium
Otu01852	Bacteria	Proteobacteria	Gammaproteobacteria	Alteromonadales	OM60	unclassified
Otu01853	Bacteria	Proteobacteria	Gammaproteobacteria	Alteromonadales	HTCC2188	HTCC
Otu01854	Bacteria	Bacteroidetes	Flavobacteriia	Flavobacteriales	Flavobacteriaceae	unclassified
Otu01855	Bacteria	Cyanobacteria	4C0d-2	MLE1-12	unclassified	unclassified
Otu01856	Bacteria	Proteobacteria	Gammaproteobacteria	Alteromonadales	Alteromonadaceae	unclassified
Otu01857	Bacteria	Proteobacteria	Betaproteobacteria	Nitrosomonadales	Nitrosomonadaceae	unclassified
Otu01858	Bacteria	Proteobacteria	Alphaproteobacteria	Rhodobacterales	Rhodobacteraceae	Ruegeria
Otu01859	Bacteria	Proteobacteria	Alphaproteobacteria	Rhodospirillales	Rhodospirillaceae	unclassified
Otu01860	Bacteria	Proteobacteria	Gammaproteobacteria	Alteromonadales	Alteromonadaceae	Umboniibacter
Otu01861	Bacteria	Proteobacteria	Gammaproteobacteria	Alteromonadales	Alteromonadaceae	Alteromonas
Otu01862	Bacteria	Proteobacteria	Betaproteobacteria	unclassified	unclassified	unclassified
Otu01863	Bacteria	Bacteroidetes	Flavobacteriia	Flavobacteriales	Flavobacteriaceae	unclassified
Otu01864	Bacteria	Proteobacteria	Alphaproteobacteria	Rhodobacterales	Rhodobacteraceae	Nautella
Otu01865	Bacteria	Proteobacteria	Gammaproteobacteria	Alteromonadales	Alteromonadaceae	unclassified
Otu01866	Bacteria	Cyanobacteria	4C0d-2	MLE1-12	unclassified	unclassified
Otu01867	Bacteria	Cyanobacteria	Synechococcophycideae	Pseudanabaenales	Pseudanabaenaceae	unclassified
Otu01868	Bacteria	Proteobacteria	Gammaproteobacteria	Alteromonadales	unclassified	unclassified
Otu01869	Bacteria	Proteobacteria	Gammaproteobacteria	Alteromonadales	OM60	unclassified
Otu01870	Bacteria	Proteobacteria	Alphaproteobacteria	Rhodobacterales	Rhodobacteraceae	Octadecabacter
Otu01871	Bacteria	Bacteroidetes	Flavobacteriia	Flavobacteriales	Flavobacteriaceae	unclassified
Otu01872	Bacteria	Proteobacteria	unclassified	unclassified	unclassified	unclassified
Otu01873	Bacteria	Proteobacteria	Alphaproteobacteria	Rhodobacterales	Rhodobacteraceae	unclassified
Otu01874	Bacteria	Proteobacteria	Gammaproteobacteria	unclassified	unclassified	unclassified
Otu01875	Bacteria	Proteobacteria	unclassified	unclassified	unclassified	unclassified
Otu01876	Bacteria	Proteobacteria	Gammaproteobacteria	Alteromonadales	Alteromonadaceae	HTCC2207
Otu01877	Bacteria	Firmicutes	Bacilli	Bacillales	Planococcaceae	Planococcus
Otu01878	Bacteria	Proteobacteria	Gammaproteobacteria	unclassified	unclassified	unclassified
Otu01879	Bacteria	Bacteroidetes	Flavobacteriia	Flavobacteriales	Flavobacteriaceae	Mesonia
Otu01880	Bacteria	Proteobacteria	Alphaproteobacteria	unclassified	unclassified	unclassified
Otu01881	Bacteria	Proteobacteria	Alphaproteobacteria	unclassified	unclassified	unclassified
Otu01882	Bacteria	Proteobacteria	unclassified	unclassified	unclassified	unclassified
Otu01883	Bacteria	Firmicutes	Bacilli	Bacillales	[Exiguobacteraceae]	Exiguobacterium
Otu01884	Bacteria	Firmicutes	Bacilli	Bacillales	Planococcaceae	unclassified
Otu01885	Bacteria	Proteobacteria	Gammaproteobacteria	unclassified	unclassified	unclassified
Otu01886	Bacteria	Firmicutes	Bacilli	Bacillales	Bacillaceae	Bacillus
Otu01887	Bacteria	Proteobacteria	Gammaproteobacteria	Alteromonadales	Alteromonadaceae	Alteromonas
Otu01888	Bacteria	Proteobacteria	Alphaproteobacteria	unclassified	unclassified	unclassified
Otu01889	Bacteria	Proteobacteria	Gammaproteobacteria	Vibrionales	Pseudoalteromonadaceae	Pseudoalteromonas
Otu01890	Bacteria	Proteobacteria	Gammaproteobacteria	Alteromonadales	Alteromonadaceae	unclassified
Otu01891	Bacteria	Proteobacteria	unclassified	unclassified	unclassified	unclassified
Otu01892	Bacteria	Cyanobacteria	Oscillatoriophycideae	Chroococcales	Xenococcaceae	unclassified
Otu01893	Bacteria	Proteobacteria	Gammaproteobacteria	unclassified	unclassified	unclassified
Otu01894	Bacteria	Proteobacteria	Betaproteobacteria	Burkholderiales	Comamonadaceae	RS62
Otu01895	Bacteria	Proteobacteria	Gammaproteobacteria	unclassified	unclassified	unclassified
Otu01896	Bacteria	Firmicutes	Bacilli	Lactobacillales	Streptococcaceae	Streptococcus
Otu01897	Bacteria	Proteobacteria	Gammaproteobacteria	Alteromonadales	OM60	unclassified
Otu01898	Bacteria	Proteobacteria	Alphaproteobacteria	unclassified	unclassified	unclassified
Otu01899	Bacteria	Proteobacteria	Gammaproteobacteria	unclassified	unclassified	unclassified
Otu01900	Bacteria	Proteobacteria	Alphaproteobacteria	unclassified	unclassified	unclassified
Otu01901	Bacteria	Proteobacteria	Alphaproteobacteria	unclassified	unclassified	unclassified
Otu01902	Bacteria	Proteobacteria	Alphaproteobacteria	unclassified	unclassified	unclassified
Otu01903	Bacteria	Proteobacteria	Gammaproteobacteria	Alteromonadales	Alteromonadaceae	Alteromonas
Otu01904	Bacteria	Proteobacteria	Gammaproteobacteria	unclassified	unclassified	unclassified
Otu01905	Bacteria	Proteobacteria	Gammaproteobacteria	Alteromonadales	Alteromonadaceae	Glaciecola
Otu01906	Bacteria	Proteobacteria	Gammaproteobacteria	unclassified	unclassified	unclassified
Otu01907	Bacteria	Proteobacteria	Gammaproteobacteria	unclassified	unclassified	unclassified
Otu01908	Bacteria	Proteobacteria	Alphaproteobacteria	unclassified	unclassified	unclassified
Otu01909	Bacteria	Bacteroidetes	Flavobacteriia	Flavobacteriales	Flavobacteriaceae	Ulvibacter
Otu01910	Bacteria	Proteobacteria	Gammaproteobacteria	unclassified	unclassified	unclassified
Otu01911	Bacteria	Bacteroidetes	Flavobacteriia	Flavobacteriales	Flavobacteriaceae	unclassified
Otu01912	Bacteria	Proteobacteria	Gammaproteobacteria	unclassified	unclassified	unclassified
Otu01913	Bacteria	Proteobacteria	Gammaproteobacteria	Alteromonadales	unclassified	unclassified
Otu01914	Bacteria	Proteobacteria	Alphaproteobacteria	unclassified	unclassified	unclassified
Otu01915	Bacteria	Proteobacteria	Alphaproteobacteria	unclassified	unclassified	unclassified
Otu01916	Bacteria	Proteobacteria	Gammaproteobacteria	unclassified	unclassified	unclassified
Otu01917	Bacteria	Bacteroidetes	Bacteroidia	Bacteroidales	Porphyromonadaceae	Porphyromonas
Otu01918	Bacteria	Proteobacteria	unclassified	unclassified	unclassified	unclassified
Otu01919	Bacteria	Bacteroidetes	Flavobacteriia	Flavobacteriales	Flavobacteriaceae	unclassified
Otu01920	Bacteria	Proteobacteria	Gammaproteobacteria	unclassified	unclassified	unclassified
Otu01921	Bacteria	Proteobacteria	Gammaproteobacteria	Alteromonadales	Alteromonadaceae	Alteromonas
Otu01922	Bacteria	Proteobacteria	unclassified	unclassified	unclassified	unclassified
Otu01923	Bacteria	Proteobacteria	Alphaproteobacteria	unclassified	unclassified	unclassified
Otu01924	Bacteria	Proteobacteria	Gammaproteobacteria	Alteromonadales	Alteromonadaceae	unclassified
Otu01925	Bacteria	Proteobacteria	Alphaproteobacteria	Rhodospirillales	unclassified	unclassified
Otu01926	Bacteria	Proteobacteria	Gammaproteobacteria	Oceanospirillales	Oceanospirillaceae	Neptuniibacter
Otu01927	Bacteria	Proteobacteria	unclassified	unclassified	unclassified	unclassified
Otu01928	Bacteria	Proteobacteria	Alphaproteobacteria	Rickettsiales	Pelagibacteraceae	unclassified
Otu01929	Bacteria	Proteobacteria	Gammaproteobacteria	Alteromonadales	Alteromonadaceae	Alteromonas
Otu01930	Bacteria	Proteobacteria	Gammaproteobacteria	unclassified	unclassified	unclassified
Otu01931	Bacteria	Proteobacteria	Gammaproteobacteria	Vibrionales	Pseudoalteromonadaceae	Pseudoalteromonas
Otu01932	Bacteria	Proteobacteria	Gammaproteobacteria	Alteromonadales	J115	unclassified
Otu01933	Bacteria	Proteobacteria	unclassified	unclassified	unclassified	unclassified
Otu01934	Bacteria	Proteobacteria	Alphaproteobacteria	unclassified	unclassified	unclassified
Otu01935	Bacteria	Proteobacteria	Alphaproteobacteria	Rhodospirillales	unclassified	unclassified
Otu01936	Bacteria	Bacteroidetes	unclassified	unclassified	unclassified	unclassified
Otu01937	Bacteria	Proteobacteria	Betaproteobacteria	Burkholderiales	Comamonadaceae	RS62
Otu01938	Bacteria	Proteobacteria	unclassified	unclassified	unclassified	unclassified
Otu01939	Bacteria	Proteobacteria	Alphaproteobacteria	unclassified	unclassified	unclassified
Otu01940	Bacteria	Proteobacteria	unclassified	unclassified	unclassified	unclassified
Otu01941	Bacteria	Proteobacteria	unclassified	unclassified	unclassified	unclassified
Otu01942	Bacteria	Proteobacteria	Gammaproteobacteria	Alteromonadales	Alteromonadaceae	Alteromonas
Otu01943	Bacteria	Proteobacteria	Gammaproteobacteria	Alteromonadales	Alteromonadaceae	Alteromonas
Otu01944	Bacteria	Proteobacteria	Gammaproteobacteria	unclassified	unclassified	unclassified
Otu01945	Bacteria	Proteobacteria	Alphaproteobacteria	unclassified	unclassified	unclassified
Otu01946	Bacteria	Proteobacteria	Gammaproteobacteria	unclassified	unclassified	unclassified
Otu01947	Bacteria	Proteobacteria	Deltaproteobacteria	Desulfobacterales	Nitrospinaceae	Nitrospina
Otu01948	Bacteria	Proteobacteria	unclassified	unclassified	unclassified	unclassified
Otu01949	Bacteria	Proteobacteria	Gammaproteobacteria	Alteromonadales	Alteromonadaceae	HTCC2207
Otu01950	Bacteria	Proteobacteria	Gammaproteobacteria	Alteromonadales	Alteromonadaceae	Alteromonas
Otu01951	Bacteria	Firmicutes	Bacilli	Lactobacillales	Streptococcaceae	Streptococcus
Otu01952	Bacteria	Proteobacteria	Gammaproteobacteria	Vibrionales	unclassified	unclassified
Otu01953	Bacteria	Proteobacteria	Gammaproteobacteria	Vibrionales	Pseudoalteromonadaceae	Pseudoalteromonas
Otu01954	Bacteria	Proteobacteria	Alphaproteobacteria	Rhodobacterales	Rhodobacteraceae	unclassified
Otu01955	Bacteria	Proteobacteria	Gammaproteobacteria	Vibrionales	Vibrionaceae	Vibrio
Otu01956	Bacteria	Proteobacteria	Alphaproteobacteria	Rhizobiales	unclassified	unclassified
Otu01957	Bacteria	Proteobacteria	Gammaproteobacteria	Vibrionales	Vibrionaceae	Vibrio
Otu01958	Bacteria	Proteobacteria	Gammaproteobacteria	Vibrionales	Vibrionaceae	Vibrio
Otu01959	Bacteria	Proteobacteria	Gammaproteobacteria	Vibrionales	Vibrionaceae	Vibrio
Otu01960	Bacteria	Proteobacteria	Gammaproteobacteria	unclassified	unclassified	unclassified
Otu01961	Bacteria	Proteobacteria	Gammaproteobacteria	unclassified	unclassified	unclassified
Otu01962	Bacteria	Proteobacteria	Gammaproteobacteria	Vibrionales	unclassified	unclassified
Otu01963	Bacteria	Proteobacteria	Gammaproteobacteria	Vibrionales	Vibrionaceae	Vibrio
Otu01964	Bacteria	Proteobacteria	Alphaproteobacteria	Rhizobiales	unclassified	unclassified
Otu01965	Bacteria	Proteobacteria	Gammaproteobacteria	Vibrionales	Pseudoalteromonadaceae	Pseudoalteromonas
Otu01966	Bacteria	Proteobacteria	Gammaproteobacteria	Vibrionales	unclassified	unclassified
Otu01967	Bacteria	Proteobacteria	Gammaproteobacteria	Vibrionales	Vibrionaceae	Vibrio
Otu01968	Bacteria	Proteobacteria	Gammaproteobacteria	Vibrionales	Vibrionaceae	unclassified
Otu01969	Bacteria	Bacteroidetes	Flavobacteriia	Flavobacteriales	Flavobacteriaceae	Polaribacter
Otu01970	Bacteria	Proteobacteria	Gammaproteobacteria	Oceanospirillales	Oceanospirillaceae	unclassified
Otu01971	Bacteria	Proteobacteria	Gammaproteobacteria	Oceanospirillales	Oceanospirillaceae	Marinomonas
Otu01972	Bacteria	Proteobacteria	Gammaproteobacteria	Vibrionales	Vibrionaceae	Vibrio
Otu01973	Bacteria	Proteobacteria	Gammaproteobacteria	Oceanospirillales	Oceanospirillaceae	Oceaniserpentilla
Otu01974	Bacteria	Bacteroidetes	unclassified	unclassified	unclassified	unclassified
Otu01975	Bacteria	Bacteroidetes	unclassified	unclassified	unclassified	unclassified
Otu01976	Bacteria	Proteobacteria	Alphaproteobacteria	Rhodobacterales	Rhodobacteraceae	unclassified
Otu01977	Bacteria	Proteobacteria	Gammaproteobacteria	Oceanospirillales	Oleiphilaceae	unclassified
Otu01978	Bacteria	Bacteroidetes	unclassified	unclassified	unclassified	unclassified
Otu01979	Bacteria	Proteobacteria	Alphaproteobacteria	Rhodobacterales	Rhodobacteraceae	unclassified
Otu01980	Bacteria	Proteobacteria	Alphaproteobacteria	Rickettsiales	Pelagibacteraceae	unclassified
Otu01981	Bacteria	Proteobacteria	Deltaproteobacteria	NB1-j	JTB38	unclassified
Otu01982	Bacteria	Proteobacteria	Alphaproteobacteria	Rhodobacterales	Rhodobacteraceae	unclassified
Otu01983	Bacteria	Proteobacteria	Alphaproteobacteria	Rhodobacterales	Rhodobacteraceae	unclassified
Otu01984	Bacteria	Proteobacteria	Gammaproteobacteria	unclassified	unclassified	unclassified
Otu01985	Bacteria	Proteobacteria	Alphaproteobacteria	Rhodobacterales	Rhodobacteraceae	unclassified
Otu01986	Bacteria	Proteobacteria	Gammaproteobacteria	unclassified	unclassified	unclassified
Otu01987	Bacteria	Proteobacteria	Gammaproteobacteria	Vibrionales	Vibrionaceae	Vibrio
Otu01988	Bacteria	Proteobacteria	Gammaproteobacteria	Vibrionales	unclassified	unclassified
Otu01989	Bacteria	unclassified	unclassified	unclassified	unclassified	unclassified
Otu01990	Bacteria	Bacteroidetes	Flavobacteriia	Flavobacteriales	Flavobacteriaceae	Kriegella
Otu01991	Bacteria	Proteobacteria	Alphaproteobacteria	Rhizobiales	unclassified	unclassified
Otu01992	Bacteria	Proteobacteria	Deltaproteobacteria	Bdellovibrionales	Bdellovibrionaceae	Bdellovibrio
Otu01993	Bacteria	Proteobacteria	Gammaproteobacteria	unclassified	unclassified	unclassified
Otu01994	Bacteria	Proteobacteria	Alphaproteobacteria	Rhodobacterales	Rhodobacteraceae	unclassified
Otu01995	Bacteria	Proteobacteria	Alphaproteobacteria	Rhodobacterales	Rhodobacteraceae	Ruegeria
Otu01996	Bacteria	Bacteroidetes	Flavobacteriia	Flavobacteriales	Flavobacteriaceae	Lacinutrix
Otu01997	Bacteria	Proteobacteria	Alphaproteobacteria	Rhodobacterales	Rhodobacteraceae	Nautella
Otu01998	Bacteria	Proteobacteria	Alphaproteobacteria	Rhodobacterales	Rhodobacteraceae	unclassified
Otu01999	Bacteria	Bacteroidetes	Flavobacteriia	Flavobacteriales	Flavobacteriaceae	unclassified
[truncated: 7,687 more rows]
